# Supplementary material for: Complex Mutation Profiles in Mismatch Repair and Ribonucleotide Reductase Mutants Reveal Novel Repair Substrate Specificity of MutS Homolog (MSH) Complexes
Source: bioRxiv preprint, doi:10.1101/2021.06.30.450577, version 4 (2022-02-14)
Supplement: Table S22 _ all variants [file 450577_file09.xlsx]

## Sheet: Sheet1
Source	Reference.Position	SNP.ID	Type	Length	Reference	Allele	Count	Coverage	Frequency	Average.quality	Group	pGAL	Growth.Condition	Parent.Strain	Bio.Rep	GrpRep	CONTEXT	SNV.Split	Ins.Split	Del.Split	SNV.Split	Clust.I.D.	Context_long	Context_left	Comp_context	triContext	compofref	compofvariant	SNVtrichange	SNV_TriContext	Extended_context	Genotype_reps	Position1_annotation	Tech_rep	GAL_status
16_v.txt	31675	31675-SNV-A-C	SNV	1	A	C	4	16169	0.0247387	50.25	msh2	FALSE	CAN	JSY22	1	msh2-Rep1	AAG	A>C	G/C+1	A/T-1	TA>GC	TA>GC	GATCAAAGGTAAT	AGGTAAT	TTC	TTC	T	G	T>G	T>G_TTC	TA>GC_AGGTAAT	4	1792	FALSE	FALSE
16_v.txt	31723	31723-SNV-A-C	SNV	1	A	C	6	16169	0.037108	57.5	msh2	FALSE	CAN	JSY22	1	msh2-Rep1	CAA	A>C	G/C+1	A/T-1	TA>GC	TA>GC	TGTCCCAAAAAGT	AAAAAGT	GTT	GTT	T	G	T>G	T>G_GTT	TA>GC_AAAAAGT	4	1744	FALSE	FALSE
16_v.txt	31964	31964-SNV-A-C	SNV	1	A	C	94	26886	0.349624	36.5638	msh2	FALSE	CAN	JSY22	1	msh2-Rep1	CAT	A>C	G/C+1	A/T-1	TA>GC	TA>GC	GGCCGCATAATAA	ATAATAA	GTA	GTA	T	G	T>G	T>G_GTA	TA>GC_ATAATAA	4	1503	FALSE	FALSE
16_v.txt	32162	32162-SNV-A-C	SNV	1	A	C	9	26886	0.0334747	46.2222	msh2	FALSE	CAN	JSY22	1	msh2-Rep1	AAG	A>C	G/C+1	A/T-1	TA>GC	TA>GC	AGCCAAAGCGCCA	AGCGCCA	TTC	TTC	T	G	T>G	T>G_TTC	TA>GC_AGCGCCA	4	1305	FALSE	FALSE
16_v.txt	32294	32294-SNV-A-C	SNV	1	A	C	14	34999	0.0400011	38.0714	msh2	FALSE	CAN	JSY22	1	msh2-Rep1	AAT	A>C	G/C+1	A/T-1	TA>GC	TA>GC	ATTTGAATTTGCG	ATTTGCG	TTA	TTA	T	G	T>G	T>G_TTA	TA>GC_ATTTGCG	4	1173	FALSE	FALSE
16_v.txt	32346	32346-SNV-A-C	SNV	1	A	C	3	34999	0.008572	46.3333	msh2	FALSE	CAN	JSY22	1	msh2-Rep1	CAA	A>C	G/C+1	A/T-1	TA>GC	TA>GC	TGTGGCAAAACCT	AAAACCT	GTT	GTT	T	G	T>G	T>G_GTT	TA>GC_AAAACCT	4	1121	FALSE	FALSE
16_v.txt	32493	32493-SNV-A-C	SNV	1	A	C	21	34999	0.0600017	21.5714	msh2	FALSE	CAN	JSY22	1	msh2-Rep1	AAC	A>C	G/C+1	A/T-1	TA>GC	TA>GC	CGGAAAACAACTT	ACAACTT	TTG	TTG	T	G	T>G	T>G_TTG	TA>GC_ACAACTT	4	974	FALSE	FALSE
16_v.txt	32574	32574-SNV-T-G	SNV	1	T	G	13	32356	0.040178	37	msh2	FALSE	CAN	JSY22	1	msh2-Rep1	TTG	T>G	G/C+1	A/T-1	TA>GC	TA>GC	GTACCTTGAAATG	TGAAATG	AAC	TTG	T	C	T>G	T>G_TTG	TA>GC_TGAAATG	4	893	FALSE	FALSE
16_v.txt	32631	32631-SNV-T-G	SNV	1	T	G	4	32356	0.0123625	31.7511	msh2	FALSE	CAN	JSY22	1	msh2-Rep1	GTT	T>G	G/C+1	A/T-1	TA>GC	TA>GC	CCTTCGTTTTTAT	TTTTTAT	CAA	GTT	T	C	T>G	T>G_GTT	TA>GC_TTTTTAT	4	836	FALSE	FALSE
16_v.txt	32823	32823-SNV-A-C	SNV	1	A	C	10	32356	0.0309062	43.2	msh2	FALSE	CAN	JSY22	1	msh2-Rep1	CAT	A>C	G/C+1	A/T-1	TA>GC	TA>GC	AAGTTCATTATTG	ATTATTG	GTA	GTA	T	G	T>G	T>G_GTA	TA>GC_ATTATTG	4	644	FALSE	FALSE
16_v.txt	32842	32842-SNV-A-C	SNV	1	A	C	4	32356	0.0123625	44.4996	msh2	FALSE	CAN	JSY22	1	msh2-Rep1	CAA	A>C	G/C+1	A/T-1	TA>GC	TA>GC	TTACCCAAAAAAT	AAAAAAT	GTT	GTT	T	G	T>G	T>G_GTT	TA>GC_AAAAAAT	4	625	FALSE	FALSE
16_v.txt	32884	32884-SNV-A-C	SNV	1	A	C	4	33576	0.0119133	31.2483	msh2	FALSE	CAN	JSY22	1	msh2-Rep1	CAA	A>C	G/C+1	A/T-1	TA>GC	TA>GC	ACGTCCAAAATTG	AAAATTG	GTT	GTT	T	G	T>G	T>G_GTT	TA>GC_AAAATTG	4	583	FALSE	FALSE
16_v.txt	32913	32913-SNV-A-C	SNV	1	A	C	31	33576	0.0923279	23.8065	msh2	FALSE	CAN	JSY22	1	msh2-Rep1	AAG	A>C	G/C+1	A/T-1	TA>GC	TA>GC	ACACTAAGTTCCA	AGTTCCA	TTC	TTC	T	G	T>G	T>G_TTC	TA>GC_AGTTCCA	4	554	FALSE	FALSE
16_v.txt	32926	32926-SNV-A-C	SNV	1	A	C	112	33576	0.333572	46.1429	msh2	FALSE	CAN	JSY22	1	msh2-Rep1	AAA	A>C	G/C+1	A/T-1	TA>GC	TA>GC	GGGCAAAAGTGAT	AAGTGAT	TTT	TTT	T	G	T>G	T>G_TTT	TA>GC_AAGTGAT	4	541	FALSE	FALSE
16_v.txt	33099	33099-SNV-A-C	SNV	1	A	C	24	33576	0.0714796	43.875	msh2	FALSE	CAN	JSY22	1	msh2-Rep1	AAG	A>C	G/C+1	A/T-1	TA>GC	TA>GC	GATATAAGAGCGC	AGAGCGC	TTC	TTC	T	G	T>G	T>G_TTC	TA>GC_AGAGCGC	4	368	FALSE	FALSE
16_v.txt	33131	33131-SNV-T-G	SNV	1	T	G	2	33576	0.005957	50.9973	msh2	FALSE	CAN	JSY22	1	msh2-Rep1	GTG	T>G	G/C+1	A/T-1	TA>GC	TA>GC	CAGAGGTGTGGAT	TGTGGAT	CAC	GTG	T	C	T>G	T>G_GTG	TA>GC_TGTGGAT	4	336	FALSE	FALSE
16_v.txt	33204	33204-SNV-A-C	SNV	1	A	C	26	19792	0.131366	38.6917	msh2	FALSE	CAN	JSY22	1	msh2-Rep1	AAG	A>C	G/C+1	A/T-1	TA>GC	TA>GC	TGCTTAAGCTCTC	AGCTCTC	TTC	TTC	T	G	T>G	T>G_TTC	TA>GC_AGCTCTC	4	263	FALSE	FALSE
16_v.txt	33269	33269-SNV-A-C	SNV	1	A	C	160	19792	0.808407	16.8062	msh2	FALSE	CAN	JSY22	1	msh2-Rep1	TAG	A>C	G/C+1	A/T-1	TA>GC	TA>GC	CTCCATAGAGAAC	AGAGAAC	ATC	ATC	T	G	T>G	T>G_ATC	TA>GC_AGAGAAC	4	198	FALSE	FALSE
16_v.txt	32086	32086-SNV-A-G	SNV	1	A	G	22	26886	0.081827	58.8179	msh2	FALSE	CAN	JSY22	1	msh2-Rep1	AAG	A>G	G/C+1	A/T-1	TA>CG	TA>CG	CAAAAAAGCCTGC	AGCCTGC	TTC	TTC	T	C	T>C	T>C_TTC	TA>CG_AGCCTGC	4	1381	FALSE	FALSE
16_v.txt	32256	32256-SNV-A-G	SNV	1	A	G	246	34990	0.703058	36.8008	msh2	FALSE	CAN	JSY22	1	msh2-Rep1	TAG	A>G	G/C+1	A/T-1	TA>CG	TA>CG	TTTGATAGACCAA	AGACCAA	ATC	ATC	T	C	T>C	T>C_ATC	TA>CG_AGACCAA	4	1211	FALSE	FALSE
16_v.txt	32490	32490-SNV-A-G	SNV	1	A	G	50	34999	0.142861	43.04	msh2	FALSE	CAN	JSY22	1	msh2-Rep1	GAA	A>G	G/C+1	A/T-1	TA>CG	TA>CG	ATACGGAAAACAA	AAAACAA	CTT	CTT	T	C	T>C	T>C_CTT	TA>CG_AAAACAA	4	977	FALSE	FALSE
16_v.txt	32680	32680-SNV-A-G	SNV	1	A	G	70	32355	0.21635	60.7712	msh2	FALSE	CAN	JSY22	1	msh2-Rep1	CAA	A>G	G/C+1	A/T-1	TA>CG	TA>CG	TTCTCCAATAACG	AATAACG	GTT	GTT	T	C	T>C	T>C_GTT	TA>CG_AATAACG	4	787	FALSE	FALSE
16_v.txt	32810	32810-SNV-A-G	SNV	1	A	G	17	32356	0.0525405	45.2353	msh2	FALSE	CAN	JSY22	1	msh2-Rep1	CAG	A>G	G/C+1	A/T-1	TA>CG	TA>CG	TTTGACAGGGAAC	AGGGAAC	GTC	GTC	T	C	T>C	T>C_GTC	TA>CG_AGGGAAC	4	657	FALSE	FALSE
16_v.txt	32884	32884-SNV-A-G	SNV	1	A	G	8	33576	0.0238265	34.1211	msh2	FALSE	CAN	JSY22	1	msh2-Rep1	CAA	A>G	G/C+1	A/T-1	TA>CG	TA>CG	ACGTCCAAAATTG	AAAATTG	GTT	GTT	T	C	T>C	T>C_GTT	TA>CG_AAAATTG	4	583	FALSE	FALSE
16_v.txt	32929	32929-SNV-T-C	SNV	1	T	C	85	33576	0.253157	48.9294	msh2	FALSE	CAN	JSY22	1	msh2-Rep1	GTG	T>C	G/C+1	A/T-1	TA>CG	TA>CG	CAAAAGTGATTGC	TGATTGC	CAC	GTG	T	G	T>C	T>C_GTG	TA>CG_TGATTGC	4	538	FALSE	FALSE
16_v.txt	32938	32938-SNV-A-G	SNV	1	A	G	39	33576	0.116154	53.6154	msh2	FALSE	CAN	JSY22	1	msh2-Rep1	CAA	A>G	G/C+1	A/T-1	TA>CG	TA>CG	TTGCCCAAGAAAA	AAGAAAA	GTT	GTT	T	C	T>C	T>C_GTT	TA>CG_AAGAAAA	4	529	FALSE	FALSE
16_v.txt	32941	32941-SNV-A-G	SNV	1	A	G	7	33576	0.0208482	52.8459	msh2	FALSE	CAN	JSY22	1	msh2-Rep1	GAA	A>G	G/C+1	A/T-1	TA>CG	TA>CG	CCCAAGAAAACCA	AAAACCA	CTT	CTT	T	C	T>C	T>C_CTT	TA>CG_AAAACCA	4	526	FALSE	FALSE
16_v.txt	32947	32947-SNV-A-G	SNV	1	A	G	28	33576	0.0833929	54.3214	msh2	FALSE	CAN	JSY22	1	msh2-Rep1	CAA	A>G	G/C+1	A/T-1	TA>CG	TA>CG	AAAACCAATACAT	AATACAT	GTT	GTT	T	C	T>C	T>C_GTT	TA>CG_AATACAT	4	520	FALSE	FALSE
16_v.txt	33099	33099-SNV-A-G	SNV	1	A	G	20	33576	0.0595664	49.15	msh2	FALSE	CAN	JSY22	1	msh2-Rep1	AAG	A>G	G/C+1	A/T-1	TA>CG	TA>CG	GATATAAGAGCGC	AGAGCGC	TTC	TTC	T	C	T>C	T>C_TTC	TA>CG_AGAGCGC	4	368	FALSE	FALSE
16_v.txt	31675	31675-SNV-A-T	SNV	1	A	T	10	16169	0.0618467	42.4	msh2	FALSE	CAN	JSY22	1	msh2-Rep1	AAG	A>T	A/T+1	A/T-1	TA>AT	TA>AT	GATCAAAGGTAAT	AGGTAAT	TTC	TTC	T	A	T>A	T>A_TTC	TA>AT_AGGTAAT	4	1792	FALSE	FALSE
16_v.txt	32032	32032-SNV-T-A	SNV	1	T	A	67	26886	0.2492	62.3731	msh2	FALSE	CAN	JSY22	1	msh2-Rep1	TTC	T>A	A/T+1	A/T-1	TA>AT	TA>AT	GGTATTTCAAAGC	TCAAAGC	AAG	TTC	T	T	T>A	T>A_TTC	TA>AT_TCAAAGC	4	1435	FALSE	FALSE
16_v.txt	32081	32081-SNV-A-T	SNV	1	A	T	4	26886	0.0148776	59.9975	msh2	FALSE	CAN	JSY22	1	msh2-Rep1	CAA	A>T	A/T+1	A/T-1	TA>AT	TA>AT	CCATGCAAAAAAG	AAAAAAG	GTT	GTT	T	A	T>A	T>A_GTT	TA>AT_AAAAAAG	4	1386	FALSE	FALSE
16_v.txt	32800	32800-SNV-A-T	SNV	1	A	T	17	32356	0.0525405	47.6471	msh2	FALSE	CAN	JSY22	1	msh2-Rep1	TAA	A>T	A/T+1	A/T-1	TA>AT	TA>AT	CACCGTAATATTT	AATATTT	ATT	ATT	T	A	T>A	T>A_ATT	TA>AT_AATATTT	4	667	FALSE	FALSE
16_v.txt	32810	32810-SNV-A-T	SNV	1	A	T	8	32356	0.0247249	48.625	msh2	FALSE	CAN	JSY22	1	msh2-Rep1	CAG	A>T	A/T+1	A/T-1	TA>AT	TA>AT	TTTGACAGGGAAC	AGGGAAC	GTC	GTC	T	A	T>A	T>A_GTC	TA>AT_AGGGAAC	4	657	FALSE	FALSE
16_v.txt	33099	33099-SNV-A-T	SNV	1	A	T	7	33576	0.0208482	60	msh2	FALSE	CAN	JSY22	1	msh2-Rep1	AAG	A>T	A/T+1	A/T-1	TA>AT	TA>AT	GATATAAGAGCGC	AGAGCGC	TTC	TTC	T	A	T>A	T>A_TTC	TA>AT_AGAGCGC	4	368	FALSE	FALSE
16_v.txt	31650	31650-SNV-C-T	SNV	1	C	T	39	16169	0.241202	36.3077	msh2	FALSE	CAN	JSY22	1	msh2-Rep1	GCG	C>T	A/T+1	G/C-1	CG>TA	CG>TA	AGAATGCGAAATG	CGAAATG	CGC	GCG	C	A	C>T	C>T_GCG	CG>TA_CGAAATG	4	1817	FALSE	FALSE
16_v.txt	31658	31658-SNV-C-T	SNV	1	C	T	23	16169	0.142248	33.7393	msh2	FALSE	CAN	JSY22	1	msh2-Rep1	GCG	C>T	A/T+1	G/C-1	CG>TA	CG>TA	AAATGGCGTGGAA	CGTGGAA	CGC	GCG	C	A	C>T	C>T_GCG	CG>TA_CGTGGAA	4	1809	FALSE	FALSE
16_v.txt	31790	31790-SNV-G-A	SNV	1	G	A	19	16169	0.117509	50.1053	msh2	FALSE	CAN	JSY22	1	msh2-Rep1	CGA	G>A	A/T+1	G/C-1	CG>TA	CG>TA	GATGTCGACATCT	GACATCT	GCT	GCT	C	T	C>T	C>T_GCT	CG>TA_GACATCT	4	1677	FALSE	FALSE
16_v.txt	31830	31830-SNV-C-T	SNV	1	C	T	17	16169	0.105139	56	msh2	FALSE	CAN	JSY22	1	msh2-Rep1	GCA	C>T	A/T+1	G/C-1	CG>TA	CG>TA	AATATGCATTGAA	CATTGAA	CGT	GCA	C	A	C>T	C>T_GCA	CG>TA_CATTGAA	4	1637	FALSE	FALSE
16_v.txt	31881	31881-SNV-G-A	SNV	1	G	A	20	16169	0.123693	43.9493	msh2	FALSE	CAN	JSY22	1	msh2-Rep1	GGC	G>A	A/T+1	G/C-1	CG>TA	CG>TA	TAGGCGGCAGCAA	GCAGCAA	CCG	CCG	C	T	C>T	C>T_CCG	CG>TA_GCAGCAA	4	1586	FALSE	FALSE
16_v.txt	31882	31882-SNV-C-T	SNV	1	C	T	23	16169	0.142248	43.6074	msh2	FALSE	CAN	JSY22	1	msh2-Rep1	GCA	C>T	A/T+1	G/C-1	CG>TA	CG>TA	AGGCGGCAGCAAA	CAGCAAA	CGT	GCA	C	A	C>T	C>T_GCA	CG>TA_CAGCAAA	4	1585	FALSE	FALSE
16_v.txt	31912	31912-SNV-C-T	SNV	1	C	T	16	16169	0.0989548	38.9375	msh2	FALSE	CAN	JSY22	1	msh2-Rep1	GCA	C>T	A/T+1	G/C-1	CG>TA	CG>TA	TTGGTGCAAAAGC	CAAAAGC	CGT	GCA	C	A	C>T	C>T_GCA	CG>TA_CAAAAGC	4	1555	FALSE	FALSE
16_v.txt	31962	31962-SNV-G-A	SNV	1	G	A	50	26886	0.18597	37.3	msh2	FALSE	CAN	JSY22	1	msh2-Rep1	CGC	G>A	A/T+1	G/C-1	CG>TA	CG>TA	GTGGCCGCATAAT	GCATAAT	GCG	GCG	C	T	C>T	C>T_GCG	CG>TA_GCATAAT	4	1505	FALSE	FALSE
16_v.txt	31972	31972-SNV-C-T	SNV	1	C	T	25	26886	0.0929852	35.08	msh2	FALSE	CAN	JSY22	1	msh2-Rep1	GCC	C>T	A/T+1	G/C-1	CG>TA	CG>TA	AATAAGCCAAGCC	CCAAGCC	CGG	GCC	C	A	C>T	C>T_GCC	CG>TA_CCAAGCC	4	1495	FALSE	FALSE
16_v.txt	31981	31981-SNV-G-A	SNV	1	G	A	23	26886	0.0855464	46.8553	msh2	FALSE	CAN	JSY22	1	msh2-Rep1	GGC	G>A	A/T+1	G/C-1	CG>TA	CG>TA	AGCCGGGCATTAA	GCATTAA	CCG	CCG	C	T	C>T	C>T_CCG	CG>TA_GCATTAA	4	1486	FALSE	FALSE
16_v.txt	32057	32057-SNV-C-T	SNV	1	C	T	32	26886	0.119021	53.75	msh2	FALSE	CAN	JSY22	1	msh2-Rep1	GCG	C>T	A/T+1	G/C-1	CG>TA	CG>TA	GATGTGCGAGATT	CGAGATT	CGC	GCG	C	A	C>T	C>T_GCG	CG>TA_CGAGATT	4	1410	FALSE	FALSE
16_v.txt	32075	32075-SNV-C-T	SNV	1	C	T	23	26886	0.0855464	60.9565	msh2	FALSE	CAN	JSY22	1	msh2-Rep1	ACC	C>T	A/T+1	G/C-1	CG>TA	CG>TA	AAATAACCATGCA	CCATGCA	TGG	ACC	C	A	C>T	C>T_ACC	CG>TA_CCATGCA	4	1392	FALSE	FALSE
16_v.txt	32088	32088-SNV-C-T	SNV	1	C	T	36	26886	0.133899	58.0107	msh2	FALSE	CAN	JSY22	1	msh2-Rep1	GCC	C>T	A/T+1	G/C-1	CG>TA	CG>TA	AAAAAGCCTGCAA	CCTGCAA	CGG	GCC	C	A	C>T	C>T_GCC	CG>TA_CCTGCAA	4	1379	FALSE	FALSE
16_v.txt	32092	32092-SNV-C-T	SNV	1	C	T	42	26886	0.156215	60.3333	msh2	FALSE	CAN	JSY22	1	msh2-Rep1	GCA	C>T	A/T+1	G/C-1	CG>TA	CG>TA	AGCCTGCAACACC	CAACACC	CGT	GCA	C	A	C>T	C>T_GCA	CG>TA_CAACACC	4	1375	FALSE	FALSE
16_v.txt	32165	32165-SNV-G-A	SNV	1	G	A	29	26886	0.107863	44.4828	msh2	FALSE	CAN	JSY22	1	msh2-Rep1	CGC	G>A	A/T+1	G/C-1	CG>TA	CG>TA	CAAAGCGCCAAAT	GCCAAAT	GCG	GCG	C	T	C>T	C>T_GCG	CG>TA_GCCAAAT	4	1302	FALSE	FALSE
16_v.txt	32205	32205-SNV-C-T	SNV	1	C	T	192	26885	0.714153	41.026	msh2	FALSE	CAN	JSY22	1	msh2-Rep1	ACC	C>T	A/T+1	G/C-1	CG>TA	CG>TA	GGAACACCACCTT	CCACCTT	TGG	ACC	C	A	C>T	C>T_ACC	CG>TA_CCACCTT	4	1262	FALSE	FALSE
16_v.txt	32271	32271-SNV-C-T	SNV	1	C	T	46	34999	0.131432	35.3913	msh2	FALSE	CAN	JSY22	1	msh2-Rep1	ACG	C>T	A/T+1	G/C-1	CG>TA	CG>TA	AAAATACGGGAAC	CGGGAAC	TGC	ACG	C	A	C>T	C>T_ACG	CG>TA_CGGGAAC	4	1196	FALSE	FALSE
16_v.txt	32299	32299-SNV-C-T	SNV	1	C	T	76	34999	0.217149	49.8158	msh2	FALSE	CAN	JSY22	1	msh2-Rep1	GCG	C>T	A/T+1	G/C-1	CG>TA	CG>TA	AATTTGCGGCAGA	CGGCAGA	CGC	GCG	C	A	C>T	C>T_GCG	CG>TA_CGGCAGA	4	1168	FALSE	FALSE
16_v.txt	32466	32466-SNV-C-T	SNV	1	C	T	52	34999	0.148576	45.6731	msh2	FALSE	CAN	JSY22	1	msh2-Rep1	GCC	C>T	A/T+1	G/C-1	CG>TA	CG>TA	AGAGAGCCAATGT	CCAATGT	CGG	GCC	C	A	C>T	C>T_GCC	CG>TA_CCAATGT	4	1001	FALSE	FALSE
16_v.txt	32487	32487-SNV-C-T	SNV	1	C	T	952	34999	2.72008	46.9209	msh2	FALSE	CAN	JSY22	1	msh2-Rep1	ACG	C>T	A/T+1	G/C-1	CG>TA	CG>TA	AAGATACGGAAAA	CGGAAAA	TGC	ACG	C	A	C>T	C>T_ACG	CG>TA_CGGAAAA	4	980	FALSE	FALSE
16_v.txt	32488	32488-SNV-G-A	SNV	1	G	A	21	34999	0.0600017	28.1429	msh2	FALSE	CAN	JSY22	1	msh2-Rep1	CGG	G>A	A/T+1	G/C-1	CG>TA	CG>TA	AGATACGGAAAAC	GGAAAAC	GCC	GCC	C	T	C>T	C>T_GCC	CG>TA_GGAAAAC	4	979	FALSE	FALSE
16_v.txt	32529	32529-SNV-G-A	SNV	1	G	A	58	34999	0.165719	38.7586	msh2	FALSE	CAN	JSY22	1	msh2-Rep1	GGG	G>A	A/T+1	G/C-1	CG>TA	CG>TA	TTTCTGGGGTTTG	GGGTTTG	CCC	CCC	C	T	C>T	C>T_CCC	CG>TA_GGGTTTG	4	938	FALSE	FALSE
16_v.txt	32535	32535-SNV-G-A	SNV	1	G	A	46	34998	0.131436	36.2388	msh2	FALSE	CAN	JSY22	1	msh2-Rep1	TGC	G>A	A/T+1	G/C-1	CG>TA	CG>TA	GGGTTTGCAGCTT	GCAGCTT	ACG	ACG	C	T	C>T	C>T_ACG	CG>TA_GCAGCTT	4	932	FALSE	FALSE
16_v.txt	32536	32536-SNV-C-T	SNV	1	C	T	69	34998	0.197154	36.8986	msh2	FALSE	CAN	JSY22	1	msh2-Rep1	GCA	C>T	A/T+1	G/C-1	CG>TA	CG>TA	GGTTTGCAGCTTC	CAGCTTC	CGT	GCA	C	A	C>T	C>T_GCA	CG>TA_CAGCTTC	4	931	FALSE	FALSE
16_v.txt	32571	32571-SNV-C-T	SNV	1	C	T	48	32356	0.14835	34.0417	msh2	FALSE	CAN	JSY22	1	msh2-Rep1	ACC	C>T	A/T+1	G/C-1	CG>TA	CG>TA	TCAGTACCTTGAA	CCTTGAA	TGG	ACC	C	A	C>T	C>T_ACC	CG>TA_CCTTGAA	4	896	FALSE	FALSE
16_v.txt	32590	32590-SNV-C-T	SNV	1	C	T	55	32356	0.169984	36.6364	msh2	FALSE	CAN	JSY22	1	msh2-Rep1	GCG	C>T	A/T+1	G/C-1	CG>TA	CG>TA	AGGCAGCGTTAAT	CGTTAAT	CGC	GCG	C	A	C>T	C>T_GCG	CG>TA_CGTTAAT	4	877	FALSE	FALSE
16_v.txt	32679	32679-SNV-C-T	SNV	1	C	T	36	32354	0.111269	58.162	msh2	FALSE	CAN	JSY22	1	msh2-Rep1	CCA	C>T	A/T+1	G/C-1	CG>TA	CG>TA	TTTCTCCAATAAC	CAATAAC	GGT	CCA	C	A	C>T	C>T_CCA	CG>TA_CAATAAC	4	788	FALSE	FALSE
16_v.txt	32700	32700-SNV-C-T	SNV	1	C	T	40	32356	0.123625	60.975	msh2	FALSE	CAN	JSY22	1	msh2-Rep1	GCC	C>T	A/T+1	G/C-1	CG>TA	CG>TA	ACTGGGCCGGTAA	CCGGTAA	CGG	GCC	C	A	C>T	C>T_GCC	CG>TA_CCGGTAA	4	767	FALSE	FALSE
16_v.txt	32757	32757-SNV-G-A	SNV	1	G	A	27	32356	0.0834467	46.6667	msh2	FALSE	CAN	JSY22	1	msh2-Rep1	GGC	G>A	A/T+1	G/C-1	CG>TA	CG>TA	ATAATGGCTAAAA	GCTAAAA	CCG	CCG	C	T	C>T	C>T_CCG	CG>TA_GCTAAAA	4	710	FALSE	FALSE
16_v.txt	32776	32776-SNV-C-T	SNV	1	C	T	31	32356	0.0958091	51.8065	msh2	FALSE	CAN	JSY22	1	msh2-Rep1	GCG	C>T	A/T+1	G/C-1	CG>TA	CG>TA	TGGAAGCGACCCA	CGACCCA	CGC	GCG	C	A	C>T	C>T_GCG	CG>TA_CGACCCA	4	691	FALSE	FALSE
16_v.txt	32798	32798-SNV-G-A	SNV	1	G	A	39	32356	0.120534	43.1282	msh2	FALSE	CAN	JSY22	1	msh2-Rep1	CGT	G>A	A/T+1	G/C-1	CG>TA	CG>TA	TTCACCGTAATAT	GTAATAT	GCA	GCA	C	T	C>T	C>T_GCA	CG>TA_GTAATAT	4	669	FALSE	FALSE
16_v.txt	32840	32840-SNV-C-T	SNV	1	C	T	91	32356	0.281246	38.3736	msh2	FALSE	CAN	JSY22	1	msh2-Rep1	CCC	C>T	A/T+1	G/C-1	CG>TA	CG>TA	AATTACCCAAAAA	CCAAAAA	GGG	CCC	C	A	C>T	C>T_CCC	CG>TA_CCAAAAA	4	627	FALSE	FALSE
16_v.txt	32855	32855-SNV-C-T	SNV	1	C	T	88	32354	0.271991	36.8182	msh2	FALSE	CAN	JSY22	1	msh2-Rep1	TCC	C>T	A/T+1	G/C-1	CG>TA	CG>TA	ACTAATCCATGCC	CCATGCC	AGG	TCC	C	A	C>T	C>T_TCC	CG>TA_CCATGCC	4	612	FALSE	FALSE
16_v.txt	32860	32860-SNV-C-T	SNV	1	C	T	37	32352	0.114367	34.973	msh2	FALSE	CAN	JSY22	1	msh2-Rep1	GCC	C>T	A/T+1	G/C-1	CG>TA	CG>TA	TCCATGCCGCCAG	CCGCCAG	CGG	GCC	C	A	C>T	C>T_GCC	CG>TA_CCGCCAG	4	607	FALSE	FALSE
16_v.txt	32862	32862-SNV-G-A	SNV	1	G	A	28	32352	0.086548	35.9643	msh2	FALSE	CAN	JSY22	1	msh2-Rep1	CGC	G>A	A/T+1	G/C-1	CG>TA	CG>TA	CATGCCGCCAGTG	GCCAGTG	GCG	GCG	C	T	C>T	C>T_GCG	CG>TA_GCCAGTG	4	605	FALSE	FALSE
16_v.txt	32900	32900-SNV-G-A	SNV	1	G	A	44	33576	0.131046	34.6543	msh2	FALSE	CAN	JSY22	1	msh2-Rep1	GGC	G>A	A/T+1	G/C-1	CG>TA	CG>TA	GACTTGGCCAACT	GCCAACT	CCG	CCG	C	T	C>T	C>T_CCG	CG>TA_GCCAACT	4	567	FALSE	FALSE
16_v.txt	32901	32901-SNV-C-T	SNV	1	C	T	85	33576	0.253157	33.4239	msh2	FALSE	CAN	JSY22	1	msh2-Rep1	GCC	C>T	A/T+1	G/C-1	CG>TA	CG>TA	ACTTGGCCAACTA	CCAACTA	CGG	GCC	C	A	C>T	C>T_GCC	CG>TA_CCAACTA	4	566	FALSE	FALSE
16_v.txt	32917	32917-SNV-C-T	SNV	1	C	T	58	33576	0.172742	46.3793	msh2	FALSE	CAN	JSY22	1	msh2-Rep1	TCC	C>T	A/T+1	G/C-1	CG>TA	CG>TA	TAAGTTCCAGGGC	CCAGGGC	AGG	TCC	C	A	C>T	C>T_TCC	CG>TA_CCAGGGC	4	550	FALSE	FALSE
16_v.txt	32958	32958-SNV-C-T	SNV	1	C	T	70	33576	0.208482	54.7714	msh2	FALSE	CAN	JSY22	1	msh2-Rep1	ACC	C>T	A/T+1	G/C-1	CG>TA	CG>TA	ATGTAACCATTGG	CCATTGG	TGG	ACC	C	A	C>T	C>T_ACC	CG>TA_CCATTGG	4	509	FALSE	FALSE
16_v.txt	32965	32965-SNV-C-T	SNV	1	C	T	30	33576	0.0893495	57.8667	msh2	FALSE	CAN	JSY22	1	msh2-Rep1	GCC	C>T	A/T+1	G/C-1	CG>TA	CG>TA	CATTGGCCGCACC	CCGCACC	CGG	GCC	C	A	C>T	C>T_GCC	CG>TA_CCGCACC	4	502	FALSE	FALSE
16_v.txt	32967	32967-SNV-G-A	SNV	1	G	A	80	33576	0.238265	60.6875	msh2	FALSE	CAN	JSY22	1	msh2-Rep1	CGC	G>A	A/T+1	G/C-1	CG>TA	CG>TA	TTGGCCGCACCAA	GCACCAA	GCG	GCG	C	T	C>T	C>T_GCG	CG>TA_GCACCAA	4	500	FALSE	FALSE
16_v.txt	32977	32977-SNV-C-T	SNV	1	C	T	28	33576	0.0833929	59.0714	msh2	FALSE	CAN	JSY22	1	msh2-Rep1	GCT	C>T	A/T+1	G/C-1	CG>TA	CG>TA	CAAATGCTGGAGA	CTGGAGA	CGA	GCT	C	A	C>T	C>T_GCT	CG>TA_CTGGAGA	4	490	FALSE	FALSE
16_v.txt	33056	33056-SNV-C-T	SNV	1	C	T	33	33576	0.0982845	55.4848	msh2	FALSE	CAN	JSY22	1	msh2-Rep1	GCG	C>T	A/T+1	G/C-1	CG>TA	CG>TA	GGACTGCGTGACA	CGTGACA	CGC	GCG	C	A	C>T	C>T_GCG	CG>TA_CGTGACA	4	411	FALSE	FALSE
16_v.txt	33070	33070-SNV-C-T	SNV	1	C	T	32	33576	0.0953062	52.7812	msh2	FALSE	CAN	JSY22	1	msh2-Rep1	GCC	C>T	A/T+1	G/C-1	CG>TA	CG>TA	AATATGCCAAAGA	CCAAAGA	CGG	GCC	C	A	C>T	C>T_GCC	CG>TA_CCAAAGA	4	397	FALSE	FALSE
16_v.txt	33114	33114-SNV-C-T	SNV	1	C	T	24	33576	0.0714796	40.9583	msh2	FALSE	CAN	JSY22	1	msh2-Rep1	GCC	C>T	A/T+1	G/C-1	CG>TA	CG>TA	ACTGGGCCGGCGT	CCGGCGT	CGG	GCC	C	A	C>T	C>T_GCC	CG>TA_CCGGCGT	4	353	FALSE	FALSE
16_v.txt	33118	33118-SNV-C-T	SNV	1	C	T	33	33576	0.0982845	41.8254	msh2	FALSE	CAN	JSY22	1	msh2-Rep1	GCG	C>T	A/T+1	G/C-1	CG>TA	CG>TA	GGCCGGCGTTGGT	CGTTGGT	CGC	GCG	C	A	C>T	C>T_GCG	CG>TA_CGTTGGT	4	349	FALSE	FALSE
16_v.txt	33119	33119-SNV-G-A	SNV	1	G	A	29	33576	0.0863712	47.8627	msh2	FALSE	CAN	JSY22	1	msh2-Rep1	CGT	G>A	A/T+1	G/C-1	CG>TA	CG>TA	GCCGGCGTTGGTC	GTTGGTC	GCA	GCA	C	T	C>T	C>T_GCA	CG>TA_GTTGGTC	4	348	FALSE	FALSE
16_v.txt	33130	33130-SNV-G-A	SNV	1	G	A	3	33576	0.008935	36.6661	msh2	FALSE	CAN	JSY22	1	msh2-Rep1	GGT	G>A	A/T+1	G/C-1	CG>TA	CG>TA	TCAGAGGTGTGGA	GTGTGGA	CCA	CCA	C	T	C>T	C>T_CCA	CG>TA_GTGTGGA	4	337	FALSE	FALSE
16_v.txt	33168	33168-SNV-C-T	SNV	1	C	T	39	33575	0.116158	36.8462	msh2	FALSE	CAN	JSY22	1	msh2-Rep1	ACC	C>T	A/T+1	G/C-1	CG>TA	CG>TA	ATAGTACCACCAA	CCACCAA	TGG	ACC	C	A	C>T	C>T_ACC	CG>TA_CCACCAA	4	299	FALSE	FALSE
16_v.txt	33205	33205-SNV-G-A	SNV	1	G	A	7	19792	0.0353678	36	msh2	FALSE	CAN	JSY22	1	msh2-Rep1	AGC	G>A	A/T+1	G/C-1	CG>TA	CG>TA	GCTTAAGCTCTCT	GCTCTCT	TCG	TCG	C	T	C>T	C>T_TCG	CG>TA_GCTCTCT	4	262	FALSE	FALSE
16_v.txt	33229	33229-SNV-G-A	SNV	1	G	A	24	19792	0.121261	36.5	msh2	FALSE	CAN	JSY22	1	msh2-Rep1	TGT	G>A	A/T+1	G/C-1	CG>TA	CG>TA	CGTTCTGTACTTC	GTACTTC	ACA	ACA	C	T	C>T	C>T_ACA	CG>TA_GTACTTC	4	238	FALSE	FALSE
16_v.txt	33258	33258-SNV-C-T	SNV	1	C	T	21	19792	0.106103	39.4762	msh2	FALSE	CAN	JSY22	1	msh2-Rep1	GCC	C>T	A/T+1	G/C-1	CG>TA	CG>TA	CCTATGCCATCCT	CCATCCT	CGG	GCC	C	A	C>T	C>T_GCC	CG>TA_CCATCCT	4	209	FALSE	FALSE
16_v.txt	33275	33275-SNV-C-T	SNV	1	C	T	21	19792	0.106103	53.2381	msh2	FALSE	CAN	JSY22	1	msh2-Rep1	ACG	C>T	A/T+1	G/C-1	CG>TA	CG>TA	AGAGAACGTATCC	CGTATCC	TGC	ACG	C	A	C>T	C>T_ACG	CG>TA_CGTATCC	4	192	FALSE	FALSE
16_v.txt	33276	33276-SNV-G-A	SNV	1	G	A	35	19792	0.176839	42.1684	msh2	FALSE	CAN	JSY22	1	msh2-Rep1	CGT	G>A	A/T+1	G/C-1	CG>TA	CG>TA	GAGAACGTATCCT	GTATCCT	GCA	GCA	C	T	C>T	C>T_GCA	CG>TA_GTATCCT	4	191	FALSE	FALSE
16_v.txt	33309	33309-SNV-C-T	SNV	1	C	T	28	19792	0.141471	54.8496	msh2	FALSE	CAN	JSY22	1	msh2-Rep1	GCG	C>T	A/T+1	G/C-1	CG>TA	CG>TA	AAAGAGCGCAATG	CGCAATG	CGC	GCG	C	A	C>T	C>T_GCG	CG>TA_CGCAATG	4	158	FALSE	FALSE
16_v.txt	33310	33310-SNV-G-A	SNV	1	G	A	25	19790	0.126326	55.6319	msh2	FALSE	CAN	JSY22	1	msh2-Rep1	CGC	G>A	A/T+1	G/C-1	CG>TA	CG>TA	AAGAGCGCAATGG	GCAATGG	GCG	GCG	C	T	C>T	C>T_GCG	CG>TA_GCAATGG	4	157	FALSE	FALSE
16_v.txt	33392	33392-SNV-G-A	SNV	1	G	A	26	19792	0.131366	49.3077	msh2	FALSE	CAN	JSY22	1	msh2-Rep1	CGT	G>A	A/T+1	G/C-1	CG>TA	CG>TA	AACGTCGTGAAAG	GTGAAAG	GCA	GCA	C	T	C>T	C>T_GCA	CG>TA_GTGAAAG	4	75	FALSE	FALSE
16_v.txt	33412	33412-SNV-G-A	SNV	1	G	A	28	19792	0.141471	45.0714	msh2	FALSE	CAN	JSY22	1	msh2-Rep1	GGC	G>A	A/T+1	G/C-1	CG>TA	CG>TA	TGACCGGCTCATT	GCTCATT	CCG	CCG	C	T	C>T	C>T_CCG	CG>TA_GCTCATT	4	55	FALSE	FALSE
16_v.txt	33474	33474-SNV-C-T	SNV	1	C	T	26	19792	0.131366	33.5	msh2	FALSE	CAN	JSY22	1	msh2-Rep1	GCC	C>T	A/T+1	G/C-1	CG>TA	CG>TA	GCTATGCCTTTTT	CCTTTTT	CGG	GCC	C	A	C>T	C>T_GCC	CG>TA_CCTTTTT	4	N_A	FALSE	FALSE
16_v.txt	31882	31882-SNV-C-G	SNV	1	C	G	3	16169	0.018554	33	msh2	FALSE	CAN	JSY22	1	msh2-Rep1	GCA	C>G	G/C+1	G/C-1	CG>GC	CG>GC	AGGCGGCAGCAAA	CAGCAAA	CGT	GCA	C	C	C>G	C>G_GCA	CG>GC_CAGCAAA	4	1585	FALSE	FALSE
16_v.txt	31980	31980-SNV-G-C	SNV	1	G	C	2	26886	0.007439	41.4929	msh2	FALSE	CAN	JSY22	1	msh2-Rep1	GGG	G>C	G/C+1	G/C-1	CG>GC	CG>GC	AAGCCGGGCATTA	GGCATTA	CCC	CCC	C	G	C>G	C>G_CCC	CG>GC_GGCATTA	4	1487	FALSE	FALSE
16_v.txt	33114	33114-SNV-C-G	SNV	1	C	G	10	33576	0.0297832	47.6	msh2	FALSE	CAN	JSY22	1	msh2-Rep1	GCC	C>G	G/C+1	G/C-1	CG>GC	CG>GC	ACTGGGCCGGCGT	CCGGCGT	CGG	GCC	C	C	C>G	C>G_GCC	CG>GC_CCGGCGT	4	353	FALSE	FALSE
16_v.txt	33168	33168-SNV-C-G	SNV	1	C	G	3	33575	0.008935	34.0001	msh2	FALSE	CAN	JSY22	1	msh2-Rep1	ACC	C>G	G/C+1	G/C-1	CG>GC	CG>GC	ATAGTACCACCAA	CCACCAA	TGG	ACC	C	C	C>G	C>G_ACC	CG>GC_CCACCAA	4	299	FALSE	FALSE
16_v.txt	33310	33310-SNV-G-C	SNV	1	G	C	4	19790	0.0202122	28.0038	msh2	FALSE	CAN	JSY22	1	msh2-Rep1	CGC	G>C	G/C+1	G/C-1	CG>GC	CG>GC	AAGAGCGCAATGG	GCAATGG	GCG	GCG	C	G	C>G	C>G_GCG	CG>GC_GCAATGG	4	157	FALSE	FALSE
16_v.txt	33392	33392-SNV-G-C	SNV	1	G	C	3	19792	0.0151576	44.3333	msh2	FALSE	CAN	JSY22	1	msh2-Rep1	CGT	G>C	G/C+1	G/C-1	CG>GC	CG>GC	AACGTCGTGAAAG	GTGAAAG	GCA	GCA	C	G	C>G	C>G_GCA	CG>GC_GTGAAAG	4	75	FALSE	FALSE
16_v.txt	31657	31657-SNV-G-T	SNV	1	G	T	125	16169	0.773084	18.0931	msh2	FALSE	CAN	JSY22	1	msh2-Rep1	GGC	G>T	A/T+1	G/C-1	CG>AT	CG>AT	GAAATGGCGTGGA	GCGTGGA	CCG	CCG	C	A	C>A	C>A_CCG	CG>AT_GCGTGGA	4	1810	FALSE	FALSE
16_v.txt	31912	31912-SNV-C-A	SNV	1	C	A	5	16169	0.0309234	31.6	msh2	FALSE	CAN	JSY22	1	msh2-Rep1	GCA	C>A	A/T+1	G/C-1	CG>AT	CG>AT	TTGGTGCAAAAGC	CAAAAGC	CGT	GCA	C	T	C>A	C>A_GCA	CG>AT_CAAAAGC	4	1555	FALSE	FALSE
16_v.txt	31980	31980-SNV-G-T	SNV	1	G	T	25	26886	0.0929852	47.2305	msh2	FALSE	CAN	JSY22	1	msh2-Rep1	GGG	G>T	A/T+1	G/C-1	CG>AT	CG>AT	AAGCCGGGCATTA	GGCATTA	CCC	CCC	C	A	C>A	C>A_CCC	CG>AT_GGCATTA	4	1487	FALSE	FALSE
16_v.txt	31981	31981-SNV-G-T	SNV	1	G	T	31	26886	0.115302	31.8023	msh2	FALSE	CAN	JSY22	1	msh2-Rep1	GGC	G>T	A/T+1	G/C-1	CG>AT	CG>AT	AGCCGGGCATTAA	GCATTAA	CCG	CCG	C	A	C>A	C>A_CCG	CG>AT_GCATTAA	4	1486	FALSE	FALSE
16_v.txt	32088	32088-SNV-C-A	SNV	1	C	A	5	26886	0.018597	33.9982	msh2	FALSE	CAN	JSY22	1	msh2-Rep1	GCC	C>A	A/T+1	G/C-1	CG>AT	CG>AT	AAAAAGCCTGCAA	CCTGCAA	CGG	GCC	C	T	C>A	C>A_GCC	CG>AT_CCTGCAA	4	1379	FALSE	FALSE
16_v.txt	32089	32089-SNV-C-A	SNV	1	C	A	71	26883	0.264107	58.6764	msh2	FALSE	CAN	JSY22	1	msh2-Rep1	CCT	C>A	A/T+1	G/C-1	CG>AT	CG>AT	AAAAGCCTGCAAC	CTGCAAC	GGA	CCT	C	T	C>A	C>A_CCT	CG>AT_CTGCAAC	4	1378	FALSE	FALSE
16_v.txt	32188	32188-SNV-C-A	SNV	1	C	A	24	26886	0.0892658	36.7917	msh2	FALSE	CAN	JSY22	1	msh2-Rep1	ACT	C>A	A/T+1	G/C-1	CG>AT	CG>AT	CGAAAACTGCAAT	CTGCAAT	TGA	ACT	C	T	C>A	C>A_ACT	CG>AT_CTGCAAT	4	1279	FALSE	FALSE
16_v.txt	32272	32272-SNV-G-T	SNV	1	G	T	41	34999	0.117146	36.2674	msh2	FALSE	CAN	JSY22	1	msh2-Rep1	CGG	G>T	A/T+1	G/C-1	CG>AT	CG>AT	AAATACGGGAACC	GGGAACC	GCC	GCC	C	A	C>A	C>A_GCC	CG>AT_GGGAACC	4	1195	FALSE	FALSE
16_v.txt	32274	32274-SNV-G-T	SNV	1	G	T	235	34999	0.671448	36.3489	msh2	FALSE	CAN	JSY22	1	msh2-Rep1	GGA	G>T	A/T+1	G/C-1	CG>AT	CG>AT	ATACGGGAACCAA	GAACCAA	CCT	CCT	C	A	C>A	C>A_CCT	CG>AT_GAACCAA	4	1193	FALSE	FALSE
16_v.txt	32373	32373-SNV-G-T	SNV	1	G	T	66	34999	0.188577	58.4242	msh2	FALSE	CAN	JSY22	1	msh2-Rep1	AGC	G>T	A/T+1	G/C-1	CG>AT	CG>AT	TCAATAGCAATAA	GCAATAA	TCG	TCG	C	A	C>A	C>A_TCG	CG>AT_GCAATAA	4	1094	FALSE	FALSE
16_v.txt	32432	32432-SNV-G-T	SNV	1	G	T	38	34999	0.108575	54.2632	msh2	FALSE	CAN	JSY22	1	msh2-Rep1	TGT	G>T	A/T+1	G/C-1	CG>AT	CG>AT	GTCATTGTATGGA	GTATGGA	ACA	ACA	C	A	C>A	C>A_ACA	CG>AT_GTATGGA	4	1035	FALSE	FALSE
16_v.txt	32487	32487-SNV-C-A	SNV	1	C	A	12	34999	0.0342867	53.1407	msh2	FALSE	CAN	JSY22	1	msh2-Rep1	ACG	C>A	A/T+1	G/C-1	CG>AT	CG>AT	AAGATACGGAAAA	CGGAAAA	TGC	ACG	C	T	C>A	C>A_ACG	CG>AT_CGGAAAA	4	980	FALSE	FALSE
16_v.txt	32488	32488-SNV-G-T	SNV	1	G	T	35	34999	0.100003	42.1714	msh2	FALSE	CAN	JSY22	1	msh2-Rep1	CGG	G>T	A/T+1	G/C-1	CG>AT	CG>AT	AGATACGGAAAAC	GGAAAAC	GCC	GCC	C	A	C>A	C>A_GCC	CG>AT_GGAAAAC	4	979	FALSE	FALSE
16_v.txt	32529	32529-SNV-G-T	SNV	1	G	T	25	34999	0.0714306	42.3593	msh2	FALSE	CAN	JSY22	1	msh2-Rep1	GGG	G>T	A/T+1	G/C-1	CG>AT	CG>AT	TTTCTGGGGTTTG	GGGTTTG	CCC	CCC	C	A	C>A	C>A_CCC	CG>AT_GGGTTTG	4	938	FALSE	FALSE
16_v.txt	32530	32530-SNV-G-T	SNV	1	G	T	73	34999	0.208577	37.8205	msh2	FALSE	CAN	JSY22	1	msh2-Rep1	GGG	G>T	A/T+1	G/C-1	CG>AT	CG>AT	TTCTGGGGTTTGC	GGTTTGC	CCC	CCC	C	A	C>A	C>A_CCC	CG>AT_GGTTTGC	4	937	FALSE	FALSE
16_v.txt	32536	32536-SNV-C-A	SNV	1	C	A	8	34998	0.0228584	23.125	msh2	FALSE	CAN	JSY22	1	msh2-Rep1	GCA	C>A	A/T+1	G/C-1	CG>AT	CG>AT	GGTTTGCAGCTTC	CAGCTTC	CGT	GCA	C	T	C>A	C>A_GCA	CG>AT_CAGCTTC	4	931	FALSE	FALSE
16_v.txt	32840	32840-SNV-C-A	SNV	1	C	A	6	32356	0.0185437	42	msh2	FALSE	CAN	JSY22	1	msh2-Rep1	CCC	C>A	A/T+1	G/C-1	CG>AT	CG>AT	AATTACCCAAAAA	CCAAAAA	GGG	CCC	C	T	C>A	C>A_CCC	CG>AT_CCAAAAA	4	627	FALSE	FALSE
16_v.txt	32900	32900-SNV-G-T	SNV	1	G	T	16	33576	0.0476531	19.7497	msh2	FALSE	CAN	JSY22	1	msh2-Rep1	GGC	G>T	A/T+1	G/C-1	CG>AT	CG>AT	GACTTGGCCAACT	GCCAACT	CCG	CCG	C	A	C>A	C>A_CCG	CG>AT_GCCAACT	4	567	FALSE	FALSE
16_v.txt	32917	32917-SNV-C-A	SNV	1	C	A	17	33576	0.0506314	45.2941	msh2	FALSE	CAN	JSY22	1	msh2-Rep1	TCC	C>A	A/T+1	G/C-1	CG>AT	CG>AT	TAAGTTCCAGGGC	CCAGGGC	AGG	TCC	C	T	C>A	C>A_TCC	CG>AT_CCAGGGC	4	550	FALSE	FALSE
16_v.txt	32940	32940-SNV-G-T	SNV	1	G	T	38	33576	0.113176	42.2099	msh2	FALSE	CAN	JSY22	1	msh2-Rep1	AGA	G>T	A/T+1	G/C-1	CG>AT	CG>AT	GCCCAAGAAAACC	GAAAACC	TCT	TCT	C	A	C>A	C>A_TCT	CG>AT_GAAAACC	4	527	FALSE	FALSE
16_v.txt	33118	33118-SNV-C-A	SNV	1	C	A	5	33576	0.0148916	42.5895	msh2	FALSE	CAN	JSY22	1	msh2-Rep1	GCG	C>A	A/T+1	G/C-1	CG>AT	CG>AT	GGCCGGCGTTGGT	CGTTGGT	CGC	GCG	C	T	C>A	C>A_GCG	CG>AT_CGTTGGT	4	349	FALSE	FALSE
16_v.txt	33154	33154-SNV-C-A	SNV	1	C	A	260	33576	0.774363	37.0269	msh2	FALSE	CAN	JSY22	1	msh2-Rep1	CCT	C>A	A/T+1	G/C-1	CG>AT	CG>AT	AAAGACCTGTACC	CTGTACC	GGA	CCT	C	T	C>A	C>A_CCT	CG>AT_CTGTACC	4	313	FALSE	FALSE
16_v.txt	33168	33168-SNV-C-A	SNV	1	C	A	13	33575	0.0387193	36.9231	msh2	FALSE	CAN	JSY22	1	msh2-Rep1	ACC	C>A	A/T+1	G/C-1	CG>AT	CG>AT	ATAGTACCACCAA	CCACCAA	TGG	ACC	C	T	C>A	C>A_ACC	CG>AT_CCACCAA	4	299	FALSE	FALSE
16_v.txt	33169	33169-SNV-C-A	SNV	1	C	A	34	33575	0.101266	36.7942	msh2	FALSE	CAN	JSY22	1	msh2-Rep1	CCA	C>A	A/T+1	G/C-1	CG>AT	CG>AT	TAGTACCACCAAG	CACCAAG	GGT	CCA	C	T	C>A	C>A_CCA	CG>AT_CACCAAG	4	298	FALSE	FALSE
16_v.txt	33193	33193-SNV-G-T	SNV	1	G	T	15	19792	0.0757882	33.2	msh2	FALSE	CAN	JSY22	1	msh2-Rep1	TGT	G>T	A/T+1	G/C-1	CG>AT	CG>AT	CAATATGTCTTTG	GTCTTTG	ACA	ACA	C	A	C>A	C>A_ACA	CG>AT_GTCTTTG	4	274	FALSE	FALSE
16_v.txt	33205	33205-SNV-G-T	SNV	1	G	T	77	19792	0.389046	39.6623	msh2	FALSE	CAN	JSY22	1	msh2-Rep1	AGC	G>T	A/T+1	G/C-1	CG>AT	CG>AT	GCTTAAGCTCTCT	GCTCTCT	TCG	TCG	C	A	C>A	C>A_TCG	CG>AT_GCTCTCT	4	262	FALSE	FALSE
16_v.txt	33208	33208-SNV-C-A	SNV	1	C	A	129	19792	0.651778	38.7829	msh2	FALSE	CAN	JSY22	1	msh2-Rep1	TCT	C>A	A/T+1	G/C-1	CG>AT	CG>AT	TAAGCTCTCTCTT	CTCTCTT	AGA	TCT	C	T	C>A	C>A_TCT	CG>AT_CTCTCTT	4	259	FALSE	FALSE
16_v.txt	33238	33238-SNV-C-A	SNV	1	C	A	16	19792	0.0808407	37.5625	msh2	FALSE	CAN	JSY22	1	msh2-Rep1	CCT	C>A	A/T+1	G/C-1	CG>AT	CG>AT	CTTCTCCTTCATC	CTTCATC	GGA	CCT	C	T	C>A	C>A_CCT	CG>AT_CTTCATC	4	229	FALSE	FALSE
16_v.txt	33247	33247-SNV-C-A	SNV	1	C	A	13	19792	0.0656831	35.7692	msh2	FALSE	CAN	JSY22	1	msh2-Rep1	TCA	C>A	A/T+1	G/C-1	CG>AT	CG>AT	CATCTTCATCACC	CATCACC	AGT	TCA	C	T	C>A	C>A_TCA	CG>AT_CATCACC	4	220	FALSE	FALSE
16_v.txt	33474	33474-SNV-C-A	SNV	1	C	A	63	19792	0.31831	32.8254	msh2	FALSE	CAN	JSY22	1	msh2-Rep1	GCC	C>A	A/T+1	G/C-1	CG>AT	CG>AT	GCTATGCCTTTTT	CCTTTTT	CGG	GCC	C	T	C>A	C>A_GCC	CG>AT_CCTTTTT	4	N_A	FALSE	FALSE
16_v.txt	32271	32271-Replacement-CG-T	Replacement	2	CG	T	1	34999	0.002857	38	msh2	FALSE	CAN	JSY22	1	msh2-Rep1	ACG	nope	A/T+1	>1bpdel	none	Replac.	AAAATACGGGAAC	CGGGAAC	TGC	ACG	CG	A	NA	NA_ACG	Replac._CGGGAAC	4	1196	FALSE	FALSE
16_v.txt	33205	33205-Replacement-G-ACT	Replacement	3	G	ACT	1	19792	0.005053	38	msh2	FALSE	CAN	JSY22	1	msh2-Rep1	AGC	nope	>1bp-ins	G/C-1	none	Replac.	GCTTAAGCTCTCT	GCTCTCT	TCG	TCG	C	none	C>none	C>none_TCG	Replac._GCTCTCT	4	262	FALSE	FALSE
16_v.txt	32487	32487-MNV-CG-TA	MNV	2	CG	TA	1	34999	0.002857	38	msh2	FALSE	CAN	JSY22	1	msh2-Rep1	ACG	nope	>1bp-ins	>1bpdel	none	MNV	AAGATACGGAAAA	CGGAAAA	TGC	ACG	CG	none	NA	NA_ACG	MNV_CGGAAAA	4	980	FALSE	FALSE
16_v.txt	32839	32839-MNV-CC-AA	MNV	2	CC	AA	1	32356	0.003091	31	msh2	FALSE	CAN	JSY22	1	msh2-Rep1	ACC	nope	>1bp-ins	>1bpdel	none	MNV	TAATTACCCAAAA	CCCAAAA	TGG	ACC	CC	none	NA	NA_ACC	MNV_CCCAAAA	4	628	FALSE	FALSE
16_v.txt	31913	31913-Insertion---A	Insertion	1	-	A	1	16169	0.006185	38	msh2	FALSE	CAN	JSY22	1	msh2-Rep1	CAA	nope	A/T+1	>1bpdel	none	A/T+1	TGGTGCAAAAGCC	AAAAGCC	GTT	CAA	-	T	NA	NA_CAA	A/T+1_AAAAGCC	4	1554	FALSE	FALSE
16_v.txt	32081	32081-Insertion---A	Insertion	1	-	A	465	26886	1.72952	63.4086	msh2	FALSE	CAN	JSY22	1	msh2-Rep1	CAA	nope	A/T+1	>1bpdel	none	A/T+1	CCATGCAAAAAAG	AAAAAAG	GTT	CAA	-	T	NA	NA_CAA	A/T+1_AAAAAAG	4	1386	FALSE	FALSE
16_v.txt	32081	32081-Insertion---AA	Insertion	2	-	AA	2	26886	0.007439	63.25	msh2	FALSE	CAN	JSY22	1	msh2-Rep1	CAA	nope	>1bp-ins	>1bpdel	none	>1bp-ins	CCATGCAAAAAAG	AAAAAAG	GTT	CAA	-	none	NA	NA_CAA	>1bp-ins_AAAAAAG	4	1386	FALSE	FALSE
16_v.txt	32087	32087-Insertion---G	Insertion	1	-	G	2	26886	0.007439	50	msh2	FALSE	CAN	JSY22	1	msh2-Rep1	AGC	nope	G/C+1	>1bpdel	none	G/C+1	AAAAAAGCCTGCA	GCCTGCA	TCG	AGC	-	C	NA	NA_AGC	G/C+1_GCCTGCA	4	1380	FALSE	FALSE
16_v.txt	32120	32120-Insertion---A	Insertion	1	-	A	7	26886	0.0260359	64	msh2	FALSE	CAN	JSY22	1	msh2-Rep1	CGA	nope	A/T+1	>1bpdel	none	A/T+1	CCATTCGAAAACT	GAAAACT	GCT	CGA	-	T	NA	NA_CGA	A/T+1_GAAAACT	4	1347	FALSE	FALSE
16_v.txt	32121	32121-Insertion---A	Insertion	1	-	A	16	26886	0.0595105	56.625	msh2	FALSE	CAN	JSY22	1	msh2-Rep1	GAA	nope	A/T+1	>1bpdel	none	A/T+1	CATTCGAAAACTT	AAAACTT	CTT	GAA	-	T	NA	NA_GAA	A/T+1_AAAACTT	4	1346	FALSE	FALSE
16_v.txt	32157	32157-Insertion---GCCAAAGC	Insertion	8	-	GCCAAAGC	9	26886	0.0334747	50.5694	msh2	FALSE	CAN	JSY22	1	msh2-Rep1	AGC	nope	>1bp-ins	>1bpdel	none	>1bp-ins	ATGTAAGCCAAAG	GCCAAAG	TCG	AGC	-	none	NA	NA_AGC	>1bp-ins_GCCAAAG	4	1310	FALSE	FALSE
16_v.txt	32450	32450-Insertion---A	Insertion	1	-	A	22	34999	0.0628589	46.5455	msh2	FALSE	CAN	JSY22	1	msh2-Rep1	CAA	nope	A/T+1	>1bpdel	none	A/T+1	AAGTCCAATGAAT	AATGAAT	GTT	CAA	-	T	NA	NA_CAA	A/T+1_AATGAAT	4	1017	FALSE	FALSE
16_v.txt	32498	32498-Insertion---T	Insertion	1	-	T	14	34999	0.0400011	41.5	msh2	FALSE	CAN	JSY22	1	msh2-Rep1	CTT	nope	A/T+1	>1bpdel	none	A/T+1	AACAACTTTTTTG	TTTTTTG	GAA	CTT	-	A	NA	NA_CTT	A/T+1_TTTTTTG	4	969	FALSE	FALSE
16_v.txt	32503	32503-Insertion---G	Insertion	1	-	G	2	34999	0.005714	38	msh2	FALSE	CAN	JSY22	1	msh2-Rep1	TTG	nope	G/C+1	>1bpdel	none	G/C+1	CTTTTTTGATGGC	TGATGGC	AAC	TTG	-	C	NA	NA_TTG	G/C+1_TGATGGC	4	964	FALSE	FALSE
16_v.txt	32528	32528-Insertion---G	Insertion	1	-	G	34	34999	0.0971456	40.5882	msh2	FALSE	CAN	JSY22	1	msh2-Rep1	TGG	nope	G/C+1	>1bpdel	none	G/C+1	TTTTCTGGGGTTT	GGGGTTT	ACC	TGG	-	C	NA	NA_TGG	G/C+1_GGGGTTT	4	939	FALSE	FALSE
16_v.txt	32532	32532-Insertion---T	Insertion	1	-	T	3	34999	0.008572	46.6667	msh2	FALSE	CAN	JSY22	1	msh2-Rep1	GTT	nope	A/T+1	>1bpdel	none	A/T+1	CTGGGGTTTGCAG	TTTGCAG	CAA	GTT	-	A	NA	NA_GTT	A/T+1_TTTGCAG	4	935	FALSE	FALSE
16_v.txt	32631	32631-Insertion---T	Insertion	1	-	T	10	32356	0.0309062	56.1	msh2	FALSE	CAN	JSY22	1	msh2-Rep1	GTT	nope	A/T+1	>1bpdel	none	A/T+1	CCTTCGTTTTTAT	TTTTTAT	CAA	GTT	-	A	NA	NA_GTT	A/T+1_TTTTTAT	4	836	FALSE	FALSE
16_v.txt	32728	32728-Insertion---A	Insertion	1	-	A	17	32356	0.0525405	61	msh2	FALSE	CAN	JSY22	1	msh2-Rep1	CAA	nope	A/T+1	>1bpdel	none	A/T+1	CCATACAAAAACA	AAAAACA	GTT	CAA	-	T	NA	NA_CAA	A/T+1_AAAAACA	4	739	FALSE	FALSE
16_v.txt	32842	32842-Insertion---A	Insertion	1	-	A	620	32356	1.91618	42.279	msh2	FALSE	CAN	JSY22	1	msh2-Rep1	CAA	nope	A/T+1	>1bpdel	none	A/T+1	TTACCCAAAAAAT	AAAAAAT	GTT	CAA	-	T	NA	NA_CAA	A/T+1_AAAAAAT	4	625	FALSE	FALSE
16_v.txt	32842	32842-Insertion---AA	Insertion	2	-	AA	1	32356	0.003091	37	msh2	FALSE	CAN	JSY22	1	msh2-Rep1	CAA	nope	>1bp-ins	>1bpdel	none	>1bp-ins	TTACCCAAAAAAT	AAAAAAT	GTT	CAA	-	none	NA	NA_CAA	>1bp-ins_AAAAAAT	4	625	FALSE	FALSE
16_v.txt	32884	32884-Insertion---A	Insertion	1	-	A	5	33576	0.0148916	38	msh2	FALSE	CAN	JSY22	1	msh2-Rep1	CAA	nope	A/T+1	>1bpdel	none	A/T+1	ACGTCCAAAATTG	AAAATTG	GTT	CAA	-	T	NA	NA_CAA	A/T+1_AAAATTG	4	583	FALSE	FALSE
16_v.txt	32961	32961-Insertion---T	Insertion	1	-	T	17	33576	0.0506314	52.2941	msh2	FALSE	CAN	JSY22	1	msh2-Rep1	ATT	nope	A/T+1	>1bpdel	none	A/T+1	TAACCATTGGCCG	TTGGCCG	TAA	ATT	-	A	NA	NA_ATT	A/T+1_TTGGCCG	4	506	FALSE	FALSE
16_v.txt	33206	33206-Insertion---CT	Insertion	2	-	CT	31	19792	0.156629	37.7581	msh2	FALSE	CAN	JSY22	1	msh2-Rep1	GCT	nope	>1bp-ins	>1bpdel	none	>1bp-ins	CTTAAGCTCTCTC	CTCTCTC	CGA	GCT	-	none	NA	NA_GCT	>1bp-ins_CTCTCTC	4	261	FALSE	FALSE
16_v.txt	33341	33341-Insertion---T	Insertion	1	-	T	4	19792	0.0202102	64	msh2	FALSE	CAN	JSY22	1	msh2-Rep1	CTT	nope	A/T+1	>1bpdel	none	A/T+1	CTCATCTTTCAAT	TTTCAAT	GAA	CTT	-	A	NA	NA_CTT	A/T+1_TTTCAAT	4	126	FALSE	FALSE
16_v.txt	33130	33130-Deletion-GT--	Deletion	2	GT	-	17	33576	0.0506314	40.7059	msh2	FALSE	CAN	JSY22	1	msh2-Rep1	GGT	nope	>1bp-ins	>1bpdel	none	>1bpdel	TCAGAGGTGTGGA	GTGTGGA	CCA	GGT	GT	none	NA	NA_GGT	>1bpdel_GTGTGGA	4	337	FALSE	FALSE
16_v.txt	31723	31723-Deletion-A--	Deletion	1	A	-	17	16169	0.105139	59.2353	msh2	FALSE	CAN	JSY22	1	msh2-Rep1	CAA	nope	>1bp-ins	A/T-1	none	A/T-1	TGTCCCAAAAAGT	AAAAAGT	GTT	GTT	T	none	T>none	T>none_GTT	A/T-1_AAAAAGT	4	1744	FALSE	FALSE
16_v.txt	31846	31846-Deletion-A--	Deletion	1	A	-	8	16169	0.0494774	54.125	msh2	FALSE	CAN	JSY22	1	msh2-Rep1	CAA	nope	>1bp-ins	A/T-1	none	A/T-1	AGATCCAAACAGC	AAACAGC	GTT	GTT	T	none	T>none	T>none_GTT	A/T-1_AAACAGC	4	1621	FALSE	FALSE
16_v.txt	31863	31863-Deletion-A--	Deletion	1	A	-	51	16169	0.315418	45.451	msh2	FALSE	CAN	JSY22	1	msh2-Rep1	GAA	nope	>1bp-ins	A/T-1	none	A/T-1	AACAGGAAAATAG	AAAATAG	CTT	CTT	T	none	T>none	T>none_CTT	A/T-1_AAAATAG	4	1604	FALSE	FALSE
16_v.txt	31913	31913-Deletion-A--	Deletion	1	A	-	30	16169	0.18554	38.7	msh2	FALSE	CAN	JSY22	1	msh2-Rep1	CAA	nope	>1bp-ins	A/T-1	none	A/T-1	TGGTGCAAAAGCC	AAAAGCC	GTT	GTT	T	none	T>none	T>none_GTT	A/T-1_AAAAGCC	4	1554	FALSE	FALSE
16_v.txt	31923	31923-Deletion-A--	Deletion	1	A	-	678	16169	4.19321	37.3097	msh2	FALSE	CAN	JSY22	1	msh2-Rep1	GAA	nope	>1bp-ins	A/T-1	none	A/T-1	GCCGTGAAACCTT	AAACCTT	CTT	CTT	T	none	T>none	T>none_CTT	A/T-1_AAACCTT	4	1544	FALSE	FALSE
16_v.txt	31972	31972-Deletion-C--	Deletion	1	C	-	6	26886	0.0223164	34.6667	msh2	FALSE	CAN	JSY22	1	msh2-Rep1	GCC	nope	>1bp-ins	G/C-1	none	G/C-1	AATAAGCCAAGCC	CCAAGCC	CGG	GCC	C	none	nope	nope_GCC	G/C-1_CCAAGCC	4	1495	FALSE	FALSE
16_v.txt	31979	31979-Deletion-G--	Deletion	1	G	-	18	26886	0.0669493	38.0556	msh2	FALSE	CAN	JSY22	1	msh2-Rep1	CGG	nope	>1bp-ins	G/C-1	none	G/C-1	CAAGCCGGGCATT	GGGCATT	GCC	GCC	C	none	C>none	C>none_GCC	G/C-1_GGGCATT	4	1488	FALSE	FALSE
16_v.txt	32004	32004-Deletion-A--	Deletion	1	A	-	12	26886	0.0446329	50.25	msh2	FALSE	CAN	JSY22	1	msh2-Rep1	TAA	nope	>1bp-ins	A/T-1	none	A/T-1	AATGGTAACTCGT	AACTCGT	ATT	ATT	T	none	T>none	T>none_ATT	A/T-1_AACTCGT	4	1463	FALSE	FALSE
16_v.txt	32054	32054-Deletion-G--	Deletion	1	G	-	17	26886	0.0632299	63.8235	msh2	FALSE	CAN	JSY22	1	msh2-Rep1	TGT	nope	>1bp-ins	G/C-1	none	G/C-1	TCTGATGTGCGAG	GTGCGAG	ACA	ACA	C	none	C>none	C>none_ACA	G/C-1_GTGCGAG	4	1413	FALSE	FALSE
16_v.txt	32081	32081-Deletion-A--	Deletion	1	A	-	1926	26886	7.16358	62.9097	msh2	FALSE	CAN	JSY22	1	msh2-Rep1	CAA	nope	>1bp-ins	A/T-1	none	A/T-1	CCATGCAAAAAAG	AAAAAAG	GTT	GTT	T	none	T>none	T>none_GTT	A/T-1_AAAAAAG	4	1386	FALSE	FALSE
16_v.txt	32092	32092-Deletion-C--	Deletion	1	C	-	4	26886	0.0148776	60.25	msh2	FALSE	CAN	JSY22	1	msh2-Rep1	GCA	nope	>1bp-ins	G/C-1	none	G/C-1	AGCCTGCAACACC	CAACACC	CGT	GCA	C	none	nope	nope_GCA	G/C-1_CAACACC	4	1375	FALSE	FALSE
16_v.txt	32184	32184-Deletion-A--	Deletion	1	A	-	48	26886	0.178532	47.3125	msh2	FALSE	CAN	JSY22	1	msh2-Rep1	GAA	nope	>1bp-ins	A/T-1	none	A/T-1	GTAACGAAAACTG	AAAACTG	CTT	CTT	T	none	T>none	T>none_CTT	A/T-1_AAAACTG	4	1283	FALSE	FALSE
16_v.txt	32210	32210-Deletion-T--	Deletion	1	T	-	7	26885	0.0260368	46.1429	msh2	FALSE	CAN	JSY22	1	msh2-Rep1	CTT	nope	>1bp-ins	A/T-1	none	A/T-1	ACCACCTTTGGTG	TTTGGTG	GAA	CTT	T	none	nope	nope_CTT	A/T-1_TTTGGTG	4	1257	FALSE	FALSE
16_v.txt	32272	32272-Deletion-G--	Deletion	1	G	-	19	34999	0.0542873	36.4737	msh2	FALSE	CAN	JSY22	1	msh2-Rep1	CGG	nope	>1bp-ins	G/C-1	none	G/C-1	AAATACGGGAACC	GGGAACC	GCC	GCC	C	none	C>none	C>none_GCC	G/C-1_GGGAACC	4	1195	FALSE	FALSE
16_v.txt	32346	32346-Deletion-A--	Deletion	1	A	-	37	34999	0.105717	59.4054	msh2	FALSE	CAN	JSY22	1	msh2-Rep1	CAA	nope	>1bp-ins	A/T-1	none	A/T-1	TGTGGCAAAACCT	AAAACCT	GTT	GTT	T	none	T>none	T>none_GTT	A/T-1_AAAACCT	4	1121	FALSE	FALSE
16_v.txt	32381	32381-Deletion-A--	Deletion	1	A	-	8	34999	0.0228578	57.375	msh2	FALSE	CAN	JSY22	1	msh2-Rep1	TAA	nope	>1bp-ins	A/T-1	none	A/T-1	AATAATAAAGGGA	AAAGGGA	ATT	ATT	T	none	T>none	T>none_ATT	A/T-1_AAAGGGA	4	1086	FALSE	FALSE
16_v.txt	32384	32384-Deletion-G--	Deletion	1	G	-	5	34999	0.0142861	64	msh2	FALSE	CAN	JSY22	1	msh2-Rep1	AGG	nope	>1bp-ins	G/C-1	none	G/C-1	AATAAAGGGAGAA	GGGAGAA	TCC	TCC	C	none	C>none	C>none_TCC	G/C-1_GGGAGAA	4	1083	FALSE	FALSE
16_v.txt	32395	32395-Deletion-A--	Deletion	1	A	-	54	34999	0.15429	63.2222	msh2	FALSE	CAN	JSY22	1	msh2-Rep1	GAA	nope	>1bp-ins	A/T-1	none	A/T-1	AAGTAGAAACGTA	AAACGTA	CTT	CTT	T	none	T>none	T>none_CTT	A/T-1_AAACGTA	4	1072	FALSE	FALSE
16_v.txt	32424	32424-Deletion-G--	Deletion	1	G	-	17	34999	0.0485728	58.1765	msh2	FALSE	CAN	JSY22	1	msh2-Rep1	AGG	nope	>1bp-ins	G/C-1	none	G/C-1	AGTTTAGGGTCAT	GGGTCAT	TCC	TCC	C	none	C>none	C>none_TCC	G/C-1_GGGTCAT	4	1043	FALSE	FALSE
16_v.txt	32442	32442-Deletion-A--	Deletion	1	A	-	13	34999	0.0371439	56.7692	msh2	FALSE	CAN	JSY22	1	msh2-Rep1	TAA	nope	>1bp-ins	A/T-1	none	A/T-1	GGAACTAAAAGTC	AAAAGTC	ATT	ATT	T	none	T>none	T>none_ATT	A/T-1_AAAAGTC	4	1025	FALSE	FALSE
16_v.txt	32475	32475-Deletion-A--	Deletion	1	A	-	316	34999	0.902883	47.962	msh2	FALSE	CAN	JSY22	1	msh2-Rep1	GAA	nope	>1bp-ins	A/T-1	none	A/T-1	ATGTAGAAGGTTA	AAGGTTA	CTT	CTT	T	none	T>none	T>none_CTT	A/T-1_AAGGTTA	4	992	FALSE	FALSE
16_v.txt	32487	32487-Deletion-C--	Deletion	1	C	-	1	34999	0.002857	64	msh2	FALSE	CAN	JSY22	1	msh2-Rep1	ACG	nope	>1bp-ins	G/C-1	none	G/C-1	AAGATACGGAAAA	CGGAAAA	TGC	ACG	C	none	nope	nope_ACG	G/C-1_CGGAAAA	4	980	FALSE	FALSE
16_v.txt	32488	32488-Deletion-G--	Deletion	1	G	-	1	34999	0.002857	10	msh2	FALSE	CAN	JSY22	1	msh2-Rep1	CGG	nope	>1bp-ins	G/C-1	none	G/C-1	AGATACGGAAAAC	GGAAAAC	GCC	GCC	C	none	C>none	C>none_GCC	G/C-1_GGAAAAC	4	979	FALSE	FALSE
16_v.txt	32490	32490-Deletion-A--	Deletion	1	A	-	327	34999	0.934312	45.7768	msh2	FALSE	CAN	JSY22	1	msh2-Rep1	GAA	nope	>1bp-ins	A/T-1	none	A/T-1	ATACGGAAAACAA	AAAACAA	CTT	CTT	T	none	T>none	T>none_CTT	A/T-1_AAAACAA	4	977	FALSE	FALSE
16_v.txt	32498	32498-Deletion-T--	Deletion	1	T	-	18504	34999	52.8701	44.8528	msh2	FALSE	CAN	JSY22	1	msh2-Rep1	CTT	nope	>1bp-ins	A/T-1	none	A/T-1	AACAACTTTTTTG	TTTTTTG	GAA	CTT	T	none	nope	nope_CTT	A/T-1_TTTTTTG	4	969	FALSE	FALSE
16_v.txt	32528	32528-Deletion-G--	Deletion	1	G	-	6	34999	0.0171433	41.1667	msh2	FALSE	CAN	JSY22	1	msh2-Rep1	TGG	nope	>1bp-ins	G/C-1	none	G/C-1	TTTTCTGGGGTTT	GGGGTTT	ACC	ACC	C	none	C>none	C>none_ACC	G/C-1_GGGGTTT	4	939	FALSE	FALSE
16_v.txt	32583	32583-Deletion-A--	Deletion	1	A	-	12	32356	0.0370874	36.6667	msh2	FALSE	CAN	JSY22	1	msh2-Rep1	GAA	nope	>1bp-ins	A/T-1	none	A/T-1	AATGTGAAGGCAG	AAGGCAG	CTT	CTT	T	none	T>none	T>none_CTT	A/T-1_AAGGCAG	4	884	FALSE	FALSE
16_v.txt	32605	32605-Deletion-A--	Deletion	1	A	-	90	32356	0.278156	41.7111	msh2	FALSE	CAN	JSY22	1	msh2-Rep1	GAA	nope	>1bp-ins	A/T-1	none	A/T-1	AAGAGGAAACCCA	AAACCCA	CTT	CTT	T	none	T>none	T>none_CTT	A/T-1_AAACCCA	4	862	FALSE	FALSE
16_v.txt	32619	32619-Deletion-A--	Deletion	1	A	-	9	32356	0.0278156	42.8889	msh2	FALSE	CAN	JSY22	1	msh2-Rep1	GAA	nope	>1bp-ins	A/T-1	none	A/T-1	CCTAAGAACCTCC	AACCTCC	CTT	CTT	T	none	T>none	T>none_CTT	A/T-1_AACCTCC	4	848	FALSE	FALSE
16_v.txt	32631	32631-Deletion-T--	Deletion	1	T	-	62	32356	0.191618	53.0323	msh2	FALSE	CAN	JSY22	1	msh2-Rep1	GTT	nope	>1bp-ins	A/T-1	none	A/T-1	CCTTCGTTTTTAT	TTTTTAT	CAA	GTT	T	none	nope	nope_GTT	A/T-1_TTTTTAT	4	836	FALSE	FALSE
16_v.txt	32658	32658-Deletion-C--	Deletion	1	C	-	25	32356	0.0772654	60.72	msh2	FALSE	CAN	JSY22	1	msh2-Rep1	ACC	nope	>1bp-ins	G/C-1	none	G/C-1	CCTGGACCCCAGG	CCCCAGG	TGG	ACC	C	none	nope	nope_ACC	G/C-1_CCCCAGG	4	809	FALSE	FALSE
16_v.txt	32670	32670-Deletion-G--	Deletion	1	G	-	37	32356	0.114353	60.2162	msh2	FALSE	CAN	JSY22	1	msh2-Rep1	TGG	nope	>1bp-ins	G/C-1	none	G/C-1	GCACCTGGGTTTC	GGGTTTC	ACC	ACC	C	none	C>none	C>none_ACC	G/C-1_GGGTTTC	4	797	FALSE	FALSE
16_v.txt	32688	32688-Deletion-A--	Deletion	1	A	-	54	32356	0.166893	62.3704	msh2	FALSE	CAN	JSY22	1	msh2-Rep1	GAA	nope	>1bp-ins	A/T-1	none	A/T-1	TAACGGAATCCAA	AATCCAA	CTT	CTT	T	none	T>none	T>none_CTT	A/T-1_AATCCAA	4	779	FALSE	FALSE
16_v.txt	32707	32707-Deletion-C--	Deletion	1	C	-	37	32356	0.114353	60.7568	msh2	FALSE	CAN	JSY22	1	msh2-Rep1	ACC	nope	>1bp-ins	G/C-1	none	G/C-1	CGGTAACCCCAGC	CCCCAGC	TGG	ACC	C	none	nope	nope_ACC	G/C-1_CCCCAGC	4	760	FALSE	FALSE
16_v.txt	32719	32719-Deletion-A--	Deletion	1	A	-	11	32356	0.0339968	61.7273	msh2	FALSE	CAN	JSY22	1	msh2-Rep1	CAA	nope	>1bp-ins	A/T-1	none	A/T-1	CACCACAAACCAT	AAACCAT	GTT	GTT	T	none	T>none	T>none_GTT	A/T-1_AAACCAT	4	748	FALSE	FALSE
16_v.txt	32728	32728-Deletion-A--	Deletion	1	A	-	1355	32356	4.18779	60.7041	msh2	FALSE	CAN	JSY22	1	msh2-Rep1	CAA	nope	>1bp-ins	A/T-1	none	A/T-1	CCATACAAAAACA	AAAAACA	GTT	GTT	T	none	T>none	T>none_GTT	A/T-1_AAAAACA	4	739	FALSE	FALSE
16_v.txt	32740	32740-Deletion-T--	Deletion	1	T	-	9	32356	0.0278156	56.8889	msh2	FALSE	CAN	JSY22	1	msh2-Rep1	ATT	nope	>1bp-ins	A/T-1	none	A/T-1	AGTATATTAGAAA	TTAGAAA	TAA	ATT	T	none	nope	nope_ATT	A/T-1_TTAGAAA	4	727	FALSE	FALSE
16_v.txt	32779	32779-Deletion-C--	Deletion	1	C	-	6	32356	0.0185437	51	msh2	FALSE	CAN	JSY22	1	msh2-Rep1	ACC	nope	>1bp-ins	G/C-1	none	G/C-1	AAGCGACCCAGAA	CCCAGAA	TGG	ACC	C	none	nope	nope_ACC	G/C-1_CCCAGAA	4	688	FALSE	FALSE
16_v.txt	32810	32810-Deletion-A--	Deletion	1	A	-	24	32356	0.0741748	42.375	msh2	FALSE	CAN	JSY22	1	msh2-Rep1	CAG	nope	>1bp-ins	A/T-1	none	A/T-1	TTTGACAGGGAAC	AGGGAAC	GTC	GTC	T	none	T>none	T>none_GTC	A/T-1_AGGGAAC	4	657	FALSE	FALSE
16_v.txt	32839	32839-Deletion-C--	Deletion	1	C	-	5	32356	0.0154531	39.6	msh2	FALSE	CAN	JSY22	1	msh2-Rep1	ACC	nope	>1bp-ins	G/C-1	none	G/C-1	TAATTACCCAAAA	CCCAAAA	TGG	ACC	C	none	nope	nope_ACC	G/C-1_CCCAAAA	4	628	FALSE	FALSE
16_v.txt	32842	32842-Deletion-A--	Deletion	1	A	-	1798	32356	5.55693	41.5539	msh2	FALSE	CAN	JSY22	1	msh2-Rep1	CAA	nope	>1bp-ins	A/T-1	none	A/T-1	TTACCCAAAAAAT	AAAAAAT	GTT	GTT	T	none	T>none	T>none_GTT	A/T-1_AAAAAAT	4	625	FALSE	FALSE
16_v.txt	32855	32855-Deletion-C--	Deletion	1	C	-	2	32354	0.006182	38	msh2	FALSE	CAN	JSY22	1	msh2-Rep1	TCC	nope	>1bp-ins	G/C-1	none	G/C-1	ACTAATCCATGCC	CCATGCC	AGG	TCC	C	none	nope	nope_TCC	G/C-1_CCATGCC	4	612	FALSE	FALSE
16_v.txt	32884	32884-Deletion-A--	Deletion	1	A	-	11	33576	0.0327615	37.6364	msh2	FALSE	CAN	JSY22	1	msh2-Rep1	CAA	nope	>1bp-ins	A/T-1	none	A/T-1	ACGTCCAAAATTG	AAAATTG	GTT	GTT	T	none	T>none	T>none_GTT	A/T-1_AAAATTG	4	583	FALSE	FALSE
16_v.txt	32901	32901-Deletion-C--	Deletion	1	C	-	1	33576	0.002978	34	msh2	FALSE	CAN	JSY22	1	msh2-Rep1	GCC	nope	>1bp-ins	G/C-1	none	G/C-1	ACTTGGCCAACTA	CCAACTA	CGG	GCC	C	none	nope	nope_GCC	G/C-1_CCAACTA	4	566	FALSE	FALSE
16_v.txt	32924	32924-Deletion-A--	Deletion	1	A	-	422	33576	1.25685	54.0498	msh2	FALSE	CAN	JSY22	1	msh2-Rep1	CAA	nope	>1bp-ins	A/T-1	none	A/T-1	CAGGGCAAAAGTG	AAAAGTG	GTT	GTT	T	none	T>none	T>none_GTT	A/T-1_AAAAGTG	4	543	FALSE	FALSE
16_v.txt	32941	32941-Deletion-A--	Deletion	1	A	-	39	33576	0.116154	55.3333	msh2	FALSE	CAN	JSY22	1	msh2-Rep1	GAA	nope	>1bp-ins	A/T-1	none	A/T-1	CCCAAGAAAACCA	AAAACCA	CTT	CTT	T	none	T>none	T>none_CTT	A/T-1_AAAACCA	4	526	FALSE	FALSE
16_v.txt	32983	32983-Deletion-A--	Deletion	1	A	-	11	33576	0.0327615	63.7273	msh2	FALSE	CAN	JSY22	1	msh2-Rep1	GAA	nope	>1bp-ins	A/T-1	none	A/T-1	CTGGAGAAAGGAA	AAAGGAA	CTT	CTT	T	none	T>none	T>none_CTT	A/T-1_AAAGGAA	4	484	FALSE	FALSE
16_v.txt	33000	33000-Deletion-A--	Deletion	1	A	-	143	33576	0.425899	61.5944	msh2	FALSE	CAN	JSY22	1	msh2-Rep1	GAA	nope	>1bp-ins	A/T-1	none	A/T-1	TGTGAGAAAACTG	AAAACTG	CTT	CTT	T	none	T>none	T>none_CTT	A/T-1_AAAACTG	4	467	FALSE	FALSE
16_v.txt	33018	33018-Deletion-G--	Deletion	1	G	-	11	33576	0.0327615	58.1818	msh2	FALSE	CAN	JSY22	1	msh2-Rep1	TGT	nope	>1bp-ins	G/C-1	none	G/C-1	GAGGATGTAACAG	GTAACAG	ACA	ACA	C	none	C>none	C>none_ACA	G/C-1_GTAACAG	4	449	FALSE	FALSE
16_v.txt	33138	33138-Deletion-A--	Deletion	1	A	-	10	33576	0.0297832	40.6	msh2	FALSE	CAN	JSY22	1	msh2-Rep1	TAA	nope	>1bp-ins	A/T-1	none	A/T-1	GTGGATAAACCAA	AAACCAA	ATT	ATT	T	none	T>none	T>none_ATT	A/T-1_AAACCAA	4	329	FALSE	FALSE
16_v.txt	33147	33147-Deletion-A--	Deletion	1	A	-	12	33576	0.0357398	37.5833	msh2	FALSE	CAN	JSY22	1	msh2-Rep1	GAA	nope	>1bp-ins	A/T-1	none	A/T-1	CCAATGAAAAGAC	AAAAGAC	CTT	CTT	T	none	T>none	T>none_CTT	A/T-1_AAAAGAC	4	320	FALSE	FALSE
16_v.txt	33156	33156-Deletion-G--	Deletion	1	G	-	17	33576	0.0506314	37	msh2	FALSE	CAN	JSY22	1	msh2-Rep1	TGT	nope	>1bp-ins	G/C-1	none	G/C-1	AGACCTGTACCAA	GTACCAA	ACA	ACA	C	none	C>none	C>none_ACA	G/C-1_GTACCAA	4	311	FALSE	FALSE
16_v.txt	33276	33276-Deletion-G--	Deletion	1	G	-	4	19792	0.0202102	35.25	msh2	FALSE	CAN	JSY22	1	msh2-Rep1	CGT	nope	>1bp-ins	G/C-1	none	G/C-1	GAGAACGTATCCT	GTATCCT	GCA	GCA	C	none	C>none	C>none_GCA	G/C-1_GTATCCT	4	191	FALSE	FALSE
16_v.txt	33303	33303-Deletion-A--	Deletion	1	A	-	6	19792	0.0303153	51.3333	msh2	FALSE	CAN	JSY22	1	msh2-Rep1	GAA	nope	>1bp-ins	A/T-1	none	A/T-1	GTCGGGAAAGAGC	AAAGAGC	CTT	CTT	T	none	T>none	T>none_CTT	A/T-1_AAAGAGC	4	164	FALSE	FALSE
16_v.txt	33474	33474-Deletion-C--	Deletion	1	C	-	66	19792	0.333468	27.9242	msh2	FALSE	CAN	JSY22	1	msh2-Rep1	GCC	nope	>1bp-ins	G/C-1	none	G/C-1	GCTATGCCTTTTT	CCTTTTT	CGG	GCC	C	none	nope	nope_GCC	G/C-1_CCTTTTT	4	N_A	FALSE	FALSE
17_v.txt	31723	31723-SNV-A-C	SNV	1	A	C	3	16228	0.0184866	50.3333	msh2	FALSE	CAN	JSY22	2	msh2-Rep2	CAA	A>C	G/C+1	A/T-1	TA>GC	TA>GC	TGTCCCAAAAAGT	AAAAAGT	GTT	GTT	T	G	T>G	T>G_GTT	TA>GC_AAAAAGT	4	1744	FALSE	FALSE
17_v.txt	31904	31904-SNV-T-G	SNV	1	T	G	3	16228	0.0184866	20.0034	msh2	FALSE	CAN	JSY22	2	msh2-Rep2	ATT	T>G	G/C+1	A/T-1	TA>GC	TA>GC	ATTGAATTTTGGT	TTTTGGT	TAA	ATT	T	C	T>G	T>G_ATT	TA>GC_TTTTGGT	4	1563	FALSE	FALSE
17_v.txt	31967	31967-SNV-A-C	SNV	1	A	C	30	25123	0.119412	24.3	msh2	FALSE	CAN	JSY22	2	msh2-Rep2	AAT	A>C	G/C+1	A/T-1	TA>GC	TA>GC	CGCATAATAAGCC	ATAAGCC	TTA	TTA	T	G	T>G	T>G_TTA	TA>GC_ATAAGCC	4	1500	FALSE	FALSE
17_v.txt	32493	32493-SNV-A-C	SNV	1	A	C	10	39775	0.0251414	33.4	msh2	FALSE	CAN	JSY22	2	msh2-Rep2	AAC	A>C	G/C+1	A/T-1	TA>GC	TA>GC	CGGAAAACAACTT	ACAACTT	TTG	TTG	T	G	T>G	T>G_TTG	TA>GC_ACAACTT	4	974	FALSE	FALSE
17_v.txt	32642	32642-SNV-A-C	SNV	1	A	C	5	32639	0.0153191	14.6003	msh2	FALSE	CAN	JSY22	2	msh2-Rep2	TAG	A>C	G/C+1	A/T-1	TA>GC	TA>GC	ATCCTTAGATATT	AGATATT	ATC	ATC	T	G	T>G	T>G_ATC	TA>GC_AGATATT	4	825	FALSE	FALSE
17_v.txt	32765	32765-SNV-T-G	SNV	1	T	G	6	32645	0.0183795	36.6667	msh2	FALSE	CAN	JSY22	2	msh2-Rep2	CTT	T>G	G/C+1	A/T-1	TA>GC	TA>GC	TAAAACTTTGATG	TTTGATG	GAA	CTT	T	C	T>G	T>G_CTT	TA>GC_TTTGATG	4	702	FALSE	FALSE
17_v.txt	32801	32801-SNV-A-C	SNV	1	A	C	12	32645	0.0367591	37.75	msh2	FALSE	CAN	JSY22	2	msh2-Rep2	AAT	A>C	G/C+1	A/T-1	TA>GC	TA>GC	ACCGTAATATTTG	ATATTTG	TTA	TTA	T	G	T>G	T>G_TTA	TA>GC_ATATTTG	4	666	FALSE	FALSE
17_v.txt	32810	32810-SNV-A-C	SNV	1	A	C	5	32644	0.0153168	37.402	msh2	FALSE	CAN	JSY22	2	msh2-Rep2	CAG	A>C	G/C+1	A/T-1	TA>GC	TA>GC	TTTGACAGGGAAC	AGGGAAC	GTC	GTC	T	G	T>G	T>G_GTC	TA>GC_AGGGAAC	4	657	FALSE	FALSE
17_v.txt	32842	32842-SNV-A-C	SNV	1	A	C	5	32645	0.0153163	31.9989	msh2	FALSE	CAN	JSY22	2	msh2-Rep2	CAA	A>C	G/C+1	A/T-1	TA>GC	TA>GC	TTACCCAAAAAAT	AAAAAAT	GTT	GTT	T	G	T>G	T>G_GTT	TA>GC_AAAAAAT	4	625	FALSE	FALSE
17_v.txt	32884	32884-SNV-A-C	SNV	1	A	C	12	34628	0.034654	35.663	msh2	FALSE	CAN	JSY22	2	msh2-Rep2	CAA	A>C	G/C+1	A/T-1	TA>GC	TA>GC	ACGTCCAAAATTG	AAAATTG	GTT	GTT	T	G	T>G	T>G_GTT	TA>GC_AAAATTG	4	583	FALSE	FALSE
17_v.txt	32913	32913-SNV-A-C	SNV	1	A	C	42	34628	0.121289	30.9762	msh2	FALSE	CAN	JSY22	2	msh2-Rep2	AAG	A>C	G/C+1	A/T-1	TA>GC	TA>GC	ACACTAAGTTCCA	AGTTCCA	TTC	TTC	T	G	T>G	T>G_TTC	TA>GC_AGTTCCA	4	554	FALSE	FALSE
17_v.txt	32916	32916-SNV-T-G	SNV	1	T	G	38	34628	0.109738	48.7615	msh2	FALSE	CAN	JSY22	2	msh2-Rep2	TTC	T>G	G/C+1	A/T-1	TA>GC	TA>GC	CTAAGTTCCAGGG	TCCAGGG	AAG	TTC	T	C	T>G	T>G_TTC	TA>GC_TCCAGGG	4	551	FALSE	FALSE
17_v.txt	33099	33099-SNV-A-C	SNV	1	A	C	10	34628	0.0288784	38.7	msh2	FALSE	CAN	JSY22	2	msh2-Rep2	AAG	A>C	G/C+1	A/T-1	TA>GC	TA>GC	GATATAAGAGCGC	AGAGCGC	TTC	TTC	T	G	T>G	T>G_TTC	TA>GC_AGAGCGC	4	368	FALSE	FALSE
17_v.txt	33204	33204-SNV-A-C	SNV	1	A	C	196	24068	0.814359	37.5714	msh2	FALSE	CAN	JSY22	2	msh2-Rep2	AAG	A>C	G/C+1	A/T-1	TA>GC	TA>GC	TGCTTAAGCTCTC	AGCTCTC	TTC	TTC	T	G	T>G	T>G_TTC	TA>GC_AGCTCTC	4	263	FALSE	FALSE
17_v.txt	33207	33207-SNV-T-G	SNV	1	T	G	6	24068	0.0249294	18.4996	msh2	FALSE	CAN	JSY22	2	msh2-Rep2	CTC	T>G	G/C+1	A/T-1	TA>GC	TA>GC	TTAAGCTCTCTCT	TCTCTCT	GAG	CTC	T	C	T>G	T>G_CTC	TA>GC_TCTCTCT	4	260	FALSE	FALSE
17_v.txt	33317	33317-SNV-A-C	SNV	1	A	C	22	24068	0.0914077	48.5	msh2	FALSE	CAN	JSY22	2	msh2-Rep2	GAT	A>C	G/C+1	A/T-1	TA>GC	TA>GC	CAATGGATACAAT	ATACAAT	CTA	CTA	T	G	T>G	T>G_CTA	TA>GC_ATACAAT	4	150	FALSE	FALSE
17_v.txt	33476	33476-SNV-T-G	SNV	1	T	G	2	24063	0.008312	35.5002	msh2	FALSE	CAN	JSY22	2	msh2-Rep2	CTT	T>G	G/C+1	A/T-1	TA>GC	TA>GC	TATGCCTTTTTTT	TTTTTTT	GAA	CTT	T	C	T>G	T>G_CTT	TA>GC_TTTTTTT	4	N_A	FALSE	FALSE
17_v.txt	31822	31822-SNV-T-C	SNV	1	T	C	15	16228	0.0924328	52.9333	msh2	FALSE	CAN	JSY22	2	msh2-Rep2	CTG	T>C	G/C+1	A/T-1	TA>CG	TA>CG	TGCATCTGAATAT	TGAATAT	GAC	CTG	T	G	T>C	T>C_CTG	TA>CG_TGAATAT	4	1645	FALSE	FALSE
17_v.txt	32256	32256-SNV-A-G	SNV	1	A	G	154	39765	0.387275	36.5584	msh2	FALSE	CAN	JSY22	2	msh2-Rep2	TAG	A>G	G/C+1	A/T-1	TA>CG	TA>CG	TTTGATAGACCAA	AGACCAA	ATC	ATC	T	C	T>C	T>C_ATC	TA>CG_AGACCAA	4	1211	FALSE	FALSE
17_v.txt	32305	32305-SNV-A-G	SNV	1	A	G	47	39775	0.118165	53.617	msh2	FALSE	CAN	JSY22	2	msh2-Rep2	GAA	A>G	G/C+1	A/T-1	TA>CG	TA>CG	CGGCAGAAATAAT	AAATAAT	CTT	CTT	T	C	T>C	T>C_CTT	TA>CG_AAATAAT	4	1162	FALSE	FALSE
17_v.txt	32472	32472-SNV-T-C	SNV	1	T	C	202	39775	0.507857	48.0248	msh2	FALSE	CAN	JSY22	2	msh2-Rep2	GTA	T>C	G/C+1	A/T-1	TA>CG	TA>CG	CCAATGTAGAAGG	TAGAAGG	CAT	GTA	T	G	T>C	T>C_GTA	TA>CG_TAGAAGG	4	995	FALSE	FALSE
17_v.txt	32810	32810-SNV-A-G	SNV	1	A	G	51	32644	0.156231	45.9026	msh2	FALSE	CAN	JSY22	2	msh2-Rep2	CAG	A>G	G/C+1	A/T-1	TA>CG	TA>CG	TTTGACAGGGAAC	AGGGAAC	GTC	GTC	T	C	T>C	T>C_GTC	TA>CG_AGGGAAC	4	657	FALSE	FALSE
17_v.txt	32842	32842-SNV-A-G	SNV	1	A	G	4	32645	0.012253	33.4986	msh2	FALSE	CAN	JSY22	2	msh2-Rep2	CAA	A>G	G/C+1	A/T-1	TA>CG	TA>CG	TTACCCAAAAAAT	AAAAAAT	GTT	GTT	T	C	T>C	T>C_GTT	TA>CG_AAAAAAT	4	625	FALSE	FALSE
17_v.txt	32884	32884-SNV-A-G	SNV	1	A	G	3	34628	0.008664	28.3311	msh2	FALSE	CAN	JSY22	2	msh2-Rep2	CAA	A>G	G/C+1	A/T-1	TA>CG	TA>CG	ACGTCCAAAATTG	AAAATTG	GTT	GTT	T	C	T>C	T>C_GTT	TA>CG_AAAATTG	4	583	FALSE	FALSE
17_v.txt	32927	32927-SNV-A-G	SNV	1	A	G	29	34628	0.0837473	53.3793	msh2	FALSE	CAN	JSY22	2	msh2-Rep2	AAG	A>G	G/C+1	A/T-1	TA>CG	TA>CG	GGCAAAAGTGATT	AGTGATT	TTC	TTC	T	C	T>C	T>C_TTC	TA>CG_AGTGATT	4	540	FALSE	FALSE
17_v.txt	32929	32929-SNV-T-C	SNV	1	T	C	53	34628	0.153055	51.1321	msh2	FALSE	CAN	JSY22	2	msh2-Rep2	GTG	T>C	G/C+1	A/T-1	TA>CG	TA>CG	CAAAAGTGATTGC	TGATTGC	CAC	GTG	T	G	T>C	T>C_GTG	TA>CG_TGATTGC	4	538	FALSE	FALSE
17_v.txt	32947	32947-SNV-A-G	SNV	1	A	G	72	34628	0.207924	59.1528	msh2	FALSE	CAN	JSY22	2	msh2-Rep2	CAA	A>G	G/C+1	A/T-1	TA>CG	TA>CG	AAAACCAATACAT	AATACAT	GTT	GTT	T	C	T>C	T>C_GTT	TA>CG_AATACAT	4	520	FALSE	FALSE
17_v.txt	33000	33000-SNV-A-G	SNV	1	A	G	10	34627	0.0288792	53.6998	msh2	FALSE	CAN	JSY22	2	msh2-Rep2	GAA	A>G	G/C+1	A/T-1	TA>CG	TA>CG	TGTGAGAAAACTG	AAAACTG	CTT	CTT	T	C	T>C	T>C_CTT	TA>CG_AAAACTG	4	467	FALSE	FALSE
17_v.txt	33042	33042-SNV-T-C	SNV	1	T	C	33	34628	0.0952986	59.6667	msh2	FALSE	CAN	JSY22	2	msh2-Rep2	TTC	T>C	G/C+1	A/T-1	TA>CG	TA>CG	GCCATTTCACCCA	TCACCCA	AAG	TTC	T	G	T>C	T>C_TTC	TA>CG_TCACCCA	4	425	FALSE	FALSE
17_v.txt	33126	33126-SNV-A-G	SNV	1	A	G	58	34628	0.167495	42.3448	msh2	FALSE	CAN	JSY22	2	msh2-Rep2	CAG	A>G	G/C+1	A/T-1	TA>CG	TA>CG	TTGGTCAGAGGTG	AGAGGTG	GTC	GTC	T	C	T>C	T>C_GTC	TA>CG_AGAGGTG	4	341	FALSE	FALSE
17_v.txt	33174	33174-SNV-A-G	SNV	1	A	G	37	34619	0.106878	35.6757	msh2	FALSE	CAN	JSY22	2	msh2-Rep2	AAG	A>G	G/C+1	A/T-1	TA>CG	TA>CG	CCACCAAGGGCAA	AGGGCAA	TTC	TTC	T	C	T>C	T>C_TTC	TA>CG_AGGGCAA	4	293	FALSE	FALSE
17_v.txt	33204	33204-SNV-A-G	SNV	1	A	G	81	24068	0.336546	36.5185	msh2	FALSE	CAN	JSY22	2	msh2-Rep2	AAG	A>G	G/C+1	A/T-1	TA>CG	TA>CG	TGCTTAAGCTCTC	AGCTCTC	TTC	TTC	T	C	T>C	T>C_TTC	TA>CG_AGCTCTC	4	263	FALSE	FALSE
17_v.txt	33207	33207-SNV-T-C	SNV	1	T	C	24	24068	0.0997175	21.2076	msh2	FALSE	CAN	JSY22	2	msh2-Rep2	CTC	T>C	G/C+1	A/T-1	TA>CG	TA>CG	TTAAGCTCTCTCT	TCTCTCT	GAG	CTC	T	G	T>C	T>C_CTC	TA>CG_TCTCTCT	4	260	FALSE	FALSE
17_v.txt	33331	33331-SNV-T-C	SNV	1	T	C	8	24068	0.0332392	52.3684	msh2	FALSE	CAN	JSY22	2	msh2-Rep2	CTT	T>C	G/C+1	A/T-1	TA>CG	TA>CG	CTTTACTTTTCTC	TTTTCTC	GAA	CTT	T	G	T>C	T>C_CTT	TA>CG_TTTTCTC	4	136	FALSE	FALSE
17_v.txt	33369	33369-SNV-T-C	SNV	1	T	C	5	24068	0.0207745	50.5999	msh2	FALSE	CAN	JSY22	2	msh2-Rep2	GTG	T>C	G/C+1	A/T-1	TA>CG	TA>CG	CTGTGGTGTGTTT	TGTGTTT	CAC	GTG	T	G	T>C	T>C_GTG	TA>CG_TGTGTTT	4	98	FALSE	FALSE
17_v.txt	33476	33476-SNV-T-C	SNV	1	T	C	46	24063	0.191165	32.6741	msh2	FALSE	CAN	JSY22	2	msh2-Rep2	CTT	T>C	G/C+1	A/T-1	TA>CG	TA>CG	TATGCCTTTTTTT	TTTTTTT	GAA	CTT	T	G	T>C	T>C_CTT	TA>CG_TTTTTTT	4	N_A	FALSE	FALSE
17_v.txt	32498	32498-SNV-T-A	SNV	1	T	A	7	39775	0.017599	41.7101	msh2	FALSE	CAN	JSY22	2	msh2-Rep2	CTT	T>A	A/T+1	A/T-1	TA>AT	TA>AT	AACAACTTTTTTG	TTTTTTG	GAA	CTT	T	T	T>A	T>A_CTT	TA>AT_TTTTTTG	4	969	FALSE	FALSE
17_v.txt	32565	32565-SNV-T-A	SNV	1	T	A	42	32623	0.128744	37.5211	msh2	FALSE	CAN	JSY22	2	msh2-Rep2	TTC	T>A	A/T+1	A/T-1	TA>AT	TA>AT	ACTAGTTCAGTAC	TCAGTAC	AAG	TTC	T	T	T>A	T>A_TTC	TA>AT_TCAGTAC	4	902	FALSE	FALSE
17_v.txt	32760	32760-SNV-A-T	SNV	1	A	T	47	32645	0.143973	53.0213	msh2	FALSE	CAN	JSY22	2	msh2-Rep2	TAA	A>T	A/T+1	A/T-1	TA>AT	TA>AT	ATGGCTAAAACTT	AAAACTT	ATT	ATT	T	A	T>A	T>A_ATT	TA>AT_AAAACTT	4	707	FALSE	FALSE
17_v.txt	32820	32820-SNV-T-A	SNV	1	T	A	29	32645	0.0888344	44.3444	msh2	FALSE	CAN	JSY22	2	msh2-Rep2	GTT	T>A	A/T+1	A/T-1	TA>AT	TA>AT	AACAAGTTCATTA	TTCATTA	CAA	GTT	T	T	T>A	T>A_GTT	TA>AT_TTCATTA	4	647	FALSE	FALSE
17_v.txt	33000	33000-SNV-A-T	SNV	1	A	T	6	34627	0.0173275	40.9991	msh2	FALSE	CAN	JSY22	2	msh2-Rep2	GAA	A>T	A/T+1	A/T-1	TA>AT	TA>AT	TGTGAGAAAACTG	AAAACTG	CTT	CTT	T	A	T>A	T>A_CTT	TA>AT_AAAACTG	4	467	FALSE	FALSE
17_v.txt	33317	33317-SNV-A-T	SNV	1	A	T	8	24068	0.0332392	58.625	msh2	FALSE	CAN	JSY22	2	msh2-Rep2	GAT	A>T	A/T+1	A/T-1	TA>AT	TA>AT	CAATGGATACAAT	ATACAAT	CTA	CTA	T	A	T>A	T>A_CTA	TA>AT_ATACAAT	4	150	FALSE	FALSE
17_v.txt	33369	33369-SNV-T-A	SNV	1	T	A	1	24068	0.004155	63.9992	msh2	FALSE	CAN	JSY22	2	msh2-Rep2	GTG	T>A	A/T+1	A/T-1	TA>AT	TA>AT	CTGTGGTGTGTTT	TGTGTTT	CAC	GTG	T	T	T>A	T>A_GTG	TA>AT_TGTGTTT	4	98	FALSE	FALSE
17_v.txt	31650	31650-SNV-C-T	SNV	1	C	T	43	16228	0.264974	35.6047	msh2	FALSE	CAN	JSY22	2	msh2-Rep2	GCG	C>T	A/T+1	G/C-1	CG>TA	CG>TA	AGAATGCGAAATG	CGAAATG	CGC	GCG	C	A	C>T	C>T_GCG	CG>TA_CGAAATG	4	1817	FALSE	FALSE
17_v.txt	31658	31658-SNV-C-T	SNV	1	C	T	23	16228	0.14173	35.3039	msh2	FALSE	CAN	JSY22	2	msh2-Rep2	GCG	C>T	A/T+1	G/C-1	CG>TA	CG>TA	AAATGGCGTGGAA	CGTGGAA	CGC	GCG	C	A	C>T	C>T_GCG	CG>TA_CGTGGAA	4	1809	FALSE	FALSE
17_v.txt	31806	31806-SNV-C-T	SNV	1	C	T	934	16228	5.75548	58.7591	msh2	FALSE	CAN	JSY22	2	msh2-Rep2	CCA	C>T	A/T+1	G/C-1	CG>TA	CG>TA	ATCTTCCAAATAA	CAAATAA	GGT	CCA	C	A	C>T	C>T_CCA	CG>TA_CAAATAA	4	1661	FALSE	FALSE
17_v.txt	31834	31834-SNV-G-A	SNV	1	G	A	66	16228	0.406704	53.3433	msh2	FALSE	CAN	JSY22	2	msh2-Rep2	TGA	G>A	A/T+1	G/C-1	CG>TA	CG>TA	TGCATTGAAATAA	GAAATAA	ACT	ACT	C	T	C>T	C>T_ACT	CG>TA_GAAATAA	4	1633	FALSE	FALSE
17_v.txt	31844	31844-SNV-C-T	SNV	1	C	T	20	16228	0.123244	50.45	msh2	FALSE	CAN	JSY22	2	msh2-Rep2	TCC	C>T	A/T+1	G/C-1	CG>TA	CG>TA	TAAGATCCAAACA	CCAAACA	AGG	TCC	C	A	C>T	C>T_TCC	CG>TA_CCAAACA	4	1623	FALSE	FALSE
17_v.txt	31879	31879-SNV-C-T	SNV	1	C	T	17	16228	0.104757	45.0588	msh2	FALSE	CAN	JSY22	2	msh2-Rep2	GCG	C>T	A/T+1	G/C-1	CG>TA	CG>TA	TATAGGCGGCAGC	CGGCAGC	CGC	GCG	C	A	C>T	C>T_GCG	CG>TA_CGGCAGC	4	1588	FALSE	FALSE
17_v.txt	31881	31881-SNV-G-A	SNV	1	G	A	18	16228	0.110919	45.3889	msh2	FALSE	CAN	JSY22	2	msh2-Rep2	GGC	G>A	A/T+1	G/C-1	CG>TA	CG>TA	TAGGCGGCAGCAA	GCAGCAA	CCG	CCG	C	T	C>T	C>T_CCG	CG>TA_GCAGCAA	4	1586	FALSE	FALSE
17_v.txt	31884	31884-SNV-G-A	SNV	1	G	A	24	16228	0.147893	32.7083	msh2	FALSE	CAN	JSY22	2	msh2-Rep2	AGC	G>A	A/T+1	G/C-1	CG>TA	CG>TA	GCGGCAGCAAAGC	GCAAAGC	TCG	TCG	C	T	C>T	C>T_TCG	CG>TA_GCAAAGC	4	1583	FALSE	FALSE
17_v.txt	31947	31947-SNV-G-A	SNV	1	G	A	21	25105	0.0836487	35.1429	msh2	FALSE	CAN	JSY22	2	msh2-Rep2	CGT	G>A	A/T+1	G/C-1	CG>TA	CG>TA	ATGATCGTCATAA	GTCATAA	GCA	GCA	C	T	C>T	C>T_GCA	CG>TA_GTCATAA	4	1520	FALSE	FALSE
17_v.txt	31962	31962-SNV-G-A	SNV	1	G	A	38	25123	0.151256	35.4737	msh2	FALSE	CAN	JSY22	2	msh2-Rep2	CGC	G>A	A/T+1	G/C-1	CG>TA	CG>TA	GTGGCCGCATAAT	GCATAAT	GCG	GCG	C	T	C>T	C>T_GCG	CG>TA_GCATAAT	4	1505	FALSE	FALSE
17_v.txt	31972	31972-SNV-C-T	SNV	1	C	T	26	25123	0.103491	36.5385	msh2	FALSE	CAN	JSY22	2	msh2-Rep2	GCC	C>T	A/T+1	G/C-1	CG>TA	CG>TA	AATAAGCCAAGCC	CCAAGCC	CGG	GCC	C	A	C>T	C>T_GCC	CG>TA_CCAAGCC	4	1495	FALSE	FALSE
17_v.txt	31977	31977-SNV-C-T	SNV	1	C	T	27	25123	0.107471	48.9259	msh2	FALSE	CAN	JSY22	2	msh2-Rep2	GCC	C>T	A/T+1	G/C-1	CG>TA	CG>TA	GCCAAGCCGGGCA	CCGGGCA	CGG	GCC	C	A	C>T	C>T_GCC	CG>TA_CCGGGCA	4	1490	FALSE	FALSE
17_v.txt	31981	31981-SNV-G-A	SNV	1	G	A	968	25123	3.85304	53.3977	msh2	FALSE	CAN	JSY22	2	msh2-Rep2	GGC	G>A	A/T+1	G/C-1	CG>TA	CG>TA	AGCCGGGCATTAA	GCATTAA	CCG	CCG	C	T	C>T	C>T_CCG	CG>TA_GCATTAA	4	1486	FALSE	FALSE
17_v.txt	32057	32057-SNV-C-T	SNV	1	C	T	26	25123	0.103491	54.462	msh2	FALSE	CAN	JSY22	2	msh2-Rep2	GCG	C>T	A/T+1	G/C-1	CG>TA	CG>TA	GATGTGCGAGATT	CGAGATT	CGC	GCG	C	A	C>T	C>T_GCG	CG>TA_CGAGATT	4	1410	FALSE	FALSE
17_v.txt	32075	32075-SNV-C-T	SNV	1	C	T	306	25123	1.21801	61.7908	msh2	FALSE	CAN	JSY22	2	msh2-Rep2	ACC	C>T	A/T+1	G/C-1	CG>TA	CG>TA	AAATAACCATGCA	CCATGCA	TGG	ACC	C	A	C>T	C>T_ACC	CG>TA_CCATGCA	4	1392	FALSE	FALSE
17_v.txt	32079	32079-SNV-G-A	SNV	1	G	A	19	25123	0.0756279	58.0526	msh2	FALSE	CAN	JSY22	2	msh2-Rep2	TGC	G>A	A/T+1	G/C-1	CG>TA	CG>TA	AACCATGCAAAAA	GCAAAAA	ACG	ACG	C	T	C>T	C>T_ACG	CG>TA_GCAAAAA	4	1388	FALSE	FALSE
17_v.txt	32088	32088-SNV-C-T	SNV	1	C	T	23	25121	0.0915569	58.7391	msh2	FALSE	CAN	JSY22	2	msh2-Rep2	GCC	C>T	A/T+1	G/C-1	CG>TA	CG>TA	AAAAAGCCTGCAA	CCTGCAA	CGG	GCC	C	A	C>T	C>T_GCC	CG>TA_CCTGCAA	4	1379	FALSE	FALSE
17_v.txt	32092	32092-SNV-C-T	SNV	1	C	T	28	25123	0.111452	62	msh2	FALSE	CAN	JSY22	2	msh2-Rep2	GCA	C>T	A/T+1	G/C-1	CG>TA	CG>TA	AGCCTGCAACACC	CAACACC	CGT	GCA	C	A	C>T	C>T_GCA	CG>TA_CAACACC	4	1375	FALSE	FALSE
17_v.txt	32114	32114-SNV-C-T	SNV	1	C	T	133	25123	0.529395	60.4962	msh2	FALSE	CAN	JSY22	2	msh2-Rep2	GCC	C>T	A/T+1	G/C-1	CG>TA	CG>TA	TAATAGCCATTCG	CCATTCG	CGG	GCC	C	A	C>T	C>T_GCC	CG>TA_CCATTCG	4	1353	FALSE	FALSE
17_v.txt	32165	32165-SNV-G-A	SNV	1	G	A	35	25123	0.139315	49.3709	msh2	FALSE	CAN	JSY22	2	msh2-Rep2	CGC	G>A	A/T+1	G/C-1	CG>TA	CG>TA	CAAAGCGCCAAAT	GCCAAAT	GCG	GCG	C	T	C>T	C>T_GCG	CG>TA_GCCAAAT	4	1302	FALSE	FALSE
17_v.txt	32166	32166-SNV-C-T	SNV	1	C	T	107	25123	0.425905	46.6795	msh2	FALSE	CAN	JSY22	2	msh2-Rep2	GCC	C>T	A/T+1	G/C-1	CG>TA	CG>TA	AAAGCGCCAAATG	CCAAATG	CGG	GCC	C	A	C>T	C>T_GCC	CG>TA_CCAAATG	4	1301	FALSE	FALSE
17_v.txt	32173	32173-SNV-C-T	SNV	1	C	T	34	25123	0.135334	48.6765	msh2	FALSE	CAN	JSY22	2	msh2-Rep2	GCA	C>T	A/T+1	G/C-1	CG>TA	CG>TA	CAAATGCAGCAGT	CAGCAGT	CGT	GCA	C	A	C>T	C>T_GCA	CG>TA_CAGCAGT	4	1294	FALSE	FALSE
17_v.txt	32176	32176-SNV-C-T	SNV	1	C	T	20	25123	0.0796083	47.1	msh2	FALSE	CAN	JSY22	2	msh2-Rep2	GCA	C>T	A/T+1	G/C-1	CG>TA	CG>TA	ATGCAGCAGTAAC	CAGTAAC	CGT	GCA	C	A	C>T	C>T_GCA	CG>TA_CAGTAAC	4	1291	FALSE	FALSE
17_v.txt	32271	32271-SNV-C-T	SNV	1	C	T	358	39775	0.900063	35.9358	msh2	FALSE	CAN	JSY22	2	msh2-Rep2	ACG	C>T	A/T+1	G/C-1	CG>TA	CG>TA	AAAATACGGGAAC	CGGGAAC	TGC	ACG	C	A	C>T	C>T_ACG	CG>TA_CGGGAAC	4	1196	FALSE	FALSE
17_v.txt	32299	32299-SNV-C-T	SNV	1	C	T	75	39775	0.188561	54.4133	msh2	FALSE	CAN	JSY22	2	msh2-Rep2	GCG	C>T	A/T+1	G/C-1	CG>TA	CG>TA	AATTTGCGGCAGA	CGGCAGA	CGC	GCG	C	A	C>T	C>T_GCG	CG>TA_CGGCAGA	4	1168	FALSE	FALSE
17_v.txt	32413	32413-SNV-G-A	SNV	1	G	A	74	39775	0.186047	57.7432	msh2	FALSE	CAN	JSY22	2	msh2-Rep2	TGT	G>A	A/T+1	G/C-1	CG>TA	CG>TA	TAGATTGTGTTAG	GTGTTAG	ACA	ACA	C	T	C>T	C>T_ACA	CG>TA_GTGTTAG	4	1054	FALSE	FALSE
17_v.txt	32449	32449-SNV-C-T	SNV	1	C	T	55	39775	0.138278	50.2364	msh2	FALSE	CAN	JSY22	2	msh2-Rep2	CCA	C>T	A/T+1	G/C-1	CG>TA	CG>TA	AAAGTCCAATGAA	CAATGAA	GGT	CCA	C	A	C>T	C>T_CCA	CG>TA_CAATGAA	4	1018	FALSE	FALSE
17_v.txt	32466	32466-SNV-C-T	SNV	1	C	T	52	39775	0.130735	46.8654	msh2	FALSE	CAN	JSY22	2	msh2-Rep2	GCC	C>T	A/T+1	G/C-1	CG>TA	CG>TA	AGAGAGCCAATGT	CCAATGT	CGG	GCC	C	A	C>T	C>T_GCC	CG>TA_CCAATGT	4	1001	FALSE	FALSE
17_v.txt	32487	32487-SNV-C-T	SNV	1	C	T	76	39775	0.191075	47.2885	msh2	FALSE	CAN	JSY22	2	msh2-Rep2	ACG	C>T	A/T+1	G/C-1	CG>TA	CG>TA	AAGATACGGAAAA	CGGAAAA	TGC	ACG	C	A	C>T	C>T_ACG	CG>TA_CGGAAAA	4	980	FALSE	FALSE
17_v.txt	32530	32530-SNV-G-A	SNV	1	G	A	12	39775	0.0301697	39.3299	msh2	FALSE	CAN	JSY22	2	msh2-Rep2	GGG	G>A	A/T+1	G/C-1	CG>TA	CG>TA	TTCTGGGGTTTGC	GGTTTGC	CCC	CCC	C	T	C>T	C>T_CCC	CG>TA_GGTTTGC	4	937	FALSE	FALSE
17_v.txt	32535	32535-SNV-G-A	SNV	1	G	A	49	39774	0.123196	37.2857	msh2	FALSE	CAN	JSY22	2	msh2-Rep2	TGC	G>A	A/T+1	G/C-1	CG>TA	CG>TA	GGGTTTGCAGCTT	GCAGCTT	ACG	ACG	C	T	C>T	C>T_ACG	CG>TA_GCAGCTT	4	932	FALSE	FALSE
17_v.txt	32536	32536-SNV-C-T	SNV	1	C	T	50	39774	0.12571	37.179	msh2	FALSE	CAN	JSY22	2	msh2-Rep2	GCA	C>T	A/T+1	G/C-1	CG>TA	CG>TA	GGTTTGCAGCTTC	CAGCTTC	CGT	GCA	C	A	C>T	C>T_GCA	CG>TA_CAGCTTC	4	931	FALSE	FALSE
17_v.txt	32545	32545-SNV-C-T	SNV	1	C	T	84	39773	0.211199	37.4405	msh2	FALSE	CAN	JSY22	2	msh2-Rep2	CCA	C>T	A/T+1	G/C-1	CG>TA	CG>TA	CTTCACCAGCAGT	CAGCAGT	GGT	CCA	C	A	C>T	C>T_CCA	CG>TA_CAGCAGT	4	922	FALSE	FALSE
17_v.txt	32547	32547-SNV-G-A	SNV	1	G	A	15	39771	0.0377159	36.8	msh2	FALSE	CAN	JSY22	2	msh2-Rep2	AGC	G>A	A/T+1	G/C-1	CG>TA	CG>TA	TCACCAGCAGTGA	GCAGTGA	TCG	TCG	C	T	C>T	C>T_TCG	CG>TA_GCAGTGA	4	920	FALSE	FALSE
17_v.txt	32566	32566-SNV-C-T	SNV	1	C	T	40	32627	0.122598	34.025	msh2	FALSE	CAN	JSY22	2	msh2-Rep2	TCA	C>T	A/T+1	G/C-1	CG>TA	CG>TA	CTAGTTCAGTACC	CAGTACC	AGT	TCA	C	A	C>T	C>T_TCA	CG>TA_CAGTACC	4	901	FALSE	FALSE
17_v.txt	32590	32590-SNV-C-T	SNV	1	C	T	56	32639	0.171574	35.7857	msh2	FALSE	CAN	JSY22	2	msh2-Rep2	GCG	C>T	A/T+1	G/C-1	CG>TA	CG>TA	AGGCAGCGTTAAT	CGTTAAT	CGC	GCG	C	A	C>T	C>T_GCG	CG>TA_CGTTAAT	4	877	FALSE	FALSE
17_v.txt	32658	32658-SNV-C-T	SNV	1	C	T	41	32641	0.125609	55.9722	msh2	FALSE	CAN	JSY22	2	msh2-Rep2	ACC	C>T	A/T+1	G/C-1	CG>TA	CG>TA	CCTGGACCCCAGG	CCCCAGG	TGG	ACC	C	A	C>T	C>T_ACC	CG>TA_CCCCAGG	4	809	FALSE	FALSE
17_v.txt	32660	32660-SNV-C-T	SNV	1	C	T	1236	32645	3.78618	58.4693	msh2	FALSE	CAN	JSY22	2	msh2-Rep2	CCC	C>T	A/T+1	G/C-1	CG>TA	CG>TA	TGGACCCCAGGCA	CCAGGCA	GGG	CCC	C	A	C>T	C>T_CCC	CG>TA_CCAGGCA	4	807	FALSE	FALSE
17_v.txt	32679	32679-SNV-C-T	SNV	1	C	T	59	32644	0.180738	62.1468	msh2	FALSE	CAN	JSY22	2	msh2-Rep2	CCA	C>T	A/T+1	G/C-1	CG>TA	CG>TA	TTTCTCCAATAAC	CAATAAC	GGT	CCA	C	A	C>T	C>T_CCA	CG>TA_CAATAAC	4	788	FALSE	FALSE
17_v.txt	32700	32700-SNV-C-T	SNV	1	C	T	39	32645	0.119467	56.9231	msh2	FALSE	CAN	JSY22	2	msh2-Rep2	GCC	C>T	A/T+1	G/C-1	CG>TA	CG>TA	ACTGGGCCGGTAA	CCGGTAA	CGG	GCC	C	A	C>T	C>T_GCC	CG>TA_CCGGTAA	4	767	FALSE	FALSE
17_v.txt	32757	32757-SNV-G-A	SNV	1	G	A	27	32645	0.0827079	50.963	msh2	FALSE	CAN	JSY22	2	msh2-Rep2	GGC	G>A	A/T+1	G/C-1	CG>TA	CG>TA	ATAATGGCTAAAA	GCTAAAA	CCG	CCG	C	T	C>T	C>T_CCG	CG>TA_GCTAAAA	4	710	FALSE	FALSE
17_v.txt	32776	32776-SNV-C-T	SNV	1	C	T	35	32645	0.107214	51.8286	msh2	FALSE	CAN	JSY22	2	msh2-Rep2	GCG	C>T	A/T+1	G/C-1	CG>TA	CG>TA	TGGAAGCGACCCA	CGACCCA	CGC	GCG	C	A	C>T	C>T_GCG	CG>TA_CGACCCA	4	691	FALSE	FALSE
17_v.txt	32797	32797-SNV-C-T	SNV	1	C	T	65	32645	0.199112	44.3988	msh2	FALSE	CAN	JSY22	2	msh2-Rep2	CCG	C>T	A/T+1	G/C-1	CG>TA	CG>TA	ATTCACCGTAATA	CGTAATA	GGC	CCG	C	A	C>T	C>T_CCG	CG>TA_CGTAATA	4	670	FALSE	FALSE
17_v.txt	32798	32798-SNV-G-A	SNV	1	G	A	40	32645	0.12253	47.3255	msh2	FALSE	CAN	JSY22	2	msh2-Rep2	CGT	G>A	A/T+1	G/C-1	CG>TA	CG>TA	TTCACCGTAATAT	GTAATAT	GCA	GCA	C	T	C>T	C>T_GCA	CG>TA_GTAATAT	4	669	FALSE	FALSE
17_v.txt	32855	32855-SNV-C-T	SNV	1	C	T	135	32645	0.41354	36.7333	msh2	FALSE	CAN	JSY22	2	msh2-Rep2	TCC	C>T	A/T+1	G/C-1	CG>TA	CG>TA	ACTAATCCATGCC	CCATGCC	AGG	TCC	C	A	C>T	C>T_TCC	CG>TA_CCATGCC	4	612	FALSE	FALSE
17_v.txt	32856	32856-SNV-C-T	SNV	1	C	T	87	32645	0.266503	37.6762	msh2	FALSE	CAN	JSY22	2	msh2-Rep2	CCA	C>T	A/T+1	G/C-1	CG>TA	CG>TA	CTAATCCATGCCG	CATGCCG	GGT	CCA	C	A	C>T	C>T_CCA	CG>TA_CATGCCG	4	611	FALSE	FALSE
17_v.txt	32860	32860-SNV-C-T	SNV	1	C	T	56	32643	0.171553	37.2321	msh2	FALSE	CAN	JSY22	2	msh2-Rep2	GCC	C>T	A/T+1	G/C-1	CG>TA	CG>TA	TCCATGCCGCCAG	CCGCCAG	CGG	GCC	C	A	C>T	C>T_GCC	CG>TA_CCGCCAG	4	607	FALSE	FALSE
17_v.txt	32862	32862-SNV-G-A	SNV	1	G	A	30	32643	0.0919033	37.2333	msh2	FALSE	CAN	JSY22	2	msh2-Rep2	CGC	G>A	A/T+1	G/C-1	CG>TA	CG>TA	CATGCCGCCAGTG	GCCAGTG	GCG	GCG	C	T	C>T	C>T_GCG	CG>TA_GCCAGTG	4	605	FALSE	FALSE
17_v.txt	32879	32879-SNV-C-T	SNV	1	C	T	29	34626	0.0837521	37.3103	msh2	FALSE	CAN	JSY22	2	msh2-Rep2	ACG	C>T	A/T+1	G/C-1	CG>TA	CG>TA	TTTGTACGTCCAA	CGTCCAA	TGC	ACG	C	A	C>T	C>T_ACG	CG>TA_CGTCCAA	4	588	FALSE	FALSE
17_v.txt	32882	32882-SNV-C-T	SNV	1	C	T	70	34628	0.202149	23.7715	msh2	FALSE	CAN	JSY22	2	msh2-Rep2	TCC	C>T	A/T+1	G/C-1	CG>TA	CG>TA	GTACGTCCAAAAT	CCAAAAT	AGG	TCC	C	A	C>T	C>T_TCC	CG>TA_CCAAAAT	4	585	FALSE	FALSE
17_v.txt	32883	32883-SNV-C-T	SNV	1	C	T	34	34628	0.0981864	35.3354	msh2	FALSE	CAN	JSY22	2	msh2-Rep2	CCA	C>T	A/T+1	G/C-1	CG>TA	CG>TA	TACGTCCAAAATT	CAAAATT	GGT	CCA	C	A	C>T	C>T_CCA	CG>TA_CAAAATT	4	584	FALSE	FALSE
17_v.txt	32900	32900-SNV-G-A	SNV	1	G	A	38	34628	0.109738	33.7302	msh2	FALSE	CAN	JSY22	2	msh2-Rep2	GGC	G>A	A/T+1	G/C-1	CG>TA	CG>TA	GACTTGGCCAACT	GCCAACT	CCG	CCG	C	T	C>T	C>T_CCG	CG>TA_GCCAACT	4	567	FALSE	FALSE
17_v.txt	32901	32901-SNV-C-T	SNV	1	C	T	86	34628	0.248354	31.2565	msh2	FALSE	CAN	JSY22	2	msh2-Rep2	GCC	C>T	A/T+1	G/C-1	CG>TA	CG>TA	ACTTGGCCAACTA	CCAACTA	CGG	GCC	C	A	C>T	C>T_GCC	CG>TA_CCAACTA	4	566	FALSE	FALSE
17_v.txt	32922	32922-SNV-G-A	SNV	1	G	A	32	34628	0.0924108	57.2188	msh2	FALSE	CAN	JSY22	2	msh2-Rep2	GGC	G>A	A/T+1	G/C-1	CG>TA	CG>TA	TCCAGGGCAAAAG	GCAAAAG	CCG	CCG	C	T	C>T	C>T_CCG	CG>TA_GCAAAAG	4	545	FALSE	FALSE
17_v.txt	32936	32936-SNV-C-T	SNV	1	C	T	260	34628	0.750837	54.7769	msh2	FALSE	CAN	JSY22	2	msh2-Rep2	CCC	C>T	A/T+1	G/C-1	CG>TA	CG>TA	GATTGCCCAAGAA	CCAAGAA	GGG	CCC	C	A	C>T	C>T_CCC	CG>TA_CCAAGAA	4	531	FALSE	FALSE
17_v.txt	32945	32945-SNV-C-T	SNV	1	C	T	60	34628	0.17327	53.8667	msh2	FALSE	CAN	JSY22	2	msh2-Rep2	ACC	C>T	A/T+1	G/C-1	CG>TA	CG>TA	AGAAAACCAATAC	CCAATAC	TGG	ACC	C	A	C>T	C>T_ACC	CG>TA_CCAATAC	4	522	FALSE	FALSE
17_v.txt	32958	32958-SNV-C-T	SNV	1	C	T	40	34628	0.115513	50.25	msh2	FALSE	CAN	JSY22	2	msh2-Rep2	ACC	C>T	A/T+1	G/C-1	CG>TA	CG>TA	ATGTAACCATTGG	CCATTGG	TGG	ACC	C	A	C>T	C>T_ACC	CG>TA_CCATTGG	4	509	FALSE	FALSE
17_v.txt	32965	32965-SNV-C-T	SNV	1	C	T	32	34628	0.0924108	59.9688	msh2	FALSE	CAN	JSY22	2	msh2-Rep2	GCC	C>T	A/T+1	G/C-1	CG>TA	CG>TA	CATTGGCCGCACC	CCGCACC	CGG	GCC	C	A	C>T	C>T_GCC	CG>TA_CCGCACC	4	502	FALSE	FALSE
17_v.txt	32967	32967-SNV-G-A	SNV	1	G	A	70	34628	0.202149	61.4571	msh2	FALSE	CAN	JSY22	2	msh2-Rep2	CGC	G>A	A/T+1	G/C-1	CG>TA	CG>TA	TTGGCCGCACCAA	GCACCAA	GCG	GCG	C	T	C>T	C>T_GCG	CG>TA_GCACCAA	4	500	FALSE	FALSE
17_v.txt	32970	32970-SNV-C-T	SNV	1	C	T	539	34628	1.55654	59.7124	msh2	FALSE	CAN	JSY22	2	msh2-Rep2	ACC	C>T	A/T+1	G/C-1	CG>TA	CG>TA	GCCGCACCAAATG	CCAAATG	TGG	ACC	C	A	C>T	C>T_ACC	CG>TA_CCAAATG	4	497	FALSE	FALSE
17_v.txt	32999	32999-SNV-G-A	SNV	1	G	A	4	34627	0.0115517	46.2463	msh2	FALSE	CAN	JSY22	2	msh2-Rep2	AGA	G>A	A/T+1	G/C-1	CG>TA	CG>TA	TTGTGAGAAAACT	GAAAACT	TCT	TCT	C	T	C>T	C>T_TCT	CG>TA_GAAAACT	4	468	FALSE	FALSE
17_v.txt	33056	33056-SNV-C-T	SNV	1	C	T	31	34628	0.0895229	57.3871	msh2	FALSE	CAN	JSY22	2	msh2-Rep2	GCG	C>T	A/T+1	G/C-1	CG>TA	CG>TA	GGACTGCGTGACA	CGTGACA	CGC	GCG	C	A	C>T	C>T_GCG	CG>TA_CGTGACA	4	411	FALSE	FALSE
17_v.txt	33069	33069-SNV-G-A	SNV	1	G	A	27	34628	0.0779716	49.4812	msh2	FALSE	CAN	JSY22	2	msh2-Rep2	TGC	G>A	A/T+1	G/C-1	CG>TA	CG>TA	GAATATGCCAAAG	GCCAAAG	ACG	ACG	C	T	C>T	C>T_ACG	CG>TA_GCCAAAG	4	398	FALSE	FALSE
17_v.txt	33070	33070-SNV-C-T	SNV	1	C	T	49	34627	0.141508	47.0205	msh2	FALSE	CAN	JSY22	2	msh2-Rep2	GCC	C>T	A/T+1	G/C-1	CG>TA	CG>TA	AATATGCCAAAGA	CCAAAGA	CGG	GCC	C	A	C>T	C>T_GCC	CG>TA_CCAAAGA	4	397	FALSE	FALSE
17_v.txt	33104	33104-SNV-G-A	SNV	1	G	A	38	34628	0.109738	38.3421	msh2	FALSE	CAN	JSY22	2	msh2-Rep2	CGC	G>A	A/T+1	G/C-1	CG>TA	CG>TA	AAGAGCGCCCACT	GCCCACT	GCG	GCG	C	T	C>T	C>T_GCG	CG>TA_GCCCACT	4	363	FALSE	FALSE
17_v.txt	33111	33111-SNV-G-A	SNV	1	G	A	27	34628	0.0779716	46.7775	msh2	FALSE	CAN	JSY22	2	msh2-Rep2	TGG	G>A	A/T+1	G/C-1	CG>TA	CG>TA	CCCACTGGGCCGG	GGGCCGG	ACC	ACC	C	T	C>T	C>T_ACC	CG>TA_GGGCCGG	4	356	FALSE	FALSE
17_v.txt	33113	33113-SNV-G-A	SNV	1	G	A	29	34628	0.0837473	38.6547	msh2	FALSE	CAN	JSY22	2	msh2-Rep2	GGC	G>A	A/T+1	G/C-1	CG>TA	CG>TA	CACTGGGCCGGCG	GCCGGCG	CCG	CCG	C	T	C>T	C>T_CCG	CG>TA_GCCGGCG	4	354	FALSE	FALSE
17_v.txt	33114	33114-SNV-C-T	SNV	1	C	T	113	34628	0.326326	43.2745	msh2	FALSE	CAN	JSY22	2	msh2-Rep2	GCC	C>T	A/T+1	G/C-1	CG>TA	CG>TA	ACTGGGCCGGCGT	CCGGCGT	CGG	GCC	C	A	C>T	C>T_GCC	CG>TA_CCGGCGT	4	353	FALSE	FALSE
17_v.txt	33115	33115-SNV-C-T	SNV	1	C	T	333	34628	0.96165	43.6657	msh2	FALSE	CAN	JSY22	2	msh2-Rep2	CCG	C>T	A/T+1	G/C-1	CG>TA	CG>TA	CTGGGCCGGCGTT	CGGCGTT	GGC	CCG	C	A	C>T	C>T_CCG	CG>TA_CGGCGTT	4	352	FALSE	FALSE
17_v.txt	33118	33118-SNV-C-T	SNV	1	C	T	39	34628	0.112626	40.4615	msh2	FALSE	CAN	JSY22	2	msh2-Rep2	GCG	C>T	A/T+1	G/C-1	CG>TA	CG>TA	GGCCGGCGTTGGT	CGTTGGT	CGC	GCG	C	A	C>T	C>T_GCG	CG>TA_CGTTGGT	4	349	FALSE	FALSE
17_v.txt	33153	33153-SNV-C-T	SNV	1	C	T	227	34628	0.655539	36.6119	msh2	FALSE	CAN	JSY22	2	msh2-Rep2	ACC	C>T	A/T+1	G/C-1	CG>TA	CG>TA	AAAAGACCTGTAC	CCTGTAC	TGG	ACC	C	A	C>T	C>T_ACC	CG>TA_CCTGTAC	4	314	FALSE	FALSE
17_v.txt	33154	33154-SNV-C-T	SNV	1	C	T	21	34627	0.0606463	34.6667	msh2	FALSE	CAN	JSY22	2	msh2-Rep2	CCT	C>T	A/T+1	G/C-1	CG>TA	CG>TA	AAAGACCTGTACC	CTGTACC	GGA	CCT	C	A	C>T	C>T_CCT	CG>TA_CTGTACC	4	313	FALSE	FALSE
17_v.txt	33156	33156-SNV-G-A	SNV	1	G	A	36	34627	0.103965	36.1111	msh2	FALSE	CAN	JSY22	2	msh2-Rep2	TGT	G>A	A/T+1	G/C-1	CG>TA	CG>TA	AGACCTGTACCAA	GTACCAA	ACA	ACA	C	T	C>T	C>T_ACA	CG>TA_GTACCAA	4	311	FALSE	FALSE
17_v.txt	33159	33159-SNV-C-T	SNV	1	C	T	66	34627	0.190603	36.9242	msh2	FALSE	CAN	JSY22	2	msh2-Rep2	ACC	C>T	A/T+1	G/C-1	CG>TA	CG>TA	CCTGTACCAATAG	CCAATAG	TGG	ACC	C	A	C>T	C>T_ACC	CG>TA_CCAATAG	4	308	FALSE	FALSE
17_v.txt	33168	33168-SNV-C-T	SNV	1	C	T	41	34625	0.118412	37.4634	msh2	FALSE	CAN	JSY22	2	msh2-Rep2	ACC	C>T	A/T+1	G/C-1	CG>TA	CG>TA	ATAGTACCACCAA	CCACCAA	TGG	ACC	C	A	C>T	C>T_ACC	CG>TA_CCACCAA	4	299	FALSE	FALSE
17_v.txt	33177	33177-SNV-G-A	SNV	1	G	A	24	34617	0.0693301	35.5833	msh2	FALSE	CAN	JSY22	2	msh2-Rep2	GGC	G>A	A/T+1	G/C-1	CG>TA	CG>TA	CCAAGGGCAATCA	GCAATCA	CCG	CCG	C	T	C>T	C>T_CCG	CG>TA_GCAATCA	4	290	FALSE	FALSE
17_v.txt	33199	33199-SNV-G-A	SNV	1	G	A	31	24068	0.128802	37.3226	msh2	FALSE	CAN	JSY22	2	msh2-Rep2	TGC	G>A	A/T+1	G/C-1	CG>TA	CG>TA	GTCTTTGCTTAAG	GCTTAAG	ACG	ACG	C	T	C>T	C>T_ACG	CG>TA_GCTTAAG	4	268	FALSE	FALSE
17_v.txt	33258	33258-SNV-C-T	SNV	1	C	T	38	24068	0.157886	43.2105	msh2	FALSE	CAN	JSY22	2	msh2-Rep2	GCC	C>T	A/T+1	G/C-1	CG>TA	CG>TA	CCTATGCCATCCT	CCATCCT	CGG	GCC	C	A	C>T	C>T_GCC	CG>TA_CCATCCT	4	209	FALSE	FALSE
17_v.txt	33276	33276-SNV-G-A	SNV	1	G	A	52	24068	0.216055	50.1154	msh2	FALSE	CAN	JSY22	2	msh2-Rep2	CGT	G>A	A/T+1	G/C-1	CG>TA	CG>TA	GAGAACGTATCCT	GTATCCT	GCA	GCA	C	T	C>T	C>T_GCA	CG>TA_GTATCCT	4	191	FALSE	FALSE
17_v.txt	33309	33309-SNV-C-T	SNV	1	C	T	24	24068	0.0997175	55.4164	msh2	FALSE	CAN	JSY22	2	msh2-Rep2	GCG	C>T	A/T+1	G/C-1	CG>TA	CG>TA	AAAGAGCGCAATG	CGCAATG	CGC	GCG	C	A	C>T	C>T_GCG	CG>TA_CGCAATG	4	158	FALSE	FALSE
17_v.txt	33310	33310-SNV-G-A	SNV	1	G	A	24	24064	0.099734	57.9771	msh2	FALSE	CAN	JSY22	2	msh2-Rep2	CGC	G>A	A/T+1	G/C-1	CG>TA	CG>TA	AAGAGCGCAATGG	GCAATGG	GCG	GCG	C	T	C>T	C>T_GCG	CG>TA_GCAATGG	4	157	FALSE	FALSE
17_v.txt	33392	33392-SNV-G-A	SNV	1	G	A	24	24068	0.0997175	51.2917	msh2	FALSE	CAN	JSY22	2	msh2-Rep2	CGT	G>A	A/T+1	G/C-1	CG>TA	CG>TA	AACGTCGTGAAAG	GTGAAAG	GCA	GCA	C	T	C>T	C>T_GCA	CG>TA_GTGAAAG	4	75	FALSE	FALSE
17_v.txt	33412	33412-SNV-G-A	SNV	1	G	A	31	24068	0.128802	45.6774	msh2	FALSE	CAN	JSY22	2	msh2-Rep2	GGC	G>A	A/T+1	G/C-1	CG>TA	CG>TA	TGACCGGCTCATT	GCTCATT	CCG	CCG	C	T	C>T	C>T_CCG	CG>TA_GCTCATT	4	55	FALSE	FALSE
17_v.txt	33474	33474-SNV-C-T	SNV	1	C	T	26	24066	0.108036	33.908	msh2	FALSE	CAN	JSY22	2	msh2-Rep2	GCC	C>T	A/T+1	G/C-1	CG>TA	CG>TA	GCTATGCCTTTTT	CCTTTTT	CGG	GCC	C	A	C>T	C>T_GCC	CG>TA_CCTTTTT	4	N_A	FALSE	FALSE
17_v.txt	32064	32064-SNV-G-C	SNV	1	G	C	48	25123	0.19106	63.0417	msh2	FALSE	CAN	JSY22	2	msh2-Rep2	TGA	G>C	G/C+1	G/C-1	CG>GC	CG>GC	GAGATTGAGATAA	GAGATAA	ACT	ACT	C	G	C>G	C>G_ACT	CG>GC_GAGATAA	4	1403	FALSE	FALSE
17_v.txt	32557	32557-SNV-C-G	SNV	1	C	G	40	39767	0.100586	37.775	msh2	FALSE	CAN	JSY22	2	msh2-Rep2	CCA	C>G	G/C+1	G/C-1	CG>GC	CG>GC	TGATACCAACTAG	CAACTAG	GGT	CCA	C	C	C>G	C>G_CCA	CG>GC_CAACTAG	4	910	FALSE	FALSE
17_v.txt	32882	32882-SNV-C-G	SNV	1	C	G	2	34628	0.005776	37.9982	msh2	FALSE	CAN	JSY22	2	msh2-Rep2	TCC	C>G	G/C+1	G/C-1	CG>GC	CG>GC	GTACGTCCAAAAT	CCAAAAT	AGG	TCC	C	C	C>G	C>G_TCC	CG>GC_CCAAAAT	4	585	FALSE	FALSE
17_v.txt	32997	32997-SNV-G-C	SNV	1	G	C	8	34628	0.0231027	55	msh2	FALSE	CAN	JSY22	2	msh2-Rep2	TGA	G>C	G/C+1	G/C-1	CG>GC	CG>GC	CTTTGTGAGAAAA	GAGAAAA	ACT	ACT	C	G	C>G	C>G_ACT	CG>GC_GAGAAAA	4	470	FALSE	FALSE
17_v.txt	33070	33070-SNV-C-G	SNV	1	C	G	3	34627	0.008664	54.9997	msh2	FALSE	CAN	JSY22	2	msh2-Rep2	GCC	C>G	G/C+1	G/C-1	CG>GC	CG>GC	AATATGCCAAAGA	CCAAAGA	CGG	GCC	C	C	C>G	C>G_GCC	CG>GC_CCAAAGA	4	397	FALSE	FALSE
17_v.txt	33113	33113-SNV-G-C	SNV	1	G	C	1	34628	0.002888	57.9995	msh2	FALSE	CAN	JSY22	2	msh2-Rep2	GGC	G>C	G/C+1	G/C-1	CG>GC	CG>GC	CACTGGGCCGGCG	GCCGGCG	CCG	CCG	C	G	C>G	C>G_CCG	CG>GC_GCCGGCG	4	354	FALSE	FALSE
17_v.txt	33154	33154-SNV-C-G	SNV	1	C	G	2	34627	0.005776	38	msh2	FALSE	CAN	JSY22	2	msh2-Rep2	CCT	C>G	G/C+1	G/C-1	CG>GC	CG>GC	AAAGACCTGTACC	CTGTACC	GGA	CCT	C	C	C>G	C>G_CCT	CG>GC_CTGTACC	4	313	FALSE	FALSE
17_v.txt	33354	33354-SNV-G-C	SNV	1	G	C	37	24068	0.153731	51.7297	msh2	FALSE	CAN	JSY22	2	msh2-Rep2	TGA	G>C	G/C+1	G/C-1	CG>GC	CG>GC	GGTATTGACCCAC	GACCCAC	ACT	ACT	C	G	C>G	C>G_ACT	CG>GC_GACCCAC	4	113	FALSE	FALSE
17_v.txt	33451	33451-SNV-C-G	SNV	1	C	G	2	24068	0.00831	36.4936	msh2	FALSE	CAN	JSY22	2	msh2-Rep2	TCT	C>G	G/C+1	G/C-1	CG>GC	CG>GC	CGTCTTCTTTTGA	CTTTTGA	AGA	TCT	C	C	C>G	C>G_TCT	CG>GC_CTTTTGA	4	16	FALSE	FALSE
17_v.txt	31657	31657-SNV-G-T	SNV	1	G	T	144	16228	0.887355	18.0733	msh2	FALSE	CAN	JSY22	2	msh2-Rep2	GGC	G>T	A/T+1	G/C-1	CG>AT	CG>AT	GAAATGGCGTGGA	GCGTGGA	CCG	CCG	C	A	C>A	C>A_CCG	CG>AT_GCGTGGA	4	1810	FALSE	FALSE
17_v.txt	31869	31869-SNV-G-T	SNV	1	G	T	12	16228	0.0739463	47.6667	msh2	FALSE	CAN	JSY22	2	msh2-Rep2	AGA	G>T	A/T+1	G/C-1	CG>AT	CG>AT	AAAATAGAGATAT	GAGATAT	TCT	TCT	C	A	C>A	C>A_TCT	CG>AT_GAGATAT	4	1598	FALSE	FALSE
17_v.txt	31981	31981-SNV-G-T	SNV	1	G	T	32	25123	0.127373	30.0312	msh2	FALSE	CAN	JSY22	2	msh2-Rep2	GGC	G>T	A/T+1	G/C-1	CG>AT	CG>AT	AGCCGGGCATTAA	GCATTAA	CCG	CCG	C	A	C>A	C>A_CCG	CG>AT_GCATTAA	4	1486	FALSE	FALSE
17_v.txt	32058	32058-SNV-G-T	SNV	1	G	T	45	25123	0.179119	60.3474	msh2	FALSE	CAN	JSY22	2	msh2-Rep2	CGA	G>T	A/T+1	G/C-1	CG>AT	CG>AT	ATGTGCGAGATTG	GAGATTG	GCT	GCT	C	A	C>A	C>A_GCT	CG>AT_GAGATTG	4	1409	FALSE	FALSE
17_v.txt	32088	32088-SNV-C-A	SNV	1	C	A	16	25121	0.0636917	55.25	msh2	FALSE	CAN	JSY22	2	msh2-Rep2	GCC	C>A	A/T+1	G/C-1	CG>AT	CG>AT	AAAAAGCCTGCAA	CCTGCAA	CGG	GCC	C	T	C>A	C>A_GCC	CG>AT_CCTGCAA	4	1379	FALSE	FALSE
17_v.txt	32089	32089-SNV-C-A	SNV	1	C	A	131	25121	0.521476	60.763	msh2	FALSE	CAN	JSY22	2	msh2-Rep2	CCT	C>A	A/T+1	G/C-1	CG>AT	CG>AT	AAAAGCCTGCAAC	CTGCAAC	GGA	CCT	C	T	C>A	C>A_CCT	CG>AT_CTGCAAC	4	1378	FALSE	FALSE
17_v.txt	32188	32188-SNV-C-A	SNV	1	C	A	67	25123	0.266688	43.4925	msh2	FALSE	CAN	JSY22	2	msh2-Rep2	ACT	C>A	A/T+1	G/C-1	CG>AT	CG>AT	CGAAAACTGCAAT	CTGCAAT	TGA	ACT	C	T	C>A	C>A_ACT	CG>AT_CTGCAAT	4	1279	FALSE	FALSE
17_v.txt	32238	32238-SNV-G-T	SNV	1	G	T	16	25123	0.0636867	37.25	msh2	FALSE	CAN	JSY22	2	msh2-Rep2	AGC	G>T	A/T+1	G/C-1	CG>AT	CG>AT	TTAGGAGCCAACT	GCCAACT	TCG	TCG	C	A	C>A	C>A_TCG	CG>AT_GCCAACT	4	1229	FALSE	FALSE
17_v.txt	32271	32271-SNV-C-A	SNV	1	C	A	20	39775	0.0502828	31.05	msh2	FALSE	CAN	JSY22	2	msh2-Rep2	ACG	C>A	A/T+1	G/C-1	CG>AT	CG>AT	AAAATACGGGAAC	CGGGAAC	TGC	ACG	C	T	C>A	C>A_ACG	CG>AT_CGGGAAC	4	1196	FALSE	FALSE
17_v.txt	32274	32274-SNV-G-T	SNV	1	G	T	53	39775	0.13325	34.8302	msh2	FALSE	CAN	JSY22	2	msh2-Rep2	GGA	G>T	A/T+1	G/C-1	CG>AT	CG>AT	ATACGGGAACCAA	GAACCAA	CCT	CCT	C	A	C>A	C>A_CCT	CG>AT_GAACCAA	4	1193	FALSE	FALSE
17_v.txt	32282	32282-SNV-G-T	SNV	1	G	T	93	39775	0.233815	45.086	msh2	FALSE	CAN	JSY22	2	msh2-Rep2	CGT	G>T	A/T+1	G/C-1	CG>AT	CG>AT	ACCAACGTAAATA	GTAAATA	GCA	GCA	C	A	C>A	C>A_GCA	CG>AT_GTAAATA	4	1185	FALSE	FALSE
17_v.txt	32301	32301-SNV-G-T	SNV	1	G	T	35	39775	0.087995	46.5429	msh2	FALSE	CAN	JSY22	2	msh2-Rep2	GGC	G>T	A/T+1	G/C-1	CG>AT	CG>AT	TTTGCGGCAGAAA	GCAGAAA	CCG	CCG	C	A	C>A	C>A_CCG	CG>AT_GCAGAAA	4	1166	FALSE	FALSE
17_v.txt	32373	32373-SNV-G-T	SNV	1	G	T	47	39775	0.118165	56.4468	msh2	FALSE	CAN	JSY22	2	msh2-Rep2	AGC	G>T	A/T+1	G/C-1	CG>AT	CG>AT	TCAATAGCAATAA	GCAATAA	TCG	TCG	C	A	C>A	C>A_TCG	CG>AT_GCAATAA	4	1094	FALSE	FALSE
17_v.txt	32399	32399-SNV-G-T	SNV	1	G	T	62	39775	0.155877	59.3065	msh2	FALSE	CAN	JSY22	2	msh2-Rep2	CGT	G>T	A/T+1	G/C-1	CG>AT	CG>AT	AGAAACGTAGGAA	GTAGGAA	GCA	GCA	C	A	C>A	C>A_GCA	CG>AT_GTAGGAA	4	1068	FALSE	FALSE
17_v.txt	32488	32488-SNV-G-T	SNV	1	G	T	101	39775	0.253928	47.7445	msh2	FALSE	CAN	JSY22	2	msh2-Rep2	CGG	G>T	A/T+1	G/C-1	CG>AT	CG>AT	AGATACGGAAAAC	GGAAAAC	GCC	GCC	C	A	C>A	C>A_GCC	CG>AT_GGAAAAC	4	979	FALSE	FALSE
17_v.txt	32529	32529-SNV-G-T	SNV	1	G	T	44	39775	0.110622	43.6724	msh2	FALSE	CAN	JSY22	2	msh2-Rep2	GGG	G>T	A/T+1	G/C-1	CG>AT	CG>AT	TTTCTGGGGTTTG	GGGTTTG	CCC	CCC	C	A	C>A	C>A_CCC	CG>AT_GGGTTTG	4	938	FALSE	FALSE
17_v.txt	32530	32530-SNV-G-T	SNV	1	G	T	2351	39775	5.91075	39.6655	msh2	FALSE	CAN	JSY22	2	msh2-Rep2	GGG	G>T	A/T+1	G/C-1	CG>AT	CG>AT	TTCTGGGGTTTGC	GGTTTGC	CCC	CCC	C	A	C>A	C>A_CCC	CG>AT_GGTTTGC	4	937	FALSE	FALSE
17_v.txt	32535	32535-SNV-G-T	SNV	1	G	T	9	39774	0.0226278	31.7786	msh2	FALSE	CAN	JSY22	2	msh2-Rep2	TGC	G>T	A/T+1	G/C-1	CG>AT	CG>AT	GGGTTTGCAGCTT	GCAGCTT	ACG	ACG	C	A	C>A	C>A_ACG	CG>AT_GCAGCTT	4	932	FALSE	FALSE
17_v.txt	32538	32538-SNV-G-T	SNV	1	G	T	26	39774	0.0653693	35.8027	msh2	FALSE	CAN	JSY22	2	msh2-Rep2	AGC	G>T	A/T+1	G/C-1	CG>AT	CG>AT	TTTGCAGCTTCAC	GCTTCAC	TCG	TCG	C	A	C>A	C>A_TCG	CG>AT_GCTTCAC	4	929	FALSE	FALSE
17_v.txt	32539	32539-SNV-C-A	SNV	1	C	A	1465	39773	3.6834	37.7045	msh2	FALSE	CAN	JSY22	2	msh2-Rep2	GCT	C>A	A/T+1	G/C-1	CG>AT	CG>AT	TTGCAGCTTCACC	CTTCACC	CGA	GCT	C	T	C>A	C>A_GCT	CG>AT_CTTCACC	4	928	FALSE	FALSE
17_v.txt	32547	32547-SNV-G-T	SNV	1	G	T	63	39771	0.158407	37.3333	msh2	FALSE	CAN	JSY22	2	msh2-Rep2	AGC	G>T	A/T+1	G/C-1	CG>AT	CG>AT	TCACCAGCAGTGA	GCAGTGA	TCG	TCG	C	A	C>A	C>A_TCG	CG>AT_GCAGTGA	4	920	FALSE	FALSE
17_v.txt	32556	32556-SNV-C-A	SNV	1	C	A	53	39767	0.133276	37.3773	msh2	FALSE	CAN	JSY22	2	msh2-Rep2	ACC	C>A	A/T+1	G/C-1	CG>AT	CG>AT	GTGATACCAACTA	CCAACTA	TGG	ACC	C	T	C>A	C>A_ACC	CG>AT_CCAACTA	4	911	FALSE	FALSE
17_v.txt	32566	32566-SNV-C-A	SNV	1	C	A	4	32627	0.0122598	37.2497	msh2	FALSE	CAN	JSY22	2	msh2-Rep2	TCA	C>A	A/T+1	G/C-1	CG>AT	CG>AT	CTAGTTCAGTACC	CAGTACC	AGT	TCA	C	T	C>A	C>A_TCA	CG>AT_CAGTACC	4	901	FALSE	FALSE
17_v.txt	32572	32572-SNV-C-A	SNV	1	C	A	50	32639	0.153191	35.28	msh2	FALSE	CAN	JSY22	2	msh2-Rep2	CCT	C>A	A/T+1	G/C-1	CG>AT	CG>AT	CAGTACCTTGAAA	CTTGAAA	GGA	CCT	C	T	C>A	C>A_CCT	CG>AT_CTTGAAA	4	895	FALSE	FALSE
17_v.txt	32575	32575-SNV-G-T	SNV	1	G	T	20	32639	0.0612764	32.15	msh2	FALSE	CAN	JSY22	2	msh2-Rep2	TGA	G>T	A/T+1	G/C-1	CG>AT	CG>AT	TACCTTGAAATGT	GAAATGT	ACT	ACT	C	A	C>A	C>A_ACT	CG>AT_GAAATGT	4	892	FALSE	FALSE
17_v.txt	32629	32629-SNV-C-A	SNV	1	C	A	21	32639	0.0643402	52.4762	msh2	FALSE	CAN	JSY22	2	msh2-Rep2	TCG	C>A	A/T+1	G/C-1	CG>AT	CG>AT	TCCCTTCGTTTTT	CGTTTTT	AGC	TCG	C	T	C>A	C>A_TCG	CG>AT_CGTTTTT	4	838	FALSE	FALSE
17_v.txt	32652	32652-SNV-C-A	SNV	1	C	A	93	32639	0.284935	59.2258	msh2	FALSE	CAN	JSY22	2	msh2-Rep2	ACC	C>A	A/T+1	G/C-1	CG>AT	CG>AT	ATTATACCTGGAC	CCTGGAC	TGG	ACC	C	T	C>A	C>A_ACC	CG>AT_CCTGGAC	4	815	FALSE	FALSE
17_v.txt	32692	32692-SNV-C-A	SNV	1	C	A	99	32645	0.303262	61.7778	msh2	FALSE	CAN	JSY22	2	msh2-Rep2	CCA	C>A	A/T+1	G/C-1	CG>AT	CG>AT	GGAATCCAACTGG	CAACTGG	GGT	CCA	C	T	C>A	C>A_CCA	CG>AT_CAACTGG	4	775	FALSE	FALSE
17_v.txt	32811	32811-SNV-G-T	SNV	1	G	T	21	32645	0.0643284	44.6184	msh2	FALSE	CAN	JSY22	2	msh2-Rep2	AGG	G>T	A/T+1	G/C-1	CG>AT	CG>AT	TTGACAGGGAACA	GGGAACA	TCC	TCC	C	A	C>A	C>A_TCC	CG>AT_GGGAACA	4	656	FALSE	FALSE
17_v.txt	32819	32819-SNV-G-T	SNV	1	G	T	807	32645	2.47205	44.0881	msh2	FALSE	CAN	JSY22	2	msh2-Rep2	AGT	G>T	A/T+1	G/C-1	CG>AT	CG>AT	GAACAAGTTCATT	GTTCATT	TCA	TCA	C	A	C>A	C>A_TCA	CG>AT_GTTCATT	4	648	FALSE	FALSE
17_v.txt	32855	32855-SNV-C-A	SNV	1	C	A	5	32645	0.0153163	34.4	msh2	FALSE	CAN	JSY22	2	msh2-Rep2	TCC	C>A	A/T+1	G/C-1	CG>AT	CG>AT	ACTAATCCATGCC	CCATGCC	AGG	TCC	C	T	C>A	C>A_TCC	CG>AT_CCATGCC	4	612	FALSE	FALSE
17_v.txt	32856	32856-SNV-C-A	SNV	1	C	A	4	32645	0.012253	37.9985	msh2	FALSE	CAN	JSY22	2	msh2-Rep2	CCA	C>A	A/T+1	G/C-1	CG>AT	CG>AT	CTAATCCATGCCG	CATGCCG	GGT	CCA	C	T	C>A	C>A_CCA	CG>AT_CATGCCG	4	611	FALSE	FALSE
17_v.txt	32883	32883-SNV-C-A	SNV	1	C	A	4	34628	0.0115513	29.7429	msh2	FALSE	CAN	JSY22	2	msh2-Rep2	CCA	C>A	A/T+1	G/C-1	CG>AT	CG>AT	TACGTCCAAAATT	CAAAATT	GGT	CCA	C	T	C>A	C>A_CCA	CG>AT_CAAAATT	4	584	FALSE	FALSE
17_v.txt	32917	32917-SNV-C-A	SNV	1	C	A	169	34628	0.488044	54.8935	msh2	FALSE	CAN	JSY22	2	msh2-Rep2	TCC	C>A	A/T+1	G/C-1	CG>AT	CG>AT	TAAGTTCCAGGGC	CCAGGGC	AGG	TCC	C	T	C>A	C>A_TCC	CG>AT_CCAGGGC	4	550	FALSE	FALSE
17_v.txt	32940	32940-SNV-G-T	SNV	1	G	T	142	34628	0.410073	53.8433	msh2	FALSE	CAN	JSY22	2	msh2-Rep2	AGA	G>T	A/T+1	G/C-1	CG>AT	CG>AT	GCCCAAGAAAACC	GAAAACC	TCT	TCT	C	A	C>A	C>A_TCT	CG>AT_GAAAACC	4	527	FALSE	FALSE
17_v.txt	32999	32999-SNV-G-T	SNV	1	G	T	3	34627	0.008664	63.993	msh2	FALSE	CAN	JSY22	2	msh2-Rep2	AGA	G>T	A/T+1	G/C-1	CG>AT	CG>AT	TTGTGAGAAAACT	GAAAACT	TCT	TCT	C	A	C>A	C>A_TCT	CG>AT_GAAAACT	4	468	FALSE	FALSE
17_v.txt	33004	33004-SNV-C-A	SNV	1	C	A	31	34628	0.0895229	60.0645	msh2	FALSE	CAN	JSY22	2	msh2-Rep2	ACT	C>A	A/T+1	G/C-1	CG>AT	CG>AT	AGAAAACTGTGAA	CTGTGAA	TGA	ACT	C	T	C>A	C>A_ACT	CG>AT_CTGTGAA	4	463	FALSE	FALSE
17_v.txt	33006	33006-SNV-G-T	SNV	1	G	T	31	34628	0.0895229	63.871	msh2	FALSE	CAN	JSY22	2	msh2-Rep2	TGT	G>T	A/T+1	G/C-1	CG>AT	CG>AT	AAAACTGTGAAAG	GTGAAAG	ACA	ACA	C	A	C>A	C>A_ACA	CG>AT_GTGAAAG	4	461	FALSE	FALSE
17_v.txt	33008	33008-SNV-G-T	SNV	1	G	T	35	34628	0.101074	54.7714	msh2	FALSE	CAN	JSY22	2	msh2-Rep2	TGA	G>T	A/T+1	G/C-1	CG>AT	CG>AT	AACTGTGAAAGAG	GAAAGAG	ACT	ACT	C	A	C>A	C>A_ACT	CG>AT_GAAAGAG	4	459	FALSE	FALSE
17_v.txt	33024	33024-SNV-G-T	SNV	1	G	T	76	34628	0.219476	61.4211	msh2	FALSE	CAN	JSY22	2	msh2-Rep2	AGG	G>T	A/T+1	G/C-1	CG>AT	CG>AT	GTAACAGGGATGA	GGGATGA	TCC	TCC	C	A	C>A	C>A_TCC	CG>AT_GGGATGA	4	443	FALSE	FALSE
17_v.txt	33051	33051-SNV-G-T	SNV	1	G	T	48	34628	0.138616	57.2083	msh2	FALSE	CAN	JSY22	2	msh2-Rep2	GGA	G>T	A/T+1	G/C-1	CG>AT	CG>AT	CCCAAGGACTGCG	GACTGCG	CCT	CCT	C	A	C>A	C>A_CCT	CG>AT_GACTGCG	4	416	FALSE	FALSE
17_v.txt	33112	33112-SNV-G-T	SNV	1	G	T	39	34628	0.112626	43.1501	msh2	FALSE	CAN	JSY22	2	msh2-Rep2	GGG	G>T	A/T+1	G/C-1	CG>AT	CG>AT	CCACTGGGCCGGC	GGCCGGC	CCC	CCC	C	A	C>A	C>A_CCC	CG>AT_GGCCGGC	4	355	FALSE	FALSE
17_v.txt	33154	33154-SNV-C-A	SNV	1	C	A	483	34627	1.39487	37.5507	msh2	FALSE	CAN	JSY22	2	msh2-Rep2	CCT	C>A	A/T+1	G/C-1	CG>AT	CG>AT	AAAGACCTGTACC	CTGTACC	GGA	CCT	C	T	C>A	C>A_CCT	CG>AT_CTGTACC	4	313	FALSE	FALSE
17_v.txt	33169	33169-SNV-C-A	SNV	1	C	A	64	34625	0.184838	37.4661	msh2	FALSE	CAN	JSY22	2	msh2-Rep2	CCA	C>A	A/T+1	G/C-1	CG>AT	CG>AT	TAGTACCACCAAG	CACCAAG	GGT	CCA	C	T	C>A	C>A_CCA	CG>AT_CACCAAG	4	298	FALSE	FALSE
17_v.txt	33177	33177-SNV-G-T	SNV	1	G	T	30	34617	0.0866626	37.4667	msh2	FALSE	CAN	JSY22	2	msh2-Rep2	GGC	G>T	A/T+1	G/C-1	CG>AT	CG>AT	CCAAGGGCAATCA	GCAATCA	CCG	CCG	C	A	C>A	C>A_CCG	CG>AT_GCAATCA	4	290	FALSE	FALSE
17_v.txt	33208	33208-SNV-C-A	SNV	1	C	A	25	24068	0.103872	40.2791	msh2	FALSE	CAN	JSY22	2	msh2-Rep2	TCT	C>A	A/T+1	G/C-1	CG>AT	CG>AT	TAAGCTCTCTCTT	CTCTCTT	AGA	TCT	C	T	C>A	C>A_TCT	CG>AT_CTCTCTT	4	259	FALSE	FALSE
17_v.txt	33238	33238-SNV-C-A	SNV	1	C	A	33	24068	0.137112	38.3939	msh2	FALSE	CAN	JSY22	2	msh2-Rep2	CCT	C>A	A/T+1	G/C-1	CG>AT	CG>AT	CTTCTCCTTCATC	CTTCATC	GGA	CCT	C	T	C>A	C>A_CCT	CG>AT_CTTCATC	4	229	FALSE	FALSE
17_v.txt	33310	33310-SNV-G-T	SNV	1	G	T	7	24064	0.0290891	19.3782	msh2	FALSE	CAN	JSY22	2	msh2-Rep2	CGC	G>T	A/T+1	G/C-1	CG>AT	CG>AT	AAGAGCGCAATGG	GCAATGG	GCG	GCG	C	A	C>A	C>A_GCG	CG>AT_GCAATGG	4	157	FALSE	FALSE
17_v.txt	33354	33354-SNV-G-T	SNV	1	G	T	127	24068	0.527672	20.9528	msh2	FALSE	CAN	JSY22	2	msh2-Rep2	TGA	G>T	A/T+1	G/C-1	CG>AT	CG>AT	GGTATTGACCCAC	GACCCAC	ACT	ACT	C	A	C>A	C>A_ACT	CG>AT_GACCCAC	4	113	FALSE	FALSE
17_v.txt	33451	33451-SNV-C-A	SNV	1	C	A	53	24068	0.220209	40.1831	msh2	FALSE	CAN	JSY22	2	msh2-Rep2	TCT	C>A	A/T+1	G/C-1	CG>AT	CG>AT	CGTCTTCTTTTGA	CTTTTGA	AGA	TCT	C	T	C>A	C>A_TCT	CG>AT_CTTTTGA	4	16	FALSE	FALSE
17_v.txt	33474	33474-SNV-C-A	SNV	1	C	A	69	24066	0.286712	34.6277	msh2	FALSE	CAN	JSY22	2	msh2-Rep2	GCC	C>A	A/T+1	G/C-1	CG>AT	CG>AT	GCTATGCCTTTTT	CCTTTTT	CGG	GCC	C	T	C>A	C>A_GCC	CG>AT_CCTTTTT	4	N_A	FALSE	FALSE
17_v.txt	33475	33475-SNV-C-A	SNV	1	C	A	20	24065	0.0831082	36.2499	msh2	FALSE	CAN	JSY22	2	msh2-Rep2	CCT	C>A	A/T+1	G/C-1	CG>AT	CG>AT	CTATGCCTTTTTT	CTTTTTT	GGA	CCT	C	T	C>A	C>A_CCT	CG>AT_CTTTTTT	4	N_A	FALSE	FALSE
17_v.txt	33206	33206-Replacement-CT-A	Replacement	2	CT	A	1	24068	0.004155	63	msh2	FALSE	CAN	JSY22	2	msh2-Rep2	GCT	nope	A/T+1	>1bpdel	none	Replac.	CTTAAGCTCTCTC	CTCTCTC	CGA	GCT	CT	T	NA	NA_GCT	Replac._CTCTCTC	4	261	FALSE	FALSE
17_v.txt	33168	33168-MNV-CC-AA	MNV	2	CC	AA	1	34625	0.002888	34	msh2	FALSE	CAN	JSY22	2	msh2-Rep2	ACC	nope	>1bp-ins	>1bpdel	none	MNV	ATAGTACCACCAA	CCACCAA	TGG	ACC	CC	none	NA	NA_ACC	MNV_CCACCAA	4	299	FALSE	FALSE
17_v.txt	31846	31846-Insertion---A	Insertion	1	-	A	3	16228	0.0184866	64	msh2	FALSE	CAN	JSY22	2	msh2-Rep2	CAA	nope	A/T+1	>1bpdel	none	A/T+1	AGATCCAAACAGC	AAACAGC	GTT	CAA	-	T	NA	NA_CAA	A/T+1_AAACAGC	4	1621	FALSE	FALSE
17_v.txt	31904	31904-Insertion---T	Insertion	1	-	T	14	16228	0.0862706	39.7143	msh2	FALSE	CAN	JSY22	2	msh2-Rep2	ATT	nope	A/T+1	>1bpdel	none	A/T+1	ATTGAATTTTGGT	TTTTGGT	TAA	ATT	-	A	NA	NA_ATT	A/T+1_TTTTGGT	4	1563	FALSE	FALSE
17_v.txt	32081	32081-Insertion---A	Insertion	1	-	A	577	25123	2.2967	63.2946	msh2	FALSE	CAN	JSY22	2	msh2-Rep2	CAA	nope	A/T+1	>1bpdel	none	A/T+1	CCATGCAAAAAAG	AAAAAAG	GTT	CAA	-	T	NA	NA_CAA	A/T+1_AAAAAAG	4	1386	FALSE	FALSE
17_v.txt	32168	32168-Insertion---A	Insertion	1	-	A	2	25123	0.007961	37.5	msh2	FALSE	CAN	JSY22	2	msh2-Rep2	CAA	nope	A/T+1	>1bpdel	none	A/T+1	AGCGCCAAATGCA	AAATGCA	GTT	CAA	-	T	NA	NA_CAA	A/T+1_AAATGCA	4	1299	FALSE	FALSE
17_v.txt	32352	32352-Insertion---T	Insertion	1	-	T	29	39775	0.0729101	62.2759	msh2	FALSE	CAN	JSY22	2	msh2-Rep2	CTT	nope	A/T+1	>1bpdel	none	A/T+1	AAAACCTTTGTAC	TTTGTAC	GAA	CTT	-	A	NA	NA_CTT	A/T+1_TTTGTAC	4	1115	FALSE	FALSE
17_v.txt	32498	32498-Insertion---T	Insertion	1	-	T	108	39775	0.271527	44.6389	msh2	FALSE	CAN	JSY22	2	msh2-Rep2	CTT	nope	A/T+1	>1bpdel	none	A/T+1	AACAACTTTTTTG	TTTTTTG	GAA	CTT	-	A	NA	NA_CTT	A/T+1_TTTTTTG	4	969	FALSE	FALSE
17_v.txt	32631	32631-Insertion---T	Insertion	1	-	T	97	32639	0.29719	53.268	msh2	FALSE	CAN	JSY22	2	msh2-Rep2	GTT	nope	A/T+1	>1bpdel	none	A/T+1	CCTTCGTTTTTAT	TTTTTAT	CAA	GTT	-	A	NA	NA_GTT	A/T+1_TTTTTAT	4	836	FALSE	FALSE
17_v.txt	32658	32658-Insertion---C	Insertion	1	-	C	42	32645	0.128657	58.0476	msh2	FALSE	CAN	JSY22	2	msh2-Rep2	ACC	nope	G/C+1	>1bpdel	none	G/C+1	CCTGGACCCCAGG	CCCCAGG	TGG	ACC	-	G	NA	NA_ACC	G/C+1_CCCCAGG	4	809	FALSE	FALSE
17_v.txt	32680	32680-Insertion---A	Insertion	1	-	A	19	32645	0.0582019	62.6316	msh2	FALSE	CAN	JSY22	2	msh2-Rep2	CAA	nope	A/T+1	>1bpdel	none	A/T+1	TTCTCCAATAACG	AATAACG	GTT	CAA	-	T	NA	NA_CAA	A/T+1_AATAACG	4	787	FALSE	FALSE
17_v.txt	32728	32728-Insertion---A	Insertion	1	-	A	74	32645	0.226681	60.8784	msh2	FALSE	CAN	JSY22	2	msh2-Rep2	CAA	nope	A/T+1	>1bpdel	none	A/T+1	CCATACAAAAACA	AAAAACA	GTT	CAA	-	T	NA	NA_CAA	A/T+1_AAAAACA	4	739	FALSE	FALSE
17_v.txt	32799	32799-Insertion---T	Insertion	1	-	T	1	32645	0.003063	11	msh2	FALSE	CAN	JSY22	2	msh2-Rep2	GTA	nope	A/T+1	>1bpdel	none	A/T+1	TCACCGTAATATT	TAATATT	CAT	GTA	-	A	NA	NA_GTA	A/T+1_TAATATT	4	668	FALSE	FALSE
17_v.txt	32842	32842-Insertion---A	Insertion	1	-	A	1068	32645	3.27156	42.6086	msh2	FALSE	CAN	JSY22	2	msh2-Rep2	CAA	nope	A/T+1	>1bpdel	none	A/T+1	TTACCCAAAAAAT	AAAAAAT	GTT	CAA	-	T	NA	NA_CAA	A/T+1_AAAAAAT	4	625	FALSE	FALSE
17_v.txt	32842	32842-Insertion---AA	Insertion	2	-	AA	3	32645	0.00919	46.1667	msh2	FALSE	CAN	JSY22	2	msh2-Rep2	CAA	nope	>1bp-ins	>1bpdel	none	>1bp-ins	TTACCCAAAAAAT	AAAAAAT	GTT	CAA	-	none	NA	NA_CAA	>1bp-ins_AAAAAAT	4	625	FALSE	FALSE
17_v.txt	32884	32884-Insertion---A	Insertion	1	-	A	1	34628	0.002888	38	msh2	FALSE	CAN	JSY22	2	msh2-Rep2	CAA	nope	A/T+1	>1bpdel	none	A/T+1	ACGTCCAAAATTG	AAAATTG	GTT	CAA	-	T	NA	NA_CAA	A/T+1_AAAATTG	4	583	FALSE	FALSE
17_v.txt	32961	32961-Insertion---T	Insertion	1	-	T	40	34628	0.115513	60.3	msh2	FALSE	CAN	JSY22	2	msh2-Rep2	ATT	nope	A/T+1	>1bpdel	none	A/T+1	TAACCATTGGCCG	TTGGCCG	TAA	ATT	-	A	NA	NA_ATT	A/T+1_TTGGCCG	4	506	FALSE	FALSE
17_v.txt	33110	33110-Insertion---T	Insertion	1	-	T	32	34628	0.0924108	47	msh2	FALSE	CAN	JSY22	2	msh2-Rep2	CTG	nope	A/T+1	>1bpdel	none	A/T+1	GCCCACTGGGCCG	TGGGCCG	GAC	CTG	-	A	NA	NA_CTG	A/T+1_TGGGCCG	4	357	FALSE	FALSE
17_v.txt	33143	33143-Insertion---A	Insertion	1	-	A	36	34628	0.103962	40.4722	msh2	FALSE	CAN	JSY22	2	msh2-Rep2	CAA	nope	A/T+1	>1bpdel	none	A/T+1	TAAACCAATGAAA	AATGAAA	GTT	CAA	-	T	NA	NA_CAA	A/T+1_AATGAAA	4	324	FALSE	FALSE
17_v.txt	33206	33206-Insertion---CT	Insertion	2	-	CT	23	24068	0.0955626	37.5217	msh2	FALSE	CAN	JSY22	2	msh2-Rep2	GCT	nope	>1bp-ins	>1bpdel	none	>1bp-ins	CTTAAGCTCTCTC	CTCTCTC	CGA	GCT	-	none	NA	NA_GCT	>1bp-ins_CTCTCTC	4	261	FALSE	FALSE
17_v.txt	33331	33331-Insertion---T	Insertion	1	-	T	10	24068	0.0415489	61	msh2	FALSE	CAN	JSY22	2	msh2-Rep2	CTT	nope	A/T+1	>1bpdel	none	A/T+1	CTTTACTTTTCTC	TTTTCTC	GAA	CTT	-	A	NA	NA_CTT	A/T+1_TTTTCTC	4	136	FALSE	FALSE
17_v.txt	32642	32642-Deletion-AG--	Deletion	2	AG	-	11	32639	0.033702	56.3636	msh2	FALSE	CAN	JSY22	2	msh2-Rep2	TAG	nope	>1bp-ins	>1bpdel	none	>1bpdel	ATCCTTAGATATT	AGATATT	ATC	TAG	AG	none	NA	NA_TAG	>1bpdel_AGATATT	4	825	FALSE	FALSE
17_v.txt	33206	33206-Deletion-CT--	Deletion	2	CT	-	5	24068	0.0207745	48.4	msh2	FALSE	CAN	JSY22	2	msh2-Rep2	GCT	nope	>1bp-ins	>1bpdel	none	>1bpdel	CTTAAGCTCTCTC	CTCTCTC	CGA	GCT	CT	none	NA	NA_GCT	>1bpdel_CTCTCTC	4	261	FALSE	FALSE
17_v.txt	33368	33368-Deletion-GT--	Deletion	2	GT	-	13	24068	0.0540136	57.1538	msh2	FALSE	CAN	JSY22	2	msh2-Rep2	GGT	nope	>1bp-ins	>1bpdel	none	>1bpdel	TCTGTGGTGTGTT	GTGTGTT	CCA	GGT	GT	none	NA	NA_GGT	>1bpdel_GTGTGTT	4	99	FALSE	FALSE
17_v.txt	31723	31723-Deletion-A--	Deletion	1	A	-	18	16228	0.110919	61.3889	msh2	FALSE	CAN	JSY22	2	msh2-Rep2	CAA	nope	>1bp-ins	A/T-1	none	A/T-1	TGTCCCAAAAAGT	AAAAAGT	GTT	GTT	T	none	T>none	T>none_GTT	A/T-1_AAAAAGT	4	1744	FALSE	FALSE
17_v.txt	31835	31835-Deletion-A--	Deletion	1	A	-	21	16228	0.129406	52.0952	msh2	FALSE	CAN	JSY22	2	msh2-Rep2	GAA	nope	>1bp-ins	A/T-1	none	A/T-1	GCATTGAAATAAG	AAATAAG	CTT	CTT	T	none	T>none	T>none_CTT	A/T-1_AAATAAG	4	1632	FALSE	FALSE
17_v.txt	31846	31846-Deletion-A--	Deletion	1	A	-	10	16228	0.0616219	58	msh2	FALSE	CAN	JSY22	2	msh2-Rep2	CAA	nope	>1bp-ins	A/T-1	none	A/T-1	AGATCCAAACAGC	AAACAGC	GTT	GTT	T	none	T>none	T>none_GTT	A/T-1_AAACAGC	4	1621	FALSE	FALSE
17_v.txt	31863	31863-Deletion-A--	Deletion	1	A	-	72	16228	0.443678	45.8056	msh2	FALSE	CAN	JSY22	2	msh2-Rep2	GAA	nope	>1bp-ins	A/T-1	none	A/T-1	AACAGGAAAATAG	AAAATAG	CTT	CTT	T	none	T>none	T>none_CTT	A/T-1_AAAATAG	4	1604	FALSE	FALSE
17_v.txt	31904	31904-Deletion-T--	Deletion	1	T	-	21	16228	0.129406	42.381	msh2	FALSE	CAN	JSY22	2	msh2-Rep2	ATT	nope	>1bp-ins	A/T-1	none	A/T-1	ATTGAATTTTGGT	TTTTGGT	TAA	ATT	T	none	nope	nope_ATT	A/T-1_TTTTGGT	4	1563	FALSE	FALSE
17_v.txt	31913	31913-Deletion-A--	Deletion	1	A	-	169	16228	1.04141	39.1479	msh2	FALSE	CAN	JSY22	2	msh2-Rep2	CAA	nope	>1bp-ins	A/T-1	none	A/T-1	TGGTGCAAAAGCC	AAAAGCC	GTT	GTT	T	none	T>none	T>none_GTT	A/T-1_AAAAGCC	4	1554	FALSE	FALSE
17_v.txt	31923	31923-Deletion-A--	Deletion	1	A	-	10	16226	0.0616295	37.8	msh2	FALSE	CAN	JSY22	2	msh2-Rep2	GAA	nope	>1bp-ins	A/T-1	none	A/T-1	GCCGTGAAACCTT	AAACCTT	CTT	CTT	T	none	T>none	T>none_CTT	A/T-1_AAACCTT	4	1544	FALSE	FALSE
17_v.txt	31958	31958-Deletion-G--	Deletion	1	G	-	53	25123	0.210962	36.7736	msh2	FALSE	CAN	JSY22	2	msh2-Rep2	TGG	nope	>1bp-ins	G/C-1	none	G/C-1	AAATGTGGCCGCA	GGCCGCA	ACC	ACC	C	none	C>none	C>none_ACC	G/C-1_GGCCGCA	4	1509	FALSE	FALSE
17_v.txt	31972	31972-Deletion-C--	Deletion	1	C	-	7	25123	0.0278629	37.8571	msh2	FALSE	CAN	JSY22	2	msh2-Rep2	GCC	nope	>1bp-ins	G/C-1	none	G/C-1	AATAAGCCAAGCC	CCAAGCC	CGG	GCC	C	none	nope	nope_GCC	G/C-1_CCAAGCC	4	1495	FALSE	FALSE
17_v.txt	31979	31979-Deletion-G--	Deletion	1	G	-	13	25123	0.0517454	46.9231	msh2	FALSE	CAN	JSY22	2	msh2-Rep2	CGG	nope	>1bp-ins	G/C-1	none	G/C-1	CAAGCCGGGCATT	GGGCATT	GCC	GCC	C	none	C>none	C>none_GCC	G/C-1_GGGCATT	4	1488	FALSE	FALSE
17_v.txt	32014	32014-Deletion-G--	Deletion	1	G	-	20	25123	0.0796083	58.05	msh2	FALSE	CAN	JSY22	2	msh2-Rep2	CGA	nope	>1bp-ins	G/C-1	none	G/C-1	CGTCACGAGAGAT	GAGAGAT	GCT	GCT	C	none	C>none	C>none_GCT	G/C-1_GAGAGAT	4	1453	FALSE	FALSE
17_v.txt	32030	32030-Deletion-T--	Deletion	1	T	-	77	25123	0.306492	60.4545	msh2	FALSE	CAN	JSY22	2	msh2-Rep2	ATT	nope	>1bp-ins	A/T-1	none	A/T-1	ACGGTATTTCAAA	TTTCAAA	TAA	ATT	T	none	nope	nope_ATT	A/T-1_TTTCAAA	4	1437	FALSE	FALSE
17_v.txt	32045	32045-Deletion-A--	Deletion	1	A	-	13	25123	0.0517454	61.8462	msh2	FALSE	CAN	JSY22	2	msh2-Rep2	TAA	nope	>1bp-ins	A/T-1	none	A/T-1	TTGCATAAATCTG	AAATCTG	ATT	ATT	T	none	T>none	T>none_ATT	A/T-1_AAATCTG	4	1422	FALSE	FALSE
17_v.txt	32054	32054-Deletion-G--	Deletion	1	G	-	142	25123	0.565219	62.5282	msh2	FALSE	CAN	JSY22	2	msh2-Rep2	TGT	nope	>1bp-ins	G/C-1	none	G/C-1	TCTGATGTGCGAG	GTGCGAG	ACA	ACA	C	none	C>none	C>none_ACA	G/C-1_GTGCGAG	4	1413	FALSE	FALSE
17_v.txt	32081	32081-Deletion-A--	Deletion	1	A	-	1564	25123	6.22537	62.4962	msh2	FALSE	CAN	JSY22	2	msh2-Rep2	CAA	nope	>1bp-ins	A/T-1	none	A/T-1	CCATGCAAAAAAG	AAAAAAG	GTT	GTT	T	none	T>none	T>none_GTT	A/T-1_AAAAAAG	4	1386	FALSE	FALSE
17_v.txt	32114	32114-Deletion-C--	Deletion	1	C	-	3	25123	0.0119412	59	msh2	FALSE	CAN	JSY22	2	msh2-Rep2	GCC	nope	>1bp-ins	G/C-1	none	G/C-1	TAATAGCCATTCG	CCATTCG	CGG	GCC	C	none	nope	nope_GCC	G/C-1_CCATTCG	4	1353	FALSE	FALSE
17_v.txt	32184	32184-Deletion-A--	Deletion	1	A	-	12	25123	0.047765	46.6667	msh2	FALSE	CAN	JSY22	2	msh2-Rep2	GAA	nope	>1bp-ins	A/T-1	none	A/T-1	GTAACGAAAACTG	AAAACTG	CTT	CTT	T	none	T>none	T>none_CTT	A/T-1_AAAACTG	4	1283	FALSE	FALSE
17_v.txt	32210	32210-Deletion-T--	Deletion	1	T	-	7	25123	0.0278629	44.5714	msh2	FALSE	CAN	JSY22	2	msh2-Rep2	CTT	nope	>1bp-ins	A/T-1	none	A/T-1	ACCACCTTTGGTG	TTTGGTG	GAA	CTT	T	none	nope	nope_CTT	A/T-1_TTTGGTG	4	1257	FALSE	FALSE
17_v.txt	32265	32265-Deletion-A--	Deletion	1	A	-	1603	39775	4.03017	37.063	msh2	FALSE	CAN	JSY22	2	msh2-Rep2	TAA	nope	>1bp-ins	A/T-1	none	A/T-1	CCAAATAAAATAC	AAAATAC	ATT	ATT	T	none	T>none	T>none_ATT	A/T-1_AAAATAC	4	1202	FALSE	FALSE
17_v.txt	32305	32305-Deletion-A--	Deletion	1	A	-	10	39775	0.0251414	58.2	msh2	FALSE	CAN	JSY22	2	msh2-Rep2	GAA	nope	>1bp-ins	A/T-1	none	A/T-1	CGGCAGAAATAAT	AAATAAT	CTT	CTT	T	none	T>none	T>none_CTT	A/T-1_AAATAAT	4	1162	FALSE	FALSE
17_v.txt	32341	32341-Deletion-G--	Deletion	1	G	-	19	39775	0.0477687	61.3158	msh2	FALSE	CAN	JSY22	2	msh2-Rep2	TGT	nope	>1bp-ins	G/C-1	none	G/C-1	AGATATGTGGCAA	GTGGCAA	ACA	ACA	C	none	C>none	C>none_ACA	G/C-1_GTGGCAA	4	1126	FALSE	FALSE
17_v.txt	32346	32346-Deletion-A--	Deletion	1	A	-	538	39775	1.35261	61.6078	msh2	FALSE	CAN	JSY22	2	msh2-Rep2	CAA	nope	>1bp-ins	A/T-1	none	A/T-1	TGTGGCAAAACCT	AAAACCT	GTT	GTT	T	none	T>none	T>none_GTT	A/T-1_AAAACCT	4	1121	FALSE	FALSE
17_v.txt	32416	32416-Deletion-T--	Deletion	1	T	-	9	39775	0.0226273	55.2222	msh2	FALSE	CAN	JSY22	2	msh2-Rep2	GTT	nope	>1bp-ins	A/T-1	none	A/T-1	ATTGTGTTAGTTT	TTAGTTT	CAA	GTT	T	none	nope	nope_GTT	A/T-1_TTAGTTT	4	1051	FALSE	FALSE
17_v.txt	32419	32419-Deletion-G--	Deletion	1	G	-	16	39775	0.0402263	53.9375	msh2	FALSE	CAN	JSY22	2	msh2-Rep2	AGT	nope	>1bp-ins	G/C-1	none	G/C-1	GTGTTAGTTTAGG	GTTTAGG	TCA	TCA	C	none	C>none	C>none_TCA	G/C-1_GTTTAGG	4	1048	FALSE	FALSE
17_v.txt	32442	32442-Deletion-A--	Deletion	1	A	-	36	39775	0.0905091	54.0278	msh2	FALSE	CAN	JSY22	2	msh2-Rep2	TAA	nope	>1bp-ins	A/T-1	none	A/T-1	GGAACTAAAAGTC	AAAAGTC	ATT	ATT	T	none	T>none	T>none_ATT	A/T-1_AAAAGTC	4	1025	FALSE	FALSE
17_v.txt	32490	32490-Deletion-A--	Deletion	1	A	-	1041	39775	2.61722	44.9769	msh2	FALSE	CAN	JSY22	2	msh2-Rep2	GAA	nope	>1bp-ins	A/T-1	none	A/T-1	ATACGGAAAACAA	AAAACAA	CTT	CTT	T	none	T>none	T>none_CTT	A/T-1_AAAACAA	4	977	FALSE	FALSE
17_v.txt	32498	32498-Deletion-T--	Deletion	1	T	-	2757	39775	6.93149	44.7936	msh2	FALSE	CAN	JSY22	2	msh2-Rep2	CTT	nope	>1bp-ins	A/T-1	none	A/T-1	AACAACTTTTTTG	TTTTTTG	GAA	CTT	T	none	nope	nope_CTT	A/T-1_TTTTTTG	4	969	FALSE	FALSE
17_v.txt	32528	32528-Deletion-G--	Deletion	1	G	-	19	39775	0.0477687	41.4211	msh2	FALSE	CAN	JSY22	2	msh2-Rep2	TGG	nope	>1bp-ins	G/C-1	none	G/C-1	TTTTCTGGGGTTT	GGGGTTT	ACC	ACC	C	none	C>none	C>none_ACC	G/C-1_GGGGTTT	4	939	FALSE	FALSE
17_v.txt	32605	32605-Deletion-A--	Deletion	1	A	-	17	32639	0.0520849	38.5294	msh2	FALSE	CAN	JSY22	2	msh2-Rep2	GAA	nope	>1bp-ins	A/T-1	none	A/T-1	AAGAGGAAACCCA	AAACCCA	CTT	CTT	T	none	T>none	T>none_CTT	A/T-1_AAACCCA	4	862	FALSE	FALSE
17_v.txt	32624	32624-Deletion-C--	Deletion	1	C	-	7	32639	0.0214467	41.1429	msh2	FALSE	CAN	JSY22	2	msh2-Rep2	TCC	nope	>1bp-ins	G/C-1	none	G/C-1	GAACCTCCCTTCG	CCCTTCG	AGG	TCC	C	none	nope	nope_TCC	G/C-1_CCCTTCG	4	843	FALSE	FALSE
17_v.txt	32631	32631-Deletion-T--	Deletion	1	T	-	490	32639	1.50127	51.8347	msh2	FALSE	CAN	JSY22	2	msh2-Rep2	GTT	nope	>1bp-ins	A/T-1	none	A/T-1	CCTTCGTTTTTAT	TTTTTAT	CAA	GTT	T	none	nope	nope_GTT	A/T-1_TTTTTAT	4	836	FALSE	FALSE
17_v.txt	32638	32638-Deletion-C--	Deletion	1	C	-	24	32639	0.0735317	54.7083	msh2	FALSE	CAN	JSY22	2	msh2-Rep2	TCC	nope	>1bp-ins	G/C-1	none	G/C-1	TTTTATCCTTAGA	CCTTAGA	AGG	TCC	C	none	nope	nope_TCC	G/C-1_CCTTAGA	4	829	FALSE	FALSE
17_v.txt	32658	32658-Deletion-C--	Deletion	1	C	-	32	32641	0.0980362	57.1562	msh2	FALSE	CAN	JSY22	2	msh2-Rep2	ACC	nope	>1bp-ins	G/C-1	none	G/C-1	CCTGGACCCCAGG	CCCCAGG	TGG	ACC	C	none	nope	nope_ACC	G/C-1_CCCCAGG	4	809	FALSE	FALSE
17_v.txt	32670	32670-Deletion-G--	Deletion	1	G	-	109	32645	0.333895	60.8073	msh2	FALSE	CAN	JSY22	2	msh2-Rep2	TGG	nope	>1bp-ins	G/C-1	none	G/C-1	GCACCTGGGTTTC	GGGTTTC	ACC	ACC	C	none	C>none	C>none_ACC	G/C-1_GGGTTTC	4	797	FALSE	FALSE
17_v.txt	32707	32707-Deletion-C--	Deletion	1	C	-	516	32645	1.58064	61.7636	msh2	FALSE	CAN	JSY22	2	msh2-Rep2	ACC	nope	>1bp-ins	G/C-1	none	G/C-1	CGGTAACCCCAGC	CCCCAGC	TGG	ACC	C	none	nope	nope_ACC	G/C-1_CCCCAGC	4	760	FALSE	FALSE
17_v.txt	32728	32728-Deletion-A--	Deletion	1	A	-	1169	32644	3.58106	60.2335	msh2	FALSE	CAN	JSY22	2	msh2-Rep2	CAA	nope	>1bp-ins	A/T-1	none	A/T-1	CCATACAAAAACA	AAAAACA	GTT	GTT	T	none	T>none	T>none_GTT	A/T-1_AAAAACA	4	739	FALSE	FALSE
17_v.txt	32760	32760-Deletion-A--	Deletion	1	A	-	120	32645	0.367591	51.5417	msh2	FALSE	CAN	JSY22	2	msh2-Rep2	TAA	nope	>1bp-ins	A/T-1	none	A/T-1	ATGGCTAAAACTT	AAAACTT	ATT	ATT	T	none	T>none	T>none_ATT	A/T-1_AAAACTT	4	707	FALSE	FALSE
17_v.txt	32765	32765-Deletion-T--	Deletion	1	T	-	4	32645	0.012253	57.25	msh2	FALSE	CAN	JSY22	2	msh2-Rep2	CTT	nope	>1bp-ins	A/T-1	none	A/T-1	TAAAACTTTGATG	TTTGATG	GAA	CTT	T	none	nope	nope_CTT	A/T-1_TTTGATG	4	702	FALSE	FALSE
17_v.txt	32779	32779-Deletion-C--	Deletion	1	C	-	21	32645	0.0643284	48.5238	msh2	FALSE	CAN	JSY22	2	msh2-Rep2	ACC	nope	>1bp-ins	G/C-1	none	G/C-1	AAGCGACCCAGAA	CCCAGAA	TGG	ACC	C	none	nope	nope_ACC	G/C-1_CCCAGAA	4	688	FALSE	FALSE
17_v.txt	32842	32842-Deletion-A--	Deletion	1	A	-	2961	32645	9.0703	42.1327	msh2	FALSE	CAN	JSY22	2	msh2-Rep2	CAA	nope	>1bp-ins	A/T-1	none	A/T-1	TTACCCAAAAAAT	AAAAAAT	GTT	GTT	T	none	T>none	T>none_GTT	A/T-1_AAAAAAT	4	625	FALSE	FALSE
17_v.txt	32879	32879-Deletion-C--	Deletion	1	C	-	39	34626	0.112632	36.641	msh2	FALSE	CAN	JSY22	2	msh2-Rep2	ACG	nope	>1bp-ins	G/C-1	none	G/C-1	TTTGTACGTCCAA	CGTCCAA	TGC	ACG	C	none	nope	nope_ACG	G/C-1_CGTCCAA	4	588	FALSE	FALSE
17_v.txt	32884	32884-Deletion-A--	Deletion	1	A	-	16	34628	0.0462054	35.8125	msh2	FALSE	CAN	JSY22	2	msh2-Rep2	CAA	nope	>1bp-ins	A/T-1	none	A/T-1	ACGTCCAAAATTG	AAAATTG	GTT	GTT	T	none	T>none	T>none_GTT	A/T-1_AAAATTG	4	583	FALSE	FALSE
17_v.txt	32917	32917-Deletion-C--	Deletion	1	C	-	3	34628	0.008664	55.3333	msh2	FALSE	CAN	JSY22	2	msh2-Rep2	TCC	nope	>1bp-ins	G/C-1	none	G/C-1	TAAGTTCCAGGGC	CCAGGGC	AGG	TCC	C	none	nope	nope_TCC	G/C-1_CCAGGGC	4	550	FALSE	FALSE
17_v.txt	32924	32924-Deletion-A--	Deletion	1	A	-	1186	34628	3.42497	55.6113	msh2	FALSE	CAN	JSY22	2	msh2-Rep2	CAA	nope	>1bp-ins	A/T-1	none	A/T-1	CAGGGCAAAAGTG	AAAAGTG	GTT	GTT	T	none	T>none	T>none_GTT	A/T-1_AAAAGTG	4	543	FALSE	FALSE
17_v.txt	32941	32941-Deletion-A--	Deletion	1	A	-	48	34627	0.13862	61.0208	msh2	FALSE	CAN	JSY22	2	msh2-Rep2	GAA	nope	>1bp-ins	A/T-1	none	A/T-1	CCCAAGAAAACCA	AAAACCA	CTT	CTT	T	none	T>none	T>none_CTT	A/T-1_AAAACCA	4	526	FALSE	FALSE
17_v.txt	32972	32972-Deletion-A--	Deletion	1	A	-	8	34628	0.0231027	64	msh2	FALSE	CAN	JSY22	2	msh2-Rep2	CAA	nope	>1bp-ins	A/T-1	none	A/T-1	CGCACCAAATGCT	AAATGCT	GTT	GTT	T	none	T>none	T>none_GTT	A/T-1_AAATGCT	4	495	FALSE	FALSE
17_v.txt	32992	32992-Deletion-T--	Deletion	1	T	-	13	34628	0.0375419	57.6923	msh2	FALSE	CAN	JSY22	2	msh2-Rep2	CTT	nope	>1bp-ins	A/T-1	none	A/T-1	GGAATCTTTGTGA	TTTGTGA	GAA	CTT	T	none	nope	nope_CTT	A/T-1_TTTGTGA	4	475	FALSE	FALSE
17_v.txt	32995	32995-Deletion-G--	Deletion	1	G	-	60	34628	0.17327	59.9833	msh2	FALSE	CAN	JSY22	2	msh2-Rep2	TGT	nope	>1bp-ins	G/C-1	none	G/C-1	ATCTTTGTGAGAA	GTGAGAA	ACA	ACA	C	none	C>none	C>none_ACA	G/C-1_GTGAGAA	4	472	FALSE	FALSE
17_v.txt	32999	32999-Deletion-G--	Deletion	1	G	-	29	34627	0.0837497	61.8621	msh2	FALSE	CAN	JSY22	2	msh2-Rep2	AGA	nope	>1bp-ins	G/C-1	none	G/C-1	TTGTGAGAAAACT	GAAAACT	TCT	TCT	C	none	C>none	C>none_TCT	G/C-1_GAAAACT	4	468	FALSE	FALSE
17_v.txt	33000	33000-Deletion-A--	Deletion	1	A	-	211	34627	0.609351	62.1754	msh2	FALSE	CAN	JSY22	2	msh2-Rep2	GAA	nope	>1bp-ins	A/T-1	none	A/T-1	TGTGAGAAAACTG	AAAACTG	CTT	CTT	T	none	T>none	T>none_CTT	A/T-1_AAAACTG	4	467	FALSE	FALSE
17_v.txt	33033	33033-Deletion-G--	Deletion	1	G	-	33	34628	0.0952986	60.4848	msh2	FALSE	CAN	JSY22	2	msh2-Rep2	TGT	nope	>1bp-ins	G/C-1	none	G/C-1	ATGAATGTAGCCA	GTAGCCA	ACA	ACA	C	none	C>none	C>none_ACA	G/C-1_GTAGCCA	4	434	FALSE	FALSE
17_v.txt	33083	33083-Deletion-A--	Deletion	1	A	-	19	34628	0.0548689	45.8947	msh2	FALSE	CAN	JSY22	2	msh2-Rep2	TAA	nope	>1bp-ins	A/T-1	none	A/T-1	ACCCATAAATAAA	AAATAAA	ATT	ATT	T	none	T>none	T>none_ATT	A/T-1_AAATAAA	4	384	FALSE	FALSE
17_v.txt	33111	33111-Deletion-G--	Deletion	1	G	-	3	34628	0.008664	46	msh2	FALSE	CAN	JSY22	2	msh2-Rep2	TGG	nope	>1bp-ins	G/C-1	none	G/C-1	CCCACTGGGCCGG	GGGCCGG	ACC	ACC	C	none	C>none	C>none_ACC	G/C-1_GGGCCGG	4	356	FALSE	FALSE
17_v.txt	33138	33138-Deletion-A--	Deletion	1	A	-	31	34628	0.0895229	37.5484	msh2	FALSE	CAN	JSY22	2	msh2-Rep2	TAA	nope	>1bp-ins	A/T-1	none	A/T-1	GTGGATAAACCAA	AAACCAA	ATT	ATT	T	none	T>none	T>none_ATT	A/T-1_AAACCAA	4	329	FALSE	FALSE
17_v.txt	33147	33147-Deletion-A--	Deletion	1	A	-	14	34628	0.0404297	43.4286	msh2	FALSE	CAN	JSY22	2	msh2-Rep2	GAA	nope	>1bp-ins	A/T-1	none	A/T-1	CCAATGAAAAGAC	AAAAGAC	CTT	CTT	T	none	T>none	T>none_CTT	A/T-1_AAAAGAC	4	320	FALSE	FALSE
17_v.txt	33168	33168-Deletion-C--	Deletion	1	C	-	2	34625	0.005776	38	msh2	FALSE	CAN	JSY22	2	msh2-Rep2	ACC	nope	>1bp-ins	G/C-1	none	G/C-1	ATAGTACCACCAA	CCACCAA	TGG	ACC	C	none	nope	nope_ACC	G/C-1_CCACCAA	4	299	FALSE	FALSE
17_v.txt	33236	33236-Deletion-T--	Deletion	1	T	-	57	24068	0.236829	38.386	msh2	FALSE	CAN	JSY22	2	msh2-Rep2	CTC	nope	>1bp-ins	A/T-1	none	A/T-1	TACTTCTCCTTCA	TCCTTCA	GAG	CTC	T	none	nope	nope_CTC	A/T-1_TCCTTCA	4	231	FALSE	FALSE
17_v.txt	33258	33258-Deletion-C--	Deletion	1	C	-	2	24068	0.00831	38	msh2	FALSE	CAN	JSY22	2	msh2-Rep2	GCC	nope	>1bp-ins	G/C-1	none	G/C-1	CCTATGCCATCCT	CCATCCT	CGG	GCC	C	none	nope	nope_GCC	G/C-1_CCATCCT	4	209	FALSE	FALSE
17_v.txt	33276	33276-Deletion-G--	Deletion	1	G	-	16	24068	0.0664783	53	msh2	FALSE	CAN	JSY22	2	msh2-Rep2	CGT	nope	>1bp-ins	G/C-1	none	G/C-1	GAGAACGTATCCT	GTATCCT	GCA	GCA	C	none	C>none	C>none_GCA	G/C-1_GTATCCT	4	191	FALSE	FALSE
17_v.txt	33331	33331-Deletion-T--	Deletion	1	T	-	26	24068	0.108027	62.6154	msh2	FALSE	CAN	JSY22	2	msh2-Rep2	CTT	nope	>1bp-ins	A/T-1	none	A/T-1	CTTTACTTTTCTC	TTTTCTC	GAA	CTT	T	none	nope	nope_CTT	A/T-1_TTTTCTC	4	136	FALSE	FALSE
17_v.txt	33452	33452-Deletion-T--	Deletion	1	T	-	24	24068	0.0997175	40.0417	msh2	FALSE	CAN	JSY22	2	msh2-Rep2	CTT	nope	>1bp-ins	A/T-1	none	A/T-1	GTCTTCTTTTGAA	TTTTGAA	GAA	CTT	T	none	nope	nope_CTT	A/T-1_TTTTGAA	4	15	FALSE	FALSE
17_v.txt	33474	33474-Deletion-C--	Deletion	1	C	-	55	24066	0.228538	30.5818	msh2	FALSE	CAN	JSY22	2	msh2-Rep2	GCC	nope	>1bp-ins	G/C-1	none	G/C-1	GCTATGCCTTTTT	CCTTTTT	CGG	GCC	C	none	nope	nope_GCC	G/C-1_CCTTTTT	4	N_A	FALSE	FALSE
18_v.txt	31723	31723-SNV-A-C	SNV	1	A	C	2	7587	0.0263609	33	msh2	FALSE	CAN	JSY22	3	msh2-Rep3	CAA	A>C	G/C+1	A/T-1	TA>GC	TA>GC	TGTCCCAAAAAGT	AAAAAGT	GTT	GTT	T	G	T>G	T>G_GTT	TA>GC_AAAAAGT	4	1744	FALSE	FALSE
18_v.txt	32160	32160-SNV-A-C	SNV	1	A	C	1	21859	0.004575	38.0014	msh2	FALSE	CAN	JSY22	3	msh2-Rep3	CAA	A>C	G/C+1	A/T-1	TA>GC	TA>GC	TAAGCCAAAGCGC	AAAGCGC	GTT	GTT	T	G	T>G	T>G_GTT	TA>GC_AAAGCGC	4	1307	FALSE	FALSE
18_v.txt	32680	32680-SNV-A-C	SNV	1	A	C	1	28548	0.003503	57	msh2	FALSE	CAN	JSY22	3	msh2-Rep3	CAA	A>C	G/C+1	A/T-1	TA>GC	TA>GC	TTCTCCAATAACG	AATAACG	GTT	GTT	T	G	T>G	T>G_GTT	TA>GC_AATAACG	4	787	FALSE	FALSE
18_v.txt	32681	32681-SNV-A-C	SNV	1	A	C	24	28548	0.0840689	49.9168	msh2	FALSE	CAN	JSY22	3	msh2-Rep3	AAT	A>C	G/C+1	A/T-1	TA>GC	TA>GC	TCTCCAATAACGG	ATAACGG	TTA	TTA	T	G	T>G	T>G_TTA	TA>GC_ATAACGG	4	786	FALSE	FALSE
18_v.txt	32728	32728-SNV-A-C	SNV	1	A	C	5	28547	0.017515	25.8001	msh2	FALSE	CAN	JSY22	3	msh2-Rep3	CAA	A>C	G/C+1	A/T-1	TA>GC	TA>GC	CCATACAAAAACA	AAAAACA	GTT	GTT	T	G	T>G	T>G_GTT	TA>GC_AAAAACA	4	739	FALSE	FALSE
18_v.txt	32801	32801-SNV-A-C	SNV	1	A	C	52	28548	0.182149	44.8269	msh2	FALSE	CAN	JSY22	3	msh2-Rep3	AAT	A>C	G/C+1	A/T-1	TA>GC	TA>GC	ACCGTAATATTTG	ATATTTG	TTA	TTA	T	G	T>G	T>G_TTA	TA>GC_ATATTTG	4	666	FALSE	FALSE
18_v.txt	32842	32842-SNV-A-C	SNV	1	A	C	5	28548	0.0175144	34.6002	msh2	FALSE	CAN	JSY22	3	msh2-Rep3	CAA	A>C	G/C+1	A/T-1	TA>GC	TA>GC	TTACCCAAAAAAT	AAAAAAT	GTT	GTT	T	G	T>G	T>G_GTT	TA>GC_AAAAAAT	4	625	FALSE	FALSE
18_v.txt	32985	32985-SNV-A-C	SNV	1	A	C	29	21619	0.134141	61.1034	msh2	FALSE	CAN	JSY22	3	msh2-Rep3	AAG	A>C	G/C+1	A/T-1	TA>GC	TA>GC	GGAGAAAGGAATC	AGGAATC	TTC	TTC	T	G	T>G	T>G_TTC	TA>GC_AGGAATC	4	482	FALSE	FALSE
18_v.txt	33095	33095-SNV-T-G	SNV	1	T	G	4	21619	0.0185022	27.4994	msh2	FALSE	CAN	JSY22	3	msh2-Rep3	ATA	T>G	G/C+1	A/T-1	TA>GC	TA>GC	ATATGATATAAGA	TATAAGA	TAT	ATA	T	C	T>G	T>G_ATA	TA>GC_TATAAGA	4	372	FALSE	FALSE
18_v.txt	33099	33099-SNV-A-C	SNV	1	A	C	85	21619	0.393173	46.6706	msh2	FALSE	CAN	JSY22	3	msh2-Rep3	AAG	A>C	G/C+1	A/T-1	TA>GC	TA>GC	GATATAAGAGCGC	AGAGCGC	TTC	TTC	T	G	T>G	T>G_TTC	TA>GC_AGAGCGC	4	368	FALSE	FALSE
18_v.txt	33204	33204-SNV-A-C	SNV	1	A	C	1124	26711	4.208	37.2954	msh2	FALSE	CAN	JSY22	3	msh2-Rep3	AAG	A>C	G/C+1	A/T-1	TA>GC	TA>GC	TGCTTAAGCTCTC	AGCTCTC	TTC	TTC	T	G	T>G	T>G_TTC	TA>GC_AGCTCTC	4	263	FALSE	FALSE
18_v.txt	33207	33207-SNV-T-G	SNV	1	T	G	4	26711	0.0149751	13.7497	msh2	FALSE	CAN	JSY22	3	msh2-Rep3	CTC	T>G	G/C+1	A/T-1	TA>GC	TA>GC	TTAAGCTCTCTCT	TCTCTCT	GAG	CTC	T	C	T>G	T>G_CTC	TA>GC_TCTCTCT	4	260	FALSE	FALSE
18_v.txt	31723	31723-SNV-A-G	SNV	1	A	G	4	7587	0.0527218	40.75	msh2	FALSE	CAN	JSY22	3	msh2-Rep3	CAA	A>G	G/C+1	A/T-1	TA>CG	TA>CG	TGTCCCAAAAAGT	AAAAAGT	GTT	GTT	T	C	T>C	T>C_GTT	TA>CG_AAAAAGT	4	1744	FALSE	FALSE
18_v.txt	32256	32256-SNV-A-G	SNV	1	A	G	242	32201	0.751529	36.5744	msh2	FALSE	CAN	JSY22	3	msh2-Rep3	TAG	A>G	G/C+1	A/T-1	TA>CG	TA>CG	TTTGATAGACCAA	AGACCAA	ATC	ATC	T	C	T>C	T>C_ATC	TA>CG_AGACCAA	4	1211	FALSE	FALSE
18_v.txt	32275	32275-SNV-A-G	SNV	1	A	G	135	32217	0.419033	35.9268	msh2	FALSE	CAN	JSY22	3	msh2-Rep3	GAA	A>G	G/C+1	A/T-1	TA>CG	TA>CG	TACGGGAACCAAC	AACCAAC	CTT	CTT	T	C	T>C	T>C_CTT	TA>CG_AACCAAC	4	1192	FALSE	FALSE
18_v.txt	32293	32293-SNV-A-G	SNV	1	A	G	95	32217	0.294875	50.5895	msh2	FALSE	CAN	JSY22	3	msh2-Rep3	GAA	A>G	G/C+1	A/T-1	TA>CG	TA>CG	TATTTGAATTTGC	AATTTGC	CTT	CTT	T	C	T>C	T>C_CTT	TA>CG_AATTTGC	4	1174	FALSE	FALSE
18_v.txt	32445	32445-SNV-A-G	SNV	1	A	G	127	32217	0.394202	50.4252	msh2	FALSE	CAN	JSY22	3	msh2-Rep3	AAG	A>G	G/C+1	A/T-1	TA>CG	TA>CG	ACTAAAAGTCCAA	AGTCCAA	TTC	TTC	T	C	T>C	T>C_TTC	TA>CG_AGTCCAA	4	1022	FALSE	FALSE
18_v.txt	32490	32490-SNV-A-G	SNV	1	A	G	53	32217	0.164509	45.3774	msh2	FALSE	CAN	JSY22	3	msh2-Rep3	GAA	A>G	G/C+1	A/T-1	TA>CG	TA>CG	ATACGGAAAACAA	AAAACAA	CTT	CTT	T	C	T>C	T>C_CTT	TA>CG_AAAACAA	4	977	FALSE	FALSE
18_v.txt	32583	32583-SNV-A-G	SNV	1	A	G	25	28548	0.0875718	35.44	msh2	FALSE	CAN	JSY22	3	msh2-Rep3	GAA	A>G	G/C+1	A/T-1	TA>CG	TA>CG	AATGTGAAGGCAG	AAGGCAG	CTT	CTT	T	C	T>C	T>C_CTT	TA>CG_AAGGCAG	4	884	FALSE	FALSE
18_v.txt	32680	32680-SNV-A-G	SNV	1	A	G	97	28548	0.339779	61.6495	msh2	FALSE	CAN	JSY22	3	msh2-Rep3	CAA	A>G	G/C+1	A/T-1	TA>CG	TA>CG	TTCTCCAATAACG	AATAACG	GTT	GTT	T	C	T>C	T>C_GTT	TA>CG_AATAACG	4	787	FALSE	FALSE
18_v.txt	32983	32983-SNV-A-G	SNV	1	A	G	76	21619	0.351543	59.7105	msh2	FALSE	CAN	JSY22	3	msh2-Rep3	GAA	A>G	G/C+1	A/T-1	TA>CG	TA>CG	CTGGAGAAAGGAA	AAAGGAA	CTT	CTT	T	C	T>C	T>C_CTT	TA>CG_AAAGGAA	4	484	FALSE	FALSE
18_v.txt	33094	33094-SNV-A-G	SNV	1	A	G	7	21619	0.0323789	50.0002	msh2	FALSE	CAN	JSY22	3	msh2-Rep3	GAT	A>G	G/C+1	A/T-1	TA>CG	TA>CG	AATATGATATAAG	ATATAAG	CTA	CTA	T	C	T>C	T>C_CTA	TA>CG_ATATAAG	4	373	FALSE	FALSE
18_v.txt	33095	33095-SNV-T-C	SNV	1	T	C	4	21619	0.0185022	35.997	msh2	FALSE	CAN	JSY22	3	msh2-Rep3	ATA	T>C	G/C+1	A/T-1	TA>CG	TA>CG	ATATGATATAAGA	TATAAGA	TAT	ATA	T	G	T>C	T>C_ATA	TA>CG_TATAAGA	4	372	FALSE	FALSE
18_v.txt	33099	33099-SNV-A-G	SNV	1	A	G	16	21619	0.074009	44.0625	msh2	FALSE	CAN	JSY22	3	msh2-Rep3	AAG	A>G	G/C+1	A/T-1	TA>CG	TA>CG	GATATAAGAGCGC	AGAGCGC	TTC	TTC	T	C	T>C	T>C_TTC	TA>CG_AGAGCGC	4	368	FALSE	FALSE
18_v.txt	33204	33204-SNV-A-G	SNV	1	A	G	50	26711	0.187189	37.2	msh2	FALSE	CAN	JSY22	3	msh2-Rep3	AAG	A>G	G/C+1	A/T-1	TA>CG	TA>CG	TGCTTAAGCTCTC	AGCTCTC	TTC	TTC	T	C	T>C	T>C_TTC	TA>CG_AGCTCTC	4	263	FALSE	FALSE
18_v.txt	33207	33207-SNV-T-C	SNV	1	T	C	11	26711	0.0411815	18.1801	msh2	FALSE	CAN	JSY22	3	msh2-Rep3	CTC	T>C	G/C+1	A/T-1	TA>CG	TA>CG	TTAAGCTCTCTCT	TCTCTCT	GAG	CTC	T	G	T>C	T>C_CTC	TA>CG_TCTCTCT	4	260	FALSE	FALSE
18_v.txt	33476	33476-SNV-T-C	SNV	1	T	C	50	26710	0.187196	33.3	msh2	FALSE	CAN	JSY22	3	msh2-Rep3	CTT	T>C	G/C+1	A/T-1	TA>CG	TA>CG	TATGCCTTTTTTT	TTTTTTT	GAA	CTT	T	G	T>C	T>C_CTT	TA>CG_TTTTTTT	4	N_A	FALSE	FALSE
18_v.txt	32498	32498-SNV-T-A	SNV	1	T	A	9	32217	0.0279356	40.7722	msh2	FALSE	CAN	JSY22	3	msh2-Rep3	CTT	T>A	A/T+1	A/T-1	TA>AT	TA>AT	AACAACTTTTTTG	TTTTTTG	GAA	CTT	T	T	T>A	T>A_CTT	TA>AT_TTTTTTG	4	969	FALSE	FALSE
18_v.txt	32680	32680-SNV-A-T	SNV	1	A	T	5	28548	0.0175144	64	msh2	FALSE	CAN	JSY22	3	msh2-Rep3	CAA	A>T	A/T+1	A/T-1	TA>AT	TA>AT	TTCTCCAATAACG	AATAACG	GTT	GTT	T	A	T>A	T>A_GTT	TA>AT_AATAACG	4	787	FALSE	FALSE
18_v.txt	32938	32938-SNV-A-T	SNV	1	A	T	3	21619	0.0138767	50.9989	msh2	FALSE	CAN	JSY22	3	msh2-Rep3	CAA	A>T	A/T+1	A/T-1	TA>AT	TA>AT	TTGCCCAAGAAAA	AAGAAAA	GTT	GTT	T	A	T>A	T>A_GTT	TA>AT_AAGAAAA	4	529	FALSE	FALSE
18_v.txt	32941	32941-SNV-A-T	SNV	1	A	T	4	21619	0.0185022	24.2495	msh2	FALSE	CAN	JSY22	3	msh2-Rep3	GAA	A>T	A/T+1	A/T-1	TA>AT	TA>AT	CCCAAGAAAACCA	AAAACCA	CTT	CTT	T	A	T>A	T>A_CTT	TA>AT_AAAACCA	4	526	FALSE	FALSE
18_v.txt	33190	33190-SNV-T-A	SNV	1	T	A	5	26712	0.0187182	35.799	msh2	FALSE	CAN	JSY22	3	msh2-Rep3	ATA	T>A	A/T+1	A/T-1	TA>AT	TA>AT	TACCAATATGTCT	TATGTCT	TAT	ATA	T	T	T>A	T>A_ATA	TA>AT_TATGTCT	4	277	FALSE	FALSE
18_v.txt	31930	31930-SNV-G-A	SNV	1	G	A	46	7586	0.60638	36.1304	msh2	FALSE	CAN	JSY22	3	msh2-Rep3	TGA	G>A	A/T+1	G/C-1	CG>TA	CG>TA	AACCTTGAATAAT	GAATAAT	ACT	ACT	C	T	C>T	C>T_ACT	CG>TA_GAATAAT	4	1537	FALSE	FALSE
18_v.txt	31960	31960-SNV-C-T	SNV	1	C	T	24	21860	0.10979	35.1667	msh2	FALSE	CAN	JSY22	3	msh2-Rep3	GCC	C>T	A/T+1	G/C-1	CG>TA	CG>TA	ATGTGGCCGCATA	CCGCATA	CGG	GCC	C	A	C>T	C>T_GCC	CG>TA_CCGCATA	4	1507	FALSE	FALSE
18_v.txt	31962	31962-SNV-G-A	SNV	1	G	A	33	21860	0.150961	36.5455	msh2	FALSE	CAN	JSY22	3	msh2-Rep3	CGC	G>A	A/T+1	G/C-1	CG>TA	CG>TA	GTGGCCGCATAAT	GCATAAT	GCG	GCG	C	T	C>T	C>T_GCG	CG>TA_GCATAAT	4	1505	FALSE	FALSE
18_v.txt	31972	31972-SNV-C-T	SNV	1	C	T	17	21860	0.0777676	35.0588	msh2	FALSE	CAN	JSY22	3	msh2-Rep3	GCC	C>T	A/T+1	G/C-1	CG>TA	CG>TA	AATAAGCCAAGCC	CCAAGCC	CGG	GCC	C	A	C>T	C>T_GCC	CG>TA_CCAAGCC	4	1495	FALSE	FALSE
18_v.txt	32041	32041-SNV-G-A	SNV	1	G	A	68	21860	0.31107	61.2059	msh2	FALSE	CAN	JSY22	3	msh2-Rep3	TGC	G>A	A/T+1	G/C-1	CG>TA	CG>TA	AAGCTTGCATAAA	GCATAAA	ACG	ACG	C	T	C>T	C>T_ACG	CG>TA_GCATAAA	4	1426	FALSE	FALSE
18_v.txt	32075	32075-SNV-C-T	SNV	1	C	T	164	21860	0.750229	62.2378	msh2	FALSE	CAN	JSY22	3	msh2-Rep3	ACC	C>T	A/T+1	G/C-1	CG>TA	CG>TA	AAATAACCATGCA	CCATGCA	TGG	ACC	C	A	C>T	C>T_ACC	CG>TA_CCATGCA	4	1392	FALSE	FALSE
18_v.txt	32088	32088-SNV-C-T	SNV	1	C	T	117	21860	0.535224	60.0345	msh2	FALSE	CAN	JSY22	3	msh2-Rep3	GCC	C>T	A/T+1	G/C-1	CG>TA	CG>TA	AAAAAGCCTGCAA	CCTGCAA	CGG	GCC	C	A	C>T	C>T_GCC	CG>TA_CCTGCAA	4	1379	FALSE	FALSE
18_v.txt	32092	32092-SNV-C-T	SNV	1	C	T	24	21860	0.10979	61.7917	msh2	FALSE	CAN	JSY22	3	msh2-Rep3	GCA	C>T	A/T+1	G/C-1	CG>TA	CG>TA	AGCCTGCAACACC	CAACACC	CGT	GCA	C	A	C>T	C>T_GCA	CG>TA_CAACACC	4	1375	FALSE	FALSE
18_v.txt	32114	32114-SNV-C-T	SNV	1	C	T	105	21860	0.480329	58.7905	msh2	FALSE	CAN	JSY22	3	msh2-Rep3	GCC	C>T	A/T+1	G/C-1	CG>TA	CG>TA	TAATAGCCATTCG	CCATTCG	CGG	GCC	C	A	C>T	C>T_GCC	CG>TA_CCATTCG	4	1353	FALSE	FALSE
18_v.txt	32165	32165-SNV-G-A	SNV	1	G	A	41	21860	0.187557	43.7093	msh2	FALSE	CAN	JSY22	3	msh2-Rep3	CGC	G>A	A/T+1	G/C-1	CG>TA	CG>TA	CAAAGCGCCAAAT	GCCAAAT	GCG	GCG	C	T	C>T	C>T_GCG	CG>TA_GCCAAAT	4	1302	FALSE	FALSE
18_v.txt	32166	32166-SNV-C-T	SNV	1	C	T	112	21860	0.512351	46.1574	msh2	FALSE	CAN	JSY22	3	msh2-Rep3	GCC	C>T	A/T+1	G/C-1	CG>TA	CG>TA	AAAGCGCCAAATG	CCAAATG	CGG	GCC	C	A	C>T	C>T_GCC	CG>TA_CCAAATG	4	1301	FALSE	FALSE
18_v.txt	32173	32173-SNV-C-T	SNV	1	C	T	20	21860	0.0914913	44.75	msh2	FALSE	CAN	JSY22	3	msh2-Rep3	GCA	C>T	A/T+1	G/C-1	CG>TA	CG>TA	CAAATGCAGCAGT	CAGCAGT	CGT	GCA	C	A	C>T	C>T_GCA	CG>TA_CAGCAGT	4	1294	FALSE	FALSE
18_v.txt	32200	32200-SNV-G-A	SNV	1	G	A	59	21860	0.269899	42.9322	msh2	FALSE	CAN	JSY22	3	msh2-Rep3	GGA	G>A	A/T+1	G/C-1	CG>TA	CG>TA	TGTATGGAACACC	GAACACC	CCT	CCT	C	T	C>T	C>T_CCT	CG>TA_GAACACC	4	1267	FALSE	FALSE
18_v.txt	32205	32205-SNV-C-T	SNV	1	C	T	18	21860	0.0823422	43.7222	msh2	FALSE	CAN	JSY22	3	msh2-Rep3	ACC	C>T	A/T+1	G/C-1	CG>TA	CG>TA	GGAACACCACCTT	CCACCTT	TGG	ACC	C	A	C>T	C>T_ACC	CG>TA_CCACCTT	4	1262	FALSE	FALSE
18_v.txt	32271	32271-SNV-C-T	SNV	1	C	T	39	32217	0.121054	30.9226	msh2	FALSE	CAN	JSY22	3	msh2-Rep3	ACG	C>T	A/T+1	G/C-1	CG>TA	CG>TA	AAAATACGGGAAC	CGGGAAC	TGC	ACG	C	A	C>T	C>T_ACG	CG>TA_CGGGAAC	4	1196	FALSE	FALSE
18_v.txt	32274	32274-SNV-G-A	SNV	1	G	A	31	32217	0.0962225	37.2258	msh2	FALSE	CAN	JSY22	3	msh2-Rep3	GGA	G>A	A/T+1	G/C-1	CG>TA	CG>TA	ATACGGGAACCAA	GAACCAA	CCT	CCT	C	T	C>T	C>T_CCT	CG>TA_GAACCAA	4	1193	FALSE	FALSE
18_v.txt	32299	32299-SNV-C-T	SNV	1	C	T	53	32217	0.164509	51.6981	msh2	FALSE	CAN	JSY22	3	msh2-Rep3	GCG	C>T	A/T+1	G/C-1	CG>TA	CG>TA	AATTTGCGGCAGA	CGGCAGA	CGC	GCG	C	A	C>T	C>T_GCG	CG>TA_CGGCAGA	4	1168	FALSE	FALSE
18_v.txt	32413	32413-SNV-G-A	SNV	1	G	A	40	32217	0.124158	54.925	msh2	FALSE	CAN	JSY22	3	msh2-Rep3	TGT	G>A	A/T+1	G/C-1	CG>TA	CG>TA	TAGATTGTGTTAG	GTGTTAG	ACA	ACA	C	T	C>T	C>T_ACA	CG>TA_GTGTTAG	4	1054	FALSE	FALSE
18_v.txt	32449	32449-SNV-C-T	SNV	1	C	T	114	32216	0.353861	50.4825	msh2	FALSE	CAN	JSY22	3	msh2-Rep3	CCA	C>T	A/T+1	G/C-1	CG>TA	CG>TA	AAAGTCCAATGAA	CAATGAA	GGT	CCA	C	A	C>T	C>T_CCA	CG>TA_CAATGAA	4	1018	FALSE	FALSE
18_v.txt	32466	32466-SNV-C-T	SNV	1	C	T	29	32217	0.0900146	47.6207	msh2	FALSE	CAN	JSY22	3	msh2-Rep3	GCC	C>T	A/T+1	G/C-1	CG>TA	CG>TA	AGAGAGCCAATGT	CCAATGT	CGG	GCC	C	A	C>T	C>T_GCC	CG>TA_CCAATGT	4	1001	FALSE	FALSE
18_v.txt	32487	32487-SNV-C-T	SNV	1	C	T	265	32217	0.822547	45.1311	msh2	FALSE	CAN	JSY22	3	msh2-Rep3	ACG	C>T	A/T+1	G/C-1	CG>TA	CG>TA	AAGATACGGAAAA	CGGAAAA	TGC	ACG	C	A	C>T	C>T_ACG	CG>TA_CGGAAAA	4	980	FALSE	FALSE
18_v.txt	32488	32488-SNV-G-A	SNV	1	G	A	59	32217	0.183133	45.7448	msh2	FALSE	CAN	JSY22	3	msh2-Rep3	CGG	G>A	A/T+1	G/C-1	CG>TA	CG>TA	AGATACGGAAAAC	GGAAAAC	GCC	GCC	C	T	C>T	C>T_GCC	CG>TA_GGAAAAC	4	979	FALSE	FALSE
18_v.txt	32535	32535-SNV-G-A	SNV	1	G	A	29	32217	0.0900146	35.0645	msh2	FALSE	CAN	JSY22	3	msh2-Rep3	TGC	G>A	A/T+1	G/C-1	CG>TA	CG>TA	GGGTTTGCAGCTT	GCAGCTT	ACG	ACG	C	T	C>T	C>T_ACG	CG>TA_GCAGCTT	4	932	FALSE	FALSE
18_v.txt	32536	32536-SNV-C-T	SNV	1	C	T	38	32217	0.11795	36.0526	msh2	FALSE	CAN	JSY22	3	msh2-Rep3	GCA	C>T	A/T+1	G/C-1	CG>TA	CG>TA	GGTTTGCAGCTTC	CAGCTTC	CGT	GCA	C	A	C>T	C>T_GCA	CG>TA_CAGCTTC	4	931	FALSE	FALSE
18_v.txt	32566	32566-SNV-C-T	SNV	1	C	T	88	28532	0.308426	36.2727	msh2	FALSE	CAN	JSY22	3	msh2-Rep3	TCA	C>T	A/T+1	G/C-1	CG>TA	CG>TA	CTAGTTCAGTACC	CAGTACC	AGT	TCA	C	A	C>T	C>T_TCA	CG>TA_CAGTACC	4	901	FALSE	FALSE
18_v.txt	32568	32568-SNV-G-A	SNV	1	G	A	34	28544	0.119114	36.7353	msh2	FALSE	CAN	JSY22	3	msh2-Rep3	AGT	G>A	A/T+1	G/C-1	CG>TA	CG>TA	AGTTCAGTACCTT	GTACCTT	TCA	TCA	C	T	C>T	C>T_TCA	CG>TA_GTACCTT	4	899	FALSE	FALSE
18_v.txt	32590	32590-SNV-C-T	SNV	1	C	T	36	28548	0.126103	35.7778	msh2	FALSE	CAN	JSY22	3	msh2-Rep3	GCG	C>T	A/T+1	G/C-1	CG>TA	CG>TA	AGGCAGCGTTAAT	CGTTAAT	CGC	GCG	C	A	C>T	C>T_GCG	CG>TA_CGTTAAT	4	877	FALSE	FALSE
18_v.txt	32610	32610-SNV-C-T	SNV	1	C	T	33	28548	0.115595	49.4848	msh2	FALSE	CAN	JSY22	3	msh2-Rep3	CCA	C>T	A/T+1	G/C-1	CG>TA	CG>TA	GAAACCCAACCTA	CAACCTA	GGT	CCA	C	A	C>T	C>T_CCA	CG>TA_CAACCTA	4	857	FALSE	FALSE
18_v.txt	32661	32661-SNV-C-T	SNV	1	C	T	49	28548	0.171641	57.5306	msh2	FALSE	CAN	JSY22	3	msh2-Rep3	CCA	C>T	A/T+1	G/C-1	CG>TA	CG>TA	GGACCCCAGGCAC	CAGGCAC	GGT	CCA	C	A	C>T	C>T_CCA	CG>TA_CAGGCAC	4	806	FALSE	FALSE
18_v.txt	32679	32679-SNV-C-T	SNV	1	C	T	74	28547	0.259222	59.3402	msh2	FALSE	CAN	JSY22	3	msh2-Rep3	CCA	C>T	A/T+1	G/C-1	CG>TA	CG>TA	TTTCTCCAATAAC	CAATAAC	GGT	CCA	C	A	C>T	C>T_CCA	CG>TA_CAATAAC	4	788	FALSE	FALSE
18_v.txt	32700	32700-SNV-C-T	SNV	1	C	T	35	28548	0.122601	58.2	msh2	FALSE	CAN	JSY22	3	msh2-Rep3	GCC	C>T	A/T+1	G/C-1	CG>TA	CG>TA	ACTGGGCCGGTAA	CCGGTAA	CGG	GCC	C	A	C>T	C>T_GCC	CG>TA_CCGGTAA	4	767	FALSE	FALSE
18_v.txt	32702	32702-SNV-G-A	SNV	1	G	A	26	28548	0.0910747	50.1538	msh2	FALSE	CAN	JSY22	3	msh2-Rep3	CGG	G>A	A/T+1	G/C-1	CG>TA	CG>TA	TGGGCCGGTAACC	GGTAACC	GCC	GCC	C	T	C>T	C>T_GCC	CG>TA_GGTAACC	4	765	FALSE	FALSE
18_v.txt	32749	32749-SNV-C-T	SNV	1	C	T	72	28548	0.252207	55.9583	msh2	FALSE	CAN	JSY22	3	msh2-Rep3	CCG	C>T	A/T+1	G/C-1	CG>TA	CG>TA	GAAACCCGATAAT	CGATAAT	GGC	CCG	C	A	C>T	C>T_CCG	CG>TA_CGATAAT	4	718	FALSE	FALSE
18_v.txt	32775	32775-SNV-G-A	SNV	1	G	A	31	28548	0.108589	51.2581	msh2	FALSE	CAN	JSY22	3	msh2-Rep3	AGC	G>A	A/T+1	G/C-1	CG>TA	CG>TA	ATGGAAGCGACCC	GCGACCC	TCG	TCG	C	T	C>T	C>T_TCG	CG>TA_GCGACCC	4	692	FALSE	FALSE
18_v.txt	32780	32780-SNV-C-T	SNV	1	C	T	161	28548	0.563962	47.166	msh2	FALSE	CAN	JSY22	3	msh2-Rep3	CCC	C>T	A/T+1	G/C-1	CG>TA	CG>TA	AGCGACCCAGAAC	CCAGAAC	GGG	CCC	C	A	C>T	C>T_CCC	CG>TA_CCAGAAC	4	687	FALSE	FALSE
18_v.txt	32796	32796-SNV-C-T	SNV	1	C	T	11	28548	0.0385316	39.636	msh2	FALSE	CAN	JSY22	3	msh2-Rep3	ACC	C>T	A/T+1	G/C-1	CG>TA	CG>TA	AATTCACCGTAAT	CCGTAAT	TGG	ACC	C	A	C>T	C>T_ACC	CG>TA_CCGTAAT	4	671	FALSE	FALSE
18_v.txt	32797	32797-SNV-C-T	SNV	1	C	T	54	28548	0.189155	45.2407	msh2	FALSE	CAN	JSY22	3	msh2-Rep3	CCG	C>T	A/T+1	G/C-1	CG>TA	CG>TA	ATTCACCGTAATA	CGTAATA	GGC	CCG	C	A	C>T	C>T_CCG	CG>TA_CGTAATA	4	670	FALSE	FALSE
18_v.txt	32798	32798-SNV-G-A	SNV	1	G	A	44	28548	0.154126	42.2718	msh2	FALSE	CAN	JSY22	3	msh2-Rep3	CGT	G>A	A/T+1	G/C-1	CG>TA	CG>TA	TTCACCGTAATAT	GTAATAT	GCA	GCA	C	T	C>T	C>T_GCA	CG>TA_GTAATAT	4	669	FALSE	FALSE
18_v.txt	32811	32811-SNV-G-A	SNV	1	G	A	107	28548	0.374807	45.0458	msh2	FALSE	CAN	JSY22	3	msh2-Rep3	AGG	G>A	A/T+1	G/C-1	CG>TA	CG>TA	TTGACAGGGAACA	GGGAACA	TCC	TCC	C	T	C>T	C>T_TCC	CG>TA_GGGAACA	4	656	FALSE	FALSE
18_v.txt	32855	32855-SNV-C-T	SNV	1	C	T	45	28549	0.157624	36.6	msh2	FALSE	CAN	JSY22	3	msh2-Rep3	TCC	C>T	A/T+1	G/C-1	CG>TA	CG>TA	ACTAATCCATGCC	CCATGCC	AGG	TCC	C	A	C>T	C>T_TCC	CG>TA_CCATGCC	4	612	FALSE	FALSE
18_v.txt	32880	32880-SNV-G-A	SNV	1	G	A	17	21619	0.0786345	35.0588	msh2	FALSE	CAN	JSY22	3	msh2-Rep3	CGT	G>A	A/T+1	G/C-1	CG>TA	CG>TA	TTGTACGTCCAAA	GTCCAAA	GCA	GCA	C	T	C>T	C>T_GCA	CG>TA_GTCCAAA	4	587	FALSE	FALSE
18_v.txt	32901	32901-SNV-C-T	SNV	1	C	T	42	21619	0.194274	32.8095	msh2	FALSE	CAN	JSY22	3	msh2-Rep3	GCC	C>T	A/T+1	G/C-1	CG>TA	CG>TA	ACTTGGCCAACTA	CCAACTA	CGG	GCC	C	A	C>T	C>T_GCC	CG>TA_CCAACTA	4	566	FALSE	FALSE
18_v.txt	32917	32917-SNV-C-T	SNV	1	C	T	32	21619	0.148018	46.5625	msh2	FALSE	CAN	JSY22	3	msh2-Rep3	TCC	C>T	A/T+1	G/C-1	CG>TA	CG>TA	TAAGTTCCAGGGC	CCAGGGC	AGG	TCC	C	A	C>T	C>T_TCC	CG>TA_CCAGGGC	4	550	FALSE	FALSE
18_v.txt	32935	32935-SNV-C-T	SNV	1	C	T	27	21619	0.12489	36	msh2	FALSE	CAN	JSY22	3	msh2-Rep3	GCC	C>T	A/T+1	G/C-1	CG>TA	CG>TA	TGATTGCCCAAGA	CCCAAGA	CGG	GCC	C	A	C>T	C>T_GCC	CG>TA_CCCAAGA	4	532	FALSE	FALSE
18_v.txt	32936	32936-SNV-C-T	SNV	1	C	T	179	21618	0.828014	49.2658	msh2	FALSE	CAN	JSY22	3	msh2-Rep3	CCC	C>T	A/T+1	G/C-1	CG>TA	CG>TA	GATTGCCCAAGAA	CCAAGAA	GGG	CCC	C	A	C>T	C>T_CCC	CG>TA_CCAAGAA	4	531	FALSE	FALSE
18_v.txt	32945	32945-SNV-C-T	SNV	1	C	T	122	21619	0.564318	57.5328	msh2	FALSE	CAN	JSY22	3	msh2-Rep3	ACC	C>T	A/T+1	G/C-1	CG>TA	CG>TA	AGAAAACCAATAC	CCAATAC	TGG	ACC	C	A	C>T	C>T_ACC	CG>TA_CCAATAC	4	522	FALSE	FALSE
18_v.txt	32958	32958-SNV-C-T	SNV	1	C	T	764	21619	3.53393	56.8783	msh2	FALSE	CAN	JSY22	3	msh2-Rep3	ACC	C>T	A/T+1	G/C-1	CG>TA	CG>TA	ATGTAACCATTGG	CCATTGG	TGG	ACC	C	A	C>T	C>T_ACC	CG>TA_CCATTGG	4	509	FALSE	FALSE
18_v.txt	32967	32967-SNV-G-A	SNV	1	G	A	45	21619	0.20815	59	msh2	FALSE	CAN	JSY22	3	msh2-Rep3	CGC	G>A	A/T+1	G/C-1	CG>TA	CG>TA	TTGGCCGCACCAA	GCACCAA	GCG	GCG	C	T	C>T	C>T_GCG	CG>TA_GCACCAA	4	500	FALSE	FALSE
18_v.txt	32970	32970-SNV-C-T	SNV	1	C	T	139	21619	0.642953	56.777	msh2	FALSE	CAN	JSY22	3	msh2-Rep3	ACC	C>T	A/T+1	G/C-1	CG>TA	CG>TA	GCCGCACCAAATG	CCAAATG	TGG	ACC	C	A	C>T	C>T_ACC	CG>TA_CCAAATG	4	497	FALSE	FALSE
18_v.txt	33056	33056-SNV-C-T	SNV	1	C	T	19	21619	0.0878857	54.2105	msh2	FALSE	CAN	JSY22	3	msh2-Rep3	GCG	C>T	A/T+1	G/C-1	CG>TA	CG>TA	GGACTGCGTGACA	CGTGACA	CGC	GCG	C	A	C>T	C>T_GCG	CG>TA_CGTGACA	4	411	FALSE	FALSE
18_v.txt	33070	33070-SNV-C-T	SNV	1	C	T	23	21619	0.106388	50.4783	msh2	FALSE	CAN	JSY22	3	msh2-Rep3	GCC	C>T	A/T+1	G/C-1	CG>TA	CG>TA	AATATGCCAAAGA	CCAAAGA	CGG	GCC	C	A	C>T	C>T_GCC	CG>TA_CCAAAGA	4	397	FALSE	FALSE
18_v.txt	33111	33111-SNV-G-A	SNV	1	G	A	55	21619	0.254406	39.9455	msh2	FALSE	CAN	JSY22	3	msh2-Rep3	TGG	G>A	A/T+1	G/C-1	CG>TA	CG>TA	CCCACTGGGCCGG	GGGCCGG	ACC	ACC	C	T	C>T	C>T_ACC	CG>TA_GGGCCGG	4	356	FALSE	FALSE
18_v.txt	33114	33114-SNV-C-T	SNV	1	C	T	22	21619	0.101762	46.1818	msh2	FALSE	CAN	JSY22	3	msh2-Rep3	GCC	C>T	A/T+1	G/C-1	CG>TA	CG>TA	ACTGGGCCGGCGT	CCGGCGT	CGG	GCC	C	A	C>T	C>T_GCC	CG>TA_CCGGCGT	4	353	FALSE	FALSE
18_v.txt	33153	33153-SNV-C-T	SNV	1	C	T	25	21619	0.115639	35.6396	msh2	FALSE	CAN	JSY22	3	msh2-Rep3	ACC	C>T	A/T+1	G/C-1	CG>TA	CG>TA	AAAAGACCTGTAC	CCTGTAC	TGG	ACC	C	A	C>T	C>T_ACC	CG>TA_CCTGTAC	4	314	FALSE	FALSE
18_v.txt	33159	33159-SNV-C-T	SNV	1	C	T	101	21621	0.467138	37.2277	msh2	FALSE	CAN	JSY22	3	msh2-Rep3	ACC	C>T	A/T+1	G/C-1	CG>TA	CG>TA	CCTGTACCAATAG	CCAATAG	TGG	ACC	C	A	C>T	C>T_ACC	CG>TA_CCAATAG	4	308	FALSE	FALSE
18_v.txt	33168	33168-SNV-C-T	SNV	1	C	T	61	21620	0.282146	37.918	msh2	FALSE	CAN	JSY22	3	msh2-Rep3	ACC	C>T	A/T+1	G/C-1	CG>TA	CG>TA	ATAGTACCACCAA	CCACCAA	TGG	ACC	C	A	C>T	C>T_ACC	CG>TA_CCACCAA	4	299	FALSE	FALSE
18_v.txt	33193	33193-SNV-G-A	SNV	1	G	A	19	26711	0.0711317	36.7895	msh2	FALSE	CAN	JSY22	3	msh2-Rep3	TGT	G>A	A/T+1	G/C-1	CG>TA	CG>TA	CAATATGTCTTTG	GTCTTTG	ACA	ACA	C	T	C>T	C>T_ACA	CG>TA_GTCTTTG	4	274	FALSE	FALSE
18_v.txt	33206	33206-SNV-C-T	SNV	1	C	T	4	26711	0.0149751	43.7403	msh2	FALSE	CAN	JSY22	3	msh2-Rep3	GCT	C>T	A/T+1	G/C-1	CG>TA	CG>TA	CTTAAGCTCTCTC	CTCTCTC	CGA	GCT	C	A	C>T	C>T_GCT	CG>TA_CTCTCTC	4	261	FALSE	FALSE
18_v.txt	33229	33229-SNV-G-A	SNV	1	G	A	136	26711	0.509154	38.1985	msh2	FALSE	CAN	JSY22	3	msh2-Rep3	TGT	G>A	A/T+1	G/C-1	CG>TA	CG>TA	CGTTCTGTACTTC	GTACTTC	ACA	ACA	C	T	C>T	C>T_ACA	CG>TA_GTACTTC	4	238	FALSE	FALSE
18_v.txt	33258	33258-SNV-C-T	SNV	1	C	T	30	26711	0.112313	40.4667	msh2	FALSE	CAN	JSY22	3	msh2-Rep3	GCC	C>T	A/T+1	G/C-1	CG>TA	CG>TA	CCTATGCCATCCT	CCATCCT	CGG	GCC	C	A	C>T	C>T_GCC	CG>TA_CCATCCT	4	209	FALSE	FALSE
18_v.txt	33276	33276-SNV-G-A	SNV	1	G	A	45	26711	0.16847	48.8	msh2	FALSE	CAN	JSY22	3	msh2-Rep3	CGT	G>A	A/T+1	G/C-1	CG>TA	CG>TA	GAGAACGTATCCT	GTATCCT	GCA	GCA	C	T	C>T	C>T_GCA	CG>TA_GTATCCT	4	191	FALSE	FALSE
18_v.txt	33309	33309-SNV-C-T	SNV	1	C	T	25	26710	0.0935979	51.7969	msh2	FALSE	CAN	JSY22	3	msh2-Rep3	GCG	C>T	A/T+1	G/C-1	CG>TA	CG>TA	AAAGAGCGCAATG	CGCAATG	CGC	GCG	C	A	C>T	C>T_GCG	CG>TA_CGCAATG	4	158	FALSE	FALSE
18_v.txt	33310	33310-SNV-G-A	SNV	1	G	A	24	26708	0.0898607	54.7737	msh2	FALSE	CAN	JSY22	3	msh2-Rep3	CGC	G>A	A/T+1	G/C-1	CG>TA	CG>TA	AAGAGCGCAATGG	GCAATGG	GCG	GCG	C	T	C>T	C>T_GCG	CG>TA_GCAATGG	4	157	FALSE	FALSE
18_v.txt	33412	33412-SNV-G-A	SNV	1	G	A	28	26711	0.104826	50.1429	msh2	FALSE	CAN	JSY22	3	msh2-Rep3	GGC	G>A	A/T+1	G/C-1	CG>TA	CG>TA	TGACCGGCTCATT	GCTCATT	CCG	CCG	C	T	C>T	C>T_CCG	CG>TA_GCTCATT	4	55	FALSE	FALSE
18_v.txt	33474	33474-SNV-C-T	SNV	1	C	T	40	26711	0.149751	34.525	msh2	FALSE	CAN	JSY22	3	msh2-Rep3	GCC	C>T	A/T+1	G/C-1	CG>TA	CG>TA	GCTATGCCTTTTT	CCTTTTT	CGG	GCC	C	A	C>T	C>T_GCC	CG>TA_CCTTTTT	4	N_A	FALSE	FALSE
18_v.txt	32158	32158-SNV-C-G	SNV	1	C	G	587	21860	2.68527	50.0937	msh2	FALSE	CAN	JSY22	3	msh2-Rep3	GCC	C>G	G/C+1	G/C-1	CG>GC	CG>GC	TGTAAGCCAAAGC	CCAAAGC	CGG	GCC	C	C	C>G	C>G_GCC	CG>GC_CCAAAGC	4	1309	FALSE	FALSE
18_v.txt	32165	32165-SNV-G-C	SNV	1	G	C	3	21860	0.0137237	26.6703	msh2	FALSE	CAN	JSY22	3	msh2-Rep3	CGC	G>C	G/C+1	G/C-1	CG>GC	CG>GC	CAAAGCGCCAAAT	GCCAAAT	GCG	GCG	C	G	C>G	C>G_GCG	CG>GC_GCCAAAT	4	1302	FALSE	FALSE
18_v.txt	32299	32299-SNV-C-G	SNV	1	C	G	3	32217	0.009312	64	msh2	FALSE	CAN	JSY22	3	msh2-Rep3	GCG	C>G	G/C+1	G/C-1	CG>GC	CG>GC	AATTTGCGGCAGA	CGGCAGA	CGC	GCG	C	C	C>G	C>G_GCG	CG>GC_CGGCAGA	4	1168	FALSE	FALSE
18_v.txt	32448	32448-SNV-C-G	SNV	1	C	G	1	32217	0.003104	60.9931	msh2	FALSE	CAN	JSY22	3	msh2-Rep3	TCC	C>G	G/C+1	G/C-1	CG>GC	CG>GC	AAAAGTCCAATGA	CCAATGA	AGG	TCC	C	C	C>G	C>G_TCC	CG>GC_CCAATGA	4	1019	FALSE	FALSE
18_v.txt	32449	32449-SNV-C-G	SNV	1	C	G	21	32216	0.065185	49.4286	msh2	FALSE	CAN	JSY22	3	msh2-Rep3	CCA	C>G	G/C+1	G/C-1	CG>GC	CG>GC	AAAGTCCAATGAA	CAATGAA	GGT	CCA	C	C	C>G	C>G_CCA	CG>GC_CAATGAA	4	1018	FALSE	FALSE
18_v.txt	32530	32530-SNV-G-C	SNV	1	G	C	3	32217	0.009312	36.6653	msh2	FALSE	CAN	JSY22	3	msh2-Rep3	GGG	G>C	G/C+1	G/C-1	CG>GC	CG>GC	TTCTGGGGTTTGC	GGTTTGC	CCC	CCC	C	G	C>G	C>G_CCC	CG>GC_GGTTTGC	4	937	FALSE	FALSE
18_v.txt	32566	32566-SNV-C-G	SNV	1	C	G	8	28532	0.0280387	37.875	msh2	FALSE	CAN	JSY22	3	msh2-Rep3	TCA	C>G	G/C+1	G/C-1	CG>GC	CG>GC	CTAGTTCAGTACC	CAGTACC	AGT	TCA	C	C	C>G	C>G_TCA	CG>GC_CAGTACC	4	901	FALSE	FALSE
18_v.txt	32839	32839-SNV-C-G	SNV	1	C	G	3	28548	0.0105086	38	msh2	FALSE	CAN	JSY22	3	msh2-Rep3	ACC	C>G	G/C+1	G/C-1	CG>GC	CG>GC	TAATTACCCAAAA	CCCAAAA	TGG	ACC	C	C	C>G	C>G_ACC	CG>GC_CCCAAAA	4	628	FALSE	FALSE
18_v.txt	32935	32935-SNV-C-G	SNV	1	C	G	1	21619	0.004626	50	msh2	FALSE	CAN	JSY22	3	msh2-Rep3	GCC	C>G	G/C+1	G/C-1	CG>GC	CG>GC	TGATTGCCCAAGA	CCCAAGA	CGG	GCC	C	C	C>G	C>G_GCC	CG>GC_CCCAAGA	4	532	FALSE	FALSE
18_v.txt	33056	33056-SNV-C-G	SNV	1	C	G	3	21619	0.0138767	64	msh2	FALSE	CAN	JSY22	3	msh2-Rep3	GCG	C>G	G/C+1	G/C-1	CG>GC	CG>GC	GGACTGCGTGACA	CGTGACA	CGC	GCG	C	C	C>G	C>G_GCG	CG>GC_CGTGACA	4	411	FALSE	FALSE
18_v.txt	33160	33160-SNV-C-G	SNV	1	C	G	14	21621	0.0647519	37.5716	msh2	FALSE	CAN	JSY22	3	msh2-Rep3	CCA	C>G	G/C+1	G/C-1	CG>GC	CG>GC	CTGTACCAATAGT	CAATAGT	GGT	CCA	C	C	C>G	C>G_CCA	CG>GC_CAATAGT	4	307	FALSE	FALSE
18_v.txt	33168	33168-SNV-C-G	SNV	1	C	G	8	21620	0.0370028	38	msh2	FALSE	CAN	JSY22	3	msh2-Rep3	ACC	C>G	G/C+1	G/C-1	CG>GC	CG>GC	ATAGTACCACCAA	CCACCAA	TGG	ACC	C	C	C>G	C>G_ACC	CG>GC_CCACCAA	4	299	FALSE	FALSE
18_v.txt	32027	32027-SNV-G-T	SNV	1	G	T	27	21860	0.123513	54.4815	msh2	FALSE	CAN	JSY22	3	msh2-Rep3	GGT	G>T	A/T+1	G/C-1	CG>AT	CG>AT	GCCACGGTATTTC	GTATTTC	CCA	CCA	C	A	C>A	C>A_CCA	CG>AT_GTATTTC	4	1440	FALSE	FALSE
18_v.txt	32058	32058-SNV-G-T	SNV	1	G	T	14	21860	0.0640439	55.6429	msh2	FALSE	CAN	JSY22	3	msh2-Rep3	CGA	G>T	A/T+1	G/C-1	CG>AT	CG>AT	ATGTGCGAGATTG	GAGATTG	GCT	GCT	C	A	C>A	C>A_GCT	CG>AT_GAGATTG	4	1409	FALSE	FALSE
18_v.txt	32089	32089-SNV-C-A	SNV	1	C	A	321	21859	1.4685	61.0094	msh2	FALSE	CAN	JSY22	3	msh2-Rep3	CCT	C>A	A/T+1	G/C-1	CG>AT	CG>AT	AAAAGCCTGCAAC	CTGCAAC	GGA	CCT	C	T	C>A	C>A_CCT	CG>AT_CTGCAAC	4	1378	FALSE	FALSE
18_v.txt	32149	32149-SNV-C-A	SNV	1	C	A	15	21860	0.0686185	45.7333	msh2	FALSE	CAN	JSY22	3	msh2-Rep3	TCC	C>A	A/T+1	G/C-1	CG>AT	CG>AT	ATGTCTCCATGTA	CCATGTA	AGG	TCC	C	T	C>A	C>A_TCC	CG>AT_CCATGTA	4	1318	FALSE	FALSE
18_v.txt	32188	32188-SNV-C-A	SNV	1	C	A	33	21860	0.150961	41.303	msh2	FALSE	CAN	JSY22	3	msh2-Rep3	ACT	C>A	A/T+1	G/C-1	CG>AT	CG>AT	CGAAAACTGCAAT	CTGCAAT	TGA	ACT	C	T	C>A	C>A_ACT	CG>AT_CTGCAAT	4	1279	FALSE	FALSE
18_v.txt	32272	32272-SNV-G-T	SNV	1	G	T	61	32217	0.189341	33.9667	msh2	FALSE	CAN	JSY22	3	msh2-Rep3	CGG	G>T	A/T+1	G/C-1	CG>AT	CG>AT	AAATACGGGAACC	GGGAACC	GCC	GCC	C	A	C>A	C>A_GCC	CG>AT_GGGAACC	4	1195	FALSE	FALSE
18_v.txt	32274	32274-SNV-G-T	SNV	1	G	T	38	32217	0.11795	35	msh2	FALSE	CAN	JSY22	3	msh2-Rep3	GGA	G>T	A/T+1	G/C-1	CG>AT	CG>AT	ATACGGGAACCAA	GAACCAA	CCT	CCT	C	A	C>A	C>A_CCT	CG>AT_GAACCAA	4	1193	FALSE	FALSE
18_v.txt	32373	32373-SNV-G-T	SNV	1	G	T	76	32217	0.2359	59.8158	msh2	FALSE	CAN	JSY22	3	msh2-Rep3	AGC	G>T	A/T+1	G/C-1	CG>AT	CG>AT	TCAATAGCAATAA	GCAATAA	TCG	TCG	C	A	C>A	C>A_TCG	CG>AT_GCAATAA	4	1094	FALSE	FALSE
18_v.txt	32399	32399-SNV-G-T	SNV	1	G	T	77	32217	0.239004	57.7273	msh2	FALSE	CAN	JSY22	3	msh2-Rep3	CGT	G>T	A/T+1	G/C-1	CG>AT	CG>AT	AGAAACGTAGGAA	GTAGGAA	GCA	GCA	C	A	C>A	C>A_GCA	CG>AT_GTAGGAA	4	1068	FALSE	FALSE
18_v.txt	32449	32449-SNV-C-A	SNV	1	C	A	104	32216	0.322821	51.1635	msh2	FALSE	CAN	JSY22	3	msh2-Rep3	CCA	C>A	A/T+1	G/C-1	CG>AT	CG>AT	AAAGTCCAATGAA	CAATGAA	GGT	CCA	C	T	C>A	C>A_CCA	CG>AT_CAATGAA	4	1018	FALSE	FALSE
18_v.txt	32474	32474-SNV-G-T	SNV	1	G	T	153	32217	0.474905	48.4902	msh2	FALSE	CAN	JSY22	3	msh2-Rep3	AGA	G>T	A/T+1	G/C-1	CG>AT	CG>AT	AATGTAGAAGGTT	GAAGGTT	TCT	TCT	C	A	C>A	C>A_TCT	CG>AT_GAAGGTT	4	993	FALSE	FALSE
18_v.txt	32488	32488-SNV-G-T	SNV	1	G	T	106	32217	0.329019	45.7891	msh2	FALSE	CAN	JSY22	3	msh2-Rep3	CGG	G>T	A/T+1	G/C-1	CG>AT	CG>AT	AGATACGGAAAAC	GGAAAAC	GCC	GCC	C	A	C>A	C>A_GCC	CG>AT_GGAAAAC	4	979	FALSE	FALSE
18_v.txt	32508	32508-SNV-G-T	SNV	1	G	T	11	32217	0.0341435	44.2727	msh2	FALSE	CAN	JSY22	3	msh2-Rep3	GGC	G>T	A/T+1	G/C-1	CG>AT	CG>AT	TTGATGGCTCTTG	GCTCTTG	CCG	CCG	C	A	C>A	C>A_CCG	CG>AT_GCTCTTG	4	959	FALSE	FALSE
18_v.txt	32529	32529-SNV-G-T	SNV	1	G	T	277	32217	0.859795	42.1685	msh2	FALSE	CAN	JSY22	3	msh2-Rep3	GGG	G>T	A/T+1	G/C-1	CG>AT	CG>AT	TTTCTGGGGTTTG	GGGTTTG	CCC	CCC	C	A	C>A	C>A_CCC	CG>AT_GGGTTTG	4	938	FALSE	FALSE
18_v.txt	32530	32530-SNV-G-T	SNV	1	G	T	165	32217	0.512152	38.7505	msh2	FALSE	CAN	JSY22	3	msh2-Rep3	GGG	G>T	A/T+1	G/C-1	CG>AT	CG>AT	TTCTGGGGTTTGC	GGTTTGC	CCC	CCC	C	A	C>A	C>A_CCC	CG>AT_GGTTTGC	4	937	FALSE	FALSE
18_v.txt	32535	32535-SNV-G-T	SNV	1	G	T	2	32217	0.006208	36.9981	msh2	FALSE	CAN	JSY22	3	msh2-Rep3	TGC	G>T	A/T+1	G/C-1	CG>AT	CG>AT	GGGTTTGCAGCTT	GCAGCTT	ACG	ACG	C	A	C>A	C>A_ACG	CG>AT_GCAGCTT	4	932	FALSE	FALSE
18_v.txt	32538	32538-SNV-G-T	SNV	1	G	T	18	32217	0.0558711	34.9444	msh2	FALSE	CAN	JSY22	3	msh2-Rep3	AGC	G>T	A/T+1	G/C-1	CG>AT	CG>AT	TTTGCAGCTTCAC	GCTTCAC	TCG	TCG	C	A	C>A	C>A_TCG	CG>AT_GCTTCAC	4	929	FALSE	FALSE
18_v.txt	32547	32547-SNV-G-T	SNV	1	G	T	22	32216	0.068289	33.9091	msh2	FALSE	CAN	JSY22	3	msh2-Rep3	AGC	G>T	A/T+1	G/C-1	CG>AT	CG>AT	TCACCAGCAGTGA	GCAGTGA	TCG	TCG	C	A	C>A	C>A_TCG	CG>AT_GCAGTGA	4	920	FALSE	FALSE
18_v.txt	32572	32572-SNV-C-A	SNV	1	C	A	15	28548	0.0525431	35	msh2	FALSE	CAN	JSY22	3	msh2-Rep3	CCT	C>A	A/T+1	G/C-1	CG>AT	CG>AT	CAGTACCTTGAAA	CTTGAAA	GGA	CCT	C	T	C>A	C>A_CCT	CG>AT_CTTGAAA	4	895	FALSE	FALSE
18_v.txt	32783	32783-SNV-G-T	SNV	1	G	T	21	28548	0.0735603	39.619	msh2	FALSE	CAN	JSY22	3	msh2-Rep3	AGA	G>T	A/T+1	G/C-1	CG>AT	CG>AT	GACCCAGAACTCG	GAACTCG	TCT	TCT	C	A	C>A	C>A_TCT	CG>AT_GAACTCG	4	684	FALSE	FALSE
18_v.txt	32797	32797-SNV-C-A	SNV	1	C	A	27	28548	0.0945776	45.6296	msh2	FALSE	CAN	JSY22	3	msh2-Rep3	CCG	C>A	A/T+1	G/C-1	CG>AT	CG>AT	ATTCACCGTAATA	CGTAATA	GGC	CCG	C	T	C>A	C>A_CCG	CG>AT_CGTAATA	4	670	FALSE	FALSE
18_v.txt	32812	32812-SNV-G-T	SNV	1	G	T	17	28548	0.0595488	41.9221	msh2	FALSE	CAN	JSY22	3	msh2-Rep3	GGG	G>T	A/T+1	G/C-1	CG>AT	CG>AT	TGACAGGGAACAA	GGAACAA	CCC	CCC	C	A	C>A	C>A_CCC	CG>AT_GGAACAA	4	655	FALSE	FALSE
18_v.txt	32819	32819-SNV-G-T	SNV	1	G	T	158	28548	0.553454	43.8544	msh2	FALSE	CAN	JSY22	3	msh2-Rep3	AGT	G>T	A/T+1	G/C-1	CG>AT	CG>AT	GAACAAGTTCATT	GTTCATT	TCA	TCA	C	A	C>A	C>A_TCA	CG>AT_GTTCATT	4	648	FALSE	FALSE
18_v.txt	32935	32935-SNV-C-A	SNV	1	C	A	6	21619	0.0277534	33.8333	msh2	FALSE	CAN	JSY22	3	msh2-Rep3	GCC	C>A	A/T+1	G/C-1	CG>AT	CG>AT	TGATTGCCCAAGA	CCCAAGA	CGG	GCC	C	T	C>A	C>A_GCC	CG>AT_CCCAAGA	4	532	FALSE	FALSE
18_v.txt	32940	32940-SNV-G-T	SNV	1	G	T	89	21619	0.411675	53.3395	msh2	FALSE	CAN	JSY22	3	msh2-Rep3	AGA	G>T	A/T+1	G/C-1	CG>AT	CG>AT	GCCCAAGAAAACC	GAAAACC	TCT	TCT	C	A	C>A	C>A_TCT	CG>AT_GAAAACC	4	527	FALSE	FALSE
18_v.txt	33015	33015-SNV-G-T	SNV	1	G	T	25	21619	0.115639	54.56	msh2	FALSE	CAN	JSY22	3	msh2-Rep3	GGA	G>T	A/T+1	G/C-1	CG>AT	CG>AT	AAAGAGGATGTAA	GATGTAA	CCT	CCT	C	A	C>A	C>A_CCT	CG>AT_GATGTAA	4	452	FALSE	FALSE
18_v.txt	33043	33043-SNV-C-A	SNV	1	C	A	25	21619	0.115639	60.04	msh2	FALSE	CAN	JSY22	3	msh2-Rep3	TCA	C>A	A/T+1	G/C-1	CG>AT	CG>AT	CCATTTCACCCAA	CACCCAA	AGT	TCA	C	T	C>A	C>A_TCA	CG>AT_CACCCAA	4	424	FALSE	FALSE
18_v.txt	33111	33111-SNV-G-T	SNV	1	G	T	4	21619	0.0185022	57.5	msh2	FALSE	CAN	JSY22	3	msh2-Rep3	TGG	G>T	A/T+1	G/C-1	CG>AT	CG>AT	CCCACTGGGCCGG	GGGCCGG	ACC	ACC	C	A	C>A	C>A_ACC	CG>AT_GGGCCGG	4	356	FALSE	FALSE
18_v.txt	33114	33114-SNV-C-A	SNV	1	C	A	11	21619	0.0508812	42.7273	msh2	FALSE	CAN	JSY22	3	msh2-Rep3	GCC	C>A	A/T+1	G/C-1	CG>AT	CG>AT	ACTGGGCCGGCGT	CCGGCGT	CGG	GCC	C	T	C>A	C>A_GCC	CG>AT_CCGGCGT	4	353	FALSE	FALSE
18_v.txt	33154	33154-SNV-C-A	SNV	1	C	A	209	21619	0.966742	37.4589	msh2	FALSE	CAN	JSY22	3	msh2-Rep3	CCT	C>A	A/T+1	G/C-1	CG>AT	CG>AT	AAAGACCTGTACC	CTGTACC	GGA	CCT	C	T	C>A	C>A_CCT	CG>AT_CTGTACC	4	313	FALSE	FALSE
18_v.txt	33159	33159-SNV-C-A	SNV	1	C	A	13	21621	0.0601267	38	msh2	FALSE	CAN	JSY22	3	msh2-Rep3	ACC	C>A	A/T+1	G/C-1	CG>AT	CG>AT	CCTGTACCAATAG	CCAATAG	TGG	ACC	C	T	C>A	C>A_ACC	CG>AT_CCAATAG	4	308	FALSE	FALSE
18_v.txt	33235	33235-SNV-C-A	SNV	1	C	A	33	26711	0.123545	33.5152	msh2	FALSE	CAN	JSY22	3	msh2-Rep3	TCT	C>A	A/T+1	G/C-1	CG>AT	CG>AT	GTACTTCTCCTTC	CTCCTTC	AGA	TCT	C	T	C>A	C>A_TCT	CG>AT_CTCCTTC	4	232	FALSE	FALSE
18_v.txt	33238	33238-SNV-C-A	SNV	1	C	A	91	26711	0.340684	39.1758	msh2	FALSE	CAN	JSY22	3	msh2-Rep3	CCT	C>A	A/T+1	G/C-1	CG>AT	CG>AT	CTTCTCCTTCATC	CTTCATC	GGA	CCT	C	T	C>A	C>A_CCT	CG>AT_CTTCATC	4	229	FALSE	FALSE
18_v.txt	33325	33325-SNV-C-A	SNV	1	C	A	170	26711	0.636442	59.3765	msh2	FALSE	CAN	JSY22	3	msh2-Rep3	TCT	C>A	A/T+1	G/C-1	CG>AT	CG>AT	ACAATTCTTTACT	CTTTACT	AGA	TCT	C	T	C>A	C>A_TCT	CG>AT_CTTTACT	4	142	FALSE	FALSE
18_v.txt	33436	33436-SNV-C-A	SNV	1	C	A	21	26711	0.0786193	38.1905	msh2	FALSE	CAN	JSY22	3	msh2-Rep3	TCT	C>A	A/T+1	G/C-1	CG>AT	CG>AT	TCTCCTCTATGTC	CTATGTC	AGA	TCT	C	T	C>A	C>A_TCT	CG>AT_CTATGTC	4	31	FALSE	FALSE
18_v.txt	33474	33474-SNV-C-A	SNV	1	C	A	55	26711	0.205908	32.6182	msh2	FALSE	CAN	JSY22	3	msh2-Rep3	GCC	C>A	A/T+1	G/C-1	CG>AT	CG>AT	GCTATGCCTTTTT	CCTTTTT	CGG	GCC	C	T	C>A	C>A_GCC	CG>AT_CCTTTTT	4	N_A	FALSE	FALSE
18_v.txt	32088	32088-MNV-CC-TA	MNV	2	CC	TA	1	21860	0.004575	64	msh2	FALSE	CAN	JSY22	3	msh2-Rep3	GCC	nope	>1bp-ins	>1bpdel	none	MNV	AAAAAGCCTGCAA	CCTGCAA	CGG	GCC	CC	none	NA	NA_GCC	MNV_CCTGCAA	4	1379	FALSE	FALSE
18_v.txt	32088	32088-MNV-CC-TT	MNV	2	CC	TT	1	21860	0.004575	35.0013	msh2	FALSE	CAN	JSY22	3	msh2-Rep3	GCC	nope	>1bp-ins	>1bpdel	none	MNV	AAAAAGCCTGCAA	CCTGCAA	CGG	GCC	CC	none	NA	NA_GCC	MNV_CCTGCAA	4	1379	FALSE	FALSE
18_v.txt	32938	32938-MNV-AA-TG	MNV	2	AA	TG	27	21619	0.12489	56.3702	msh2	FALSE	CAN	JSY22	3	msh2-Rep3	CAA	nope	>1bp-ins	>1bpdel	none	MNV	TTGCCCAAGAAAA	AAGAAAA	GTT	CAA	AA	none	NA	NA_CAA	MNV_AAGAAAA	4	529	FALSE	FALSE
18_v.txt	31723	31723-Insertion---A	Insertion	1	-	A	2	7587	0.0263609	64	msh2	FALSE	CAN	JSY22	3	msh2-Rep3	CAA	nope	A/T+1	>1bpdel	none	A/T+1	TGTCCCAAAAAGT	AAAAAGT	GTT	CAA	-	T	NA	NA_CAA	A/T+1_AAAAAGT	4	1744	FALSE	FALSE
18_v.txt	32081	32081-Insertion---A	Insertion	1	-	A	204	21860	0.933211	63.4069	msh2	FALSE	CAN	JSY22	3	msh2-Rep3	CAA	nope	A/T+1	>1bpdel	none	A/T+1	CCATGCAAAAAAG	AAAAAAG	GTT	CAA	-	T	NA	NA_CAA	A/T+1_AAAAAAG	4	1386	FALSE	FALSE
18_v.txt	32160	32160-Insertion---A	Insertion	1	-	A	32	21860	0.146386	49.0625	msh2	FALSE	CAN	JSY22	3	msh2-Rep3	CAA	nope	A/T+1	>1bpdel	none	A/T+1	TAAGCCAAAGCGC	AAAGCGC	GTT	CAA	-	T	NA	NA_CAA	A/T+1_AAAGCGC	4	1307	FALSE	FALSE
18_v.txt	32346	32346-Insertion---A	Insertion	1	-	A	68	32217	0.211069	61.9853	msh2	FALSE	CAN	JSY22	3	msh2-Rep3	CAA	nope	A/T+1	>1bpdel	none	A/T+1	TGTGGCAAAACCT	AAAACCT	GTT	CAA	-	T	NA	NA_CAA	A/T+1_AAAACCT	4	1121	FALSE	FALSE
18_v.txt	32442	32442-Insertion---A	Insertion	1	-	A	26	32217	0.0807027	54.6923	msh2	FALSE	CAN	JSY22	3	msh2-Rep3	TAA	nope	A/T+1	>1bpdel	none	A/T+1	GGAACTAAAAGTC	AAAAGTC	ATT	TAA	-	T	NA	NA_TAA	A/T+1_AAAAGTC	4	1025	FALSE	FALSE
18_v.txt	32498	32498-Insertion---T	Insertion	1	-	T	109	32217	0.338331	42.3945	msh2	FALSE	CAN	JSY22	3	msh2-Rep3	CTT	nope	A/T+1	>1bpdel	none	A/T+1	AACAACTTTTTTG	TTTTTTG	GAA	CTT	-	A	NA	NA_CTT	A/T+1_TTTTTTG	4	969	FALSE	FALSE
18_v.txt	32522	32522-Insertion---T	Insertion	1	-	T	2	32217	0.006208	37.5	msh2	FALSE	CAN	JSY22	3	msh2-Rep3	ATT	nope	A/T+1	>1bpdel	none	A/T+1	AACGGATTTTCTG	TTTTCTG	TAA	ATT	-	A	NA	NA_ATT	A/T+1_TTTTCTG	4	945	FALSE	FALSE
18_v.txt	32631	32631-Insertion---T	Insertion	1	-	T	56	28548	0.196161	52.5714	msh2	FALSE	CAN	JSY22	3	msh2-Rep3	GTT	nope	A/T+1	>1bpdel	none	A/T+1	CCTTCGTTTTTAT	TTTTTAT	CAA	GTT	-	A	NA	NA_GTT	A/T+1_TTTTTAT	4	836	FALSE	FALSE
18_v.txt	32658	32658-Insertion---C	Insertion	1	-	C	18	28548	0.0630517	57.6111	msh2	FALSE	CAN	JSY22	3	msh2-Rep3	ACC	nope	G/C+1	>1bpdel	none	G/C+1	CCTGGACCCCAGG	CCCCAGG	TGG	ACC	-	G	NA	NA_ACC	G/C+1_CCCCAGG	4	809	FALSE	FALSE
18_v.txt	32728	32728-Insertion---A	Insertion	1	-	A	219	28548	0.767129	60.9863	msh2	FALSE	CAN	JSY22	3	msh2-Rep3	CAA	nope	A/T+1	>1bpdel	none	A/T+1	CCATACAAAAACA	AAAAACA	GTT	CAA	-	T	NA	NA_CAA	A/T+1_AAAAACA	4	739	FALSE	FALSE
18_v.txt	32760	32760-Insertion---A	Insertion	1	-	A	12	28548	0.0420345	57.5	msh2	FALSE	CAN	JSY22	3	msh2-Rep3	TAA	nope	A/T+1	>1bpdel	none	A/T+1	ATGGCTAAAACTT	AAAACTT	ATT	TAA	-	T	NA	NA_TAA	A/T+1_AAAACTT	4	707	FALSE	FALSE
18_v.txt	32842	32842-Insertion---A	Insertion	1	-	A	1014	28548	3.55191	42.2446	msh2	FALSE	CAN	JSY22	3	msh2-Rep3	CAA	nope	A/T+1	>1bpdel	none	A/T+1	TTACCCAAAAAAT	AAAAAAT	GTT	CAA	-	T	NA	NA_CAA	A/T+1_AAAAAAT	4	625	FALSE	FALSE
18_v.txt	32842	32842-Insertion---AA	Insertion	2	-	AA	2	28548	0.007006	51	msh2	FALSE	CAN	JSY22	3	msh2-Rep3	CAA	nope	>1bp-ins	>1bpdel	none	>1bp-ins	TTACCCAAAAAAT	AAAAAAT	GTT	CAA	-	none	NA	NA_CAA	>1bp-ins_AAAAAAT	4	625	FALSE	FALSE
18_v.txt	32843	32843-Insertion---C	Insertion	1	-	C	1	28548	0.003503	21	msh2	FALSE	CAN	JSY22	3	msh2-Rep3	AAA	nope	G/C+1	>1bpdel	none	G/C+1	TACCCAAAAAATA	AAAAATA	TTT	AAA	-	G	NA	NA_AAA	G/C+1_AAAAATA	4	624	FALSE	FALSE
18_v.txt	32972	32972-Insertion---A	Insertion	1	-	A	16	21619	0.074009	61.6875	msh2	FALSE	CAN	JSY22	3	msh2-Rep3	CAA	nope	A/T+1	>1bpdel	none	A/T+1	CGCACCAAATGCT	AAATGCT	GTT	CAA	-	T	NA	NA_CAA	A/T+1_AAATGCT	4	495	FALSE	FALSE
18_v.txt	33206	33206-Insertion---CT	Insertion	2	-	CT	26	26711	0.0973382	39.0769	msh2	FALSE	CAN	JSY22	3	msh2-Rep3	GCT	nope	>1bp-ins	>1bpdel	none	>1bp-ins	CTTAAGCTCTCTC	CTCTCTC	CGA	GCT	-	none	NA	NA_GCT	>1bp-ins_CTCTCTC	4	261	FALSE	FALSE
18_v.txt	32448	32448-Deletion-CC--	Deletion	2	CC	-	4	32217	0.0124158	59	msh2	FALSE	CAN	JSY22	3	msh2-Rep3	TCC	nope	>1bp-ins	>1bpdel	none	>1bpdel	AAAAGTCCAATGA	CCAATGA	AGG	TCC	CC	none	NA	NA_TCC	>1bpdel_CCAATGA	4	1019	FALSE	FALSE
18_v.txt	33094	33094-Deletion-AT--	Deletion	2	AT	-	8	21619	0.0370045	54.25	msh2	FALSE	CAN	JSY22	3	msh2-Rep3	GAT	nope	>1bp-ins	>1bpdel	none	>1bpdel	AATATGATATAAG	ATATAAG	CTA	GAT	AT	none	NA	NA_GAT	>1bpdel_ATATAAG	4	373	FALSE	FALSE
18_v.txt	33189	33189-Deletion-AT--	Deletion	2	AT	-	52	26712	0.194669	37.5577	msh2	FALSE	CAN	JSY22	3	msh2-Rep3	AAT	nope	>1bp-ins	>1bpdel	none	>1bpdel	ATACCAATATGTC	ATATGTC	TTA	AAT	AT	none	NA	NA_AAT	>1bpdel_ATATGTC	4	278	FALSE	FALSE
18_v.txt	33206	33206-Deletion-CT--	Deletion	2	CT	-	209	26711	0.782449	38.5167	msh2	FALSE	CAN	JSY22	3	msh2-Rep3	GCT	nope	>1bp-ins	>1bpdel	none	>1bpdel	CTTAAGCTCTCTC	CTCTCTC	CGA	GCT	CT	none	NA	NA_GCT	>1bpdel_CTCTCTC	4	261	FALSE	FALSE
18_v.txt	31723	31723-Deletion-A--	Deletion	1	A	-	12	7587	0.158165	56.8333	msh2	FALSE	CAN	JSY22	3	msh2-Rep3	CAA	nope	>1bp-ins	A/T-1	none	A/T-1	TGTCCCAAAAAGT	AAAAAGT	GTT	GTT	T	none	T>none	T>none_GTT	A/T-1_AAAAAGT	4	1744	FALSE	FALSE
18_v.txt	31846	31846-Deletion-A--	Deletion	1	A	-	5	7587	0.0659022	45	msh2	FALSE	CAN	JSY22	3	msh2-Rep3	CAA	nope	>1bp-ins	A/T-1	none	A/T-1	AGATCCAAACAGC	AAACAGC	GTT	GTT	T	none	T>none	T>none_GTT	A/T-1_AAACAGC	4	1621	FALSE	FALSE
18_v.txt	31859	31859-Deletion-C--	Deletion	1	C	-	48	7587	0.632661	46.875	msh2	FALSE	CAN	JSY22	3	msh2-Rep3	ACA	nope	>1bp-ins	G/C-1	none	G/C-1	TAAGAACAGGAAA	CAGGAAA	TGT	ACA	C	none	nope	nope_ACA	G/C-1_CAGGAAA	4	1608	FALSE	FALSE
18_v.txt	31863	31863-Deletion-A--	Deletion	1	A	-	98	7587	1.29168	46.5714	msh2	FALSE	CAN	JSY22	3	msh2-Rep3	GAA	nope	>1bp-ins	A/T-1	none	A/T-1	AACAGGAAAATAG	AAAATAG	CTT	CTT	T	none	T>none	T>none_CTT	A/T-1_AAAATAG	4	1604	FALSE	FALSE
18_v.txt	31904	31904-Deletion-T--	Deletion	1	T	-	11	7587	0.144985	43.3636	msh2	FALSE	CAN	JSY22	3	msh2-Rep3	ATT	nope	>1bp-ins	A/T-1	none	A/T-1	ATTGAATTTTGGT	TTTTGGT	TAA	ATT	T	none	nope	nope_ATT	A/T-1_TTTTGGT	4	1563	FALSE	FALSE
18_v.txt	31908	31908-Deletion-G--	Deletion	1	G	-	6	7587	0.0790826	38	msh2	FALSE	CAN	JSY22	3	msh2-Rep3	TGG	nope	>1bp-ins	G/C-1	none	G/C-1	AATTTTGGTGCAA	GGTGCAA	ACC	ACC	C	none	C>none	C>none_ACC	G/C-1_GGTGCAA	4	1559	FALSE	FALSE
18_v.txt	31913	31913-Deletion-A--	Deletion	1	A	-	31	7587	0.408594	38.129	msh2	FALSE	CAN	JSY22	3	msh2-Rep3	CAA	nope	>1bp-ins	A/T-1	none	A/T-1	TGGTGCAAAAGCC	AAAAGCC	GTT	GTT	T	none	T>none	T>none_GTT	A/T-1_AAAAGCC	4	1554	FALSE	FALSE
18_v.txt	31972	31972-Deletion-C--	Deletion	1	C	-	5	21860	0.0228728	34.2	msh2	FALSE	CAN	JSY22	3	msh2-Rep3	GCC	nope	>1bp-ins	G/C-1	none	G/C-1	AATAAGCCAAGCC	CCAAGCC	CGG	GCC	C	none	nope	nope_GCC	G/C-1_CCAAGCC	4	1495	FALSE	FALSE
18_v.txt	32081	32081-Deletion-A--	Deletion	1	A	-	1259	21860	5.75938	62.8999	msh2	FALSE	CAN	JSY22	3	msh2-Rep3	CAA	nope	>1bp-ins	A/T-1	none	A/T-1	CCATGCAAAAAAG	AAAAAAG	GTT	GTT	T	none	T>none	T>none_GTT	A/T-1_AAAAAAG	4	1386	FALSE	FALSE
18_v.txt	32088	32088-Deletion-C--	Deletion	1	C	-	1	21860	0.004575	64	msh2	FALSE	CAN	JSY22	3	msh2-Rep3	GCC	nope	>1bp-ins	G/C-1	none	G/C-1	AAAAAGCCTGCAA	CCTGCAA	CGG	GCC	C	none	nope	nope_GCC	G/C-1_CCTGCAA	4	1379	FALSE	FALSE
18_v.txt	32149	32149-Deletion-C--	Deletion	1	C	-	2	21860	0.009149	51	msh2	FALSE	CAN	JSY22	3	msh2-Rep3	TCC	nope	>1bp-ins	G/C-1	none	G/C-1	ATGTCTCCATGTA	CCATGTA	AGG	TCC	C	none	nope	nope_TCC	G/C-1_CCATGTA	4	1318	FALSE	FALSE
18_v.txt	32153	32153-Deletion-G--	Deletion	1	G	-	12	21860	0.0548948	52.5833	msh2	FALSE	CAN	JSY22	3	msh2-Rep3	TGT	nope	>1bp-ins	G/C-1	none	G/C-1	CTCCATGTAAGCC	GTAAGCC	ACA	ACA	C	none	C>none	C>none_ACA	G/C-1_GTAAGCC	4	1314	FALSE	FALSE
18_v.txt	32160	32160-Deletion-A--	Deletion	1	A	-	6	21859	0.0274486	50.6667	msh2	FALSE	CAN	JSY22	3	msh2-Rep3	CAA	nope	>1bp-ins	A/T-1	none	A/T-1	TAAGCCAAAGCGC	AAAGCGC	GTT	GTT	T	none	T>none	T>none_GTT	A/T-1_AAAGCGC	4	1307	FALSE	FALSE
18_v.txt	32210	32210-Deletion-T--	Deletion	1	T	-	37	21860	0.169259	38.4595	msh2	FALSE	CAN	JSY22	3	msh2-Rep3	CTT	nope	>1bp-ins	A/T-1	none	A/T-1	ACCACCTTTGGTG	TTTGGTG	GAA	CTT	T	none	nope	nope_CTT	A/T-1_TTTGGTG	4	1257	FALSE	FALSE
18_v.txt	32381	32381-Deletion-A--	Deletion	1	A	-	13	32217	0.0403514	63.6154	msh2	FALSE	CAN	JSY22	3	msh2-Rep3	TAA	nope	>1bp-ins	A/T-1	none	A/T-1	AATAATAAAGGGA	AAAGGGA	ATT	ATT	T	none	T>none	T>none_ATT	A/T-1_AAAGGGA	4	1086	FALSE	FALSE
18_v.txt	32442	32442-Deletion-A--	Deletion	1	A	-	98	32216	0.304197	52.7449	msh2	FALSE	CAN	JSY22	3	msh2-Rep3	TAA	nope	>1bp-ins	A/T-1	none	A/T-1	GGAACTAAAAGTC	AAAAGTC	ATT	ATT	T	none	T>none	T>none_ATT	A/T-1_AAAAGTC	4	1025	FALSE	FALSE
18_v.txt	32448	32448-Deletion-C--	Deletion	1	C	-	4	32217	0.0124158	56.25	msh2	FALSE	CAN	JSY22	3	msh2-Rep3	TCC	nope	>1bp-ins	G/C-1	none	G/C-1	AAAAGTCCAATGA	CCAATGA	AGG	TCC	C	none	nope	nope_TCC	G/C-1_CCAATGA	4	1019	FALSE	FALSE
18_v.txt	32490	32490-Deletion-A--	Deletion	1	A	-	1312	32217	4.07238	44.7088	msh2	FALSE	CAN	JSY22	3	msh2-Rep3	GAA	nope	>1bp-ins	A/T-1	none	A/T-1	ATACGGAAAACAA	AAAACAA	CTT	CTT	T	none	T>none	T>none_CTT	A/T-1_AAAACAA	4	977	FALSE	FALSE
18_v.txt	32498	32498-Deletion-T--	Deletion	1	T	-	2641	32217	8.19754	44.1132	msh2	FALSE	CAN	JSY22	3	msh2-Rep3	CTT	nope	>1bp-ins	A/T-1	none	A/T-1	AACAACTTTTTTG	TTTTTTG	GAA	CTT	T	none	nope	nope_CTT	A/T-1_TTTTTTG	4	969	FALSE	FALSE
18_v.txt	32535	32535-Deletion-G--	Deletion	1	G	-	1	32217	0.003104	36	msh2	FALSE	CAN	JSY22	3	msh2-Rep3	TGC	nope	>1bp-ins	G/C-1	none	G/C-1	GGGTTTGCAGCTT	GCAGCTT	ACG	ACG	C	none	C>none	C>none_ACG	G/C-1_GCAGCTT	4	932	FALSE	FALSE
18_v.txt	32536	32536-Deletion-C--	Deletion	1	C	-	1	32217	0.003104	38	msh2	FALSE	CAN	JSY22	3	msh2-Rep3	GCA	nope	>1bp-ins	G/C-1	none	G/C-1	GGTTTGCAGCTTC	CAGCTTC	CGT	GCA	C	none	nope	nope_GCA	G/C-1_CAGCTTC	4	931	FALSE	FALSE
18_v.txt	32583	32583-Deletion-A--	Deletion	1	A	-	5	28548	0.0175144	35.8	msh2	FALSE	CAN	JSY22	3	msh2-Rep3	GAA	nope	>1bp-ins	A/T-1	none	A/T-1	AATGTGAAGGCAG	AAGGCAG	CTT	CTT	T	none	T>none	T>none_CTT	A/T-1_AAGGCAG	4	884	FALSE	FALSE
18_v.txt	32605	32605-Deletion-A--	Deletion	1	A	-	120	28548	0.420345	41.0667	msh2	FALSE	CAN	JSY22	3	msh2-Rep3	GAA	nope	>1bp-ins	A/T-1	none	A/T-1	AAGAGGAAACCCA	AAACCCA	CTT	CTT	T	none	T>none	T>none_CTT	A/T-1_AAACCCA	4	862	FALSE	FALSE
18_v.txt	32631	32631-Deletion-T--	Deletion	1	T	-	136	28548	0.476391	49.8088	msh2	FALSE	CAN	JSY22	3	msh2-Rep3	GTT	nope	>1bp-ins	A/T-1	none	A/T-1	CCTTCGTTTTTAT	TTTTTAT	CAA	GTT	T	none	nope	nope_GTT	A/T-1_TTTTTAT	4	836	FALSE	FALSE
18_v.txt	32640	32640-Deletion-T--	Deletion	1	T	-	5	28548	0.0175144	56.2	msh2	FALSE	CAN	JSY22	3	msh2-Rep3	CTT	nope	>1bp-ins	A/T-1	none	A/T-1	TTATCCTTAGATA	TTAGATA	GAA	CTT	T	none	nope	nope_CTT	A/T-1_TTAGATA	4	827	FALSE	FALSE
18_v.txt	32658	32658-Deletion-C--	Deletion	1	C	-	24	28547	0.0840719	55.1667	msh2	FALSE	CAN	JSY22	3	msh2-Rep3	ACC	nope	>1bp-ins	G/C-1	none	G/C-1	CCTGGACCCCAGG	CCCCAGG	TGG	ACC	C	none	nope	nope_ACC	G/C-1_CCCCAGG	4	809	FALSE	FALSE
18_v.txt	32670	32670-Deletion-G--	Deletion	1	G	-	13	28548	0.0455373	62.3846	msh2	FALSE	CAN	JSY22	3	msh2-Rep3	TGG	nope	>1bp-ins	G/C-1	none	G/C-1	GCACCTGGGTTTC	GGGTTTC	ACC	ACC	C	none	C>none	C>none_ACC	G/C-1_GGGTTTC	4	797	FALSE	FALSE
18_v.txt	32697	32697-Deletion-G--	Deletion	1	G	-	6	28548	0.0210172	56.6667	msh2	FALSE	CAN	JSY22	3	msh2-Rep3	TGG	nope	>1bp-ins	G/C-1	none	G/C-1	CCAACTGGGCCGG	GGGCCGG	ACC	ACC	C	none	C>none	C>none_ACC	G/C-1_GGGCCGG	4	770	FALSE	FALSE
18_v.txt	32707	32707-Deletion-C--	Deletion	1	C	-	596	28548	2.08771	62.1409	msh2	FALSE	CAN	JSY22	3	msh2-Rep3	ACC	nope	>1bp-ins	G/C-1	none	G/C-1	CGGTAACCCCAGC	CCCCAGC	TGG	ACC	C	none	nope	nope_ACC	G/C-1_CCCCAGC	4	760	FALSE	FALSE
18_v.txt	32719	32719-Deletion-A--	Deletion	1	A	-	116	28548	0.406333	62.2241	msh2	FALSE	CAN	JSY22	3	msh2-Rep3	CAA	nope	>1bp-ins	A/T-1	none	A/T-1	CACCACAAACCAT	AAACCAT	GTT	GTT	T	none	T>none	T>none_GTT	A/T-1_AAACCAT	4	748	FALSE	FALSE
18_v.txt	32728	32728-Deletion-A--	Deletion	1	A	-	989	28547	3.46446	60.2902	msh2	FALSE	CAN	JSY22	3	msh2-Rep3	CAA	nope	>1bp-ins	A/T-1	none	A/T-1	CCATACAAAAACA	AAAAACA	GTT	GTT	T	none	T>none	T>none_GTT	A/T-1_AAAAACA	4	739	FALSE	FALSE
18_v.txt	32760	32760-Deletion-A--	Deletion	1	A	-	112	28548	0.392322	51.2679	msh2	FALSE	CAN	JSY22	3	msh2-Rep3	TAA	nope	>1bp-ins	A/T-1	none	A/T-1	ATGGCTAAAACTT	AAAACTT	ATT	ATT	T	none	T>none	T>none_ATT	A/T-1_AAAACTT	4	707	FALSE	FALSE
18_v.txt	32773	32773-Deletion-A--	Deletion	1	A	-	7	28548	0.0245201	48.2857	msh2	FALSE	CAN	JSY22	3	msh2-Rep3	GAA	nope	>1bp-ins	A/T-1	none	A/T-1	TGATGGAAGCGAC	AAGCGAC	CTT	CTT	T	none	T>none	T>none_CTT	A/T-1_AAGCGAC	4	694	FALSE	FALSE
18_v.txt	32779	32779-Deletion-C--	Deletion	1	C	-	6	28548	0.0210172	50.5	msh2	FALSE	CAN	JSY22	3	msh2-Rep3	ACC	nope	>1bp-ins	G/C-1	none	G/C-1	AAGCGACCCAGAA	CCCAGAA	TGG	ACC	C	none	nope	nope_ACC	G/C-1_CCCAGAA	4	688	FALSE	FALSE
18_v.txt	32796	32796-Deletion-C--	Deletion	1	C	-	71	28548	0.248704	44.1268	msh2	FALSE	CAN	JSY22	3	msh2-Rep3	ACC	nope	>1bp-ins	G/C-1	none	G/C-1	AATTCACCGTAAT	CCGTAAT	TGG	ACC	C	none	nope	nope_ACC	G/C-1_CCGTAAT	4	671	FALSE	FALSE
18_v.txt	32839	32839-Deletion-C--	Deletion	1	C	-	6	28548	0.0210172	36.8333	msh2	FALSE	CAN	JSY22	3	msh2-Rep3	ACC	nope	>1bp-ins	G/C-1	none	G/C-1	TAATTACCCAAAA	CCCAAAA	TGG	ACC	C	none	nope	nope_ACC	G/C-1_CCCAAAA	4	628	FALSE	FALSE
18_v.txt	32842	32842-Deletion-A--	Deletion	1	A	-	2390	28548	8.37186	41.3548	msh2	FALSE	CAN	JSY22	3	msh2-Rep3	CAA	nope	>1bp-ins	A/T-1	none	A/T-1	TTACCCAAAAAAT	AAAAAAT	GTT	GTT	T	none	T>none	T>none_GTT	A/T-1_AAAAAAT	4	625	FALSE	FALSE
18_v.txt	32880	32880-Deletion-G--	Deletion	1	G	-	42	21619	0.194274	37.4524	msh2	FALSE	CAN	JSY22	3	msh2-Rep3	CGT	nope	>1bp-ins	G/C-1	none	G/C-1	TTGTACGTCCAAA	GTCCAAA	GCA	GCA	C	none	C>none	C>none_GCA	G/C-1_GTCCAAA	4	587	FALSE	FALSE
18_v.txt	32917	32917-Deletion-C--	Deletion	1	C	-	2	21619	0.009251	36.5	msh2	FALSE	CAN	JSY22	3	msh2-Rep3	TCC	nope	>1bp-ins	G/C-1	none	G/C-1	TAAGTTCCAGGGC	CCAGGGC	AGG	TCC	C	none	nope	nope_TCC	G/C-1_CCAGGGC	4	550	FALSE	FALSE
18_v.txt	32924	32924-Deletion-A--	Deletion	1	A	-	512	21619	2.36829	53.6055	msh2	FALSE	CAN	JSY22	3	msh2-Rep3	CAA	nope	>1bp-ins	A/T-1	none	A/T-1	CAGGGCAAAAGTG	AAAAGTG	GTT	GTT	T	none	T>none	T>none_GTT	A/T-1_AAAAGTG	4	543	FALSE	FALSE
18_v.txt	32935	32935-Deletion-C--	Deletion	1	C	-	7	21619	0.0323789	46.8571	msh2	FALSE	CAN	JSY22	3	msh2-Rep3	GCC	nope	>1bp-ins	G/C-1	none	G/C-1	TGATTGCCCAAGA	CCCAAGA	CGG	GCC	C	none	nope	nope_GCC	G/C-1_CCCAAGA	4	532	FALSE	FALSE
18_v.txt	32941	32941-Deletion-A--	Deletion	1	A	-	120	21619	0.555067	56.2917	msh2	FALSE	CAN	JSY22	3	msh2-Rep3	GAA	nope	>1bp-ins	A/T-1	none	A/T-1	CCCAAGAAAACCA	AAAACCA	CTT	CTT	T	none	T>none	T>none_CTT	A/T-1_AAAACCA	4	526	FALSE	FALSE
18_v.txt	32992	32992-Deletion-T--	Deletion	1	T	-	14	21619	0.0647579	55.8571	msh2	FALSE	CAN	JSY22	3	msh2-Rep3	CTT	nope	>1bp-ins	A/T-1	none	A/T-1	GGAATCTTTGTGA	TTTGTGA	GAA	CTT	T	none	nope	nope_CTT	A/T-1_TTTGTGA	4	475	FALSE	FALSE
18_v.txt	33000	33000-Deletion-A--	Deletion	1	A	-	2421	21619	11.1985	61.7699	msh2	FALSE	CAN	JSY22	3	msh2-Rep3	GAA	nope	>1bp-ins	A/T-1	none	A/T-1	TGTGAGAAAACTG	AAAACTG	CTT	CTT	T	none	T>none	T>none_CTT	A/T-1_AAAACTG	4	467	FALSE	FALSE
18_v.txt	33076	33076-Deletion-A--	Deletion	1	A	-	16	21619	0.074009	49.375	msh2	FALSE	CAN	JSY22	3	msh2-Rep3	GAA	nope	>1bp-ins	A/T-1	none	A/T-1	CCAAAGAACCCAT	AACCCAT	CTT	CTT	T	none	T>none	T>none_CTT	A/T-1_AACCCAT	4	391	FALSE	FALSE
18_v.txt	33138	33138-Deletion-A--	Deletion	1	A	-	105	21619	0.485684	39.5333	msh2	FALSE	CAN	JSY22	3	msh2-Rep3	TAA	nope	>1bp-ins	A/T-1	none	A/T-1	GTGGATAAACCAA	AAACCAA	ATT	ATT	T	none	T>none	T>none_ATT	A/T-1_AAACCAA	4	329	FALSE	FALSE
18_v.txt	33168	33168-Deletion-C--	Deletion	1	C	-	2	21620	0.009251	38	msh2	FALSE	CAN	JSY22	3	msh2-Rep3	ACC	nope	>1bp-ins	G/C-1	none	G/C-1	ATAGTACCACCAA	CCACCAA	TGG	ACC	C	none	nope	nope_ACC	G/C-1_CCACCAA	4	299	FALSE	FALSE
18_v.txt	33193	33193-Deletion-G--	Deletion	1	G	-	7	26711	0.0262064	38	msh2	FALSE	CAN	JSY22	3	msh2-Rep3	TGT	nope	>1bp-ins	G/C-1	none	G/C-1	CAATATGTCTTTG	GTCTTTG	ACA	ACA	C	none	C>none	C>none_ACA	G/C-1_GTCTTTG	4	274	FALSE	FALSE
18_v.txt	33276	33276-Deletion-G--	Deletion	1	G	-	45	26711	0.16847	49.0667	msh2	FALSE	CAN	JSY22	3	msh2-Rep3	CGT	nope	>1bp-ins	G/C-1	none	G/C-1	GAGAACGTATCCT	GTATCCT	GCA	GCA	C	none	C>none	C>none_GCA	G/C-1_GTATCCT	4	191	FALSE	FALSE
18_v.txt	33300	33300-Deletion-G--	Deletion	1	G	-	7	26711	0.0262064	63	msh2	FALSE	CAN	JSY22	3	msh2-Rep3	CGG	nope	>1bp-ins	G/C-1	none	G/C-1	CTCGTCGGGAAAG	GGGAAAG	GCC	GCC	C	none	C>none	C>none_GCC	G/C-1_GGGAAAG	4	167	FALSE	FALSE
18_v.txt	33443	33443-Deletion-G--	Deletion	1	G	-	7	26711	0.0262064	35.1429	msh2	FALSE	CAN	JSY22	3	msh2-Rep3	CGG	nope	>1bp-ins	G/C-1	none	G/C-1	TATGTCGGCGTCT	GGCGTCT	GCC	GCC	C	none	C>none	C>none_GCC	G/C-1_GGCGTCT	4	24	FALSE	FALSE
18_v.txt	33474	33474-Deletion-C--	Deletion	1	C	-	60	26711	0.224627	27.5833	msh2	FALSE	CAN	JSY22	3	msh2-Rep3	GCC	nope	>1bp-ins	G/C-1	none	G/C-1	GCTATGCCTTTTT	CCTTTTT	CGG	GCC	C	none	nope	nope_GCC	G/C-1_CCTTTTT	4	N_A	FALSE	FALSE
19_v.txt	32004	32004-SNV-A-C	SNV	1	A	C	16	21220	0.0754006	39.75	msh2	FALSE	CAN	JSY22	4	msh2-Rep4	TAA	A>C	G/C+1	A/T-1	TA>GC	TA>GC	AATGGTAACTCGT	AACTCGT	ATT	ATT	T	G	T>G	T>G_ATT	TA>GC_AACTCGT	4	1463	FALSE	FALSE
19_v.txt	32109	32109-SNV-A-C	SNV	1	A	C	61	21220	0.287465	59.8033	msh2	FALSE	CAN	JSY22	4	msh2-Rep4	TAA	A>C	G/C+1	A/T-1	TA>GC	TA>GC	ATATTTAATAGCC	AATAGCC	ATT	ATT	T	G	T>G	T>G_ATT	TA>GC_AATAGCC	4	1358	FALSE	FALSE
19_v.txt	32728	32728-SNV-A-C	SNV	1	A	C	7	24894	0.0281192	15.7143	msh2	FALSE	CAN	JSY22	4	msh2-Rep4	CAA	A>C	G/C+1	A/T-1	TA>GC	TA>GC	CCATACAAAAACA	AAAAACA	GTT	GTT	T	G	T>G	T>G_GTT	TA>GC_AAAAACA	4	739	FALSE	FALSE
19_v.txt	32842	32842-SNV-A-C	SNV	1	A	C	4	24896	0.0160668	37.4998	msh2	FALSE	CAN	JSY22	4	msh2-Rep4	CAA	A>C	G/C+1	A/T-1	TA>GC	TA>GC	TTACCCAAAAAAT	AAAAAAT	GTT	GTT	T	G	T>G	T>G_GTT	TA>GC_AAAAAAT	4	625	FALSE	FALSE
19_v.txt	32913	32913-SNV-A-C	SNV	1	A	C	105	27802	0.377671	43.8476	msh2	FALSE	CAN	JSY22	4	msh2-Rep4	AAG	A>C	G/C+1	A/T-1	TA>GC	TA>GC	ACACTAAGTTCCA	AGTTCCA	TTC	TTC	T	G	T>G	T>G_TTC	TA>GC_AGTTCCA	4	554	FALSE	FALSE
19_v.txt	32919	32919-SNV-A-C	SNV	1	A	C	32	27802	0.1151	45.0625	msh2	FALSE	CAN	JSY22	4	msh2-Rep4	CAG	A>C	G/C+1	A/T-1	TA>GC	TA>GC	AGTTCCAGGGCAA	AGGGCAA	GTC	GTC	T	G	T>G	T>G_GTC	TA>GC_AGGGCAA	4	548	FALSE	FALSE
19_v.txt	33084	33084-SNV-A-C	SNV	1	A	C	4	27802	0.0143875	17.5013	msh2	FALSE	CAN	JSY22	4	msh2-Rep4	AAA	A>C	G/C+1	A/T-1	TA>GC	TA>GC	CCCATAAATAAAT	AATAAAT	TTT	TTT	T	G	T>G	T>G_TTT	TA>GC_AATAAAT	4	383	FALSE	FALSE
19_v.txt	33099	33099-SNV-A-C	SNV	1	A	C	20	27802	0.0719373	43.1	msh2	FALSE	CAN	JSY22	4	msh2-Rep4	AAG	A>C	G/C+1	A/T-1	TA>GC	TA>GC	GATATAAGAGCGC	AGAGCGC	TTC	TTC	T	G	T>G	T>G_TTC	TA>GC_AGAGCGC	4	368	FALSE	FALSE
19_v.txt	33204	33204-SNV-A-C	SNV	1	A	C	380	25492	1.49066	37.4384	msh2	FALSE	CAN	JSY22	4	msh2-Rep4	AAG	A>C	G/C+1	A/T-1	TA>GC	TA>GC	TGCTTAAGCTCTC	AGCTCTC	TTC	TTC	T	G	T>G	T>G_TTC	TA>GC_AGCTCTC	4	263	FALSE	FALSE
19_v.txt	33207	33207-SNV-T-G	SNV	1	T	G	6	25492	0.0235368	18.5005	msh2	FALSE	CAN	JSY22	4	msh2-Rep4	CTC	T>G	G/C+1	A/T-1	TA>GC	TA>GC	TTAAGCTCTCTCT	TCTCTCT	GAG	CTC	T	C	T>G	T>G_CTC	TA>GC_TCTCTCT	4	260	FALSE	FALSE
19_v.txt	33269	33269-SNV-A-C	SNV	1	A	C	181	25492	0.710027	15.3702	msh2	FALSE	CAN	JSY22	4	msh2-Rep4	TAG	A>C	G/C+1	A/T-1	TA>GC	TA>GC	CTCCATAGAGAAC	AGAGAAC	ATC	ATC	T	G	T>G	T>G_ATC	TA>GC_AGAGAAC	4	198	FALSE	FALSE
19_v.txt	33476	33476-SNV-T-G	SNV	1	T	G	6	25489	0.0235396	37.3333	msh2	FALSE	CAN	JSY22	4	msh2-Rep4	CTT	T>G	G/C+1	A/T-1	TA>GC	TA>GC	TATGCCTTTTTTT	TTTTTTT	GAA	CTT	T	C	T>G	T>G_CTT	TA>GC_TTTTTTT	4	N_A	FALSE	FALSE
19_v.txt	32055	32055-SNV-T-C	SNV	1	T	C	30	21220	0.141376	58.5333	msh2	FALSE	CAN	JSY22	4	msh2-Rep4	GTG	T>C	G/C+1	A/T-1	TA>CG	TA>CG	CTGATGTGCGAGA	TGCGAGA	CAC	GTG	T	G	T>C	T>C_GTG	TA>CG_TGCGAGA	4	1412	FALSE	FALSE
19_v.txt	32077	32077-SNV-A-G	SNV	1	A	G	22	21220	0.103676	58.0909	msh2	FALSE	CAN	JSY22	4	msh2-Rep4	CAT	A>G	G/C+1	A/T-1	TA>CG	TA>CG	ATAACCATGCAAA	ATGCAAA	GTA	GTA	T	C	T>C	T>C_GTA	TA>CG_ATGCAAA	4	1390	FALSE	FALSE
19_v.txt	32081	32081-SNV-A-G	SNV	1	A	G	6	21220	0.0282752	53.3334	msh2	FALSE	CAN	JSY22	4	msh2-Rep4	CAA	A>G	G/C+1	A/T-1	TA>CG	TA>CG	CCATGCAAAAAAG	AAAAAAG	GTT	GTT	T	C	T>C	T>C_GTT	TA>CG_AAAAAAG	4	1386	FALSE	FALSE
19_v.txt	32224	32224-SNV-A-G	SNV	1	A	G	21	21220	0.0989632	35.2857	msh2	FALSE	CAN	JSY22	4	msh2-Rep4	GAC	A>G	G/C+1	A/T-1	TA>CG	TA>CG	TCCTTGACAGGAA	ACAGGAA	CTG	CTG	T	C	T>C	T>C_CTG	TA>CG_ACAGGAA	4	1243	FALSE	FALSE
19_v.txt	32293	32293-SNV-A-G	SNV	1	A	G	30	24044	0.124771	54.0333	msh2	FALSE	CAN	JSY22	4	msh2-Rep4	GAA	A>G	G/C+1	A/T-1	TA>CG	TA>CG	TATTTGAATTTGC	AATTTGC	CTT	CTT	T	C	T>C	T>C_CTT	TA>CG_AATTTGC	4	1174	FALSE	FALSE
19_v.txt	32346	32346-SNV-A-G	SNV	1	A	G	6	24044	0.0249543	60.8298	msh2	FALSE	CAN	JSY22	4	msh2-Rep4	CAA	A>G	G/C+1	A/T-1	TA>CG	TA>CG	TGTGGCAAAACCT	AAAACCT	GTT	GTT	T	C	T>C	T>C_GTT	TA>CG_AAAACCT	4	1121	FALSE	FALSE
19_v.txt	32490	32490-SNV-A-G	SNV	1	A	G	20	24044	0.0831808	44.35	msh2	FALSE	CAN	JSY22	4	msh2-Rep4	GAA	A>G	G/C+1	A/T-1	TA>CG	TA>CG	ATACGGAAAACAA	AAAACAA	CTT	CTT	T	C	T>C	T>C_CTT	TA>CG_AAAACAA	4	977	FALSE	FALSE
19_v.txt	32574	32574-SNV-T-C	SNV	1	T	C	24	24896	0.096401	36.0833	msh2	FALSE	CAN	JSY22	4	msh2-Rep4	TTG	T>C	G/C+1	A/T-1	TA>CG	TA>CG	GTACCTTGAAATG	TGAAATG	AAC	TTG	T	G	T>C	T>C_TTG	TA>CG_TGAAATG	4	893	FALSE	FALSE
19_v.txt	32583	32583-SNV-A-G	SNV	1	A	G	20	24896	0.0803342	34.35	msh2	FALSE	CAN	JSY22	4	msh2-Rep4	GAA	A>G	G/C+1	A/T-1	TA>CG	TA>CG	AATGTGAAGGCAG	AAGGCAG	CTT	CTT	T	C	T>C	T>C_CTT	TA>CG_AAGGCAG	4	884	FALSE	FALSE
19_v.txt	32631	32631-SNV-T-C	SNV	1	T	C	4	24896	0.0160668	36.75	msh2	FALSE	CAN	JSY22	4	msh2-Rep4	GTT	T>C	G/C+1	A/T-1	TA>CG	TA>CG	CCTTCGTTTTTAT	TTTTTAT	CAA	GTT	T	G	T>C	T>C_GTT	TA>CG_TTTTTAT	4	836	FALSE	FALSE
19_v.txt	32728	32728-SNV-A-G	SNV	1	A	G	8	24894	0.0321363	47.75	msh2	FALSE	CAN	JSY22	4	msh2-Rep4	CAA	A>G	G/C+1	A/T-1	TA>CG	TA>CG	CCATACAAAAACA	AAAAACA	GTT	GTT	T	C	T>C	T>C_GTT	TA>CG_AAAAACA	4	739	FALSE	FALSE
19_v.txt	32734	32734-SNV-A-G	SNV	1	A	G	43	24896	0.172719	54.5814	msh2	FALSE	CAN	JSY22	4	msh2-Rep4	CAG	A>G	G/C+1	A/T-1	TA>CG	TA>CG	AAAAACAGTATAT	AGTATAT	GTC	GTC	T	C	T>C	T>C_GTC	TA>CG_AGTATAT	4	733	FALSE	FALSE
19_v.txt	32919	32919-SNV-A-G	SNV	1	A	G	14	27802	0.0503561	46.0714	msh2	FALSE	CAN	JSY22	4	msh2-Rep4	CAG	A>G	G/C+1	A/T-1	TA>CG	TA>CG	AGTTCCAGGGCAA	AGGGCAA	GTC	GTC	T	C	T>C	T>C_GTC	TA>CG_AGGGCAA	4	548	FALSE	FALSE
19_v.txt	32941	32941-SNV-A-G	SNV	1	A	G	5	27802	0.0179843	57.1898	msh2	FALSE	CAN	JSY22	4	msh2-Rep4	GAA	A>G	G/C+1	A/T-1	TA>CG	TA>CG	CCCAAGAAAACCA	AAAACCA	CTT	CTT	T	C	T>C	T>C_CTT	TA>CG_AAAACCA	4	526	FALSE	FALSE
19_v.txt	33083	33083-SNV-A-G	SNV	1	A	G	6	27802	0.0215812	30.5	msh2	FALSE	CAN	JSY22	4	msh2-Rep4	TAA	A>G	G/C+1	A/T-1	TA>CG	TA>CG	ACCCATAAATAAA	AAATAAA	ATT	ATT	T	C	T>C	T>C_ATT	TA>CG_AAATAAA	4	384	FALSE	FALSE
19_v.txt	33094	33094-SNV-A-G	SNV	1	A	G	3	27802	0.0107906	58.9999	msh2	FALSE	CAN	JSY22	4	msh2-Rep4	GAT	A>G	G/C+1	A/T-1	TA>CG	TA>CG	AATATGATATAAG	ATATAAG	CTA	CTA	T	C	T>C	T>C_CTA	TA>CG_ATATAAG	4	373	FALSE	FALSE
19_v.txt	33204	33204-SNV-A-G	SNV	1	A	G	5	25492	0.019614	30.7993	msh2	FALSE	CAN	JSY22	4	msh2-Rep4	AAG	A>G	G/C+1	A/T-1	TA>CG	TA>CG	TGCTTAAGCTCTC	AGCTCTC	TTC	TTC	T	C	T>C	T>C_TTC	TA>CG_AGCTCTC	4	263	FALSE	FALSE
19_v.txt	33476	33476-SNV-T-C	SNV	1	T	C	34	25489	0.133391	31.8824	msh2	FALSE	CAN	JSY22	4	msh2-Rep4	CTT	T>C	G/C+1	A/T-1	TA>CG	TA>CG	TATGCCTTTTTTT	TTTTTTT	GAA	CTT	T	G	T>C	T>C_CTT	TA>CG_TTTTTTT	4	N_A	FALSE	FALSE
19_v.txt	32337	32337-SNV-A-T	SNV	1	A	T	4	24044	0.0166362	35.2498	msh2	FALSE	CAN	JSY22	4	msh2-Rep4	GAT	A>T	A/T+1	A/T-1	TA>AT	TA>AT	TTGAAGATATGTG	ATATGTG	CTA	CTA	T	A	T>A	T>A_CTA	TA>AT_ATATGTG	4	1130	FALSE	FALSE
19_v.txt	32498	32498-SNV-T-A	SNV	1	T	A	4	24044	0.0166362	44.4949	msh2	FALSE	CAN	JSY22	4	msh2-Rep4	CTT	T>A	A/T+1	A/T-1	TA>AT	TA>AT	AACAACTTTTTTG	TTTTTTG	GAA	CTT	T	T	T>A	T>A_CTT	TA>AT_TTTTTTG	4	969	FALSE	FALSE
19_v.txt	32631	32631-SNV-T-A	SNV	1	T	A	1	24896	0.004017	37.9999	msh2	FALSE	CAN	JSY22	4	msh2-Rep4	GTT	T>A	A/T+1	A/T-1	TA>AT	TA>AT	CCTTCGTTTTTAT	TTTTTAT	CAA	GTT	T	T	T>A	T>A_GTT	TA>AT_TTTTTAT	4	836	FALSE	FALSE
19_v.txt	33082	33082-SNV-T-A	SNV	1	T	A	7	27802	0.025178	44.5673	msh2	FALSE	CAN	JSY22	4	msh2-Rep4	ATA	T>A	A/T+1	A/T-1	TA>AT	TA>AT	AACCCATAAATAA	TAAATAA	TAT	ATA	T	T	T>A	T>A_ATA	TA>AT_TAAATAA	4	385	FALSE	FALSE
19_v.txt	33094	33094-SNV-A-T	SNV	1	A	T	3	27802	0.0107906	25.6666	msh2	FALSE	CAN	JSY22	4	msh2-Rep4	GAT	A>T	A/T+1	A/T-1	TA>AT	TA>AT	AATATGATATAAG	ATATAAG	CTA	CTA	T	A	T>A	T>A_CTA	TA>AT_ATATAAG	4	373	FALSE	FALSE
19_v.txt	33095	33095-SNV-T-A	SNV	1	T	A	6	27802	0.0215812	42.1654	msh2	FALSE	CAN	JSY22	4	msh2-Rep4	ATA	T>A	A/T+1	A/T-1	TA>AT	TA>AT	ATATGATATAAGA	TATAAGA	TAT	ATA	T	T	T>A	T>A_ATA	TA>AT_TATAAGA	4	372	FALSE	FALSE
19_v.txt	31882	31882-SNV-C-T	SNV	1	C	T	10	6119	0.163425	40.2	msh2	FALSE	CAN	JSY22	4	msh2-Rep4	GCA	C>T	A/T+1	G/C-1	CG>TA	CG>TA	AGGCGGCAGCAAA	CAGCAAA	CGT	GCA	C	A	C>T	C>T_GCA	CG>TA_CAGCAAA	4	1585	FALSE	FALSE
19_v.txt	31962	31962-SNV-G-A	SNV	1	G	A	29	21220	0.136664	35.6207	msh2	FALSE	CAN	JSY22	4	msh2-Rep4	CGC	G>A	A/T+1	G/C-1	CG>TA	CG>TA	GTGGCCGCATAAT	GCATAAT	GCG	GCG	C	T	C>T	C>T_GCG	CG>TA_GCATAAT	4	1505	FALSE	FALSE
19_v.txt	31977	31977-SNV-C-T	SNV	1	C	T	23	21220	0.108388	44.8696	msh2	FALSE	CAN	JSY22	4	msh2-Rep4	GCC	C>T	A/T+1	G/C-1	CG>TA	CG>TA	GCCAAGCCGGGCA	CCGGGCA	CGG	GCC	C	A	C>T	C>T_GCC	CG>TA_CCGGGCA	4	1490	FALSE	FALSE
19_v.txt	31981	31981-SNV-G-A	SNV	1	G	A	31	21220	0.146089	55.4194	msh2	FALSE	CAN	JSY22	4	msh2-Rep4	GGC	G>A	A/T+1	G/C-1	CG>TA	CG>TA	AGCCGGGCATTAA	GCATTAA	CCG	CCG	C	T	C>T	C>T_CCG	CG>TA_GCATTAA	4	1486	FALSE	FALSE
19_v.txt	32057	32057-SNV-C-T	SNV	1	C	T	22	21220	0.103676	62.9091	msh2	FALSE	CAN	JSY22	4	msh2-Rep4	GCG	C>T	A/T+1	G/C-1	CG>TA	CG>TA	GATGTGCGAGATT	CGAGATT	CGC	GCG	C	A	C>T	C>T_GCG	CG>TA_CGAGATT	4	1410	FALSE	FALSE
19_v.txt	32075	32075-SNV-C-T	SNV	1	C	T	88	21220	0.414703	62.5414	msh2	FALSE	CAN	JSY22	4	msh2-Rep4	ACC	C>T	A/T+1	G/C-1	CG>TA	CG>TA	AAATAACCATGCA	CCATGCA	TGG	ACC	C	A	C>T	C>T_ACC	CG>TA_CCATGCA	4	1392	FALSE	FALSE
19_v.txt	32076	32076-SNV-C-T	SNV	1	C	T	30	21220	0.141376	61.2333	msh2	FALSE	CAN	JSY22	4	msh2-Rep4	CCA	C>T	A/T+1	G/C-1	CG>TA	CG>TA	AATAACCATGCAA	CATGCAA	GGT	CCA	C	A	C>T	C>T_CCA	CG>TA_CATGCAA	4	1391	FALSE	FALSE
19_v.txt	32088	32088-SNV-C-T	SNV	1	C	T	89	21219	0.419435	60.7079	msh2	FALSE	CAN	JSY22	4	msh2-Rep4	GCC	C>T	A/T+1	G/C-1	CG>TA	CG>TA	AAAAAGCCTGCAA	CCTGCAA	CGG	GCC	C	A	C>T	C>T_GCC	CG>TA_CCTGCAA	4	1379	FALSE	FALSE
19_v.txt	32089	32089-SNV-C-T	SNV	1	C	T	13	21219	0.0612658	64	msh2	FALSE	CAN	JSY22	4	msh2-Rep4	CCT	C>T	A/T+1	G/C-1	CG>TA	CG>TA	AAAAGCCTGCAAC	CTGCAAC	GGA	CCT	C	A	C>T	C>T_CCT	CG>TA_CTGCAAC	4	1378	FALSE	FALSE
19_v.txt	32092	32092-SNV-C-T	SNV	1	C	T	22	21220	0.103676	58.6818	msh2	FALSE	CAN	JSY22	4	msh2-Rep4	GCA	C>T	A/T+1	G/C-1	CG>TA	CG>TA	AGCCTGCAACACC	CAACACC	CGT	GCA	C	A	C>T	C>T_GCA	CG>TA_CAACACC	4	1375	FALSE	FALSE
19_v.txt	32114	32114-SNV-C-T	SNV	1	C	T	36	21220	0.169651	60.3889	msh2	FALSE	CAN	JSY22	4	msh2-Rep4	GCC	C>T	A/T+1	G/C-1	CG>TA	CG>TA	TAATAGCCATTCG	CCATTCG	CGG	GCC	C	A	C>T	C>T_GCC	CG>TA_CCATTCG	4	1353	FALSE	FALSE
19_v.txt	32165	32165-SNV-G-A	SNV	1	G	A	19	21220	0.0895382	48.6309	msh2	FALSE	CAN	JSY22	4	msh2-Rep4	CGC	G>A	A/T+1	G/C-1	CG>TA	CG>TA	CAAAGCGCCAAAT	GCCAAAT	GCG	GCG	C	T	C>T	C>T_GCG	CG>TA_GCCAAAT	4	1302	FALSE	FALSE
19_v.txt	32166	32166-SNV-C-T	SNV	1	C	T	169	21220	0.796418	46.2353	msh2	FALSE	CAN	JSY22	4	msh2-Rep4	GCC	C>T	A/T+1	G/C-1	CG>TA	CG>TA	AAAGCGCCAAATG	CCAAATG	CGG	GCC	C	A	C>T	C>T_GCC	CG>TA_CCAAATG	4	1301	FALSE	FALSE
19_v.txt	32271	32271-SNV-C-T	SNV	1	C	T	70	24044	0.291133	34.4714	msh2	FALSE	CAN	JSY22	4	msh2-Rep4	ACG	C>T	A/T+1	G/C-1	CG>TA	CG>TA	AAAATACGGGAAC	CGGGAAC	TGC	ACG	C	A	C>T	C>T_ACG	CG>TA_CGGGAAC	4	1196	FALSE	FALSE
19_v.txt	32274	32274-SNV-G-A	SNV	1	G	A	35	24044	0.145566	36.5429	msh2	FALSE	CAN	JSY22	4	msh2-Rep4	GGA	G>A	A/T+1	G/C-1	CG>TA	CG>TA	ATACGGGAACCAA	GAACCAA	CCT	CCT	C	T	C>T	C>T_CCT	CG>TA_GAACCAA	4	1193	FALSE	FALSE
19_v.txt	32299	32299-SNV-C-T	SNV	1	C	T	37	24044	0.153885	53.2973	msh2	FALSE	CAN	JSY22	4	msh2-Rep4	GCG	C>T	A/T+1	G/C-1	CG>TA	CG>TA	AATTTGCGGCAGA	CGGCAGA	CGC	GCG	C	A	C>T	C>T_GCG	CG>TA_CGGCAGA	4	1168	FALSE	FALSE
19_v.txt	32449	32449-SNV-C-T	SNV	1	C	T	58	24044	0.241224	55.3276	msh2	FALSE	CAN	JSY22	4	msh2-Rep4	CCA	C>T	A/T+1	G/C-1	CG>TA	CG>TA	AAAGTCCAATGAA	CAATGAA	GGT	CCA	C	A	C>T	C>T_CCA	CG>TA_CAATGAA	4	1018	FALSE	FALSE
19_v.txt	32466	32466-SNV-C-T	SNV	1	C	T	31	24044	0.12893	43.3548	msh2	FALSE	CAN	JSY22	4	msh2-Rep4	GCC	C>T	A/T+1	G/C-1	CG>TA	CG>TA	AGAGAGCCAATGT	CCAATGT	CGG	GCC	C	A	C>T	C>T_GCC	CG>TA_CCAATGT	4	1001	FALSE	FALSE
19_v.txt	32487	32487-SNV-C-T	SNV	1	C	T	93	24044	0.386791	43.0103	msh2	FALSE	CAN	JSY22	4	msh2-Rep4	ACG	C>T	A/T+1	G/C-1	CG>TA	CG>TA	AAGATACGGAAAA	CGGAAAA	TGC	ACG	C	A	C>T	C>T_ACG	CG>TA_CGGAAAA	4	980	FALSE	FALSE
19_v.txt	32508	32508-SNV-G-A	SNV	1	G	A	32	24044	0.133089	42.9375	msh2	FALSE	CAN	JSY22	4	msh2-Rep4	GGC	G>A	A/T+1	G/C-1	CG>TA	CG>TA	TTGATGGCTCTTG	GCTCTTG	CCG	CCG	C	T	C>T	C>T_CCG	CG>TA_GCTCTTG	4	959	FALSE	FALSE
19_v.txt	32535	32535-SNV-G-A	SNV	1	G	A	24	24043	0.0998212	35.6662	msh2	FALSE	CAN	JSY22	4	msh2-Rep4	TGC	G>A	A/T+1	G/C-1	CG>TA	CG>TA	GGGTTTGCAGCTT	GCAGCTT	ACG	ACG	C	T	C>T	C>T_ACG	CG>TA_GCAGCTT	4	932	FALSE	FALSE
19_v.txt	32536	32536-SNV-C-T	SNV	1	C	T	33	24043	0.137254	36.3031	msh2	FALSE	CAN	JSY22	4	msh2-Rep4	GCA	C>T	A/T+1	G/C-1	CG>TA	CG>TA	GGTTTGCAGCTTC	CAGCTTC	CGT	GCA	C	A	C>T	C>T_GCA	CG>TA_CAGCTTC	4	931	FALSE	FALSE
19_v.txt	32590	32590-SNV-C-T	SNV	1	C	T	33	24896	0.132551	35.6667	msh2	FALSE	CAN	JSY22	4	msh2-Rep4	GCG	C>T	A/T+1	G/C-1	CG>TA	CG>TA	AGGCAGCGTTAAT	CGTTAAT	CGC	GCG	C	A	C>T	C>T_GCG	CG>TA_CGTTAAT	4	877	FALSE	FALSE
19_v.txt	32609	32609-SNV-C-T	SNV	1	C	T	37	24896	0.148618	49.2162	msh2	FALSE	CAN	JSY22	4	msh2-Rep4	CCC	C>T	A/T+1	G/C-1	CG>TA	CG>TA	GGAAACCCAACCT	CCAACCT	GGG	CCC	C	A	C>T	C>T_CCC	CG>TA_CCAACCT	4	858	FALSE	FALSE
19_v.txt	32658	32658-SNV-C-T	SNV	1	C	T	11	24896	0.0441838	49.7227	msh2	FALSE	CAN	JSY22	4	msh2-Rep4	ACC	C>T	A/T+1	G/C-1	CG>TA	CG>TA	CCTGGACCCCAGG	CCCCAGG	TGG	ACC	C	A	C>T	C>T_ACC	CG>TA_CCCCAGG	4	809	FALSE	FALSE
19_v.txt	32660	32660-SNV-C-T	SNV	1	C	T	33	24895	0.132557	57.8788	msh2	FALSE	CAN	JSY22	4	msh2-Rep4	CCC	C>T	A/T+1	G/C-1	CG>TA	CG>TA	TGGACCCCAGGCA	CCAGGCA	GGG	CCC	C	A	C>T	C>T_CCC	CG>TA_CCAGGCA	4	807	FALSE	FALSE
19_v.txt	32661	32661-SNV-C-T	SNV	1	C	T	35	24896	0.140585	57.4789	msh2	FALSE	CAN	JSY22	4	msh2-Rep4	CCA	C>T	A/T+1	G/C-1	CG>TA	CG>TA	GGACCCCAGGCAC	CAGGCAC	GGT	CCA	C	A	C>T	C>T_CCA	CG>TA_CAGGCAC	4	806	FALSE	FALSE
19_v.txt	32678	32678-SNV-C-T	SNV	1	C	T	142	24896	0.570373	59.669	msh2	FALSE	CAN	JSY22	4	msh2-Rep4	TCC	C>T	A/T+1	G/C-1	CG>TA	CG>TA	GTTTCTCCAATAA	CCAATAA	AGG	TCC	C	A	C>T	C>T_TCC	CG>TA_CCAATAA	4	789	FALSE	FALSE
19_v.txt	32700	32700-SNV-C-T	SNV	1	C	T	30	24896	0.120501	58.6667	msh2	FALSE	CAN	JSY22	4	msh2-Rep4	GCC	C>T	A/T+1	G/C-1	CG>TA	CG>TA	ACTGGGCCGGTAA	CCGGTAA	CGG	GCC	C	A	C>T	C>T_GCC	CG>TA_CCGGTAA	4	767	FALSE	FALSE
19_v.txt	32776	32776-SNV-C-T	SNV	1	C	T	23	24896	0.0923843	52.6087	msh2	FALSE	CAN	JSY22	4	msh2-Rep4	GCG	C>T	A/T+1	G/C-1	CG>TA	CG>TA	TGGAAGCGACCCA	CGACCCA	CGC	GCG	C	A	C>T	C>T_GCG	CG>TA_CGACCCA	4	691	FALSE	FALSE
19_v.txt	32796	32796-SNV-C-T	SNV	1	C	T	59	24896	0.236986	46.5066	msh2	FALSE	CAN	JSY22	4	msh2-Rep4	ACC	C>T	A/T+1	G/C-1	CG>TA	CG>TA	AATTCACCGTAAT	CCGTAAT	TGG	ACC	C	A	C>T	C>T_ACC	CG>TA_CCGTAAT	4	671	FALSE	FALSE
19_v.txt	32797	32797-SNV-C-T	SNV	1	C	T	85	24896	0.34142	47.7508	msh2	FALSE	CAN	JSY22	4	msh2-Rep4	CCG	C>T	A/T+1	G/C-1	CG>TA	CG>TA	ATTCACCGTAATA	CGTAATA	GGC	CCG	C	A	C>T	C>T_CCG	CG>TA_CGTAATA	4	670	FALSE	FALSE
19_v.txt	32798	32798-SNV-G-A	SNV	1	G	A	39	24896	0.156652	42.3141	msh2	FALSE	CAN	JSY22	4	msh2-Rep4	CGT	G>A	A/T+1	G/C-1	CG>TA	CG>TA	TTCACCGTAATAT	GTAATAT	GCA	GCA	C	T	C>T	C>T_GCA	CG>TA_GTAATAT	4	669	FALSE	FALSE
19_v.txt	32811	32811-SNV-G-A	SNV	1	G	A	22	24896	0.0883676	46.0909	msh2	FALSE	CAN	JSY22	4	msh2-Rep4	AGG	G>A	A/T+1	G/C-1	CG>TA	CG>TA	TTGACAGGGAACA	GGGAACA	TCC	TCC	C	T	C>T	C>T_TCC	CG>TA_GGGAACA	4	656	FALSE	FALSE
19_v.txt	32840	32840-SNV-C-T	SNV	1	C	T	29	24896	0.116485	40.3103	msh2	FALSE	CAN	JSY22	4	msh2-Rep4	CCC	C>T	A/T+1	G/C-1	CG>TA	CG>TA	AATTACCCAAAAA	CCAAAAA	GGG	CCC	C	A	C>T	C>T_CCC	CG>TA_CCAAAAA	4	627	FALSE	FALSE
19_v.txt	32841	32841-SNV-C-T	SNV	1	C	T	50	24896	0.200835	42.2	msh2	FALSE	CAN	JSY22	4	msh2-Rep4	CCA	C>T	A/T+1	G/C-1	CG>TA	CG>TA	ATTACCCAAAAAA	CAAAAAA	GGT	CCA	C	A	C>T	C>T_CCA	CG>TA_CAAAAAA	4	626	FALSE	FALSE
19_v.txt	32855	32855-SNV-C-T	SNV	1	C	T	109	24896	0.437821	37.0642	msh2	FALSE	CAN	JSY22	4	msh2-Rep4	TCC	C>T	A/T+1	G/C-1	CG>TA	CG>TA	ACTAATCCATGCC	CCATGCC	AGG	TCC	C	A	C>T	C>T_TCC	CG>TA_CCATGCC	4	612	FALSE	FALSE
19_v.txt	32860	32860-SNV-C-T	SNV	1	C	T	19	24895	0.0763205	37.1053	msh2	FALSE	CAN	JSY22	4	msh2-Rep4	GCC	C>T	A/T+1	G/C-1	CG>TA	CG>TA	TCCATGCCGCCAG	CCGCCAG	CGG	GCC	C	A	C>T	C>T_GCC	CG>TA_CCGCCAG	4	607	FALSE	FALSE
19_v.txt	32901	32901-SNV-C-T	SNV	1	C	T	68	27802	0.244587	31.6471	msh2	FALSE	CAN	JSY22	4	msh2-Rep4	GCC	C>T	A/T+1	G/C-1	CG>TA	CG>TA	ACTTGGCCAACTA	CCAACTA	CGG	GCC	C	A	C>T	C>T_GCC	CG>TA_CCAACTA	4	566	FALSE	FALSE
19_v.txt	32917	32917-SNV-C-T	SNV	1	C	T	34	27802	0.122293	43.0882	msh2	FALSE	CAN	JSY22	4	msh2-Rep4	TCC	C>T	A/T+1	G/C-1	CG>TA	CG>TA	TAAGTTCCAGGGC	CCAGGGC	AGG	TCC	C	A	C>T	C>T_TCC	CG>TA_CCAGGGC	4	550	FALSE	FALSE
19_v.txt	32945	32945-SNV-C-T	SNV	1	C	T	228	27802	0.820085	58.2662	msh2	FALSE	CAN	JSY22	4	msh2-Rep4	ACC	C>T	A/T+1	G/C-1	CG>TA	CG>TA	AGAAAACCAATAC	CCAATAC	TGG	ACC	C	A	C>T	C>T_ACC	CG>TA_CCAATAC	4	522	FALSE	FALSE
19_v.txt	32946	32946-SNV-C-T	SNV	1	C	T	25	27802	0.0899216	53.838	msh2	FALSE	CAN	JSY22	4	msh2-Rep4	CCA	C>T	A/T+1	G/C-1	CG>TA	CG>TA	GAAAACCAATACA	CAATACA	GGT	CCA	C	A	C>T	C>T_CCA	CG>TA_CAATACA	4	521	FALSE	FALSE
19_v.txt	32958	32958-SNV-C-T	SNV	1	C	T	31	27802	0.111503	45.2581	msh2	FALSE	CAN	JSY22	4	msh2-Rep4	ACC	C>T	A/T+1	G/C-1	CG>TA	CG>TA	ATGTAACCATTGG	CCATTGG	TGG	ACC	C	A	C>T	C>T_ACC	CG>TA_CCATTGG	4	509	FALSE	FALSE
19_v.txt	32967	32967-SNV-G-A	SNV	1	G	A	64	27802	0.230199	59.8281	msh2	FALSE	CAN	JSY22	4	msh2-Rep4	CGC	G>A	A/T+1	G/C-1	CG>TA	CG>TA	TTGGCCGCACCAA	GCACCAA	GCG	GCG	C	T	C>T	C>T_GCG	CG>TA_GCACCAA	4	500	FALSE	FALSE
19_v.txt	32970	32970-SNV-C-T	SNV	1	C	T	301	27802	1.08266	58.8405	msh2	FALSE	CAN	JSY22	4	msh2-Rep4	ACC	C>T	A/T+1	G/C-1	CG>TA	CG>TA	GCCGCACCAAATG	CCAAATG	TGG	ACC	C	A	C>T	C>T_ACC	CG>TA_CCAAATG	4	497	FALSE	FALSE
19_v.txt	32995	32995-SNV-G-A	SNV	1	G	A	136	27802	0.489173	61.9632	msh2	FALSE	CAN	JSY22	4	msh2-Rep4	TGT	G>A	A/T+1	G/C-1	CG>TA	CG>TA	ATCTTTGTGAGAA	GTGAGAA	ACA	ACA	C	T	C>T	C>T_ACA	CG>TA_GTGAGAA	4	472	FALSE	FALSE
19_v.txt	33056	33056-SNV-C-T	SNV	1	C	T	37	27802	0.133084	56.973	msh2	FALSE	CAN	JSY22	4	msh2-Rep4	GCG	C>T	A/T+1	G/C-1	CG>TA	CG>TA	GGACTGCGTGACA	CGTGACA	CGC	GCG	C	A	C>T	C>T_GCG	CG>TA_CGTGACA	4	411	FALSE	FALSE
19_v.txt	33070	33070-SNV-C-T	SNV	1	C	T	26	27802	0.0935185	50.8077	msh2	FALSE	CAN	JSY22	4	msh2-Rep4	GCC	C>T	A/T+1	G/C-1	CG>TA	CG>TA	AATATGCCAAAGA	CCAAAGA	CGG	GCC	C	A	C>T	C>T_GCC	CG>TA_CCAAAGA	4	397	FALSE	FALSE
19_v.txt	33113	33113-SNV-G-A	SNV	1	G	A	19	27802	0.0683404	43.5042	msh2	FALSE	CAN	JSY22	4	msh2-Rep4	GGC	G>A	A/T+1	G/C-1	CG>TA	CG>TA	CACTGGGCCGGCG	GCCGGCG	CCG	CCG	C	T	C>T	C>T_CCG	CG>TA_GCCGGCG	4	354	FALSE	FALSE
19_v.txt	33114	33114-SNV-C-T	SNV	1	C	T	47	27802	0.169053	41.9791	msh2	FALSE	CAN	JSY22	4	msh2-Rep4	GCC	C>T	A/T+1	G/C-1	CG>TA	CG>TA	ACTGGGCCGGCGT	CCGGCGT	CGG	GCC	C	A	C>T	C>T_GCC	CG>TA_CCGGCGT	4	353	FALSE	FALSE
19_v.txt	33118	33118-SNV-C-T	SNV	1	C	T	34	27802	0.122293	38.7353	msh2	FALSE	CAN	JSY22	4	msh2-Rep4	GCG	C>T	A/T+1	G/C-1	CG>TA	CG>TA	GGCCGGCGTTGGT	CGTTGGT	CGC	GCG	C	A	C>T	C>T_GCG	CG>TA_CGTTGGT	4	349	FALSE	FALSE
19_v.txt	33153	33153-SNV-C-T	SNV	1	C	T	125	27802	0.449608	36.7011	msh2	FALSE	CAN	JSY22	4	msh2-Rep4	ACC	C>T	A/T+1	G/C-1	CG>TA	CG>TA	AAAAGACCTGTAC	CCTGTAC	TGG	ACC	C	A	C>T	C>T_ACC	CG>TA_CCTGTAC	4	314	FALSE	FALSE
19_v.txt	33159	33159-SNV-C-T	SNV	1	C	T	28	27802	0.100712	34.8571	msh2	FALSE	CAN	JSY22	4	msh2-Rep4	ACC	C>T	A/T+1	G/C-1	CG>TA	CG>TA	CCTGTACCAATAG	CCAATAG	TGG	ACC	C	A	C>T	C>T_ACC	CG>TA_CCAATAG	4	308	FALSE	FALSE
19_v.txt	33168	33168-SNV-C-T	SNV	1	C	T	88	27801	0.316535	37.3295	msh2	FALSE	CAN	JSY22	4	msh2-Rep4	ACC	C>T	A/T+1	G/C-1	CG>TA	CG>TA	ATAGTACCACCAA	CCACCAA	TGG	ACC	C	A	C>T	C>T_ACC	CG>TA_CCACCAA	4	299	FALSE	FALSE
19_v.txt	33171	33171-SNV-C-T	SNV	1	C	T	70	27802	0.25178	36.8143	msh2	FALSE	CAN	JSY22	4	msh2-Rep4	ACC	C>T	A/T+1	G/C-1	CG>TA	CG>TA	GTACCACCAAGGG	CCAAGGG	TGG	ACC	C	A	C>T	C>T_ACC	CG>TA_CCAAGGG	4	296	FALSE	FALSE
19_v.txt	33199	33199-SNV-G-A	SNV	1	G	A	21	25492	0.0823788	36.4286	msh2	FALSE	CAN	JSY22	4	msh2-Rep4	TGC	G>A	A/T+1	G/C-1	CG>TA	CG>TA	GTCTTTGCTTAAG	GCTTAAG	ACG	ACG	C	T	C>T	C>T_ACG	CG>TA_GCTTAAG	4	268	FALSE	FALSE
19_v.txt	33258	33258-SNV-C-T	SNV	1	C	T	36	25492	0.141221	42.9444	msh2	FALSE	CAN	JSY22	4	msh2-Rep4	GCC	C>T	A/T+1	G/C-1	CG>TA	CG>TA	CCTATGCCATCCT	CCATCCT	CGG	GCC	C	A	C>T	C>T_GCC	CG>TA_CCATCCT	4	209	FALSE	FALSE
19_v.txt	33276	33276-SNV-G-A	SNV	1	G	A	20	25492	0.078456	48.25	msh2	FALSE	CAN	JSY22	4	msh2-Rep4	CGT	G>A	A/T+1	G/C-1	CG>TA	CG>TA	GAGAACGTATCCT	GTATCCT	GCA	GCA	C	T	C>T	C>T_GCA	CG>TA_GTATCCT	4	191	FALSE	FALSE
19_v.txt	33309	33309-SNV-C-T	SNV	1	C	T	28	25492	0.109838	53.1429	msh2	FALSE	CAN	JSY22	4	msh2-Rep4	GCG	C>T	A/T+1	G/C-1	CG>TA	CG>TA	AAAGAGCGCAATG	CGCAATG	CGC	GCG	C	A	C>T	C>T_GCG	CG>TA_CGCAATG	4	158	FALSE	FALSE
19_v.txt	33392	33392-SNV-G-A	SNV	1	G	A	25	25492	0.09807	44.88	msh2	FALSE	CAN	JSY22	4	msh2-Rep4	CGT	G>A	A/T+1	G/C-1	CG>TA	CG>TA	AACGTCGTGAAAG	GTGAAAG	GCA	GCA	C	T	C>T	C>T_GCA	CG>TA_GTGAAAG	4	75	FALSE	FALSE
19_v.txt	33412	33412-SNV-G-A	SNV	1	G	A	41	25492	0.160835	50.1463	msh2	FALSE	CAN	JSY22	4	msh2-Rep4	GGC	G>A	A/T+1	G/C-1	CG>TA	CG>TA	TGACCGGCTCATT	GCTCATT	CCG	CCG	C	T	C>T	C>T_CCG	CG>TA_GCTCATT	4	55	FALSE	FALSE
19_v.txt	33474	33474-SNV-C-T	SNV	1	C	T	30	25490	0.117693	36.4	msh2	FALSE	CAN	JSY22	4	msh2-Rep4	GCC	C>T	A/T+1	G/C-1	CG>TA	CG>TA	GCTATGCCTTTTT	CCTTTTT	CGG	GCC	C	A	C>T	C>T_GCC	CG>TA_CCTTTTT	4	N_A	FALSE	FALSE
19_v.txt	32076	32076-SNV-C-G	SNV	1	C	G	2	21220	0.009425	64	msh2	FALSE	CAN	JSY22	4	msh2-Rep4	CCA	C>G	G/C+1	G/C-1	CG>GC	CG>GC	AATAACCATGCAA	CATGCAA	GGT	CCA	C	C	C>G	C>G_CCA	CG>GC_CATGCAA	4	1391	FALSE	FALSE
19_v.txt	32165	32165-SNV-G-C	SNV	1	G	C	2	21220	0.009425	50.9986	msh2	FALSE	CAN	JSY22	4	msh2-Rep4	CGC	G>C	G/C+1	G/C-1	CG>GC	CG>GC	CAAAGCGCCAAAT	GCCAAAT	GCG	GCG	C	G	C>G	C>G_GCG	CG>GC_GCCAAAT	4	1302	FALSE	FALSE
19_v.txt	32487	32487-SNV-C-G	SNV	1	C	G	2	24044	0.008318	63.9953	msh2	FALSE	CAN	JSY22	4	msh2-Rep4	ACG	C>G	G/C+1	G/C-1	CG>GC	CG>GC	AAGATACGGAAAA	CGGAAAA	TGC	ACG	C	C	C>G	C>G_ACG	CG>GC_CGGAAAA	4	980	FALSE	FALSE
19_v.txt	32529	32529-SNV-G-C	SNV	1	G	C	2	24043	0.008318	18.0002	msh2	FALSE	CAN	JSY22	4	msh2-Rep4	GGG	G>C	G/C+1	G/C-1	CG>GC	CG>GC	TTTCTGGGGTTTG	GGGTTTG	CCC	CCC	C	G	C>G	C>G_CCC	CG>GC_GGGTTTG	4	938	FALSE	FALSE
19_v.txt	32536	32536-SNV-C-G	SNV	1	C	G	2	24043	0.008318	30.5011	msh2	FALSE	CAN	JSY22	4	msh2-Rep4	GCA	C>G	G/C+1	G/C-1	CG>GC	CG>GC	GGTTTGCAGCTTC	CAGCTTC	CGT	GCA	C	C	C>G	C>G_GCA	CG>GC_CAGCTTC	4	931	FALSE	FALSE
19_v.txt	32557	32557-SNV-C-G	SNV	1	C	G	31	24031	0.129	37.0323	msh2	FALSE	CAN	JSY22	4	msh2-Rep4	CCA	C>G	G/C+1	G/C-1	CG>GC	CG>GC	TGATACCAACTAG	CAACTAG	GGT	CCA	C	C	C>G	C>G_CCA	CG>GC_CAACTAG	4	910	FALSE	FALSE
19_v.txt	33153	33153-SNV-C-G	SNV	1	C	G	4	27802	0.0143875	34.9986	msh2	FALSE	CAN	JSY22	4	msh2-Rep4	ACC	C>G	G/C+1	G/C-1	CG>GC	CG>GC	AAAAGACCTGTAC	CCTGTAC	TGG	ACC	C	C	C>G	C>G_ACC	CG>GC_CCTGTAC	4	314	FALSE	FALSE
19_v.txt	31657	31657-SNV-G-T	SNV	1	G	T	39	6119	0.637359	19.2051	msh2	FALSE	CAN	JSY22	4	msh2-Rep4	GGC	G>T	A/T+1	G/C-1	CG>AT	CG>AT	GAAATGGCGTGGA	GCGTGGA	CCG	CCG	C	A	C>A	C>A_CCG	CG>AT_GCGTGGA	4	1810	FALSE	FALSE
19_v.txt	31694	31694-SNV-C-A	SNV	1	C	A	9	6119	0.147083	61.1111	msh2	FALSE	CAN	JSY22	4	msh2-Rep4	TCT	C>A	A/T+1	G/C-1	CG>AT	CG>AT	TCATATCTATGCT	CTATGCT	AGA	TCT	C	T	C>A	C>A_TCT	CG>AT_CTATGCT	4	1773	FALSE	FALSE
19_v.txt	31869	31869-SNV-G-T	SNV	1	G	T	6	6119	0.0980552	41.5	msh2	FALSE	CAN	JSY22	4	msh2-Rep4	AGA	G>T	A/T+1	G/C-1	CG>AT	CG>AT	AAAATAGAGATAT	GAGATAT	TCT	TCT	C	A	C>A	C>A_TCT	CG>AT_GAGATAT	4	1598	FALSE	FALSE
19_v.txt	31981	31981-SNV-G-T	SNV	1	G	T	41	21220	0.193214	40.7561	msh2	FALSE	CAN	JSY22	4	msh2-Rep4	GGC	G>T	A/T+1	G/C-1	CG>AT	CG>AT	AGCCGGGCATTAA	GCATTAA	CCG	CCG	C	A	C>A	C>A_CCG	CG>AT_GCATTAA	4	1486	FALSE	FALSE
19_v.txt	32027	32027-SNV-G-T	SNV	1	G	T	20	21220	0.0942507	59.3	msh2	FALSE	CAN	JSY22	4	msh2-Rep4	GGT	G>T	A/T+1	G/C-1	CG>AT	CG>AT	GCCACGGTATTTC	GTATTTC	CCA	CCA	C	A	C>A	C>A_CCA	CG>AT_GTATTTC	4	1440	FALSE	FALSE
19_v.txt	32088	32088-SNV-C-A	SNV	1	C	A	43	21219	0.202649	59.0698	msh2	FALSE	CAN	JSY22	4	msh2-Rep4	GCC	C>A	A/T+1	G/C-1	CG>AT	CG>AT	AAAAAGCCTGCAA	CCTGCAA	CGG	GCC	C	T	C>A	C>A_GCC	CG>AT_CCTGCAA	4	1379	FALSE	FALSE
19_v.txt	32089	32089-SNV-C-A	SNV	1	C	A	38	21219	0.179085	58.2895	msh2	FALSE	CAN	JSY22	4	msh2-Rep4	CCT	C>A	A/T+1	G/C-1	CG>AT	CG>AT	AAAAGCCTGCAAC	CTGCAAC	GGA	CCT	C	T	C>A	C>A_CCT	CG>AT_CTGCAAC	4	1378	FALSE	FALSE
19_v.txt	32188	32188-SNV-C-A	SNV	1	C	A	14	21220	0.0659755	43.8571	msh2	FALSE	CAN	JSY22	4	msh2-Rep4	ACT	C>A	A/T+1	G/C-1	CG>AT	CG>AT	CGAAAACTGCAAT	CTGCAAT	TGA	ACT	C	T	C>A	C>A_ACT	CG>AT_CTGCAAT	4	1279	FALSE	FALSE
19_v.txt	32195	32195-SNV-G-T	SNV	1	G	T	17	21220	0.0801131	41.7647	msh2	FALSE	CAN	JSY22	4	msh2-Rep4	TGT	G>T	A/T+1	G/C-1	CG>AT	CG>AT	TGCAATGTATGGA	GTATGGA	ACA	ACA	C	A	C>A	C>A_ACA	CG>AT_GTATGGA	4	1272	FALSE	FALSE
19_v.txt	32199	32199-SNV-G-T	SNV	1	G	T	14	21220	0.0659755	45.3571	msh2	FALSE	CAN	JSY22	4	msh2-Rep4	TGG	G>T	A/T+1	G/C-1	CG>AT	CG>AT	ATGTATGGAACAC	GGAACAC	ACC	ACC	C	A	C>A	C>A_ACC	CG>AT_GGAACAC	4	1268	FALSE	FALSE
19_v.txt	32271	32271-SNV-C-A	SNV	1	C	A	25	24044	0.103976	33.8	msh2	FALSE	CAN	JSY22	4	msh2-Rep4	ACG	C>A	A/T+1	G/C-1	CG>AT	CG>AT	AAAATACGGGAAC	CGGGAAC	TGC	ACG	C	T	C>A	C>A_ACG	CG>AT_CGGGAAC	4	1196	FALSE	FALSE
19_v.txt	32272	32272-SNV-G-T	SNV	1	G	T	13	24044	0.0540675	25.3883	msh2	FALSE	CAN	JSY22	4	msh2-Rep4	CGG	G>T	A/T+1	G/C-1	CG>AT	CG>AT	AAATACGGGAACC	GGGAACC	GCC	GCC	C	A	C>A	C>A_GCC	CG>AT_GGGAACC	4	1195	FALSE	FALSE
19_v.txt	32274	32274-SNV-G-T	SNV	1	G	T	1696	24044	7.05373	36.4758	msh2	FALSE	CAN	JSY22	4	msh2-Rep4	GGA	G>T	A/T+1	G/C-1	CG>AT	CG>AT	ATACGGGAACCAA	GAACCAA	CCT	CCT	C	A	C>A	C>A_CCT	CG>AT_GAACCAA	4	1193	FALSE	FALSE
19_v.txt	32282	32282-SNV-G-T	SNV	1	G	T	29	24044	0.120612	46.2069	msh2	FALSE	CAN	JSY22	4	msh2-Rep4	CGT	G>T	A/T+1	G/C-1	CG>AT	CG>AT	ACCAACGTAAATA	GTAAATA	GCA	GCA	C	A	C>A	C>A_GCA	CG>AT_GTAAATA	4	1185	FALSE	FALSE
19_v.txt	32301	32301-SNV-G-T	SNV	1	G	T	27	24044	0.112294	54.5926	msh2	FALSE	CAN	JSY22	4	msh2-Rep4	GGC	G>T	A/T+1	G/C-1	CG>AT	CG>AT	TTTGCGGCAGAAA	GCAGAAA	CCG	CCG	C	A	C>A	C>A_CCG	CG>AT_GCAGAAA	4	1166	FALSE	FALSE
19_v.txt	32373	32373-SNV-G-T	SNV	1	G	T	18	24044	0.0748628	57.7222	msh2	FALSE	CAN	JSY22	4	msh2-Rep4	AGC	G>T	A/T+1	G/C-1	CG>AT	CG>AT	TCAATAGCAATAA	GCAATAA	TCG	TCG	C	A	C>A	C>A_TCG	CG>AT_GCAATAA	4	1094	FALSE	FALSE
19_v.txt	32399	32399-SNV-G-T	SNV	1	G	T	71	24044	0.295292	59.7183	msh2	FALSE	CAN	JSY22	4	msh2-Rep4	CGT	G>T	A/T+1	G/C-1	CG>AT	CG>AT	AGAAACGTAGGAA	GTAGGAA	GCA	GCA	C	A	C>A	C>A_GCA	CG>AT_GTAGGAA	4	1068	FALSE	FALSE
19_v.txt	32449	32449-SNV-C-A	SNV	1	C	A	49	24044	0.203793	49.2245	msh2	FALSE	CAN	JSY22	4	msh2-Rep4	CCA	C>A	A/T+1	G/C-1	CG>AT	CG>AT	AAAGTCCAATGAA	CAATGAA	GGT	CCA	C	T	C>A	C>A_CCA	CG>AT_CAATGAA	4	1018	FALSE	FALSE
19_v.txt	32463	32463-SNV-G-T	SNV	1	G	T	24	24044	0.099817	46.4583	msh2	FALSE	CAN	JSY22	4	msh2-Rep4	AGA	G>T	A/T+1	G/C-1	CG>AT	CG>AT	AATAGAGAGCCAA	GAGCCAA	TCT	TCT	C	A	C>A	C>A_TCT	CG>AT_GAGCCAA	4	1004	FALSE	FALSE
19_v.txt	32488	32488-SNV-G-T	SNV	1	G	T	100	24044	0.415904	46.7248	msh2	FALSE	CAN	JSY22	4	msh2-Rep4	CGG	G>T	A/T+1	G/C-1	CG>AT	CG>AT	AGATACGGAAAAC	GGAAAAC	GCC	GCC	C	A	C>A	C>A_GCC	CG>AT_GGAAAAC	4	979	FALSE	FALSE
19_v.txt	32515	32515-SNV-G-T	SNV	1	G	T	17	24044	0.0707037	41.3529	msh2	FALSE	CAN	JSY22	4	msh2-Rep4	GGA	G>T	A/T+1	G/C-1	CG>AT	CG>AT	CTCTTGGAACGGA	GAACGGA	CCT	CCT	C	A	C>A	C>A_CCT	CG>AT_GAACGGA	4	952	FALSE	FALSE
19_v.txt	32529	32529-SNV-G-T	SNV	1	G	T	21	24043	0.0873435	39.238	msh2	FALSE	CAN	JSY22	4	msh2-Rep4	GGG	G>T	A/T+1	G/C-1	CG>AT	CG>AT	TTTCTGGGGTTTG	GGGTTTG	CCC	CCC	C	A	C>A	C>A_CCC	CG>AT_GGGTTTG	4	938	FALSE	FALSE
19_v.txt	32530	32530-SNV-G-T	SNV	1	G	T	581	24043	2.4165	39.6763	msh2	FALSE	CAN	JSY22	4	msh2-Rep4	GGG	G>T	A/T+1	G/C-1	CG>AT	CG>AT	TTCTGGGGTTTGC	GGTTTGC	CCC	CCC	C	A	C>A	C>A_CCC	CG>AT_GGTTTGC	4	937	FALSE	FALSE
19_v.txt	32572	32572-SNV-C-A	SNV	1	C	A	44	24896	0.176735	35.2045	msh2	FALSE	CAN	JSY22	4	msh2-Rep4	CCT	C>A	A/T+1	G/C-1	CG>AT	CG>AT	CAGTACCTTGAAA	CTTGAAA	GGA	CCT	C	T	C>A	C>A_CCT	CG>AT_CTTGAAA	4	895	FALSE	FALSE
19_v.txt	32660	32660-SNV-C-A	SNV	1	C	A	3	24895	0.0120506	64	msh2	FALSE	CAN	JSY22	4	msh2-Rep4	CCC	C>A	A/T+1	G/C-1	CG>AT	CG>AT	TGGACCCCAGGCA	CCAGGCA	GGG	CCC	C	T	C>A	C>A_CCC	CG>AT_CCAGGCA	4	807	FALSE	FALSE
19_v.txt	32794	32794-SNV-C-A	SNV	1	C	A	30	24896	0.120501	31.4333	msh2	FALSE	CAN	JSY22	4	msh2-Rep4	TCA	C>A	A/T+1	G/C-1	CG>AT	CG>AT	CGAATTCACCGTA	CACCGTA	AGT	TCA	C	T	C>A	C>A_TCA	CG>AT_CACCGTA	4	673	FALSE	FALSE
19_v.txt	32811	32811-SNV-G-T	SNV	1	G	T	12	24896	0.0482005	44.1667	msh2	FALSE	CAN	JSY22	4	msh2-Rep4	AGG	G>T	A/T+1	G/C-1	CG>AT	CG>AT	TTGACAGGGAACA	GGGAACA	TCC	TCC	C	A	C>A	C>A_TCC	CG>AT_GGGAACA	4	656	FALSE	FALSE
19_v.txt	32812	32812-SNV-G-T	SNV	1	G	T	48	24896	0.192802	46.4486	msh2	FALSE	CAN	JSY22	4	msh2-Rep4	GGG	G>T	A/T+1	G/C-1	CG>AT	CG>AT	TGACAGGGAACAA	GGAACAA	CCC	CCC	C	A	C>A	C>A_CCC	CG>AT_GGAACAA	4	655	FALSE	FALSE
19_v.txt	32816	32816-SNV-C-A	SNV	1	C	A	23	24896	0.0923843	41	msh2	FALSE	CAN	JSY22	4	msh2-Rep4	ACA	C>A	A/T+1	G/C-1	CG>AT	CG>AT	AGGGAACAAGTTC	CAAGTTC	TGT	ACA	C	T	C>A	C>A_ACA	CG>AT_CAAGTTC	4	651	FALSE	FALSE
19_v.txt	32819	32819-SNV-G-T	SNV	1	G	T	18	24896	0.0723008	43.5	msh2	FALSE	CAN	JSY22	4	msh2-Rep4	AGT	G>T	A/T+1	G/C-1	CG>AT	CG>AT	GAACAAGTTCATT	GTTCATT	TCA	TCA	C	A	C>A	C>A_TCA	CG>AT_GTTCATT	4	648	FALSE	FALSE
19_v.txt	32840	32840-SNV-C-A	SNV	1	C	A	4	24896	0.0160668	37.75	msh2	FALSE	CAN	JSY22	4	msh2-Rep4	CCC	C>A	A/T+1	G/C-1	CG>AT	CG>AT	AATTACCCAAAAA	CCAAAAA	GGG	CCC	C	T	C>A	C>A_CCC	CG>AT_CCAAAAA	4	627	FALSE	FALSE
19_v.txt	32841	32841-SNV-C-A	SNV	1	C	A	3	24896	0.0120501	38	msh2	FALSE	CAN	JSY22	4	msh2-Rep4	CCA	C>A	A/T+1	G/C-1	CG>AT	CG>AT	ATTACCCAAAAAA	CAAAAAA	GGT	CCA	C	T	C>A	C>A_CCA	CG>AT_CAAAAAA	4	626	FALSE	FALSE
19_v.txt	32940	32940-SNV-G-T	SNV	1	G	T	157	27802	0.564708	53.9823	msh2	FALSE	CAN	JSY22	4	msh2-Rep4	AGA	G>T	A/T+1	G/C-1	CG>AT	CG>AT	GCCCAAGAAAACC	GAAAACC	TCT	TCT	C	A	C>A	C>A_TCT	CG>AT_GAAAACC	4	527	FALSE	FALSE
19_v.txt	33112	33112-SNV-G-T	SNV	1	G	T	62	27802	0.223006	47.0697	msh2	FALSE	CAN	JSY22	4	msh2-Rep4	GGG	G>T	A/T+1	G/C-1	CG>AT	CG>AT	CCACTGGGCCGGC	GGCCGGC	CCC	CCC	C	A	C>A	C>A_CCC	CG>AT_GGCCGGC	4	355	FALSE	FALSE
19_v.txt	33114	33114-SNV-C-A	SNV	1	C	A	15	27802	0.053953	40.005	msh2	FALSE	CAN	JSY22	4	msh2-Rep4	GCC	C>A	A/T+1	G/C-1	CG>AT	CG>AT	ACTGGGCCGGCGT	CCGGCGT	CGG	GCC	C	T	C>A	C>A_GCC	CG>AT_CCGGCGT	4	353	FALSE	FALSE
19_v.txt	33154	33154-SNV-C-A	SNV	1	C	A	278	27802	0.999928	37.4769	msh2	FALSE	CAN	JSY22	4	msh2-Rep4	CCT	C>A	A/T+1	G/C-1	CG>AT	CG>AT	AAAGACCTGTACC	CTGTACC	GGA	CCT	C	T	C>A	C>A_CCT	CG>AT_CTGTACC	4	313	FALSE	FALSE
19_v.txt	33156	33156-SNV-G-T	SNV	1	G	T	13	27802	0.0467592	37.9231	msh2	FALSE	CAN	JSY22	4	msh2-Rep4	TGT	G>T	A/T+1	G/C-1	CG>AT	CG>AT	AGACCTGTACCAA	GTACCAA	ACA	ACA	C	A	C>A	C>A_ACA	CG>AT_GTACCAA	4	311	FALSE	FALSE
19_v.txt	33175	33175-SNV-G-T	SNV	1	G	T	9	27797	0.0323776	37.8889	msh2	FALSE	CAN	JSY22	4	msh2-Rep4	AGG	G>T	A/T+1	G/C-1	CG>AT	CG>AT	CACCAAGGGCAAT	GGGCAAT	TCC	TCC	C	A	C>A	C>A_TCC	CG>AT_GGGCAAT	4	292	FALSE	FALSE
19_v.txt	33195	33195-SNV-C-A	SNV	1	C	A	15	25492	0.058842	36.4667	msh2	FALSE	CAN	JSY22	4	msh2-Rep4	TCT	C>A	A/T+1	G/C-1	CG>AT	CG>AT	ATATGTCTTTGCT	CTTTGCT	AGA	TCT	C	T	C>A	C>A_TCT	CG>AT_CTTTGCT	4	272	FALSE	FALSE
19_v.txt	33205	33205-SNV-G-T	SNV	1	G	T	20	25492	0.078456	34.1017	msh2	FALSE	CAN	JSY22	4	msh2-Rep4	AGC	G>T	A/T+1	G/C-1	CG>AT	CG>AT	GCTTAAGCTCTCT	GCTCTCT	TCG	TCG	C	A	C>A	C>A_TCG	CG>AT_GCTCTCT	4	262	FALSE	FALSE
19_v.txt	33238	33238-SNV-C-A	SNV	1	C	A	27	25492	0.105916	34.7778	msh2	FALSE	CAN	JSY22	4	msh2-Rep4	CCT	C>A	A/T+1	G/C-1	CG>AT	CG>AT	CTTCTCCTTCATC	CTTCATC	GGA	CCT	C	T	C>A	C>A_CCT	CG>AT_CTTCATC	4	229	FALSE	FALSE
19_v.txt	33474	33474-SNV-C-A	SNV	1	C	A	49	25490	0.192232	32.6939	msh2	FALSE	CAN	JSY22	4	msh2-Rep4	GCC	C>A	A/T+1	G/C-1	CG>AT	CG>AT	GCTATGCCTTTTT	CCTTTTT	CGG	GCC	C	T	C>A	C>A_GCC	CG>AT_CCTTTTT	4	N_A	FALSE	FALSE
19_v.txt	32796	32796-MNV-CC-AA	MNV	2	CC	AA	1	24896	0.004017	36.5	msh2	FALSE	CAN	JSY22	4	msh2-Rep4	ACC	nope	>1bp-ins	>1bpdel	none	MNV	AATTCACCGTAAT	CCGTAAT	TGG	ACC	CC	none	NA	NA_ACC	MNV_CCGTAAT	4	671	FALSE	FALSE
19_v.txt	33153	33153-MNV-CC-AA	MNV	2	CC	AA	1	27802	0.003597	34.9994	msh2	FALSE	CAN	JSY22	4	msh2-Rep4	ACC	nope	>1bp-ins	>1bpdel	none	MNV	AAAAGACCTGTAC	CCTGTAC	TGG	ACC	CC	none	NA	NA_ACC	MNV_CCTGTAC	4	314	FALSE	FALSE
19_v.txt	31723	31723-Insertion---A	Insertion	1	-	A	2	6119	0.0326851	64	msh2	FALSE	CAN	JSY22	4	msh2-Rep4	CAA	nope	A/T+1	>1bpdel	none	A/T+1	TGTCCCAAAAAGT	AAAAAGT	GTT	CAA	-	T	NA	NA_CAA	A/T+1_AAAAAGT	4	1744	FALSE	FALSE
19_v.txt	32081	32081-Insertion---A	Insertion	1	-	A	90	21220	0.424128	62.3222	msh2	FALSE	CAN	JSY22	4	msh2-Rep4	CAA	nope	A/T+1	>1bpdel	none	A/T+1	CCATGCAAAAAAG	AAAAAAG	GTT	CAA	-	T	NA	NA_CAA	A/T+1_AAAAAAG	4	1386	FALSE	FALSE
19_v.txt	32081	32081-Insertion---AA	Insertion	2	-	AA	1	21220	0.004713	64	msh2	FALSE	CAN	JSY22	4	msh2-Rep4	CAA	nope	>1bp-ins	>1bpdel	none	>1bp-ins	CCATGCAAAAAAG	AAAAAAG	GTT	CAA	-	none	NA	NA_CAA	>1bp-ins_AAAAAAG	4	1386	FALSE	FALSE
19_v.txt	32210	32210-Insertion---T	Insertion	1	-	T	4	21220	0.0188501	38	msh2	FALSE	CAN	JSY22	4	msh2-Rep4	CTT	nope	A/T+1	>1bpdel	none	A/T+1	ACCACCTTTGGTG	TTTGGTG	GAA	CTT	-	A	NA	NA_CTT	A/T+1_TTTGGTG	4	1257	FALSE	FALSE
19_v.txt	32346	32346-Insertion---A	Insertion	1	-	A	67	24044	0.278656	62.0746	msh2	FALSE	CAN	JSY22	4	msh2-Rep4	CAA	nope	A/T+1	>1bpdel	none	A/T+1	TGTGGCAAAACCT	AAAACCT	GTT	CAA	-	T	NA	NA_CAA	A/T+1_AAAACCT	4	1121	FALSE	FALSE
19_v.txt	32450	32450-Insertion---A	Insertion	1	-	A	7	24044	0.0291133	56.4286	msh2	FALSE	CAN	JSY22	4	msh2-Rep4	CAA	nope	A/T+1	>1bpdel	none	A/T+1	AAGTCCAATGAAT	AATGAAT	GTT	CAA	-	T	NA	NA_CAA	A/T+1_AATGAAT	4	1017	FALSE	FALSE
19_v.txt	32498	32498-Insertion---T	Insertion	1	-	T	58	24044	0.241224	44.3793	msh2	FALSE	CAN	JSY22	4	msh2-Rep4	CTT	nope	A/T+1	>1bpdel	none	A/T+1	AACAACTTTTTTG	TTTTTTG	GAA	CTT	-	A	NA	NA_CTT	A/T+1_TTTTTTG	4	969	FALSE	FALSE
19_v.txt	32528	32528-Insertion---G	Insertion	1	-	G	89	24043	0.37017	41.6292	msh2	FALSE	CAN	JSY22	4	msh2-Rep4	TGG	nope	G/C+1	>1bpdel	none	G/C+1	TTTTCTGGGGTTT	GGGGTTT	ACC	TGG	-	C	NA	NA_TGG	G/C+1_GGGGTTT	4	939	FALSE	FALSE
19_v.txt	32631	32631-Insertion---T	Insertion	1	-	T	85	24896	0.34142	55.3529	msh2	FALSE	CAN	JSY22	4	msh2-Rep4	GTT	nope	A/T+1	>1bpdel	none	A/T+1	CCTTCGTTTTTAT	TTTTTAT	CAA	GTT	-	A	NA	NA_GTT	A/T+1_TTTTTAT	4	836	FALSE	FALSE
19_v.txt	32658	32658-Insertion---C	Insertion	1	-	C	2	24896	0.008033	64	msh2	FALSE	CAN	JSY22	4	msh2-Rep4	ACC	nope	G/C+1	>1bpdel	none	G/C+1	CCTGGACCCCAGG	CCCCAGG	TGG	ACC	-	G	NA	NA_ACC	G/C+1_CCCCAGG	4	809	FALSE	FALSE
19_v.txt	32728	32728-Insertion---A	Insertion	1	-	A	50	24896	0.200835	61.18	msh2	FALSE	CAN	JSY22	4	msh2-Rep4	CAA	nope	A/T+1	>1bpdel	none	A/T+1	CCATACAAAAACA	AAAAACA	GTT	CAA	-	T	NA	NA_CAA	A/T+1_AAAAACA	4	739	FALSE	FALSE
19_v.txt	32811	32811-Insertion---G	Insertion	1	-	G	42	24896	0.168702	44.6905	msh2	FALSE	CAN	JSY22	4	msh2-Rep4	AGG	nope	G/C+1	>1bpdel	none	G/C+1	TTGACAGGGAACA	GGGAACA	TCC	AGG	-	C	NA	NA_AGG	G/C+1_GGGAACA	4	656	FALSE	FALSE
19_v.txt	32842	32842-Insertion---A	Insertion	1	-	A	1067	24896	4.28583	41.9025	msh2	FALSE	CAN	JSY22	4	msh2-Rep4	CAA	nope	A/T+1	>1bpdel	none	A/T+1	TTACCCAAAAAAT	AAAAAAT	GTT	CAA	-	T	NA	NA_CAA	A/T+1_AAAAAAT	4	625	FALSE	FALSE
19_v.txt	32842	32842-Insertion---AA	Insertion	2	-	AA	1	24896	0.004017	38	msh2	FALSE	CAN	JSY22	4	msh2-Rep4	CAA	nope	>1bp-ins	>1bpdel	none	>1bp-ins	TTACCCAAAAAAT	AAAAAAT	GTT	CAA	-	none	NA	NA_CAA	>1bp-ins_AAAAAAT	4	625	FALSE	FALSE
19_v.txt	33081	33081-Insertion---ATAA	Insertion	4	-	ATAA	42	27802	0.151068	54.9167	msh2	FALSE	CAN	JSY22	4	msh2-Rep4	CAT	nope	>1bp-ins	>1bpdel	none	>1bp-ins	GAACCCATAAATA	ATAAATA	GTA	CAT	-	none	NA	NA_CAT	>1bp-ins_ATAAATA	4	386	FALSE	FALSE
19_v.txt	33206	33206-Insertion---CT	Insertion	2	-	CT	5	25492	0.019614	37.6	msh2	FALSE	CAN	JSY22	4	msh2-Rep4	GCT	nope	>1bp-ins	>1bpdel	none	>1bp-ins	CTTAAGCTCTCTC	CTCTCTC	CGA	GCT	-	none	NA	NA_GCT	>1bp-ins_CTCTCTC	4	261	FALSE	FALSE
19_v.txt	33331	33331-Insertion---T	Insertion	1	-	T	25	25492	0.09807	62.64	msh2	FALSE	CAN	JSY22	4	msh2-Rep4	CTT	nope	A/T+1	>1bpdel	none	A/T+1	CTTTACTTTTCTC	TTTTCTC	GAA	CTT	-	A	NA	NA_CTT	A/T+1_TTTTCTC	4	136	FALSE	FALSE
19_v.txt	33452	33452-Insertion---T	Insertion	1	-	T	3	25492	0.0117684	38	msh2	FALSE	CAN	JSY22	4	msh2-Rep4	CTT	nope	A/T+1	>1bpdel	none	A/T+1	GTCTTCTTTTGAA	TTTTGAA	GAA	CTT	-	A	NA	NA_CTT	A/T+1_TTTTGAA	4	15	FALSE	FALSE
19_v.txt	32337	32337-Deletion-AT--	Deletion	2	AT	-	331	24044	1.37664	62.2991	msh2	FALSE	CAN	JSY22	4	msh2-Rep4	GAT	nope	>1bp-ins	>1bpdel	none	>1bpdel	TTGAAGATATGTG	ATATGTG	CTA	GAT	AT	none	NA	NA_GAT	>1bpdel_ATATGTG	4	1130	FALSE	FALSE
19_v.txt	33081	33081-Deletion-ATAA--	Deletion	4	ATAA	-	33	27802	0.118696	56.5152	msh2	FALSE	CAN	JSY22	4	msh2-Rep4	CAT	nope	>1bp-ins	>1bpdel	none	>1bpdel	GAACCCATAAATA	ATAAATA	GTA	CAT	ATAA	none	NA	NA_CAT	>1bpdel_ATAAATA	4	386	FALSE	FALSE
19_v.txt	33094	33094-Deletion-AT--	Deletion	2	AT	-	19	27802	0.0683404	48.7895	msh2	FALSE	CAN	JSY22	4	msh2-Rep4	GAT	nope	>1bp-ins	>1bpdel	none	>1bpdel	AATATGATATAAG	ATATAAG	CTA	GAT	AT	none	NA	NA_GAT	>1bpdel_ATATAAG	4	373	FALSE	FALSE
19_v.txt	33206	33206-Deletion-CT--	Deletion	2	CT	-	7	25492	0.0274596	37.5714	msh2	FALSE	CAN	JSY22	4	msh2-Rep4	GCT	nope	>1bp-ins	>1bpdel	none	>1bpdel	CTTAAGCTCTCTC	CTCTCTC	CGA	GCT	CT	none	NA	NA_GCT	>1bpdel_CTCTCTC	4	261	FALSE	FALSE
19_v.txt	31723	31723-Deletion-A--	Deletion	1	A	-	9	6119	0.147083	60.3333	msh2	FALSE	CAN	JSY22	4	msh2-Rep4	CAA	nope	>1bp-ins	A/T-1	none	A/T-1	TGTCCCAAAAAGT	AAAAAGT	GTT	GTT	T	none	T>none	T>none_GTT	A/T-1_AAAAAGT	4	1744	FALSE	FALSE
19_v.txt	31863	31863-Deletion-A--	Deletion	1	A	-	27	6119	0.441249	45	msh2	FALSE	CAN	JSY22	4	msh2-Rep4	GAA	nope	>1bp-ins	A/T-1	none	A/T-1	AACAGGAAAATAG	AAAATAG	CTT	CTT	T	none	T>none	T>none_CTT	A/T-1_AAAATAG	4	1604	FALSE	FALSE
19_v.txt	31972	31972-Deletion-C--	Deletion	1	C	-	6	21220	0.0282752	34.8333	msh2	FALSE	CAN	JSY22	4	msh2-Rep4	GCC	nope	>1bp-ins	G/C-1	none	G/C-1	AATAAGCCAAGCC	CCAAGCC	CGG	GCC	C	none	nope	nope_GCC	G/C-1_CCAAGCC	4	1495	FALSE	FALSE
19_v.txt	31979	31979-Deletion-G--	Deletion	1	G	-	91	21220	0.428841	41.0769	msh2	FALSE	CAN	JSY22	4	msh2-Rep4	CGG	nope	>1bp-ins	G/C-1	none	G/C-1	CAAGCCGGGCATT	GGGCATT	GCC	GCC	C	none	C>none	C>none_GCC	G/C-1_GGGCATT	4	1488	FALSE	FALSE
19_v.txt	32075	32075-Deletion-C--	Deletion	1	C	-	2	21220	0.009425	60.5	msh2	FALSE	CAN	JSY22	4	msh2-Rep4	ACC	nope	>1bp-ins	G/C-1	none	G/C-1	AAATAACCATGCA	CCATGCA	TGG	ACC	C	none	nope	nope_ACC	G/C-1_CCATGCA	4	1392	FALSE	FALSE
19_v.txt	32081	32081-Deletion-A--	Deletion	1	A	-	830	21220	3.9114	63.0181	msh2	FALSE	CAN	JSY22	4	msh2-Rep4	CAA	nope	>1bp-ins	A/T-1	none	A/T-1	CCATGCAAAAAAG	AAAAAAG	GTT	GTT	T	none	T>none	T>none_GTT	A/T-1_AAAAAAG	4	1386	FALSE	FALSE
19_v.txt	32088	32088-Deletion-C--	Deletion	1	C	-	1	21219	0.004713	64	msh2	FALSE	CAN	JSY22	4	msh2-Rep4	GCC	nope	>1bp-ins	G/C-1	none	G/C-1	AAAAAGCCTGCAA	CCTGCAA	CGG	GCC	C	none	nope	nope_GCC	G/C-1_CCTGCAA	4	1379	FALSE	FALSE
19_v.txt	32106	32106-Deletion-T--	Deletion	1	T	-	54	21220	0.254477	59.8148	msh2	FALSE	CAN	JSY22	4	msh2-Rep4	ATT	nope	>1bp-ins	A/T-1	none	A/T-1	GTGATATTTAATA	TTTAATA	TAA	ATT	T	none	nope	nope_ATT	A/T-1_TTTAATA	4	1361	FALSE	FALSE
19_v.txt	32184	32184-Deletion-A--	Deletion	1	A	-	174	21220	0.819981	45.8563	msh2	FALSE	CAN	JSY22	4	msh2-Rep4	GAA	nope	>1bp-ins	A/T-1	none	A/T-1	GTAACGAAAACTG	AAAACTG	CTT	CTT	T	none	T>none	T>none_CTT	A/T-1_AAAACTG	4	1283	FALSE	FALSE
19_v.txt	32199	32199-Deletion-G--	Deletion	1	G	-	10	21220	0.0471254	51	msh2	FALSE	CAN	JSY22	4	msh2-Rep4	TGG	nope	>1bp-ins	G/C-1	none	G/C-1	ATGTATGGAACAC	GGAACAC	ACC	ACC	C	none	C>none	C>none_ACC	G/C-1_GGAACAC	4	1268	FALSE	FALSE
19_v.txt	32210	32210-Deletion-T--	Deletion	1	T	-	5	21220	0.0235627	38	msh2	FALSE	CAN	JSY22	4	msh2-Rep4	CTT	nope	>1bp-ins	A/T-1	none	A/T-1	ACCACCTTTGGTG	TTTGGTG	GAA	CTT	T	none	nope	nope_CTT	A/T-1_TTTGGTG	4	1257	FALSE	FALSE
19_v.txt	32272	32272-Deletion-G--	Deletion	1	G	-	19	24044	0.0790218	37.3684	msh2	FALSE	CAN	JSY22	4	msh2-Rep4	CGG	nope	>1bp-ins	G/C-1	none	G/C-1	AAATACGGGAACC	GGGAACC	GCC	GCC	C	none	C>none	C>none_GCC	G/C-1_GGGAACC	4	1195	FALSE	FALSE
19_v.txt	32346	32346-Deletion-A--	Deletion	1	A	-	73	24044	0.30361	60.4384	msh2	FALSE	CAN	JSY22	4	msh2-Rep4	CAA	nope	>1bp-ins	A/T-1	none	A/T-1	TGTGGCAAAACCT	AAAACCT	GTT	GTT	T	none	T>none	T>none_GTT	A/T-1_AAAACCT	4	1121	FALSE	FALSE
19_v.txt	32442	32442-Deletion-A--	Deletion	1	A	-	41	24044	0.170521	53.4878	msh2	FALSE	CAN	JSY22	4	msh2-Rep4	TAA	nope	>1bp-ins	A/T-1	none	A/T-1	GGAACTAAAAGTC	AAAAGTC	ATT	ATT	T	none	T>none	T>none_ATT	A/T-1_AAAAGTC	4	1025	FALSE	FALSE
19_v.txt	32490	32490-Deletion-A--	Deletion	1	A	-	513	24044	2.13359	45	msh2	FALSE	CAN	JSY22	4	msh2-Rep4	GAA	nope	>1bp-ins	A/T-1	none	A/T-1	ATACGGAAAACAA	AAAACAA	CTT	CTT	T	none	T>none	T>none_CTT	A/T-1_AAAACAA	4	977	FALSE	FALSE
19_v.txt	32498	32498-Deletion-T--	Deletion	1	T	-	1320	24044	5.48994	44.4818	msh2	FALSE	CAN	JSY22	4	msh2-Rep4	CTT	nope	>1bp-ins	A/T-1	none	A/T-1	AACAACTTTTTTG	TTTTTTG	GAA	CTT	T	none	nope	nope_CTT	A/T-1_TTTTTTG	4	969	FALSE	FALSE
19_v.txt	32528	32528-Deletion-G--	Deletion	1	G	-	36	24043	0.149732	43.3056	msh2	FALSE	CAN	JSY22	4	msh2-Rep4	TGG	nope	>1bp-ins	G/C-1	none	G/C-1	TTTTCTGGGGTTT	GGGGTTT	ACC	ACC	C	none	C>none	C>none_ACC	G/C-1_GGGGTTT	4	939	FALSE	FALSE
19_v.txt	32536	32536-Deletion-C--	Deletion	1	C	-	1	24043	0.004159	38	msh2	FALSE	CAN	JSY22	4	msh2-Rep4	GCA	nope	>1bp-ins	G/C-1	none	G/C-1	GGTTTGCAGCTTC	CAGCTTC	CGT	GCA	C	none	nope	nope_GCA	G/C-1_CAGCTTC	4	931	FALSE	FALSE
19_v.txt	32583	32583-Deletion-A--	Deletion	1	A	-	46	24896	0.184769	37	msh2	FALSE	CAN	JSY22	4	msh2-Rep4	GAA	nope	>1bp-ins	A/T-1	none	A/T-1	AATGTGAAGGCAG	AAGGCAG	CTT	CTT	T	none	T>none	T>none_CTT	A/T-1_AAGGCAG	4	884	FALSE	FALSE
19_v.txt	32594	32594-Deletion-A--	Deletion	1	A	-	13	24896	0.0522172	41.4615	msh2	FALSE	CAN	JSY22	4	msh2-Rep4	TAA	nope	>1bp-ins	A/T-1	none	A/T-1	AGCGTTAATCAAA	AATCAAA	ATT	ATT	T	none	T>none	T>none_ATT	A/T-1_AATCAAA	4	873	FALSE	FALSE
19_v.txt	32631	32631-Deletion-T--	Deletion	1	T	-	85	24896	0.34142	53.1647	msh2	FALSE	CAN	JSY22	4	msh2-Rep4	GTT	nope	>1bp-ins	A/T-1	none	A/T-1	CCTTCGTTTTTAT	TTTTTAT	CAA	GTT	T	none	nope	nope_GTT	A/T-1_TTTTTAT	4	836	FALSE	FALSE
19_v.txt	32652	32652-Deletion-C--	Deletion	1	C	-	43	24896	0.172719	56.4884	msh2	FALSE	CAN	JSY22	4	msh2-Rep4	ACC	nope	>1bp-ins	G/C-1	none	G/C-1	ATTATACCTGGAC	CCTGGAC	TGG	ACC	C	none	nope	nope_ACC	G/C-1_CCTGGAC	4	815	FALSE	FALSE
19_v.txt	32658	32658-Deletion-C--	Deletion	1	C	-	102	24896	0.409704	61.402	msh2	FALSE	CAN	JSY22	4	msh2-Rep4	ACC	nope	>1bp-ins	G/C-1	none	G/C-1	CCTGGACCCCAGG	CCCCAGG	TGG	ACC	C	none	nope	nope_ACC	G/C-1_CCCCAGG	4	809	FALSE	FALSE
19_v.txt	32678	32678-Deletion-C--	Deletion	1	C	-	2	24896	0.008033	64	msh2	FALSE	CAN	JSY22	4	msh2-Rep4	TCC	nope	>1bp-ins	G/C-1	none	G/C-1	GTTTCTCCAATAA	CCAATAA	AGG	TCC	C	none	nope	nope_TCC	G/C-1_CCAATAA	4	789	FALSE	FALSE
19_v.txt	32707	32707-Deletion-C--	Deletion	1	C	-	5917	24896	23.7669	62.2812	msh2	FALSE	CAN	JSY22	4	msh2-Rep4	ACC	nope	>1bp-ins	G/C-1	none	G/C-1	CGGTAACCCCAGC	CCCCAGC	TGG	ACC	C	none	nope	nope_ACC	G/C-1_CCCCAGC	4	760	FALSE	FALSE
19_v.txt	32719	32719-Deletion-A--	Deletion	1	A	-	27	24896	0.108451	59.8889	msh2	FALSE	CAN	JSY22	4	msh2-Rep4	CAA	nope	>1bp-ins	A/T-1	none	A/T-1	CACCACAAACCAT	AAACCAT	GTT	GTT	T	none	T>none	T>none_GTT	A/T-1_AAACCAT	4	748	FALSE	FALSE
19_v.txt	32728	32728-Deletion-A--	Deletion	1	A	-	2225	24894	8.9379	60.3987	msh2	FALSE	CAN	JSY22	4	msh2-Rep4	CAA	nope	>1bp-ins	A/T-1	none	A/T-1	CCATACAAAAACA	AAAAACA	GTT	GTT	T	none	T>none	T>none_GTT	A/T-1_AAAAACA	4	739	FALSE	FALSE
19_v.txt	32760	32760-Deletion-A--	Deletion	1	A	-	48	24896	0.192802	52.125	msh2	FALSE	CAN	JSY22	4	msh2-Rep4	TAA	nope	>1bp-ins	A/T-1	none	A/T-1	ATGGCTAAAACTT	AAAACTT	ATT	ATT	T	none	T>none	T>none_ATT	A/T-1_AAAACTT	4	707	FALSE	FALSE
19_v.txt	32842	32842-Deletion-A--	Deletion	1	A	-	2351	24896	9.44328	41.5296	msh2	FALSE	CAN	JSY22	4	msh2-Rep4	CAA	nope	>1bp-ins	A/T-1	none	A/T-1	TTACCCAAAAAAT	AAAAAAT	GTT	GTT	T	none	T>none	T>none_GTT	A/T-1_AAAAAAT	4	625	FALSE	FALSE
19_v.txt	32855	32855-Deletion-C--	Deletion	1	C	-	2	24896	0.008033	38	msh2	FALSE	CAN	JSY22	4	msh2-Rep4	TCC	nope	>1bp-ins	G/C-1	none	G/C-1	ACTAATCCATGCC	CCATGCC	AGG	TCC	C	none	nope	nope_TCC	G/C-1_CCATGCC	4	612	FALSE	FALSE
19_v.txt	32924	32924-Deletion-A--	Deletion	1	A	-	345	27802	1.24092	55.6783	msh2	FALSE	CAN	JSY22	4	msh2-Rep4	CAA	nope	>1bp-ins	A/T-1	none	A/T-1	CAGGGCAAAAGTG	AAAAGTG	GTT	GTT	T	none	T>none	T>none_GTT	A/T-1_AAAAGTG	4	543	FALSE	FALSE
19_v.txt	32941	32941-Deletion-A--	Deletion	1	A	-	111	27802	0.399252	59.036	msh2	FALSE	CAN	JSY22	4	msh2-Rep4	GAA	nope	>1bp-ins	A/T-1	none	A/T-1	CCCAAGAAAACCA	AAAACCA	CTT	CTT	T	none	T>none	T>none_CTT	A/T-1_AAAACCA	4	526	FALSE	FALSE
19_v.txt	32983	32983-Deletion-A--	Deletion	1	A	-	172	27802	0.618661	61.8721	msh2	FALSE	CAN	JSY22	4	msh2-Rep4	GAA	nope	>1bp-ins	A/T-1	none	A/T-1	CTGGAGAAAGGAA	AAAGGAA	CTT	CTT	T	none	T>none	T>none_CTT	A/T-1_AAAGGAA	4	484	FALSE	FALSE
19_v.txt	33000	33000-Deletion-A--	Deletion	1	A	-	351	27802	1.2625	62.4302	msh2	FALSE	CAN	JSY22	4	msh2-Rep4	GAA	nope	>1bp-ins	A/T-1	none	A/T-1	TGTGAGAAAACTG	AAAACTG	CTT	CTT	T	none	T>none	T>none_CTT	A/T-1_AAAACTG	4	467	FALSE	FALSE
19_v.txt	33018	33018-Deletion-G--	Deletion	1	G	-	11	27802	0.0395655	64	msh2	FALSE	CAN	JSY22	4	msh2-Rep4	TGT	nope	>1bp-ins	G/C-1	none	G/C-1	GAGGATGTAACAG	GTAACAG	ACA	ACA	C	none	C>none	C>none_ACA	G/C-1_GTAACAG	4	449	FALSE	FALSE
19_v.txt	33072	33072-Deletion-A--	Deletion	1	A	-	32	27802	0.1151	50.25	msh2	FALSE	CAN	JSY22	4	msh2-Rep4	CAA	nope	>1bp-ins	A/T-1	none	A/T-1	TATGCCAAAGAAC	AAAGAAC	GTT	GTT	T	none	T>none	T>none_GTT	A/T-1_AAAGAAC	4	395	FALSE	FALSE
19_v.txt	33138	33138-Deletion-A--	Deletion	1	A	-	107	27802	0.384864	41.3178	msh2	FALSE	CAN	JSY22	4	msh2-Rep4	TAA	nope	>1bp-ins	A/T-1	none	A/T-1	GTGGATAAACCAA	AAACCAA	ATT	ATT	T	none	T>none	T>none_ATT	A/T-1_AAACCAA	4	329	FALSE	FALSE
19_v.txt	33143	33143-Deletion-A--	Deletion	1	A	-	19	27802	0.0683404	37.3158	msh2	FALSE	CAN	JSY22	4	msh2-Rep4	CAA	nope	>1bp-ins	A/T-1	none	A/T-1	TAAACCAATGAAA	AATGAAA	GTT	GTT	T	none	T>none	T>none_GTT	A/T-1_AATGAAA	4	324	FALSE	FALSE
19_v.txt	33168	33168-Deletion-C--	Deletion	1	C	-	2	27801	0.007194	38	msh2	FALSE	CAN	JSY22	4	msh2-Rep4	ACC	nope	>1bp-ins	G/C-1	none	G/C-1	ATAGTACCACCAA	CCACCAA	TGG	ACC	C	none	nope	nope_ACC	G/C-1_CCACCAA	4	299	FALSE	FALSE
19_v.txt	33175	33175-Deletion-G--	Deletion	1	G	-	3	27797	0.0107925	37.3333	msh2	FALSE	CAN	JSY22	4	msh2-Rep4	AGG	nope	>1bp-ins	G/C-1	none	G/C-1	CACCAAGGGCAAT	GGGCAAT	TCC	TCC	C	none	C>none	C>none_TCC	G/C-1_GGGCAAT	4	292	FALSE	FALSE
19_v.txt	33303	33303-Deletion-A--	Deletion	1	A	-	11	25492	0.0431508	55.1818	msh2	FALSE	CAN	JSY22	4	msh2-Rep4	GAA	nope	>1bp-ins	A/T-1	none	A/T-1	GTCGGGAAAGAGC	AAAGAGC	CTT	CTT	T	none	T>none	T>none_CTT	A/T-1_AAAGAGC	4	164	FALSE	FALSE
19_v.txt	33474	33474-Deletion-C--	Deletion	1	C	-	73	25490	0.286387	30.0685	msh2	FALSE	CAN	JSY22	4	msh2-Rep4	GCC	nope	>1bp-ins	G/C-1	none	G/C-1	GCTATGCCTTTTT	CCTTTTT	CGG	GCC	C	none	nope	nope_GCC	G/C-1_CCTTTTT	4	N_A	FALSE	FALSE
24_v.txt	31723	31723-SNV-A-C	SNV	1	A	C	8	14060	0.056899	63.25	msh3	FALSE	CAN	JSY15	1	msh3-Rep1	CAA	A>C	G/C+1	A/T-1	TA>GC	TA>GC	TGTCCCAAAAAGT	AAAAAGT	GTT	GTT	T	G	T>G	T>G_GTT	TA>GC_AAAAAGT	6	1744	FALSE	FALSE
24_v.txt	31811	31811-SNV-A-C	SNV	1	A	C	1	14060	0.007112	63.9976	msh3	FALSE	CAN	JSY15	1	msh3-Rep1	TAA	A>C	G/C+1	A/T-1	TA>GC	TA>GC	CCAAATAAATCTG	AAATCTG	ATT	ATT	T	G	T>G	T>G_ATT	TA>GC_AAATCTG	6	1656	FALSE	FALSE
24_v.txt	31822	31822-SNV-T-G	SNV	1	T	G	8	14059	0.0569031	21.375	msh3	FALSE	CAN	JSY15	1	msh3-Rep1	CTG	T>G	G/C+1	A/T-1	TA>GC	TA>GC	TGCATCTGAATAT	TGAATAT	GAC	CTG	T	C	T>G	T>G_CTG	TA>GC_TGAATAT	6	1645	FALSE	FALSE
24_v.txt	31967	31967-SNV-A-C	SNV	1	A	C	82	30746	0.266701	32.1951	msh3	FALSE	CAN	JSY15	1	msh3-Rep1	AAT	A>C	G/C+1	A/T-1	TA>GC	TA>GC	CGCATAATAAGCC	ATAAGCC	TTA	TTA	T	G	T>G	T>G_TTA	TA>GC_ATAAGCC	6	1500	FALSE	FALSE
24_v.txt	31986	31986-SNV-A-C	SNV	1	A	C	582	30746	1.89293	52.7852	msh3	FALSE	CAN	JSY15	1	msh3-Rep1	TAA	A>C	G/C+1	A/T-1	TA>GC	TA>GC	GGCATTAATTTAG	AATTTAG	ATT	ATT	T	G	T>G	T>G_ATT	TA>GC_AATTTAG	6	1481	FALSE	FALSE
24_v.txt	32004	32004-SNV-A-C	SNV	1	A	C	41	30746	0.133351	47.0244	msh3	FALSE	CAN	JSY15	1	msh3-Rep1	TAA	A>C	G/C+1	A/T-1	TA>GC	TA>GC	AATGGTAACTCGT	AACTCGT	ATT	ATT	T	G	T>G	T>G_ATT	TA>GC_AACTCGT	6	1463	FALSE	FALSE
24_v.txt	32081	32081-SNV-A-C	SNV	1	A	C	2	30788	0.006496	35.5001	msh3	FALSE	CAN	JSY15	1	msh3-Rep1	CAA	A>C	G/C+1	A/T-1	TA>GC	TA>GC	CCATGCAAAAAAG	AAAAAAG	GTT	GTT	T	G	T>G	T>G_GTT	TA>GC_AAAAAAG	6	1386	FALSE	FALSE
24_v.txt	32109	32109-SNV-A-C	SNV	1	A	C	48	30788	0.155905	58.2708	msh3	FALSE	CAN	JSY15	1	msh3-Rep1	TAA	A>C	G/C+1	A/T-1	TA>GC	TA>GC	ATATTTAATAGCC	AATAGCC	ATT	ATT	T	G	T>G	T>G_ATT	TA>GC_AATAGCC	6	1358	FALSE	FALSE
24_v.txt	32226	32226-SNV-A-C	SNV	1	A	C	22	30787	0.0714587	35.5	msh3	FALSE	CAN	JSY15	1	msh3-Rep1	CAG	A>C	G/C+1	A/T-1	TA>GC	TA>GC	CTTGACAGGAATT	AGGAATT	GTC	GTC	T	G	T>G	T>G_GTC	TA>GC_AGGAATT	6	1241	FALSE	FALSE
24_v.txt	32237	32237-SNV-A-C	SNV	1	A	C	24	30784	0.0779626	34.9583	msh3	FALSE	CAN	JSY15	1	msh3-Rep1	GAG	A>C	G/C+1	A/T-1	TA>GC	TA>GC	TTTAGGAGCCAAC	AGCCAAC	CTC	CTC	T	G	T>G	T>G_CTC	TA>GC_AGCCAAC	6	1230	FALSE	FALSE
24_v.txt	32241	32241-SNV-A-C	SNV	1	A	C	9	30783	0.0292369	26.7778	msh3	FALSE	CAN	JSY15	1	msh3-Rep1	CAA	A>C	G/C+1	A/T-1	TA>GC	TA>GC	GGAGCCAACTTGT	AACTTGT	GTT	GTT	T	G	T>G	T>G_GTT	TA>GC_AACTTGT	6	1226	FALSE	FALSE
24_v.txt	32256	32256-SNV-A-C	SNV	1	A	C	31	35811	0.0865656	25.871	msh3	FALSE	CAN	JSY15	1	msh3-Rep1	TAG	A>C	G/C+1	A/T-1	TA>GC	TA>GC	TTTGATAGACCAA	AGACCAA	ATC	ATC	T	G	T>G	T>G_ATC	TA>GC_AGACCAA	6	1211	FALSE	FALSE
24_v.txt	32287	32287-SNV-T-G	SNV	1	T	G	11	36279	0.0303206	43.4545	msh3	FALSE	CAN	JSY15	1	msh3-Rep1	ATA	T>G	G/C+1	A/T-1	TA>GC	TA>GC	CGTAAATATTTGA	TATTTGA	TAT	ATA	T	C	T>G	T>G_ATA	TA>GC_TATTTGA	6	1180	FALSE	FALSE
24_v.txt	32290	32290-SNV-T-G	SNV	1	T	G	10	36279	0.0275642	56.4	msh3	FALSE	CAN	JSY15	1	msh3-Rep1	TTT	T>G	G/C+1	A/T-1	TA>GC	TA>GC	AAATATTTGAATT	TTGAATT	AAA	TTT	T	C	T>G	T>G_TTT	TA>GC_TTGAATT	6	1177	FALSE	FALSE
24_v.txt	32319	32319-SNV-A-C	SNV	1	A	C	36	36279	0.099231	53.25	msh3	FALSE	CAN	JSY15	1	msh3-Rep1	TAA	A>C	G/C+1	A/T-1	TA>GC	TA>GC	GTTGTTAAGATAA	AAGATAA	ATT	ATT	T	G	T>G	T>G_ATT	TA>GC_AAGATAA	6	1148	FALSE	FALSE
24_v.txt	32338	32338-SNV-T-G	SNV	1	T	G	4	36279	0.0110257	34.2521	msh3	FALSE	CAN	JSY15	1	msh3-Rep1	ATA	T>G	G/C+1	A/T-1	TA>GC	TA>GC	TGAAGATATGTGG	TATGTGG	TAT	ATA	T	C	T>G	T>G_ATA	TA>GC_TATGTGG	6	1129	FALSE	FALSE
24_v.txt	32352	32352-SNV-T-G	SNV	1	T	G	4	36277	0.0110263	48.2501	msh3	FALSE	CAN	JSY15	1	msh3-Rep1	CTT	T>G	G/C+1	A/T-1	TA>GC	TA>GC	AAAACCTTTGTAC	TTTGTAC	GAA	CTT	T	C	T>G	T>G_CTT	TA>GC_TTTGTAC	6	1115	FALSE	FALSE
24_v.txt	32441	32441-SNV-T-G	SNV	1	T	G	18	36279	0.0496155	56.8331	msh3	FALSE	CAN	JSY15	1	msh3-Rep1	CTA	T>G	G/C+1	A/T-1	TA>GC	TA>GC	TGGAACTAAAAGT	TAAAAGT	GAT	CTA	T	C	T>G	T>G_CTA	TA>GC_TAAAAGT	6	1026	FALSE	FALSE
24_v.txt	32445	32445-SNV-A-C	SNV	1	A	C	67	36279	0.18468	48.5821	msh3	FALSE	CAN	JSY15	1	msh3-Rep1	AAG	A>C	G/C+1	A/T-1	TA>GC	TA>GC	ACTAAAAGTCCAA	AGTCCAA	TTC	TTC	T	G	T>G	T>G_TTC	TA>GC_AGTCCAA	6	1022	FALSE	FALSE
24_v.txt	32472	32472-SNV-T-G	SNV	1	T	G	34	36279	0.0937181	53.6471	msh3	FALSE	CAN	JSY15	1	msh3-Rep1	GTA	T>G	G/C+1	A/T-1	TA>GC	TA>GC	CCAATGTAGAAGG	TAGAAGG	CAT	GTA	T	C	T>G	T>G_GTA	TA>GC_TAGAAGG	6	995	FALSE	FALSE
24_v.txt	32493	32493-SNV-A-C	SNV	1	A	C	8	36279	0.0220513	31.2501	msh3	FALSE	CAN	JSY15	1	msh3-Rep1	AAC	A>C	G/C+1	A/T-1	TA>GC	TA>GC	CGGAAAACAACTT	ACAACTT	TTG	TTG	T	G	T>G	T>G_TTG	TA>GC_ACAACTT	6	974	FALSE	FALSE
24_v.txt	32499	32499-SNV-T-G	SNV	1	T	G	2	36279	0.005513	28.5009	msh3	FALSE	CAN	JSY15	1	msh3-Rep1	TTT	T>G	G/C+1	A/T-1	TA>GC	TA>GC	ACAACTTTTTTGA	TTTTTGA	AAA	TTT	T	C	T>G	T>G_TTT	TA>GC_TTTTTGA	6	968	FALSE	FALSE
24_v.txt	32546	32546-SNV-A-C	SNV	1	A	C	4	36275	0.0110269	23.9989	msh3	FALSE	CAN	JSY15	1	msh3-Rep1	CAG	A>C	G/C+1	A/T-1	TA>GC	TA>GC	TTCACCAGCAGTG	AGCAGTG	GTC	GTC	T	G	T>G	T>G_GTC	TA>GC_AGCAGTG	6	921	FALSE	FALSE
24_v.txt	32581	32581-SNV-T-G	SNV	1	T	G	59	31991	0.184427	35.8814	msh3	FALSE	CAN	JSY15	1	msh3-Rep1	GTG	T>G	G/C+1	A/T-1	TA>GC	TA>GC	GAAATGTGAAGGC	TGAAGGC	CAC	GTG	T	C	T>G	T>G_GTG	TA>GC_TGAAGGC	6	886	FALSE	FALSE
24_v.txt	32584	32584-SNV-A-C	SNV	1	A	C	2	31991	0.006252	37.9994	msh3	FALSE	CAN	JSY15	1	msh3-Rep1	AAG	A>C	G/C+1	A/T-1	TA>GC	TA>GC	ATGTGAAGGCAGC	AGGCAGC	TTC	TTC	T	G	T>G	T>G_TTC	TA>GC_AGGCAGC	6	883	FALSE	FALSE
24_v.txt	32732	32732-SNV-A-C	SNV	1	A	C	10	32052	0.0311993	52.2	msh3	FALSE	CAN	JSY15	1	msh3-Rep1	AAC	A>C	G/C+1	A/T-1	TA>GC	TA>GC	ACAAAAACAGTAT	ACAGTAT	TTG	TTG	T	G	T>G	T>G_TTG	TA>GC_ACAGTAT	6	735	FALSE	FALSE
24_v.txt	32739	32739-SNV-A-C	SNV	1	A	C	35	32052	0.109198	58.3429	msh3	FALSE	CAN	JSY15	1	msh3-Rep1	TAT	A>C	G/C+1	A/T-1	TA>GC	TA>GC	CAGTATATTAGAA	ATTAGAA	ATA	ATA	T	G	T>G	T>G_ATA	TA>GC_ATTAGAA	6	728	FALSE	FALSE
24_v.txt	32763	32763-SNV-A-C	SNV	1	A	C	21	32052	0.0655185	49.4762	msh3	FALSE	CAN	JSY15	1	msh3-Rep1	AAC	A>C	G/C+1	A/T-1	TA>GC	TA>GC	GCTAAAACTTTGA	ACTTTGA	TTG	TTG	T	G	T>G	T>G_TTG	TA>GC_ACTTTGA	6	704	FALSE	FALSE
24_v.txt	32787	32787-SNV-T-G	SNV	1	T	G	23	32052	0.0717584	46.5217	msh3	FALSE	CAN	JSY15	1	msh3-Rep1	CTC	T>G	G/C+1	A/T-1	TA>GC	TA>GC	CAGAACTCGAATT	TCGAATT	GAG	CTC	T	C	T>G	T>G_CTC	TA>GC_TCGAATT	6	680	FALSE	FALSE
24_v.txt	32799	32799-SNV-T-G	SNV	1	T	G	10	32052	0.0311993	37.9022	msh3	FALSE	CAN	JSY15	1	msh3-Rep1	GTA	T>G	G/C+1	A/T-1	TA>GC	TA>GC	TCACCGTAATATT	TAATATT	CAT	GTA	T	C	T>G	T>G_GTA	TA>GC_TAATATT	6	668	FALSE	FALSE
24_v.txt	32800	32800-SNV-A-C	SNV	1	A	C	15	32052	0.046799	48.2661	msh3	FALSE	CAN	JSY15	1	msh3-Rep1	TAA	A>C	G/C+1	A/T-1	TA>GC	TA>GC	CACCGTAATATTT	AATATTT	ATT	ATT	T	G	T>G	T>G_ATT	TA>GC_AATATTT	6	667	FALSE	FALSE
24_v.txt	32801	32801-SNV-A-C	SNV	1	A	C	5	32052	0.0155997	47.7996	msh3	FALSE	CAN	JSY15	1	msh3-Rep1	AAT	A>C	G/C+1	A/T-1	TA>GC	TA>GC	ACCGTAATATTTG	ATATTTG	TTA	TTA	T	G	T>G	T>G_TTA	TA>GC_ATATTTG	6	666	FALSE	FALSE
24_v.txt	32810	32810-SNV-A-C	SNV	1	A	C	8	32052	0.0249594	44.375	msh3	FALSE	CAN	JSY15	1	msh3-Rep1	CAG	A>C	G/C+1	A/T-1	TA>GC	TA>GC	TTTGACAGGGAAC	AGGGAAC	GTC	GTC	T	G	T>G	T>G_GTC	TA>GC_AGGGAAC	6	657	FALSE	FALSE
24_v.txt	32842	32842-SNV-A-C	SNV	1	A	C	11	32052	0.0343192	35.5456	msh3	FALSE	CAN	JSY15	1	msh3-Rep1	CAA	A>C	G/C+1	A/T-1	TA>GC	TA>GC	TTACCCAAAAAAT	AAAAAAT	GTT	GTT	T	G	T>G	T>G_GTT	TA>GC_AAAAAAT	6	625	FALSE	FALSE
24_v.txt	32884	32884-SNV-A-C	SNV	1	A	C	9	29073	0.0309566	34.5526	msh3	FALSE	CAN	JSY15	1	msh3-Rep1	CAA	A>C	G/C+1	A/T-1	TA>GC	TA>GC	ACGTCCAAAATTG	AAAATTG	GTT	GTT	T	G	T>G	T>G_GTT	TA>GC_AAAATTG	6	583	FALSE	FALSE
24_v.txt	32915	32915-SNV-T-G	SNV	1	T	G	24	29073	0.0825508	35.7823	msh3	FALSE	CAN	JSY15	1	msh3-Rep1	GTT	T>G	G/C+1	A/T-1	TA>GC	TA>GC	ACTAAGTTCCAGG	TTCCAGG	CAA	GTT	T	C	T>G	T>G_GTT	TA>GC_TTCCAGG	6	552	FALSE	FALSE
24_v.txt	32919	32919-SNV-A-C	SNV	1	A	C	68	29073	0.233894	43.2647	msh3	FALSE	CAN	JSY15	1	msh3-Rep1	CAG	A>C	G/C+1	A/T-1	TA>GC	TA>GC	AGTTCCAGGGCAA	AGGGCAA	GTC	GTC	T	G	T>G	T>G_GTC	TA>GC_AGGGCAA	6	548	FALSE	FALSE
24_v.txt	32926	32926-SNV-A-C	SNV	1	A	C	220	29073	0.756716	48.1818	msh3	FALSE	CAN	JSY15	1	msh3-Rep1	AAA	A>C	G/C+1	A/T-1	TA>GC	TA>GC	GGGCAAAAGTGAT	AAGTGAT	TTT	TTT	T	G	T>G	T>G_TTT	TA>GC_AAGTGAT	6	541	FALSE	FALSE
24_v.txt	33039	33039-SNV-A-C	SNV	1	A	C	28	29074	0.096306	59.5357	msh3	FALSE	CAN	JSY15	1	msh3-Rep1	CAT	A>C	G/C+1	A/T-1	TA>GC	TA>GC	GTAGCCATTTCAC	ATTTCAC	GTA	GTA	T	G	T>G	T>G_GTA	TA>GC_ATTTCAC	6	428	FALSE	FALSE
24_v.txt	33126	33126-SNV-A-C	SNV	1	A	C	45	29074	0.154777	40.3553	msh3	FALSE	CAN	JSY15	1	msh3-Rep1	CAG	A>C	G/C+1	A/T-1	TA>GC	TA>GC	TTGGTCAGAGGTG	AGAGGTG	GTC	GTC	T	G	T>G	T>G_GTC	TA>GC_AGAGGTG	6	341	FALSE	FALSE
24_v.txt	33150	33150-SNV-A-C	SNV	1	A	C	15	29074	0.0515925	38	msh3	FALSE	CAN	JSY15	1	msh3-Rep1	AAG	A>C	G/C+1	A/T-1	TA>GC	TA>GC	ATGAAAAGACCTG	AGACCTG	TTC	TTC	T	G	T>G	T>G_TTC	TA>GC_AGACCTG	6	317	FALSE	FALSE
24_v.txt	33189	33189-SNV-A-C	SNV	1	A	C	9	24780	0.0363196	37.9991	msh3	FALSE	CAN	JSY15	1	msh3-Rep1	AAT	A>C	G/C+1	A/T-1	TA>GC	TA>GC	ATACCAATATGTC	ATATGTC	TTA	TTA	T	G	T>G	T>G_TTA	TA>GC_ATATGTC	6	278	FALSE	FALSE
24_v.txt	33204	33204-SNV-A-C	SNV	1	A	C	20	24799	0.0806484	27.5	msh3	FALSE	CAN	JSY15	1	msh3-Rep1	AAG	A>C	G/C+1	A/T-1	TA>GC	TA>GC	TGCTTAAGCTCTC	AGCTCTC	TTC	TTC	T	G	T>G	T>G_TTC	TA>GC_AGCTCTC	6	263	FALSE	FALSE
24_v.txt	33209	33209-SNV-T-G	SNV	1	T	G	12	24799	0.048389	39.9995	msh3	FALSE	CAN	JSY15	1	msh3-Rep1	CTC	T>G	G/C+1	A/T-1	TA>GC	TA>GC	AAGCTCTCTCTTC	TCTCTTC	GAG	CTC	T	C	T>G	T>G_CTC	TA>GC_TCTCTTC	6	258	FALSE	FALSE
24_v.txt	33255	33255-SNV-A-C	SNV	1	A	C	50	24839	0.201296	15.6005	msh3	FALSE	CAN	JSY15	1	msh3-Rep1	TAT	A>C	G/C+1	A/T-1	TA>GC	TA>GC	TCACCTATGCCAT	ATGCCAT	ATA	ATA	T	G	T>G	T>G_ATA	TA>GC_ATGCCAT	6	212	FALSE	FALSE
24_v.txt	33269	33269-SNV-A-C	SNV	1	A	C	174	24839	0.700511	15.7529	msh3	FALSE	CAN	JSY15	1	msh3-Rep1	TAG	A>C	G/C+1	A/T-1	TA>GC	TA>GC	CTCCATAGAGAAC	AGAGAAC	ATC	ATC	T	G	T>G	T>G_ATC	TA>GC_AGAGAAC	6	198	FALSE	FALSE
24_v.txt	33479	33479-SNV-T-G	SNV	1	T	G	5	24705	0.0202388	38	msh3	FALSE	CAN	JSY15	1	msh3-Rep1	TTT	T>G	G/C+1	A/T-1	TA>GC	TA>GC	GCCTTTTTTTTTT	TTTTTTT	AAA	TTT	T	C	T>G	T>G_TTT	TA>GC_TTTTTTT	6	N_A	FALSE	FALSE
24_v.txt	31812	31812-SNV-A-G	SNV	1	A	G	4	14060	0.0284495	28.2495	msh3	FALSE	CAN	JSY15	1	msh3-Rep1	AAA	A>G	G/C+1	A/T-1	TA>CG	TA>CG	CAAATAAATCTGC	AATCTGC	TTT	TTT	T	C	T>C	T>C_TTT	TA>CG_AATCTGC	6	1655	FALSE	FALSE
24_v.txt	31816	31816-SNV-T-C	SNV	1	T	C	3	14060	0.0213371	44.6666	msh3	FALSE	CAN	JSY15	1	msh3-Rep1	CTG	T>C	G/C+1	A/T-1	TA>CG	TA>CG	TAAATCTGCATCT	TGCATCT	GAC	CTG	T	G	T>C	T>C_CTG	TA>CG_TGCATCT	6	1651	FALSE	FALSE
24_v.txt	31822	31822-SNV-T-C	SNV	1	T	C	4	14059	0.0284515	50.75	msh3	FALSE	CAN	JSY15	1	msh3-Rep1	CTG	T>C	G/C+1	A/T-1	TA>CG	TA>CG	TGCATCTGAATAT	TGAATAT	GAC	CTG	T	G	T>C	T>C_CTG	TA>CG_TGAATAT	6	1645	FALSE	FALSE
24_v.txt	31923	31923-SNV-A-G	SNV	1	A	G	6	13964	0.0429676	28.6495	msh3	FALSE	CAN	JSY15	1	msh3-Rep1	GAA	A>G	G/C+1	A/T-1	TA>CG	TA>CG	GCCGTGAAACCTT	AAACCTT	CTT	CTT	T	C	T>C	T>C_CTT	TA>CG_AAACCTT	6	1544	FALSE	FALSE
24_v.txt	32065	32065-SNV-A-G	SNV	1	A	G	17	30787	0.0552181	61.8808	msh3	FALSE	CAN	JSY15	1	msh3-Rep1	GAG	A>G	G/C+1	A/T-1	TA>CG	TA>CG	AGATTGAGATAAA	AGATAAA	CTC	CTC	T	C	T>C	T>C_CTC	TA>CG_AGATAAA	6	1402	FALSE	FALSE
24_v.txt	32077	32077-SNV-A-G	SNV	1	A	G	60	30788	0.194881	61.2333	msh3	FALSE	CAN	JSY15	1	msh3-Rep1	CAT	A>G	G/C+1	A/T-1	TA>CG	TA>CG	ATAACCATGCAAA	ATGCAAA	GTA	GTA	T	C	T>C	T>C_GTA	TA>CG_ATGCAAA	6	1390	FALSE	FALSE
24_v.txt	32256	32256-SNV-A-G	SNV	1	A	G	22	35811	0.0614336	36.7727	msh3	FALSE	CAN	JSY15	1	msh3-Rep1	TAG	A>G	G/C+1	A/T-1	TA>CG	TA>CG	TTTGATAGACCAA	AGACCAA	ATC	ATC	T	C	T>C	T>C_ATC	TA>CG_AGACCAA	6	1211	FALSE	FALSE
24_v.txt	32262	32262-SNV-A-G	SNV	1	A	G	67	35829	0.186999	36.5373	msh3	FALSE	CAN	JSY15	1	msh3-Rep1	AAA	A>G	G/C+1	A/T-1	TA>CG	TA>CG	AGACCAAATAAAA	AATAAAA	TTT	TTT	T	C	T>C	T>C_TTT	TA>CG_AATAAAA	6	1205	FALSE	FALSE
24_v.txt	32275	32275-SNV-A-G	SNV	1	A	G	59	36279	0.162629	34.4063	msh3	FALSE	CAN	JSY15	1	msh3-Rep1	GAA	A>G	G/C+1	A/T-1	TA>CG	TA>CG	TACGGGAACCAAC	AACCAAC	CTT	CTT	T	C	T>C	T>C_CTT	TA>CG_AACCAAC	6	1192	FALSE	FALSE
24_v.txt	32295	32295-SNV-T-C	SNV	1	T	C	5	36279	0.0137821	40.0001	msh3	FALSE	CAN	JSY15	1	msh3-Rep1	ATT	T>C	G/C+1	A/T-1	TA>CG	TA>CG	TTTGAATTTGCGG	TTTGCGG	TAA	ATT	T	G	T>C	T>C_ATT	TA>CG_TTTGCGG	6	1172	FALSE	FALSE
24_v.txt	32337	32337-SNV-A-G	SNV	1	A	G	6	36279	0.0165385	41	msh3	FALSE	CAN	JSY15	1	msh3-Rep1	GAT	A>G	G/C+1	A/T-1	TA>CG	TA>CG	TTGAAGATATGTG	ATATGTG	CTA	CTA	T	C	T>C	T>C_CTA	TA>CG_ATATGTG	6	1130	FALSE	FALSE
24_v.txt	32352	32352-SNV-T-C	SNV	1	T	C	7	36277	0.019296	52.8304	msh3	FALSE	CAN	JSY15	1	msh3-Rep1	CTT	T>C	G/C+1	A/T-1	TA>CG	TA>CG	AAAACCTTTGTAC	TTTGTAC	GAA	CTT	T	G	T>C	T>C_CTT	TA>CG_TTTGTAC	6	1115	FALSE	FALSE
24_v.txt	32445	32445-SNV-A-G	SNV	1	A	G	54	36279	0.148846	50.2407	msh3	FALSE	CAN	JSY15	1	msh3-Rep1	AAG	A>G	G/C+1	A/T-1	TA>CG	TA>CG	ACTAAAAGTCCAA	AGTCCAA	TTC	TTC	T	C	T>C	T>C_TTC	TA>CG_AGTCCAA	6	1022	FALSE	FALSE
24_v.txt	32454	32454-SNV-A-G	SNV	1	A	G	9	36279	0.0248077	42.888	msh3	FALSE	CAN	JSY15	1	msh3-Rep1	GAA	A>G	G/C+1	A/T-1	TA>CG	TA>CG	CCAATGAATAATA	AATAATA	CTT	CTT	T	C	T>C	T>C_CTT	TA>CG_AATAATA	6	1013	FALSE	FALSE
24_v.txt	32459	32459-SNV-T-C	SNV	1	T	C	4	36279	0.0110257	57.4983	msh3	FALSE	CAN	JSY15	1	msh3-Rep1	ATA	T>C	G/C+1	A/T-1	TA>CG	TA>CG	GAATAATAGAGAG	TAGAGAG	TAT	ATA	T	G	T>C	T>C_ATA	TA>CG_TAGAGAG	6	1008	FALSE	FALSE
24_v.txt	32460	32460-SNV-A-G	SNV	1	A	G	17	36279	0.0468591	50.2942	msh3	FALSE	CAN	JSY15	1	msh3-Rep1	TAG	A>G	G/C+1	A/T-1	TA>CG	TA>CG	AATAATAGAGAGC	AGAGAGC	ATC	ATC	T	C	T>C	T>C_ATC	TA>CG_AGAGAGC	6	1007	FALSE	FALSE
24_v.txt	32472	32472-SNV-T-C	SNV	1	T	C	40	36279	0.110257	41.5	msh3	FALSE	CAN	JSY15	1	msh3-Rep1	GTA	T>C	G/C+1	A/T-1	TA>CG	TA>CG	CCAATGTAGAAGG	TAGAAGG	CAT	GTA	T	G	T>C	T>C_GTA	TA>CG_TAGAAGG	6	995	FALSE	FALSE
24_v.txt	32473	32473-SNV-A-G	SNV	1	A	G	14	36279	0.0385898	43.855	msh3	FALSE	CAN	JSY15	1	msh3-Rep1	TAG	A>G	G/C+1	A/T-1	TA>CG	TA>CG	CAATGTAGAAGGT	AGAAGGT	ATC	ATC	T	C	T>C	T>C_ATC	TA>CG_AGAAGGT	6	994	FALSE	FALSE
24_v.txt	32490	32490-SNV-A-G	SNV	1	A	G	51	36279	0.140577	45.5879	msh3	FALSE	CAN	JSY15	1	msh3-Rep1	GAA	A>G	G/C+1	A/T-1	TA>CG	TA>CG	ATACGGAAAACAA	AAAACAA	CTT	CTT	T	C	T>C	T>C_CTT	TA>CG_AAAACAA	6	977	FALSE	FALSE
24_v.txt	32498	32498-SNV-T-C	SNV	1	T	C	4	36279	0.0110257	28	msh3	FALSE	CAN	JSY15	1	msh3-Rep1	CTT	T>C	G/C+1	A/T-1	TA>CG	TA>CG	AACAACTTTTTTG	TTTTTTG	GAA	CTT	T	G	T>C	T>C_CTT	TA>CG_TTTTTTG	6	969	FALSE	FALSE
24_v.txt	32527	32527-SNV-T-C	SNV	1	T	C	8	36279	0.0220513	37.4999	msh3	FALSE	CAN	JSY15	1	msh3-Rep1	CTG	T>C	G/C+1	A/T-1	TA>CG	TA>CG	ATTTTCTGGGGTT	TGGGGTT	GAC	CTG	T	G	T>C	T>C_CTG	TA>CG_TGGGGTT	6	940	FALSE	FALSE
24_v.txt	32574	32574-SNV-T-C	SNV	1	T	C	30	31991	0.0937764	36.2653	msh3	FALSE	CAN	JSY15	1	msh3-Rep1	TTG	T>C	G/C+1	A/T-1	TA>CG	TA>CG	GTACCTTGAAATG	TGAAATG	AAC	TTG	T	G	T>C	T>C_TTG	TA>CG_TGAAATG	6	893	FALSE	FALSE
24_v.txt	32581	32581-SNV-T-C	SNV	1	T	C	19	31991	0.0593917	36.8421	msh3	FALSE	CAN	JSY15	1	msh3-Rep1	GTG	T>C	G/C+1	A/T-1	TA>CG	TA>CG	GAAATGTGAAGGC	TGAAGGC	CAC	GTG	T	G	T>C	T>C_GTG	TA>CG_TGAAGGC	6	886	FALSE	FALSE
24_v.txt	32680	32680-SNV-A-G	SNV	1	A	G	30	32052	0.0935979	59.4	msh3	FALSE	CAN	JSY15	1	msh3-Rep1	CAA	A>G	G/C+1	A/T-1	TA>CG	TA>CG	TTCTCCAATAACG	AATAACG	GTT	GTT	T	C	T>C	T>C_GTT	TA>CG_AATAACG	6	787	FALSE	FALSE
24_v.txt	32726	32726-SNV-A-G	SNV	1	A	G	1	32052	0.00312	63.9999	msh3	FALSE	CAN	JSY15	1	msh3-Rep1	TAC	A>G	G/C+1	A/T-1	TA>CG	TA>CG	AACCATACAAAAA	ACAAAAA	ATG	ATG	T	C	T>C	T>C_ATG	TA>CG_ACAAAAA	6	741	FALSE	FALSE
24_v.txt	32728	32728-SNV-A-G	SNV	1	A	G	7	32050	0.0218409	52.9971	msh3	FALSE	CAN	JSY15	1	msh3-Rep1	CAA	A>G	G/C+1	A/T-1	TA>CG	TA>CG	CCATACAAAAACA	AAAAACA	GTT	GTT	T	C	T>C	T>C_GTT	TA>CG_AAAAACA	6	739	FALSE	FALSE
24_v.txt	32761	32761-SNV-A-G	SNV	1	A	G	5	32052	0.0155997	38.8	msh3	FALSE	CAN	JSY15	1	msh3-Rep1	AAA	A>G	G/C+1	A/T-1	TA>CG	TA>CG	TGGCTAAAACTTT	AAACTTT	TTT	TTT	T	C	T>C	T>C_TTT	TA>CG_AAACTTT	6	706	FALSE	FALSE
24_v.txt	32767	32767-SNV-T-C	SNV	1	T	C	59	32052	0.184076	51.4912	msh3	FALSE	CAN	JSY15	1	msh3-Rep1	TTG	T>C	G/C+1	A/T-1	TA>CG	TA>CG	AAACTTTGATGGA	TGATGGA	AAC	TTG	T	G	T>C	T>C_TTG	TA>CG_TGATGGA	6	700	FALSE	FALSE
24_v.txt	32769	32769-SNV-A-G	SNV	1	A	G	16	32052	0.0499189	32.7974	msh3	FALSE	CAN	JSY15	1	msh3-Rep1	GAT	A>G	G/C+1	A/T-1	TA>CG	TA>CG	ACTTTGATGGAAG	ATGGAAG	CTA	CTA	T	C	T>C	T>C_CTA	TA>CG_ATGGAAG	6	698	FALSE	FALSE
24_v.txt	32787	32787-SNV-T-C	SNV	1	T	C	10	32052	0.0311993	40	msh3	FALSE	CAN	JSY15	1	msh3-Rep1	CTC	T>C	G/C+1	A/T-1	TA>CG	TA>CG	CAGAACTCGAATT	TCGAATT	GAG	CTC	T	G	T>C	T>C_CTC	TA>CG_TCGAATT	6	680	FALSE	FALSE
24_v.txt	32810	32810-SNV-A-G	SNV	1	A	G	18	32052	0.0561587	40.5	msh3	FALSE	CAN	JSY15	1	msh3-Rep1	CAG	A>G	G/C+1	A/T-1	TA>CG	TA>CG	TTTGACAGGGAAC	AGGGAAC	GTC	GTC	T	C	T>C	T>C_GTC	TA>CG_AGGGAAC	6	657	FALSE	FALSE
24_v.txt	32842	32842-SNV-A-G	SNV	1	A	G	11	32052	0.0343192	37.2727	msh3	FALSE	CAN	JSY15	1	msh3-Rep1	CAA	A>G	G/C+1	A/T-1	TA>CG	TA>CG	TTACCCAAAAAAT	AAAAAAT	GTT	GTT	T	C	T>C	T>C_GTT	TA>CG_AAAAAAT	6	625	FALSE	FALSE
24_v.txt	32913	32913-SNV-A-G	SNV	1	A	G	31	29073	0.106628	50.2258	msh3	FALSE	CAN	JSY15	1	msh3-Rep1	AAG	A>G	G/C+1	A/T-1	TA>CG	TA>CG	ACACTAAGTTCCA	AGTTCCA	TTC	TTC	T	C	T>C	T>C_TTC	TA>CG_AGTTCCA	6	554	FALSE	FALSE
24_v.txt	32916	32916-SNV-T-C	SNV	1	T	C	6	29073	0.0206377	15.5	msh3	FALSE	CAN	JSY15	1	msh3-Rep1	TTC	T>C	G/C+1	A/T-1	TA>CG	TA>CG	CTAAGTTCCAGGG	TCCAGGG	AAG	TTC	T	G	T>C	T>C_TTC	TA>CG_TCCAGGG	6	551	FALSE	FALSE
24_v.txt	32919	32919-SNV-A-G	SNV	1	A	G	22	29073	0.0756716	46.7273	msh3	FALSE	CAN	JSY15	1	msh3-Rep1	CAG	A>G	G/C+1	A/T-1	TA>CG	TA>CG	AGTTCCAGGGCAA	AGGGCAA	GTC	GTC	T	C	T>C	T>C_GTC	TA>CG_AGGGCAA	6	548	FALSE	FALSE
24_v.txt	32929	32929-SNV-T-C	SNV	1	T	C	29	29073	0.0997489	51.4828	msh3	FALSE	CAN	JSY15	1	msh3-Rep1	GTG	T>C	G/C+1	A/T-1	TA>CG	TA>CG	CAAAAGTGATTGC	TGATTGC	CAC	GTG	T	G	T>C	T>C_GTG	TA>CG_TGATTGC	6	538	FALSE	FALSE
24_v.txt	32994	32994-SNV-T-C	SNV	1	T	C	5	29072	0.0171987	61.9983	msh3	FALSE	CAN	JSY15	1	msh3-Rep1	TTG	T>C	G/C+1	A/T-1	TA>CG	TA>CG	AATCTTTGTGAGA	TGTGAGA	AAC	TTG	T	G	T>C	T>C_TTG	TA>CG_TGTGAGA	6	473	FALSE	FALSE
24_v.txt	33000	33000-SNV-A-G	SNV	1	A	G	5	29073	0.0171981	54.9998	msh3	FALSE	CAN	JSY15	1	msh3-Rep1	GAA	A>G	G/C+1	A/T-1	TA>CG	TA>CG	TGTGAGAAAACTG	AAAACTG	CTT	CTT	T	C	T>C	T>C_CTT	TA>CG_AAAACTG	6	467	FALSE	FALSE
24_v.txt	33005	33005-SNV-T-C	SNV	1	T	C	9	29071	0.0309587	56.333	msh3	FALSE	CAN	JSY15	1	msh3-Rep1	CTG	T>C	G/C+1	A/T-1	TA>CG	TA>CG	GAAAACTGTGAAA	TGTGAAA	GAC	CTG	T	G	T>C	T>C_CTG	TA>CG_TGTGAAA	6	462	FALSE	FALSE
24_v.txt	33065	33065-SNV-A-G	SNV	1	A	G	7	29073	0.0240773	52.5707	msh3	FALSE	CAN	JSY15	1	msh3-Rep1	AAT	A>G	G/C+1	A/T-1	TA>CG	TA>CG	GACAGAATATGCC	ATATGCC	TTA	TTA	T	C	T>C	T>C_TTA	TA>CG_ATATGCC	6	402	FALSE	FALSE
24_v.txt	33066	33066-SNV-T-C	SNV	1	T	C	2	29074	0.006879	50.9999	msh3	FALSE	CAN	JSY15	1	msh3-Rep1	ATA	T>C	G/C+1	A/T-1	TA>CG	TA>CG	ACAGAATATGCCA	TATGCCA	TAT	ATA	T	G	T>C	T>C_ATA	TA>CG_TATGCCA	6	401	FALSE	FALSE
24_v.txt	33074	33074-SNV-A-G	SNV	1	A	G	6	29073	0.0206377	28.8304	msh3	FALSE	CAN	JSY15	1	msh3-Rep1	AAG	A>G	G/C+1	A/T-1	TA>CG	TA>CG	TGCCAAAGAACCC	AGAACCC	TTC	TTC	T	C	T>C	T>C_TTC	TA>CG_AGAACCC	6	393	FALSE	FALSE
24_v.txt	33082	33082-SNV-T-C	SNV	1	T	C	7	29074	0.0240765	39.9994	msh3	FALSE	CAN	JSY15	1	msh3-Rep1	ATA	T>C	G/C+1	A/T-1	TA>CG	TA>CG	AACCCATAAATAA	TAAATAA	TAT	ATA	T	G	T>C	T>C_ATA	TA>CG_TAAATAA	6	385	FALSE	FALSE
24_v.txt	33083	33083-SNV-A-G	SNV	1	A	G	5	29074	0.0171975	42.7973	msh3	FALSE	CAN	JSY15	1	msh3-Rep1	TAA	A>G	G/C+1	A/T-1	TA>CG	TA>CG	ACCCATAAATAAA	AAATAAA	ATT	ATT	T	C	T>C	T>C_ATT	TA>CG_AAATAAA	6	384	FALSE	FALSE
24_v.txt	33092	33092-SNV-T-C	SNV	1	T	C	4	29074	0.013758	57.2445	msh3	FALSE	CAN	JSY15	1	msh3-Rep1	ATG	T>C	G/C+1	A/T-1	TA>CG	TA>CG	TAAATATGATATA	TGATATA	TAC	ATG	T	G	T>C	T>C_ATG	TA>CG_TGATATA	6	375	FALSE	FALSE
24_v.txt	33126	33126-SNV-A-G	SNV	1	A	G	106	29074	0.364587	42.4432	msh3	FALSE	CAN	JSY15	1	msh3-Rep1	CAG	A>G	G/C+1	A/T-1	TA>CG	TA>CG	TTGGTCAGAGGTG	AGAGGTG	GTC	GTC	T	C	T>C	T>C_GTC	TA>CG_AGAGGTG	6	341	FALSE	FALSE
24_v.txt	33150	33150-SNV-A-G	SNV	1	A	G	31	29074	0.106624	36.0645	msh3	FALSE	CAN	JSY15	1	msh3-Rep1	AAG	A>G	G/C+1	A/T-1	TA>CG	TA>CG	ATGAAAAGACCTG	AGACCTG	TTC	TTC	T	C	T>C	T>C_TTC	TA>CG_AGACCTG	6	317	FALSE	FALSE
24_v.txt	33157	33157-SNV-T-C	SNV	1	T	C	13	29074	0.0447135	36.8462	msh3	FALSE	CAN	JSY15	1	msh3-Rep1	GTA	T>C	G/C+1	A/T-1	TA>CG	TA>CG	GACCTGTACCAAT	TACCAAT	CAT	GTA	T	G	T>C	T>C_GTA	TA>CG_TACCAAT	6	310	FALSE	FALSE
24_v.txt	33174	33174-SNV-A-G	SNV	1	A	G	51	29016	0.175765	37.0588	msh3	FALSE	CAN	JSY15	1	msh3-Rep1	AAG	A>G	G/C+1	A/T-1	TA>CG	TA>CG	CCACCAAGGGCAA	AGGGCAA	TTC	TTC	T	C	T>C	T>C_TTC	TA>CG_AGGGCAA	6	293	FALSE	FALSE
24_v.txt	33204	33204-SNV-A-G	SNV	1	A	G	29	24799	0.11694	35.1724	msh3	FALSE	CAN	JSY15	1	msh3-Rep1	AAG	A>G	G/C+1	A/T-1	TA>CG	TA>CG	TGCTTAAGCTCTC	AGCTCTC	TTC	TTC	T	C	T>C	T>C_TTC	TA>CG_AGCTCTC	6	263	FALSE	FALSE
24_v.txt	33207	33207-SNV-T-C	SNV	1	T	C	15	24799	0.0604863	19.2666	msh3	FALSE	CAN	JSY15	1	msh3-Rep1	CTC	T>C	G/C+1	A/T-1	TA>CG	TA>CG	TTAAGCTCTCTCT	TCTCTCT	GAG	CTC	T	G	T>C	T>C_CTC	TA>CG_TCTCTCT	6	260	FALSE	FALSE
24_v.txt	33211	33211-SNV-T-C	SNV	1	T	C	32	24799	0.129037	40.0624	msh3	FALSE	CAN	JSY15	1	msh3-Rep1	CTC	T>C	G/C+1	A/T-1	TA>CG	TA>CG	GCTCTCTCTTCAC	TCTTCAC	GAG	CTC	T	G	T>C	T>C_CTC	TA>CG_TCTTCAC	6	256	FALSE	FALSE
24_v.txt	33423	33423-SNV-A-G	SNV	1	A	G	4	24835	0.0161063	21.7499	msh3	FALSE	CAN	JSY15	1	msh3-Rep1	CAT	A>G	G/C+1	A/T-1	TA>CG	TA>CG	TTGTACATATGCT	ATATGCT	GTA	GTA	T	C	T>C	T>C_GTA	TA>CG_ATATGCT	6	44	FALSE	FALSE
24_v.txt	33424	33424-SNV-T-C	SNV	1	T	C	8	24835	0.0322126	48.7481	msh3	FALSE	CAN	JSY15	1	msh3-Rep1	ATA	T>C	G/C+1	A/T-1	TA>CG	TA>CG	TGTACATATGCTT	TATGCTT	TAT	ATA	T	G	T>C	T>C_ATA	TA>CG_TATGCTT	6	43	FALSE	FALSE
24_v.txt	31663	31663-SNV-A-T	SNV	1	A	T	68	14060	0.483642	17.0882	msh3	FALSE	CAN	JSY15	1	msh3-Rep1	GAA	A>T	A/T+1	A/T-1	TA>AT	TA>AT	GCGTGGAAATGTG	AAATGTG	CTT	CTT	T	A	T>A	T>A_CTT	TA>AT_AAATGTG	6	1804	FALSE	FALSE
24_v.txt	31813	31813-SNV-A-T	SNV	1	A	T	3	14057	0.0213417	31.3318	msh3	FALSE	CAN	JSY15	1	msh3-Rep1	AAT	A>T	A/T+1	A/T-1	TA>AT	TA>AT	AAATAAATCTGCA	ATCTGCA	TTA	TTA	T	A	T>A	T>A_TTA	TA>AT_ATCTGCA	6	1654	FALSE	FALSE
24_v.txt	31816	31816-SNV-T-A	SNV	1	T	A	11	14060	0.0782361	58.362	msh3	FALSE	CAN	JSY15	1	msh3-Rep1	CTG	T>A	A/T+1	A/T-1	TA>AT	TA>AT	TAAATCTGCATCT	TGCATCT	GAC	CTG	T	T	T>A	T>A_CTG	TA>AT_TGCATCT	6	1651	FALSE	FALSE
24_v.txt	31819	31819-SNV-A-T	SNV	1	A	T	1	14060	0.007112	63.9988	msh3	FALSE	CAN	JSY15	1	msh3-Rep1	CAT	A>T	A/T+1	A/T-1	TA>AT	TA>AT	ATCTGCATCTGAA	ATCTGAA	GTA	GTA	T	A	T>A	T>A_GTA	TA>AT_ATCTGAA	6	1648	FALSE	FALSE
24_v.txt	31820	31820-SNV-T-A	SNV	1	T	A	5	14060	0.0355619	53.3968	msh3	FALSE	CAN	JSY15	1	msh3-Rep1	ATC	T>A	A/T+1	A/T-1	TA>AT	TA>AT	TCTGCATCTGAAT	TCTGAAT	TAG	ATC	T	T	T>A	T>A_ATC	TA>AT_TCTGAAT	6	1647	FALSE	FALSE
24_v.txt	31822	31822-SNV-T-A	SNV	1	T	A	7	14059	0.0497902	48.4286	msh3	FALSE	CAN	JSY15	1	msh3-Rep1	CTG	T>A	A/T+1	A/T-1	TA>AT	TA>AT	TGCATCTGAATAT	TGAATAT	GAC	CTG	T	T	T>A	T>A_CTG	TA>AT_TGAATAT	6	1645	FALSE	FALSE
24_v.txt	31906	31906-SNV-T-A	SNV	1	T	A	11	13964	0.078774	38	msh3	FALSE	CAN	JSY15	1	msh3-Rep1	TTT	T>A	A/T+1	A/T-1	TA>AT	TA>AT	TGAATTTTGGTGC	TTGGTGC	AAA	TTT	T	T	T>A	T>A_TTT	TA>AT_TTGGTGC	6	1561	FALSE	FALSE
24_v.txt	31967	31967-SNV-A-T	SNV	1	A	T	60	30746	0.195147	36.3	msh3	FALSE	CAN	JSY15	1	msh3-Rep1	AAT	A>T	A/T+1	A/T-1	TA>AT	TA>AT	CGCATAATAAGCC	ATAAGCC	TTA	TTA	T	A	T>A	T>A_TTA	TA>AT_ATAAGCC	6	1500	FALSE	FALSE
24_v.txt	32007	32007-SNV-T-A	SNV	1	T	A	6	30746	0.0195147	57.2957	msh3	FALSE	CAN	JSY15	1	msh3-Rep1	CTC	T>A	A/T+1	A/T-1	TA>AT	TA>AT	GGTAACTCGTCAC	TCGTCAC	GAG	CTC	T	T	T>A	T>A_CTC	TA>AT_TCGTCAC	6	1460	FALSE	FALSE
24_v.txt	32034	32034-SNV-A-T	SNV	1	A	T	20	30774	0.0649899	57.8	msh3	FALSE	CAN	JSY15	1	msh3-Rep1	CAA	A>T	A/T+1	A/T-1	TA>AT	TA>AT	TATTTCAAAGCTT	AAAGCTT	GTT	GTT	T	A	T>A	T>A_GTT	TA>AT_AAAGCTT	6	1433	FALSE	FALSE
24_v.txt	32050	32050-SNV-T-A	SNV	1	T	A	25	30788	0.0812005	57.36	msh3	FALSE	CAN	JSY15	1	msh3-Rep1	CTG	T>A	A/T+1	A/T-1	TA>AT	TA>AT	TAAATCTGATGTG	TGATGTG	GAC	CTG	T	T	T>A	T>A_CTG	TA>AT_TGATGTG	6	1417	FALSE	FALSE
24_v.txt	32068	32068-SNV-T-A	SNV	1	T	A	5	30788	0.0162401	60.3985	msh3	FALSE	CAN	JSY15	1	msh3-Rep1	ATA	T>A	A/T+1	A/T-1	TA>AT	TA>AT	TTGAGATAAATAA	TAAATAA	TAT	ATA	T	T	T>A	T>A_ATA	TA>AT_TAAATAA	6	1399	FALSE	FALSE
24_v.txt	32094	32094-SNV-A-T	SNV	1	A	T	16	30788	0.0519683	59.6243	msh3	FALSE	CAN	JSY15	1	msh3-Rep1	AAC	A>T	A/T+1	A/T-1	TA>AT	TA>AT	CCTGCAACACCAG	ACACCAG	TTG	TTG	T	A	T>A	T>A_TTG	TA>AT_ACACCAG	6	1373	FALSE	FALSE
24_v.txt	32109	32109-SNV-A-T	SNV	1	A	T	19	30788	0.0617124	57.6316	msh3	FALSE	CAN	JSY15	1	msh3-Rep1	TAA	A>T	A/T+1	A/T-1	TA>AT	TA>AT	ATATTTAATAGCC	AATAGCC	ATT	ATT	T	A	T>A	T>A_ATT	TA>AT_AATAGCC	6	1358	FALSE	FALSE
24_v.txt	32160	32160-SNV-A-T	SNV	1	A	T	46	30788	0.149409	48.6957	msh3	FALSE	CAN	JSY15	1	msh3-Rep1	CAA	A>T	A/T+1	A/T-1	TA>AT	TA>AT	TAAGCCAAAGCGC	AAAGCGC	GTT	GTT	T	A	T>A	T>A_GTT	TA>AT_AAAGCGC	6	1307	FALSE	FALSE
24_v.txt	32233	32233-SNV-T-A	SNV	1	T	A	60	30787	0.194887	27.4667	msh3	FALSE	CAN	JSY15	1	msh3-Rep1	TTA	T>A	A/T+1	A/T-1	TA>AT	TA>AT	GGAATTTAGGAGC	TAGGAGC	AAT	TTA	T	T	T>A	T>A_TTA	TA>AT_TAGGAGC	6	1234	FALSE	FALSE
24_v.txt	32241	32241-SNV-A-T	SNV	1	A	T	62	30783	0.20141	34.4355	msh3	FALSE	CAN	JSY15	1	msh3-Rep1	CAA	A>T	A/T+1	A/T-1	TA>AT	TA>AT	GGAGCCAACTTGT	AACTTGT	GTT	GTT	T	A	T>A	T>A_GTT	TA>AT_AACTTGT	6	1226	FALSE	FALSE
24_v.txt	32275	32275-SNV-A-T	SNV	1	A	T	6	36279	0.0165385	28.6653	msh3	FALSE	CAN	JSY15	1	msh3-Rep1	GAA	A>T	A/T+1	A/T-1	TA>AT	TA>AT	TACGGGAACCAAC	AACCAAC	CTT	CTT	T	A	T>A	T>A_CTT	TA>AT_AACCAAC	6	1192	FALSE	FALSE
24_v.txt	32295	32295-SNV-T-A	SNV	1	T	A	3	36279	0.008269	15.6667	msh3	FALSE	CAN	JSY15	1	msh3-Rep1	ATT	T>A	A/T+1	A/T-1	TA>AT	TA>AT	TTTGAATTTGCGG	TTTGCGG	TAA	ATT	T	T	T>A	T>A_ATT	TA>AT_TTTGCGG	6	1172	FALSE	FALSE
24_v.txt	32310	32310-SNV-A-T	SNV	1	A	T	23	36279	0.0633976	53.4348	msh3	FALSE	CAN	JSY15	1	msh3-Rep1	AAT	A>T	A/T+1	A/T-1	TA>AT	TA>AT	GAAATAATGGTTG	ATGGTTG	TTA	TTA	T	A	T>A	T>A_TTA	TA>AT_ATGGTTG	6	1157	FALSE	FALSE
24_v.txt	32314	32314-SNV-T-A	SNV	1	T	A	9	36279	0.0248077	46.2191	msh3	FALSE	CAN	JSY15	1	msh3-Rep1	GTT	T>A	A/T+1	A/T-1	TA>AT	TA>AT	TAATGGTTGTTAA	TTGTTAA	CAA	GTT	T	T	T>A	T>A_GTT	TA>AT_TTGTTAA	6	1153	FALSE	FALSE
24_v.txt	32315	32315-SNV-T-A	SNV	1	T	A	7	36279	0.0192949	43.4249	msh3	FALSE	CAN	JSY15	1	msh3-Rep1	TTG	T>A	A/T+1	A/T-1	TA>AT	TA>AT	AATGGTTGTTAAG	TGTTAAG	AAC	TTG	T	T	T>A	T>A_TTG	TA>AT_TGTTAAG	6	1152	FALSE	FALSE
24_v.txt	32337	32337-SNV-A-T	SNV	1	A	T	5	36279	0.0137821	49.3998	msh3	FALSE	CAN	JSY15	1	msh3-Rep1	GAT	A>T	A/T+1	A/T-1	TA>AT	TA>AT	TTGAAGATATGTG	ATATGTG	CTA	CTA	T	A	T>A	T>A_CTA	TA>AT_ATATGTG	6	1130	FALSE	FALSE
24_v.txt	32353	32353-SNV-T-A	SNV	1	T	A	27	36279	0.0744232	59.5251	msh3	FALSE	CAN	JSY15	1	msh3-Rep1	TTT	T>A	A/T+1	A/T-1	TA>AT	TA>AT	AAACCTTTGTACC	TTGTACC	AAA	TTT	T	T	T>A	T>A_TTT	TA>AT_TTGTACC	6	1114	FALSE	FALSE
24_v.txt	32377	32377-SNV-T-A	SNV	1	T	A	3	36272	0.008271	63.9876	msh3	FALSE	CAN	JSY15	1	msh3-Rep1	ATA	T>A	A/T+1	A/T-1	TA>AT	TA>AT	TAGCAATAATAAA	TAATAAA	TAT	ATA	T	T	T>A	T>A_ATA	TA>AT_TAATAAA	6	1090	FALSE	FALSE
24_v.txt	32445	32445-SNV-A-T	SNV	1	A	T	16	36279	0.0441026	52.375	msh3	FALSE	CAN	JSY15	1	msh3-Rep1	AAG	A>T	A/T+1	A/T-1	TA>AT	TA>AT	ACTAAAAGTCCAA	AGTCCAA	TTC	TTC	T	A	T>A	T>A_TTC	TA>AT_AGTCCAA	6	1022	FALSE	FALSE
24_v.txt	32456	32456-SNV-T-A	SNV	1	T	A	4	36279	0.0110257	44.4995	msh3	FALSE	CAN	JSY15	1	msh3-Rep1	ATA	T>A	A/T+1	A/T-1	TA>AT	TA>AT	AATGAATAATAGA	TAATAGA	TAT	ATA	T	T	T>A	T>A_ATA	TA>AT_TAATAGA	6	1011	FALSE	FALSE
24_v.txt	32472	32472-SNV-T-A	SNV	1	T	A	5	36279	0.0137821	52.6	msh3	FALSE	CAN	JSY15	1	msh3-Rep1	GTA	T>A	A/T+1	A/T-1	TA>AT	TA>AT	CCAATGTAGAAGG	TAGAAGG	CAT	GTA	T	T	T>A	T>A_GTA	TA>AT_TAGAAGG	6	995	FALSE	FALSE
24_v.txt	32493	32493-SNV-A-T	SNV	1	A	T	8	36279	0.0220513	45.8731	msh3	FALSE	CAN	JSY15	1	msh3-Rep1	AAC	A>T	A/T+1	A/T-1	TA>AT	TA>AT	CGGAAAACAACTT	ACAACTT	TTG	TTG	T	A	T>A	T>A_TTG	TA>AT_ACAACTT	6	974	FALSE	FALSE
24_v.txt	32498	32498-SNV-T-A	SNV	1	T	A	3	36279	0.008269	28.9999	msh3	FALSE	CAN	JSY15	1	msh3-Rep1	CTT	T>A	A/T+1	A/T-1	TA>AT	TA>AT	AACAACTTTTTTG	TTTTTTG	GAA	CTT	T	T	T>A	T>A_CTT	TA>AT_TTTTTTG	6	969	FALSE	FALSE
24_v.txt	32527	32527-SNV-T-A	SNV	1	T	A	27	36279	0.0744232	41.3674	msh3	FALSE	CAN	JSY15	1	msh3-Rep1	CTG	T>A	A/T+1	A/T-1	TA>AT	TA>AT	ATTTTCTGGGGTT	TGGGGTT	GAC	CTG	T	T	T>A	T>A_CTG	TA>AT_TGGGGTT	6	940	FALSE	FALSE
24_v.txt	32565	32565-SNV-T-A	SNV	1	T	A	18	31967	0.0563081	37.0538	msh3	FALSE	CAN	JSY15	1	msh3-Rep1	TTC	T>A	A/T+1	A/T-1	TA>AT	TA>AT	ACTAGTTCAGTAC	TCAGTAC	AAG	TTC	T	T	T>A	T>A_TTC	TA>AT_TCAGTAC	6	902	FALSE	FALSE
24_v.txt	32581	32581-SNV-T-A	SNV	1	T	A	8	31991	0.025007	35.375	msh3	FALSE	CAN	JSY15	1	msh3-Rep1	GTG	T>A	A/T+1	A/T-1	TA>AT	TA>AT	GAAATGTGAAGGC	TGAAGGC	CAC	GTG	T	T	T>A	T>A_GTG	TA>AT_TGAAGGC	6	886	FALSE	FALSE
24_v.txt	32584	32584-SNV-A-T	SNV	1	A	T	8	31991	0.025007	34.6228	msh3	FALSE	CAN	JSY15	1	msh3-Rep1	AAG	A>T	A/T+1	A/T-1	TA>AT	TA>AT	ATGTGAAGGCAGC	AGGCAGC	TTC	TTC	T	A	T>A	T>A_TTC	TA>AT_AGGCAGC	6	883	FALSE	FALSE
24_v.txt	32598	32598-SNV-A-T	SNV	1	A	T	10	31991	0.0312588	47.9	msh3	FALSE	CAN	JSY15	1	msh3-Rep1	CAA	A>T	A/T+1	A/T-1	TA>AT	TA>AT	TTAATCAAAGAGG	AAAGAGG	GTT	GTT	T	A	T>A	T>A_GTT	TA>AT_AAAGAGG	6	869	FALSE	FALSE
24_v.txt	32606	32606-SNV-A-T	SNV	1	A	T	20	31991	0.0625176	37.55	msh3	FALSE	CAN	JSY15	1	msh3-Rep1	AAA	A>T	A/T+1	A/T-1	TA>AT	TA>AT	AGAGGAAACCCAA	AACCCAA	TTT	TTT	T	A	T>A	T>A_TTT	TA>AT_AACCCAA	6	861	FALSE	FALSE
24_v.txt	32680	32680-SNV-A-T	SNV	1	A	T	16	32052	0.0499189	60.375	msh3	FALSE	CAN	JSY15	1	msh3-Rep1	CAA	A>T	A/T+1	A/T-1	TA>AT	TA>AT	TTCTCCAATAACG	AATAACG	GTT	GTT	T	A	T>A	T>A_GTT	TA>AT_AATAACG	6	787	FALSE	FALSE
24_v.txt	32726	32726-SNV-A-T	SNV	1	A	T	33	32052	0.102958	58.0573	msh3	FALSE	CAN	JSY15	1	msh3-Rep1	TAC	A>T	A/T+1	A/T-1	TA>AT	TA>AT	AACCATACAAAAA	ACAAAAA	ATG	ATG	T	A	T>A	T>A_ATG	TA>AT_ACAAAAA	6	741	FALSE	FALSE
24_v.txt	32736	32736-SNV-T-A	SNV	1	T	A	8	32049	0.0249618	60.3743	msh3	FALSE	CAN	JSY15	1	msh3-Rep1	GTA	T>A	A/T+1	A/T-1	TA>AT	TA>AT	AAACAGTATATTA	TATATTA	CAT	GTA	T	T	T>A	T>A_GTA	TA>AT_TATATTA	6	731	FALSE	FALSE
24_v.txt	32761	32761-SNV-A-T	SNV	1	A	T	1	32052	0.00312	63.9999	msh3	FALSE	CAN	JSY15	1	msh3-Rep1	AAA	A>T	A/T+1	A/T-1	TA>AT	TA>AT	TGGCTAAAACTTT	AAACTTT	TTT	TTT	T	A	T>A	T>A_TTT	TA>AT_AAACTTT	6	706	FALSE	FALSE
24_v.txt	32763	32763-SNV-A-T	SNV	1	A	T	37	32052	0.115437	51.8378	msh3	FALSE	CAN	JSY15	1	msh3-Rep1	AAC	A>T	A/T+1	A/T-1	TA>AT	TA>AT	GCTAAAACTTTGA	ACTTTGA	TTG	TTG	T	A	T>A	T>A_TTG	TA>AT_ACTTTGA	6	704	FALSE	FALSE
24_v.txt	32767	32767-SNV-T-A	SNV	1	T	A	38	32052	0.118557	48.7847	msh3	FALSE	CAN	JSY15	1	msh3-Rep1	TTG	T>A	A/T+1	A/T-1	TA>AT	TA>AT	AAACTTTGATGGA	TGATGGA	AAC	TTG	T	T	T>A	T>A_TTG	TA>AT_TGATGGA	6	700	FALSE	FALSE
24_v.txt	32787	32787-SNV-T-A	SNV	1	T	A	15	32052	0.046799	38.9333	msh3	FALSE	CAN	JSY15	1	msh3-Rep1	CTC	T>A	A/T+1	A/T-1	TA>AT	TA>AT	CAGAACTCGAATT	TCGAATT	GAG	CTC	T	T	T>A	T>A_CTC	TA>AT_TCGAATT	6	680	FALSE	FALSE
24_v.txt	32801	32801-SNV-A-T	SNV	1	A	T	32	32052	0.0998378	46.6836	msh3	FALSE	CAN	JSY15	1	msh3-Rep1	AAT	A>T	A/T+1	A/T-1	TA>AT	TA>AT	ACCGTAATATTTG	ATATTTG	TTA	TTA	T	A	T>A	T>A_TTA	TA>AT_ATATTTG	6	666	FALSE	FALSE
24_v.txt	32810	32810-SNV-A-T	SNV	1	A	T	8	32052	0.0249594	49	msh3	FALSE	CAN	JSY15	1	msh3-Rep1	CAG	A>T	A/T+1	A/T-1	TA>AT	TA>AT	TTTGACAGGGAAC	AGGGAAC	GTC	GTC	T	A	T>A	T>A_GTC	TA>AT_AGGGAAC	6	657	FALSE	FALSE
24_v.txt	32916	32916-SNV-T-A	SNV	1	T	A	94	29073	0.323324	54.137	msh3	FALSE	CAN	JSY15	1	msh3-Rep1	TTC	T>A	A/T+1	A/T-1	TA>AT	TA>AT	CTAAGTTCCAGGG	TCCAGGG	AAG	TTC	T	T	T>A	T>A_TTC	TA>AT_TCCAGGG	6	551	FALSE	FALSE
24_v.txt	32929	32929-SNV-T-A	SNV	1	T	A	7	29073	0.0240773	45.5714	msh3	FALSE	CAN	JSY15	1	msh3-Rep1	GTG	T>A	A/T+1	A/T-1	TA>AT	TA>AT	CAAAAGTGATTGC	TGATTGC	CAC	GTG	T	T	T>A	T>A_GTG	TA>AT_TGATTGC	6	538	FALSE	FALSE
24_v.txt	33000	33000-SNV-A-T	SNV	1	A	T	4	29073	0.0137585	61.249	msh3	FALSE	CAN	JSY15	1	msh3-Rep1	GAA	A>T	A/T+1	A/T-1	TA>AT	TA>AT	TGTGAGAAAACTG	AAAACTG	CTT	CTT	T	A	T>A	T>A_CTT	TA>AT_AAAACTG	6	467	FALSE	FALSE
24_v.txt	33005	33005-SNV-T-A	SNV	1	T	A	3	29071	0.0103196	63.9955	msh3	FALSE	CAN	JSY15	1	msh3-Rep1	CTG	T>A	A/T+1	A/T-1	TA>AT	TA>AT	GAAAACTGTGAAA	TGTGAAA	GAC	CTG	T	T	T>A	T>A_CTG	TA>AT_TGTGAAA	6	462	FALSE	FALSE
24_v.txt	33048	33048-SNV-A-T	SNV	1	A	T	40	29074	0.13758	57.125	msh3	FALSE	CAN	JSY15	1	msh3-Rep1	CAA	A>T	A/T+1	A/T-1	TA>AT	TA>AT	TCACCCAAGGACT	AAGGACT	GTT	GTT	T	A	T>A	T>A_GTT	TA>AT_AAGGACT	6	419	FALSE	FALSE
24_v.txt	33065	33065-SNV-A-T	SNV	1	A	T	13	29073	0.044715	46.8431	msh3	FALSE	CAN	JSY15	1	msh3-Rep1	AAT	A>T	A/T+1	A/T-1	TA>AT	TA>AT	GACAGAATATGCC	ATATGCC	TTA	TTA	T	A	T>A	T>A_TTA	TA>AT_ATATGCC	6	402	FALSE	FALSE
24_v.txt	33066	33066-SNV-T-A	SNV	1	T	A	3	29074	0.0103185	30.6665	msh3	FALSE	CAN	JSY15	1	msh3-Rep1	ATA	T>A	A/T+1	A/T-1	TA>AT	TA>AT	ACAGAATATGCCA	TATGCCA	TAT	ATA	T	T	T>A	T>A_ATA	TA>AT_TATGCCA	6	401	FALSE	FALSE
24_v.txt	33082	33082-SNV-T-A	SNV	1	T	A	12	29074	0.041274	41.4122	msh3	FALSE	CAN	JSY15	1	msh3-Rep1	ATA	T>A	A/T+1	A/T-1	TA>AT	TA>AT	AACCCATAAATAA	TAAATAA	TAT	ATA	T	T	T>A	T>A_ATA	TA>AT_TAAATAA	6	385	FALSE	FALSE
24_v.txt	33094	33094-SNV-A-T	SNV	1	A	T	4	29074	0.013758	34.9997	msh3	FALSE	CAN	JSY15	1	msh3-Rep1	GAT	A>T	A/T+1	A/T-1	TA>AT	TA>AT	AATATGATATAAG	ATATAAG	CTA	CTA	T	A	T>A	T>A_CTA	TA>AT_ATATAAG	6	373	FALSE	FALSE
24_v.txt	33095	33095-SNV-T-A	SNV	1	T	A	5	29074	0.0171975	37.7974	msh3	FALSE	CAN	JSY15	1	msh3-Rep1	ATA	T>A	A/T+1	A/T-1	TA>AT	TA>AT	ATATGATATAAGA	TATAAGA	TAT	ATA	T	T	T>A	T>A_ATA	TA>AT_TATAAGA	6	372	FALSE	FALSE
24_v.txt	33150	33150-SNV-A-T	SNV	1	A	T	5	29074	0.0171975	37.2	msh3	FALSE	CAN	JSY15	1	msh3-Rep1	AAG	A>T	A/T+1	A/T-1	TA>AT	TA>AT	ATGAAAAGACCTG	AGACCTG	TTC	TTC	T	A	T>A	T>A_TTC	TA>AT_AGACCTG	6	317	FALSE	FALSE
24_v.txt	33157	33157-SNV-T-A	SNV	1	T	A	41	29074	0.141019	36.8293	msh3	FALSE	CAN	JSY15	1	msh3-Rep1	GTA	T>A	A/T+1	A/T-1	TA>AT	TA>AT	GACCTGTACCAAT	TACCAAT	CAT	GTA	T	T	T>A	T>A_GTA	TA>AT_TACCAAT	6	310	FALSE	FALSE
24_v.txt	33162	33162-SNV-A-T	SNV	1	A	T	46	29072	0.158228	35.087	msh3	FALSE	CAN	JSY15	1	msh3-Rep1	AAT	A>T	A/T+1	A/T-1	TA>AT	TA>AT	GTACCAATAGTAC	ATAGTAC	TTA	TTA	T	A	T>A	T>A_TTA	TA>AT_ATAGTAC	6	305	FALSE	FALSE
24_v.txt	33204	33204-SNV-A-T	SNV	1	A	T	11	24799	0.0443566	38.1818	msh3	FALSE	CAN	JSY15	1	msh3-Rep1	AAG	A>T	A/T+1	A/T-1	TA>AT	TA>AT	TGCTTAAGCTCTC	AGCTCTC	TTC	TTC	T	A	T>A	T>A_TTC	TA>AT_AGCTCTC	6	263	FALSE	FALSE
24_v.txt	33207	33207-SNV-T-A	SNV	1	T	A	2	24799	0.008065	28.9989	msh3	FALSE	CAN	JSY15	1	msh3-Rep1	CTC	T>A	A/T+1	A/T-1	TA>AT	TA>AT	TTAAGCTCTCTCT	TCTCTCT	GAG	CTC	T	T	T>A	T>A_CTC	TA>AT_TCTCTCT	6	260	FALSE	FALSE
24_v.txt	33209	33209-SNV-T-A	SNV	1	T	A	8	24799	0.0322594	37.9977	msh3	FALSE	CAN	JSY15	1	msh3-Rep1	CTC	T>A	A/T+1	A/T-1	TA>AT	TA>AT	AAGCTCTCTCTTC	TCTCTTC	GAG	CTC	T	T	T>A	T>A_CTC	TA>AT_TCTCTTC	6	258	FALSE	FALSE
24_v.txt	33211	33211-SNV-T-A	SNV	1	T	A	3	24799	0.0120973	35.9997	msh3	FALSE	CAN	JSY15	1	msh3-Rep1	CTC	T>A	A/T+1	A/T-1	TA>AT	TA>AT	GCTCTCTCTTCAC	TCTTCAC	GAG	CTC	T	T	T>A	T>A_CTC	TA>AT_TCTTCAC	6	256	FALSE	FALSE
24_v.txt	33295	33295-SNV-T-A	SNV	1	T	A	24	24839	0.0966222	52.5833	msh3	FALSE	CAN	JSY15	1	msh3-Rep1	CTC	T>A	A/T+1	A/T-1	TA>AT	TA>AT	TTACTCTCGTCGG	TCGTCGG	GAG	CTC	T	T	T>A	T>A_CTC	TA>AT_TCGTCGG	6	172	FALSE	FALSE
24_v.txt	33364	33364-SNV-T-A	SNV	1	T	A	73	24835	0.29394	52.1233	msh3	FALSE	CAN	JSY15	1	msh3-Rep1	CTG	T>A	A/T+1	A/T-1	TA>AT	TA>AT	CACGTCTGTGGTG	TGTGGTG	GAC	CTG	T	T	T>A	T>A_CTG	TA>AT_TGTGGTG	6	103	FALSE	FALSE
24_v.txt	31650	31650-SNV-C-T	SNV	1	C	T	27	14060	0.192034	37.0741	msh3	FALSE	CAN	JSY15	1	msh3-Rep1	GCG	C>T	A/T+1	G/C-1	CG>TA	CG>TA	AGAATGCGAAATG	CGAAATG	CGC	GCG	C	A	C>T	C>T_GCG	CG>TA_CGAAATG	6	1817	FALSE	FALSE
24_v.txt	31806	31806-SNV-C-T	SNV	1	C	T	16	14060	0.113798	58.75	msh3	FALSE	CAN	JSY15	1	msh3-Rep1	CCA	C>T	A/T+1	G/C-1	CG>TA	CG>TA	ATCTTCCAAATAA	CAAATAA	GGT	CCA	C	A	C>T	C>T_CCA	CG>TA_CAAATAA	6	1661	FALSE	FALSE
24_v.txt	31817	31817-SNV-G-A	SNV	1	G	A	11	14059	0.0782417	53.1818	msh3	FALSE	CAN	JSY15	1	msh3-Rep1	TGC	G>A	A/T+1	G/C-1	CG>TA	CG>TA	AAATCTGCATCTG	GCATCTG	ACG	ACG	C	T	C>T	C>T_ACG	CG>TA_GCATCTG	6	1650	FALSE	FALSE
24_v.txt	31818	31818-SNV-C-T	SNV	1	C	T	2	14060	0.0142248	41.9999	msh3	FALSE	CAN	JSY15	1	msh3-Rep1	GCA	C>T	A/T+1	G/C-1	CG>TA	CG>TA	AATCTGCATCTGA	CATCTGA	CGT	GCA	C	A	C>T	C>T_GCA	CG>TA_CATCTGA	6	1649	FALSE	FALSE
24_v.txt	31830	31830-SNV-C-T	SNV	1	C	T	18	14060	0.128023	55.1667	msh3	FALSE	CAN	JSY15	1	msh3-Rep1	GCA	C>T	A/T+1	G/C-1	CG>TA	CG>TA	AATATGCATTGAA	CATTGAA	CGT	GCA	C	A	C>T	C>T_GCA	CG>TA_CATTGAA	6	1637	FALSE	FALSE
24_v.txt	31834	31834-SNV-G-A	SNV	1	G	A	18	14060	0.128023	44.9444	msh3	FALSE	CAN	JSY15	1	msh3-Rep1	TGA	G>A	A/T+1	G/C-1	CG>TA	CG>TA	TGCATTGAAATAA	GAAATAA	ACT	ACT	C	T	C>T	C>T_ACT	CG>TA_GAAATAA	6	1633	FALSE	FALSE
24_v.txt	31879	31879-SNV-C-T	SNV	1	C	T	20	14060	0.142248	45.1022	msh3	FALSE	CAN	JSY15	1	msh3-Rep1	GCG	C>T	A/T+1	G/C-1	CG>TA	CG>TA	TATAGGCGGCAGC	CGGCAGC	CGC	GCG	C	A	C>T	C>T_GCG	CG>TA_CGGCAGC	6	1588	FALSE	FALSE
24_v.txt	31882	31882-SNV-C-T	SNV	1	C	T	21	14060	0.14936	48.4286	msh3	FALSE	CAN	JSY15	1	msh3-Rep1	GCA	C>T	A/T+1	G/C-1	CG>TA	CG>TA	AGGCGGCAGCAAA	CAGCAAA	CGT	GCA	C	A	C>T	C>T_GCA	CG>TA_CAGCAAA	6	1585	FALSE	FALSE
24_v.txt	31884	31884-SNV-G-A	SNV	1	G	A	19	14060	0.135135	39	msh3	FALSE	CAN	JSY15	1	msh3-Rep1	AGC	G>A	A/T+1	G/C-1	CG>TA	CG>TA	GCGGCAGCAAAGC	GCAAAGC	TCG	TCG	C	T	C>T	C>T_TCG	CG>TA_GCAAAGC	6	1583	FALSE	FALSE
24_v.txt	31911	31911-SNV-G-A	SNV	1	G	A	13	13964	0.0930965	46	msh3	FALSE	CAN	JSY15	1	msh3-Rep1	TGC	G>A	A/T+1	G/C-1	CG>TA	CG>TA	TTTGGTGCAAAAG	GCAAAAG	ACG	ACG	C	T	C>T	C>T_ACG	CG>TA_GCAAAAG	6	1556	FALSE	FALSE
24_v.txt	31920	31920-SNV-G-A	SNV	1	G	A	15	13964	0.107419	35.1333	msh3	FALSE	CAN	JSY15	1	msh3-Rep1	CGT	G>A	A/T+1	G/C-1	CG>TA	CG>TA	AAAGCCGTGAAAC	GTGAAAC	GCA	GCA	C	T	C>T	C>T_GCA	CG>TA_GTGAAAC	6	1547	FALSE	FALSE
24_v.txt	31930	31930-SNV-G-A	SNV	1	G	A	17	13963	0.12175	35.8235	msh3	FALSE	CAN	JSY15	1	msh3-Rep1	TGA	G>A	A/T+1	G/C-1	CG>TA	CG>TA	AACCTTGAATAAT	GAATAAT	ACT	ACT	C	T	C>T	C>T_ACT	CG>TA_GAATAAT	6	1537	FALSE	FALSE
24_v.txt	31962	31962-SNV-G-A	SNV	1	G	A	47	30746	0.152865	36.0426	msh3	FALSE	CAN	JSY15	1	msh3-Rep1	CGC	G>A	A/T+1	G/C-1	CG>TA	CG>TA	GTGGCCGCATAAT	GCATAAT	GCG	GCG	C	T	C>T	C>T_GCG	CG>TA_GCATAAT	6	1505	FALSE	FALSE
24_v.txt	31972	31972-SNV-C-T	SNV	1	C	T	22	30746	0.071554	35.4545	msh3	FALSE	CAN	JSY15	1	msh3-Rep1	GCC	C>T	A/T+1	G/C-1	CG>TA	CG>TA	AATAAGCCAAGCC	CCAAGCC	CGG	GCC	C	A	C>T	C>T_GCC	CG>TA_CCAAGCC	6	1495	FALSE	FALSE
24_v.txt	31979	31979-SNV-G-A	SNV	1	G	A	12	30746	0.0390295	37.6605	msh3	FALSE	CAN	JSY15	1	msh3-Rep1	CGG	G>A	A/T+1	G/C-1	CG>TA	CG>TA	CAAGCCGGGCATT	GGGCATT	GCC	GCC	C	T	C>T	C>T_GCC	CG>TA_GGGCATT	6	1488	FALSE	FALSE
24_v.txt	31980	31980-SNV-G-A	SNV	1	G	A	31	30746	0.100826	45.094	msh3	FALSE	CAN	JSY15	1	msh3-Rep1	GGG	G>A	A/T+1	G/C-1	CG>TA	CG>TA	AAGCCGGGCATTA	GGCATTA	CCC	CCC	C	T	C>T	C>T_CCC	CG>TA_GGCATTA	6	1487	FALSE	FALSE
24_v.txt	31981	31981-SNV-G-A	SNV	1	G	A	38	30746	0.123593	50.6049	msh3	FALSE	CAN	JSY15	1	msh3-Rep1	GGC	G>A	A/T+1	G/C-1	CG>TA	CG>TA	AGCCGGGCATTAA	GCATTAA	CCG	CCG	C	T	C>T	C>T_CCG	CG>TA_GCATTAA	6	1486	FALSE	FALSE
24_v.txt	32014	32014-SNV-G-A	SNV	1	G	A	9	30746	0.0292721	57.1111	msh3	FALSE	CAN	JSY15	1	msh3-Rep1	CGA	G>A	A/T+1	G/C-1	CG>TA	CG>TA	CGTCACGAGAGAT	GAGAGAT	GCT	GCT	C	T	C>T	C>T_GCT	CG>TA_GAGAGAT	6	1453	FALSE	FALSE
24_v.txt	32041	32041-SNV-G-A	SNV	1	G	A	73	30788	0.237105	61.4932	msh3	FALSE	CAN	JSY15	1	msh3-Rep1	TGC	G>A	A/T+1	G/C-1	CG>TA	CG>TA	AAGCTTGCATAAA	GCATAAA	ACG	ACG	C	T	C>T	C>T_ACG	CG>TA_GCATAAA	6	1426	FALSE	FALSE
24_v.txt	32079	32079-SNV-G-A	SNV	1	G	A	27	30787	0.0876994	56.704	msh3	FALSE	CAN	JSY15	1	msh3-Rep1	TGC	G>A	A/T+1	G/C-1	CG>TA	CG>TA	AACCATGCAAAAA	GCAAAAA	ACG	ACG	C	T	C>T	C>T_ACG	CG>TA_GCAAAAA	6	1388	FALSE	FALSE
24_v.txt	32080	32080-SNV-C-T	SNV	1	C	T	18	30788	0.0584643	58.3235	msh3	FALSE	CAN	JSY15	1	msh3-Rep1	GCA	C>T	A/T+1	G/C-1	CG>TA	CG>TA	ACCATGCAAAAAA	CAAAAAA	CGT	GCA	C	A	C>T	C>T_GCA	CG>TA_CAAAAAA	6	1387	FALSE	FALSE
24_v.txt	32088	32088-SNV-C-T	SNV	1	C	T	227	30788	0.7373	61.0657	msh3	FALSE	CAN	JSY15	1	msh3-Rep1	GCC	C>T	A/T+1	G/C-1	CG>TA	CG>TA	AAAAAGCCTGCAA	CCTGCAA	CGG	GCC	C	A	C>T	C>T_GCC	CG>TA_CCTGCAA	6	1379	FALSE	FALSE
24_v.txt	32089	32089-SNV-C-T	SNV	1	C	T	11	30788	0.0357282	60.4541	msh3	FALSE	CAN	JSY15	1	msh3-Rep1	CCT	C>T	A/T+1	G/C-1	CG>TA	CG>TA	AAAAGCCTGCAAC	CTGCAAC	GGA	CCT	C	A	C>T	C>T_CCT	CG>TA_CTGCAAC	6	1378	FALSE	FALSE
24_v.txt	32092	32092-SNV-C-T	SNV	1	C	T	42	30788	0.136417	58.2857	msh3	FALSE	CAN	JSY15	1	msh3-Rep1	GCA	C>T	A/T+1	G/C-1	CG>TA	CG>TA	AGCCTGCAACACC	CAACACC	CGT	GCA	C	A	C>T	C>T_GCA	CG>TA_CAACACC	6	1375	FALSE	FALSE
24_v.txt	32095	32095-SNV-C-T	SNV	1	C	T	4	30787	0.0129925	55.75	msh3	FALSE	CAN	JSY15	1	msh3-Rep1	ACA	C>T	A/T+1	G/C-1	CG>TA	CG>TA	CTGCAACACCAGT	CACCAGT	TGT	ACA	C	A	C>T	C>T_ACA	CG>TA_CACCAGT	6	1372	FALSE	FALSE
24_v.txt	32114	32114-SNV-C-T	SNV	1	C	T	27	30787	0.0876994	59.2935	msh3	FALSE	CAN	JSY15	1	msh3-Rep1	GCC	C>T	A/T+1	G/C-1	CG>TA	CG>TA	TAATAGCCATTCG	CCATTCG	CGG	GCC	C	A	C>T	C>T_GCC	CG>TA_CCATTCG	6	1353	FALSE	FALSE
24_v.txt	32115	32115-SNV-C-T	SNV	1	C	T	45	30787	0.146166	58.267	msh3	FALSE	CAN	JSY15	1	msh3-Rep1	CCA	C>T	A/T+1	G/C-1	CG>TA	CG>TA	AATAGCCATTCGA	CATTCGA	GGT	CCA	C	A	C>T	C>T_CCA	CG>TA_CATTCGA	6	1352	FALSE	FALSE
24_v.txt	32157	32157-SNV-G-A	SNV	1	G	A	26	30788	0.0844485	48.8846	msh3	FALSE	CAN	JSY15	1	msh3-Rep1	AGC	G>A	A/T+1	G/C-1	CG>TA	CG>TA	ATGTAAGCCAAAG	GCCAAAG	TCG	TCG	C	T	C>T	C>T_TCG	CG>TA_GCCAAAG	6	1310	FALSE	FALSE
24_v.txt	32165	32165-SNV-G-A	SNV	1	G	A	41	30788	0.133169	49.8049	msh3	FALSE	CAN	JSY15	1	msh3-Rep1	CGC	G>A	A/T+1	G/C-1	CG>TA	CG>TA	CAAAGCGCCAAAT	GCCAAAT	GCG	GCG	C	T	C>T	C>T_GCG	CG>TA_GCCAAAT	6	1302	FALSE	FALSE
24_v.txt	32166	32166-SNV-C-T	SNV	1	C	T	30	30788	0.0974406	44.6337	msh3	FALSE	CAN	JSY15	1	msh3-Rep1	GCC	C>T	A/T+1	G/C-1	CG>TA	CG>TA	AAAGCGCCAAATG	CCAAATG	CGG	GCC	C	A	C>T	C>T_GCC	CG>TA_CCAAATG	6	1301	FALSE	FALSE
24_v.txt	32173	32173-SNV-C-T	SNV	1	C	T	37	30788	0.120177	47.8108	msh3	FALSE	CAN	JSY15	1	msh3-Rep1	GCA	C>T	A/T+1	G/C-1	CG>TA	CG>TA	CAAATGCAGCAGT	CAGCAGT	CGT	GCA	C	A	C>T	C>T_GCA	CG>TA_CAGCAGT	6	1294	FALSE	FALSE
24_v.txt	32191	32191-SNV-C-T	SNV	1	C	T	25	30788	0.0812005	43.16	msh3	FALSE	CAN	JSY15	1	msh3-Rep1	GCA	C>T	A/T+1	G/C-1	CG>TA	CG>TA	AAACTGCAATGTA	CAATGTA	CGT	GCA	C	A	C>T	C>T_GCA	CG>TA_CAATGTA	6	1276	FALSE	FALSE
24_v.txt	32205	32205-SNV-C-T	SNV	1	C	T	43	30788	0.139665	40.814	msh3	FALSE	CAN	JSY15	1	msh3-Rep1	ACC	C>T	A/T+1	G/C-1	CG>TA	CG>TA	GGAACACCACCTT	CCACCTT	TGG	ACC	C	A	C>T	C>T_ACC	CG>TA_CCACCTT	6	1262	FALSE	FALSE
24_v.txt	32271	32271-SNV-C-T	SNV	1	C	T	93	36281	0.256333	32.7204	msh3	FALSE	CAN	JSY15	1	msh3-Rep1	ACG	C>T	A/T+1	G/C-1	CG>TA	CG>TA	AAAATACGGGAAC	CGGGAAC	TGC	ACG	C	A	C>T	C>T_ACG	CG>TA_CGGGAAC	6	1196	FALSE	FALSE
24_v.txt	32272	32272-SNV-G-A	SNV	1	G	A	16	36281	0.0441002	33.5625	msh3	FALSE	CAN	JSY15	1	msh3-Rep1	CGG	G>A	A/T+1	G/C-1	CG>TA	CG>TA	AAATACGGGAACC	GGGAACC	GCC	GCC	C	T	C>T	C>T_GCC	CG>TA_GGGAACC	6	1195	FALSE	FALSE
24_v.txt	32277	32277-SNV-C-T	SNV	1	C	T	66	36279	0.181923	16.7422	msh3	FALSE	CAN	JSY15	1	msh3-Rep1	ACC	C>T	A/T+1	G/C-1	CG>TA	CG>TA	CGGGAACCAACGT	CCAACGT	TGG	ACC	C	A	C>T	C>T_ACC	CG>TA_CCAACGT	6	1190	FALSE	FALSE
24_v.txt	32292	32292-SNV-G-A	SNV	1	G	A	66	36279	0.181923	51.8182	msh3	FALSE	CAN	JSY15	1	msh3-Rep1	TGA	G>A	A/T+1	G/C-1	CG>TA	CG>TA	ATATTTGAATTTG	GAATTTG	ACT	ACT	C	T	C>T	C>T_ACT	CG>TA_GAATTTG	6	1175	FALSE	FALSE
24_v.txt	32299	32299-SNV-C-T	SNV	1	C	T	69	36279	0.190193	52.2319	msh3	FALSE	CAN	JSY15	1	msh3-Rep1	GCG	C>T	A/T+1	G/C-1	CG>TA	CG>TA	AATTTGCGGCAGA	CGGCAGA	CGC	GCG	C	A	C>T	C>T_GCG	CG>TA_CGGCAGA	6	1168	FALSE	FALSE
24_v.txt	32301	32301-SNV-G-A	SNV	1	G	A	53	36279	0.14609	51.3019	msh3	FALSE	CAN	JSY15	1	msh3-Rep1	GGC	G>A	A/T+1	G/C-1	CG>TA	CG>TA	TTTGCGGCAGAAA	GCAGAAA	CCG	CCG	C	T	C>T	C>T_CCG	CG>TA_GCAGAAA	6	1166	FALSE	FALSE
24_v.txt	32304	32304-SNV-G-A	SNV	1	G	A	34	36279	0.0937181	61.1584	msh3	FALSE	CAN	JSY15	1	msh3-Rep1	AGA	G>A	A/T+1	G/C-1	CG>TA	CG>TA	GCGGCAGAAATAA	GAAATAA	TCT	TCT	C	T	C>T	C>T_TCT	CG>TA_GAAATAA	6	1163	FALSE	FALSE
24_v.txt	32413	32413-SNV-G-A	SNV	1	G	A	67	36279	0.18468	56.9104	msh3	FALSE	CAN	JSY15	1	msh3-Rep1	TGT	G>A	A/T+1	G/C-1	CG>TA	CG>TA	TAGATTGTGTTAG	GTGTTAG	ACA	ACA	C	T	C>T	C>T_ACA	CG>TA_GTGTTAG	6	1054	FALSE	FALSE
24_v.txt	32436	32436-SNV-G-A	SNV	1	G	A	42	36279	0.115769	47.1905	msh3	FALSE	CAN	JSY15	1	msh3-Rep1	TGG	G>A	A/T+1	G/C-1	CG>TA	CG>TA	TTGTATGGAACTA	GGAACTA	ACC	ACC	C	T	C>T	C>T_ACC	CG>TA_GGAACTA	6	1031	FALSE	FALSE
24_v.txt	32449	32449-SNV-C-T	SNV	1	C	T	45	36279	0.124039	53.8889	msh3	FALSE	CAN	JSY15	1	msh3-Rep1	CCA	C>T	A/T+1	G/C-1	CG>TA	CG>TA	AAAGTCCAATGAA	CAATGAA	GGT	CCA	C	A	C>T	C>T_CCA	CG>TA_CAATGAA	6	1018	FALSE	FALSE
24_v.txt	32466	32466-SNV-C-T	SNV	1	C	T	45	36279	0.124039	49.1099	msh3	FALSE	CAN	JSY15	1	msh3-Rep1	GCC	C>T	A/T+1	G/C-1	CG>TA	CG>TA	AGAGAGCCAATGT	CCAATGT	CGG	GCC	C	A	C>T	C>T_GCC	CG>TA_CCAATGT	6	1001	FALSE	FALSE
24_v.txt	32487	32487-SNV-C-T	SNV	1	C	T	41	36279	0.113013	45.2669	msh3	FALSE	CAN	JSY15	1	msh3-Rep1	ACG	C>T	A/T+1	G/C-1	CG>TA	CG>TA	AAGATACGGAAAA	CGGAAAA	TGC	ACG	C	A	C>T	C>T_ACG	CG>TA_CGGAAAA	6	980	FALSE	FALSE
24_v.txt	32488	32488-SNV-G-A	SNV	1	G	A	64	36279	0.176411	45.5312	msh3	FALSE	CAN	JSY15	1	msh3-Rep1	CGG	G>A	A/T+1	G/C-1	CG>TA	CG>TA	AGATACGGAAAAC	GGAAAAC	GCC	GCC	C	T	C>T	C>T_GCC	CG>TA_GGAAAAC	6	979	FALSE	FALSE
24_v.txt	32530	32530-SNV-G-A	SNV	1	G	A	57	36279	0.157116	38.6491	msh3	FALSE	CAN	JSY15	1	msh3-Rep1	GGG	G>A	A/T+1	G/C-1	CG>TA	CG>TA	TTCTGGGGTTTGC	GGTTTGC	CCC	CCC	C	T	C>T	C>T_CCC	CG>TA_GGTTTGC	6	937	FALSE	FALSE
24_v.txt	32535	32535-SNV-G-A	SNV	1	G	A	46	36279	0.126795	37.5815	msh3	FALSE	CAN	JSY15	1	msh3-Rep1	TGC	G>A	A/T+1	G/C-1	CG>TA	CG>TA	GGGTTTGCAGCTT	GCAGCTT	ACG	ACG	C	T	C>T	C>T_ACG	CG>TA_GCAGCTT	6	932	FALSE	FALSE
24_v.txt	32536	32536-SNV-C-T	SNV	1	C	T	60	36279	0.165385	37.6496	msh3	FALSE	CAN	JSY15	1	msh3-Rep1	GCA	C>T	A/T+1	G/C-1	CG>TA	CG>TA	GGTTTGCAGCTTC	CAGCTTC	CGT	GCA	C	A	C>T	C>T_GCA	CG>TA_CAGCTTC	6	931	FALSE	FALSE
24_v.txt	32542	32542-SNV-C-T	SNV	1	C	T	147	36279	0.405193	37.3193	msh3	FALSE	CAN	JSY15	1	msh3-Rep1	TCA	C>T	A/T+1	G/C-1	CG>TA	CG>TA	CAGCTTCACCAGC	CACCAGC	AGT	TCA	C	A	C>T	C>T_TCA	CG>TA_CACCAGC	6	925	FALSE	FALSE
24_v.txt	32545	32545-SNV-C-T	SNV	1	C	T	16	36279	0.0441026	37.5	msh3	FALSE	CAN	JSY15	1	msh3-Rep1	CCA	C>T	A/T+1	G/C-1	CG>TA	CG>TA	CTTCACCAGCAGT	CAGCAGT	GGT	CCA	C	A	C>T	C>T_CCA	CG>TA_CAGCAGT	6	922	FALSE	FALSE
24_v.txt	32571	32571-SNV-C-T	SNV	1	C	T	53	31991	0.165672	34.7543	msh3	FALSE	CAN	JSY15	1	msh3-Rep1	ACC	C>T	A/T+1	G/C-1	CG>TA	CG>TA	TCAGTACCTTGAA	CCTTGAA	TGG	ACC	C	A	C>T	C>T_ACC	CG>TA_CCTTGAA	6	896	FALSE	FALSE
24_v.txt	32572	32572-SNV-C-T	SNV	1	C	T	59	31991	0.184427	36.2543	msh3	FALSE	CAN	JSY15	1	msh3-Rep1	CCT	C>T	A/T+1	G/C-1	CG>TA	CG>TA	CAGTACCTTGAAA	CTTGAAA	GGA	CCT	C	A	C>T	C>T_CCT	CG>TA_CTTGAAA	6	895	FALSE	FALSE
24_v.txt	32575	32575-SNV-G-A	SNV	1	G	A	55	31991	0.171923	37.5449	msh3	FALSE	CAN	JSY15	1	msh3-Rep1	TGA	G>A	A/T+1	G/C-1	CG>TA	CG>TA	TACCTTGAAATGT	GAAATGT	ACT	ACT	C	T	C>T	C>T_ACT	CG>TA_GAAATGT	6	892	FALSE	FALSE
24_v.txt	32587	32587-SNV-C-T	SNV	1	C	T	31	31991	0.0969023	28.3548	msh3	FALSE	CAN	JSY15	1	msh3-Rep1	GCA	C>T	A/T+1	G/C-1	CG>TA	CG>TA	TGAAGGCAGCGTT	CAGCGTT	CGT	GCA	C	A	C>T	C>T_GCA	CG>TA_CAGCGTT	6	880	FALSE	FALSE
24_v.txt	32590	32590-SNV-C-T	SNV	1	C	T	45	31991	0.140665	35.8222	msh3	FALSE	CAN	JSY15	1	msh3-Rep1	GCG	C>T	A/T+1	G/C-1	CG>TA	CG>TA	AGGCAGCGTTAAT	CGTTAAT	CGC	GCG	C	A	C>T	C>T_GCG	CG>TA_CGTTAAT	6	877	FALSE	FALSE
24_v.txt	32609	32609-SNV-C-T	SNV	1	C	T	40	31991	0.125035	46.6245	msh3	FALSE	CAN	JSY15	1	msh3-Rep1	CCC	C>T	A/T+1	G/C-1	CG>TA	CG>TA	GGAAACCCAACCT	CCAACCT	GGG	CCC	C	A	C>T	C>T_CCC	CG>TA_CCAACCT	6	858	FALSE	FALSE
24_v.txt	32610	32610-SNV-C-T	SNV	1	C	T	54	31991	0.168797	49.5146	msh3	FALSE	CAN	JSY15	1	msh3-Rep1	CCA	C>T	A/T+1	G/C-1	CG>TA	CG>TA	GAAACCCAACCTA	CAACCTA	GGT	CCA	C	A	C>T	C>T_CCA	CG>TA_CAACCTA	6	857	FALSE	FALSE
24_v.txt	32658	32658-SNV-C-T	SNV	1	C	T	27	32052	0.0842381	47.6217	msh3	FALSE	CAN	JSY15	1	msh3-Rep1	ACC	C>T	A/T+1	G/C-1	CG>TA	CG>TA	CCTGGACCCCAGG	CCCCAGG	TGG	ACC	C	A	C>T	C>T_ACC	CG>TA_CCCCAGG	6	809	FALSE	FALSE
24_v.txt	32679	32679-SNV-C-T	SNV	1	C	T	81	32052	0.252714	59.2332	msh3	FALSE	CAN	JSY15	1	msh3-Rep1	CCA	C>T	A/T+1	G/C-1	CG>TA	CG>TA	TTTCTCCAATAAC	CAATAAC	GGT	CCA	C	A	C>T	C>T_CCA	CG>TA_CAATAAC	6	788	FALSE	FALSE
24_v.txt	32700	32700-SNV-C-T	SNV	1	C	T	42	32052	0.131037	59.6905	msh3	FALSE	CAN	JSY15	1	msh3-Rep1	GCC	C>T	A/T+1	G/C-1	CG>TA	CG>TA	ACTGGGCCGGTAA	CCGGTAA	CGG	GCC	C	A	C>T	C>T_GCC	CG>TA_CCGGTAA	6	767	FALSE	FALSE
24_v.txt	32702	32702-SNV-G-A	SNV	1	G	A	22	32052	0.0686385	51.9545	msh3	FALSE	CAN	JSY15	1	msh3-Rep1	CGG	G>A	A/T+1	G/C-1	CG>TA	CG>TA	TGGGCCGGTAACC	GGTAACC	GCC	GCC	C	T	C>T	C>T_GCC	CG>TA_GGTAACC	6	765	FALSE	FALSE
24_v.txt	32735	32735-SNV-G-A	SNV	1	G	A	8	32052	0.0249594	44.875	msh3	FALSE	CAN	JSY15	1	msh3-Rep1	AGT	G>A	A/T+1	G/C-1	CG>TA	CG>TA	AAAACAGTATATT	GTATATT	TCA	TCA	C	T	C>T	C>T_TCA	CG>TA_GTATATT	6	732	FALSE	FALSE
24_v.txt	32749	32749-SNV-C-T	SNV	1	C	T	57	32052	0.177836	56.1053	msh3	FALSE	CAN	JSY15	1	msh3-Rep1	CCG	C>T	A/T+1	G/C-1	CG>TA	CG>TA	GAAACCCGATAAT	CGATAAT	GGC	CCG	C	A	C>T	C>T_CCG	CG>TA_CGATAAT	6	718	FALSE	FALSE
24_v.txt	32776	32776-SNV-C-T	SNV	1	C	T	21	32052	0.0655185	49.7619	msh3	FALSE	CAN	JSY15	1	msh3-Rep1	GCG	C>T	A/T+1	G/C-1	CG>TA	CG>TA	TGGAAGCGACCCA	CGACCCA	CGC	GCG	C	A	C>T	C>T_GCG	CG>TA_CGACCCA	6	691	FALSE	FALSE
24_v.txt	32788	32788-SNV-C-T	SNV	1	C	T	23	32052	0.0717584	47.6957	msh3	FALSE	CAN	JSY15	1	msh3-Rep1	TCG	C>T	A/T+1	G/C-1	CG>TA	CG>TA	AGAACTCGAATTC	CGAATTC	AGC	TCG	C	A	C>T	C>T_TCG	CG>TA_CGAATTC	6	679	FALSE	FALSE
24_v.txt	32796	32796-SNV-C-T	SNV	1	C	T	63	32052	0.196556	43.5072	msh3	FALSE	CAN	JSY15	1	msh3-Rep1	ACC	C>T	A/T+1	G/C-1	CG>TA	CG>TA	AATTCACCGTAAT	CCGTAAT	TGG	ACC	C	A	C>T	C>T_ACC	CG>TA_CCGTAAT	6	671	FALSE	FALSE
24_v.txt	32797	32797-SNV-C-T	SNV	1	C	T	40	32051	0.124801	45.375	msh3	FALSE	CAN	JSY15	1	msh3-Rep1	CCG	C>T	A/T+1	G/C-1	CG>TA	CG>TA	ATTCACCGTAATA	CGTAATA	GGC	CCG	C	A	C>T	C>T_CCG	CG>TA_CGTAATA	6	670	FALSE	FALSE
24_v.txt	32798	32798-SNV-G-A	SNV	1	G	A	109	32052	0.340072	47.8807	msh3	FALSE	CAN	JSY15	1	msh3-Rep1	CGT	G>A	A/T+1	G/C-1	CG>TA	CG>TA	TTCACCGTAATAT	GTAATAT	GCA	GCA	C	T	C>T	C>T_GCA	CG>TA_GTAATAT	6	669	FALSE	FALSE
24_v.txt	32855	32855-SNV-C-T	SNV	1	C	T	96	32051	0.299523	36.7917	msh3	FALSE	CAN	JSY15	1	msh3-Rep1	TCC	C>T	A/T+1	G/C-1	CG>TA	CG>TA	ACTAATCCATGCC	CCATGCC	AGG	TCC	C	A	C>T	C>T_TCC	CG>TA_CCATGCC	6	612	FALSE	FALSE
24_v.txt	32856	32856-SNV-C-T	SNV	1	C	T	81	32051	0.252722	37.1728	msh3	FALSE	CAN	JSY15	1	msh3-Rep1	CCA	C>T	A/T+1	G/C-1	CG>TA	CG>TA	CTAATCCATGCCG	CATGCCG	GGT	CCA	C	A	C>T	C>T_CCA	CG>TA_CATGCCG	6	611	FALSE	FALSE
24_v.txt	32860	32860-SNV-C-T	SNV	1	C	T	33	32050	0.102964	36.3939	msh3	FALSE	CAN	JSY15	1	msh3-Rep1	GCC	C>T	A/T+1	G/C-1	CG>TA	CG>TA	TCCATGCCGCCAG	CCGCCAG	CGG	GCC	C	A	C>T	C>T_GCC	CG>TA_CCGCCAG	6	607	FALSE	FALSE
24_v.txt	32862	32862-SNV-G-A	SNV	1	G	A	37	32051	0.115441	35.4865	msh3	FALSE	CAN	JSY15	1	msh3-Rep1	CGC	G>A	A/T+1	G/C-1	CG>TA	CG>TA	CATGCCGCCAGTG	GCCAGTG	GCG	GCG	C	T	C>T	C>T_GCG	CG>TA_GCCAGTG	6	605	FALSE	FALSE
24_v.txt	32883	32883-SNV-C-T	SNV	1	C	T	34	29073	0.116947	33.1471	msh3	FALSE	CAN	JSY15	1	msh3-Rep1	CCA	C>T	A/T+1	G/C-1	CG>TA	CG>TA	TACGTCCAAAATT	CAAAATT	GGT	CCA	C	A	C>T	C>T_CCA	CG>TA_CAAAATT	6	584	FALSE	FALSE
24_v.txt	32899	32899-SNV-G-A	SNV	1	G	A	28	29073	0.0963093	34.0185	msh3	FALSE	CAN	JSY15	1	msh3-Rep1	TGG	G>A	A/T+1	G/C-1	CG>TA	CG>TA	TGACTTGGCCAAC	GGCCAAC	ACC	ACC	C	T	C>T	C>T_ACC	CG>TA_GGCCAAC	6	568	FALSE	FALSE
24_v.txt	32900	32900-SNV-G-A	SNV	1	G	A	40	29073	0.137585	35.4221	msh3	FALSE	CAN	JSY15	1	msh3-Rep1	GGC	G>A	A/T+1	G/C-1	CG>TA	CG>TA	GACTTGGCCAACT	GCCAACT	CCG	CCG	C	T	C>T	C>T_CCG	CG>TA_GCCAACT	6	567	FALSE	FALSE
24_v.txt	32901	32901-SNV-C-T	SNV	1	C	T	58	29073	0.199498	32.2586	msh3	FALSE	CAN	JSY15	1	msh3-Rep1	GCC	C>T	A/T+1	G/C-1	CG>TA	CG>TA	ACTTGGCCAACTA	CCAACTA	CGG	GCC	C	A	C>T	C>T_GCC	CG>TA_CCAACTA	6	566	FALSE	FALSE
24_v.txt	32910	32910-SNV-C-T	SNV	1	C	T	37	29073	0.127266	48.379	msh3	FALSE	CAN	JSY15	1	msh3-Rep1	ACT	C>T	A/T+1	G/C-1	CG>TA	CG>TA	ACTACACTAAGTT	CTAAGTT	TGA	ACT	C	A	C>T	C>T_ACT	CG>TA_CTAAGTT	6	557	FALSE	FALSE
24_v.txt	32917	32917-SNV-C-T	SNV	1	C	T	32	29073	0.110068	43.657	msh3	FALSE	CAN	JSY15	1	msh3-Rep1	TCC	C>T	A/T+1	G/C-1	CG>TA	CG>TA	TAAGTTCCAGGGC	CCAGGGC	AGG	TCC	C	A	C>T	C>T_TCC	CG>TA_CCAGGGC	6	550	FALSE	FALSE
24_v.txt	32922	32922-SNV-G-A	SNV	1	G	A	29	29073	0.0997489	51.4483	msh3	FALSE	CAN	JSY15	1	msh3-Rep1	GGC	G>A	A/T+1	G/C-1	CG>TA	CG>TA	TCCAGGGCAAAAG	GCAAAAG	CCG	CCG	C	T	C>T	C>T_CCG	CG>TA_GCAAAAG	6	545	FALSE	FALSE
24_v.txt	32935	32935-SNV-C-T	SNV	1	C	T	38	29073	0.130705	42.5269	msh3	FALSE	CAN	JSY15	1	msh3-Rep1	GCC	C>T	A/T+1	G/C-1	CG>TA	CG>TA	TGATTGCCCAAGA	CCCAAGA	CGG	GCC	C	A	C>T	C>T_GCC	CG>TA_CCCAAGA	6	532	FALSE	FALSE
24_v.txt	32946	32946-SNV-C-T	SNV	1	C	T	59	29073	0.202937	58.2542	msh3	FALSE	CAN	JSY15	1	msh3-Rep1	CCA	C>T	A/T+1	G/C-1	CG>TA	CG>TA	GAAAACCAATACA	CAATACA	GGT	CCA	C	A	C>T	C>T_CCA	CG>TA_CAATACA	6	521	FALSE	FALSE
24_v.txt	32958	32958-SNV-C-T	SNV	1	C	T	59	29073	0.202937	52.7066	msh3	FALSE	CAN	JSY15	1	msh3-Rep1	ACC	C>T	A/T+1	G/C-1	CG>TA	CG>TA	ATGTAACCATTGG	CCATTGG	TGG	ACC	C	A	C>T	C>T_ACC	CG>TA_CCATTGG	6	509	FALSE	FALSE
24_v.txt	32965	32965-SNV-C-T	SNV	1	C	T	26	29073	0.0894301	58.2308	msh3	FALSE	CAN	JSY15	1	msh3-Rep1	GCC	C>T	A/T+1	G/C-1	CG>TA	CG>TA	CATTGGCCGCACC	CCGCACC	CGG	GCC	C	A	C>T	C>T_GCC	CG>TA_CCGCACC	6	502	FALSE	FALSE
24_v.txt	32967	32967-SNV-G-A	SNV	1	G	A	74	29073	0.254532	60.7078	msh3	FALSE	CAN	JSY15	1	msh3-Rep1	CGC	G>A	A/T+1	G/C-1	CG>TA	CG>TA	TTGGCCGCACCAA	GCACCAA	GCG	GCG	C	T	C>T	C>T_GCG	CG>TA_GCACCAA	6	500	FALSE	FALSE
24_v.txt	32968	32968-SNV-C-T	SNV	1	C	T	8	29072	0.0275179	51.9564	msh3	FALSE	CAN	JSY15	1	msh3-Rep1	GCA	C>T	A/T+1	G/C-1	CG>TA	CG>TA	TGGCCGCACCAAA	CACCAAA	CGT	GCA	C	A	C>T	C>T_GCA	CG>TA_CACCAAA	6	499	FALSE	FALSE
24_v.txt	32970	32970-SNV-C-T	SNV	1	C	T	15	29072	0.051596	52.5999	msh3	FALSE	CAN	JSY15	1	msh3-Rep1	ACC	C>T	A/T+1	G/C-1	CG>TA	CG>TA	GCCGCACCAAATG	CCAAATG	TGG	ACC	C	A	C>T	C>T_ACC	CG>TA_CCAAATG	6	497	FALSE	FALSE
24_v.txt	32995	32995-SNV-G-A	SNV	1	G	A	72	29072	0.247661	63.1233	msh3	FALSE	CAN	JSY15	1	msh3-Rep1	TGT	G>A	A/T+1	G/C-1	CG>TA	CG>TA	ATCTTTGTGAGAA	GTGAGAA	ACA	ACA	C	T	C>T	C>T_ACA	CG>TA_GTGAGAA	6	472	FALSE	FALSE
24_v.txt	33006	33006-SNV-G-A	SNV	1	G	A	13	29073	0.044715	62.2307	msh3	FALSE	CAN	JSY15	1	msh3-Rep1	TGT	G>A	A/T+1	G/C-1	CG>TA	CG>TA	AAAACTGTGAAAG	GTGAAAG	ACA	ACA	C	T	C>T	C>T_ACA	CG>TA_GTGAAAG	6	461	FALSE	FALSE
24_v.txt	33012	33012-SNV-G-A	SNV	1	G	A	51	29074	0.175414	60.7843	msh3	FALSE	CAN	JSY15	1	msh3-Rep1	AGA	G>A	A/T+1	G/C-1	CG>TA	CG>TA	GTGAAAGAGGATG	GAGGATG	TCT	TCT	C	T	C>T	C>T_TCT	CG>TA_GAGGATG	6	455	FALSE	FALSE
24_v.txt	33015	33015-SNV-G-A	SNV	1	G	A	43	29074	0.147898	56	msh3	FALSE	CAN	JSY15	1	msh3-Rep1	GGA	G>A	A/T+1	G/C-1	CG>TA	CG>TA	AAAGAGGATGTAA	GATGTAA	CCT	CCT	C	T	C>T	C>T_CCT	CG>TA_GATGTAA	6	452	FALSE	FALSE
24_v.txt	33024	33024-SNV-G-A	SNV	1	G	A	21	29074	0.0722295	59.7619	msh3	FALSE	CAN	JSY15	1	msh3-Rep1	AGG	G>A	A/T+1	G/C-1	CG>TA	CG>TA	GTAACAGGGATGA	GGGATGA	TCC	TCC	C	T	C>T	C>T_TCC	CG>TA_GGGATGA	6	443	FALSE	FALSE
24_v.txt	33043	33043-SNV-C-T	SNV	1	C	T	73	29074	0.251083	60.5479	msh3	FALSE	CAN	JSY15	1	msh3-Rep1	TCA	C>T	A/T+1	G/C-1	CG>TA	CG>TA	CCATTTCACCCAA	CACCCAA	AGT	TCA	C	A	C>T	C>T_TCA	CG>TA_CACCCAA	6	424	FALSE	FALSE
24_v.txt	33046	33046-SNV-C-T	SNV	1	C	T	69	29074	0.237325	58.5507	msh3	FALSE	CAN	JSY15	1	msh3-Rep1	CCC	C>T	A/T+1	G/C-1	CG>TA	CG>TA	TTTCACCCAAGGA	CCAAGGA	GGG	CCC	C	A	C>T	C>T_CCC	CG>TA_CCAAGGA	6	421	FALSE	FALSE
24_v.txt	33051	33051-SNV-G-A	SNV	1	G	A	18	29074	0.061911	47.5556	msh3	FALSE	CAN	JSY15	1	msh3-Rep1	GGA	G>A	A/T+1	G/C-1	CG>TA	CG>TA	CCCAAGGACTGCG	GACTGCG	CCT	CCT	C	T	C>T	C>T_CCT	CG>TA_GACTGCG	6	416	FALSE	FALSE
24_v.txt	33055	33055-SNV-G-A	SNV	1	G	A	44	29074	0.151338	55.7955	msh3	FALSE	CAN	JSY15	1	msh3-Rep1	TGC	G>A	A/T+1	G/C-1	CG>TA	CG>TA	AGGACTGCGTGAC	GCGTGAC	ACG	ACG	C	T	C>T	C>T_ACG	CG>TA_GCGTGAC	6	412	FALSE	FALSE
24_v.txt	33056	33056-SNV-C-T	SNV	1	C	T	26	29074	0.089427	57.1911	msh3	FALSE	CAN	JSY15	1	msh3-Rep1	GCG	C>T	A/T+1	G/C-1	CG>TA	CG>TA	GGACTGCGTGACA	CGTGACA	CGC	GCG	C	A	C>T	C>T_GCG	CG>TA_CGTGACA	6	411	FALSE	FALSE
24_v.txt	33070	33070-SNV-C-T	SNV	1	C	T	49	29074	0.168535	54.0612	msh3	FALSE	CAN	JSY15	1	msh3-Rep1	GCC	C>T	A/T+1	G/C-1	CG>TA	CG>TA	AATATGCCAAAGA	CCAAAGA	CGG	GCC	C	A	C>T	C>T_GCC	CG>TA_CCAAAGA	6	397	FALSE	FALSE
24_v.txt	33075	33075-SNV-G-A	SNV	1	G	A	4	29074	0.013758	26.4991	msh3	FALSE	CAN	JSY15	1	msh3-Rep1	AGA	G>A	A/T+1	G/C-1	CG>TA	CG>TA	GCCAAAGAACCCA	GAACCCA	TCT	TCT	C	T	C>T	C>T_TCT	CG>TA_GAACCCA	6	392	FALSE	FALSE
24_v.txt	33103	33103-SNV-C-T	SNV	1	C	T	8	29074	0.027516	39.2499	msh3	FALSE	CAN	JSY15	1	msh3-Rep1	GCG	C>T	A/T+1	G/C-1	CG>TA	CG>TA	TAAGAGCGCCCAC	CGCCCAC	CGC	GCG	C	A	C>T	C>T_GCG	CG>TA_CGCCCAC	6	364	FALSE	FALSE
24_v.txt	33104	33104-SNV-G-A	SNV	1	G	A	19	29074	0.0653505	39	msh3	FALSE	CAN	JSY15	1	msh3-Rep1	CGC	G>A	A/T+1	G/C-1	CG>TA	CG>TA	AAGAGCGCCCACT	GCCCACT	GCG	GCG	C	T	C>T	C>T_GCG	CG>TA_GCCCACT	6	363	FALSE	FALSE
24_v.txt	33113	33113-SNV-G-A	SNV	1	G	A	21	29074	0.0722295	45.2855	msh3	FALSE	CAN	JSY15	1	msh3-Rep1	GGC	G>A	A/T+1	G/C-1	CG>TA	CG>TA	CACTGGGCCGGCG	GCCGGCG	CCG	CCG	C	T	C>T	C>T_CCG	CG>TA_GCCGGCG	6	354	FALSE	FALSE
24_v.txt	33114	33114-SNV-C-T	SNV	1	C	T	23	29074	0.0791085	40.2609	msh3	FALSE	CAN	JSY15	1	msh3-Rep1	GCC	C>T	A/T+1	G/C-1	CG>TA	CG>TA	ACTGGGCCGGCGT	CCGGCGT	CGG	GCC	C	A	C>T	C>T_GCC	CG>TA_CCGGCGT	6	353	FALSE	FALSE
24_v.txt	33115	33115-SNV-C-T	SNV	1	C	T	92	29074	0.316434	43.7065	msh3	FALSE	CAN	JSY15	1	msh3-Rep1	CCG	C>T	A/T+1	G/C-1	CG>TA	CG>TA	CTGGGCCGGCGTT	CGGCGTT	GGC	CCG	C	A	C>T	C>T_CCG	CG>TA_CGGCGTT	6	352	FALSE	FALSE
24_v.txt	33118	33118-SNV-C-T	SNV	1	C	T	25	29074	0.0859875	38.6	msh3	FALSE	CAN	JSY15	1	msh3-Rep1	GCG	C>T	A/T+1	G/C-1	CG>TA	CG>TA	GGCCGGCGTTGGT	CGTTGGT	CGC	GCG	C	A	C>T	C>T_GCG	CG>TA_CGTTGGT	6	349	FALSE	FALSE
24_v.txt	33153	33153-SNV-C-T	SNV	1	C	T	4	29074	0.013758	36.2471	msh3	FALSE	CAN	JSY15	1	msh3-Rep1	ACC	C>T	A/T+1	G/C-1	CG>TA	CG>TA	AAAAGACCTGTAC	CCTGTAC	TGG	ACC	C	A	C>T	C>T_ACC	CG>TA_CCTGTAC	6	314	FALSE	FALSE
24_v.txt	33154	33154-SNV-C-T	SNV	1	C	T	38	29074	0.130701	36.9735	msh3	FALSE	CAN	JSY15	1	msh3-Rep1	CCT	C>T	A/T+1	G/C-1	CG>TA	CG>TA	AAAGACCTGTACC	CTGTACC	GGA	CCT	C	A	C>T	C>T_CCT	CG>TA_CTGTACC	6	313	FALSE	FALSE
24_v.txt	33159	33159-SNV-C-T	SNV	1	C	T	22	29074	0.075669	36.9545	msh3	FALSE	CAN	JSY15	1	msh3-Rep1	ACC	C>T	A/T+1	G/C-1	CG>TA	CG>TA	CCTGTACCAATAG	CCAATAG	TGG	ACC	C	A	C>T	C>T_ACC	CG>TA_CCAATAG	6	308	FALSE	FALSE
24_v.txt	33168	33168-SNV-C-T	SNV	1	C	T	62	29022	0.213631	36.3064	msh3	FALSE	CAN	JSY15	1	msh3-Rep1	ACC	C>T	A/T+1	G/C-1	CG>TA	CG>TA	ATAGTACCACCAA	CCACCAA	TGG	ACC	C	A	C>T	C>T_ACC	CG>TA_CCACCAA	6	299	FALSE	FALSE
24_v.txt	33169	33169-SNV-C-T	SNV	1	C	T	51	29022	0.175729	37.3529	msh3	FALSE	CAN	JSY15	1	msh3-Rep1	CCA	C>T	A/T+1	G/C-1	CG>TA	CG>TA	TAGTACCACCAAG	CACCAAG	GGT	CCA	C	A	C>T	C>T_CCA	CG>TA_CACCAAG	6	298	FALSE	FALSE
24_v.txt	33178	33178-SNV-C-T	SNV	1	C	T	18	29010	0.0620476	33.5556	msh3	FALSE	CAN	JSY15	1	msh3-Rep1	GCA	C>T	A/T+1	G/C-1	CG>TA	CG>TA	CAAGGGCAATCAT	CAATCAT	CGT	GCA	C	A	C>T	C>T_GCA	CG>TA_CAATCAT	6	289	FALSE	FALSE
24_v.txt	33193	33193-SNV-G-A	SNV	1	G	A	28	24770	0.11304	35.0714	msh3	FALSE	CAN	JSY15	1	msh3-Rep1	TGT	G>A	A/T+1	G/C-1	CG>TA	CG>TA	CAATATGTCTTTG	GTCTTTG	ACA	ACA	C	T	C>T	C>T_ACA	CG>TA_GTCTTTG	6	274	FALSE	FALSE
24_v.txt	33205	33205-SNV-G-A	SNV	1	G	A	10	24799	0.0403242	39.8983	msh3	FALSE	CAN	JSY15	1	msh3-Rep1	AGC	G>A	A/T+1	G/C-1	CG>TA	CG>TA	GCTTAAGCTCTCT	GCTCTCT	TCG	TCG	C	T	C>T	C>T_TCG	CG>TA_GCTCTCT	6	262	FALSE	FALSE
24_v.txt	33206	33206-SNV-C-T	SNV	1	C	T	2	24799	0.008065	24.4999	msh3	FALSE	CAN	JSY15	1	msh3-Rep1	GCT	C>T	A/T+1	G/C-1	CG>TA	CG>TA	CTTAAGCTCTCTC	CTCTCTC	CGA	GCT	C	A	C>T	C>T_GCT	CG>TA_CTCTCTC	6	261	FALSE	FALSE
24_v.txt	33258	33258-SNV-C-T	SNV	1	C	T	30	24839	0.120778	40.5333	msh3	FALSE	CAN	JSY15	1	msh3-Rep1	GCC	C>T	A/T+1	G/C-1	CG>TA	CG>TA	CCTATGCCATCCT	CCATCCT	CGG	GCC	C	A	C>T	C>T_GCC	CG>TA_CCATCCT	6	209	FALSE	FALSE
24_v.txt	33309	33309-SNV-C-T	SNV	1	C	T	24	24839	0.0966222	58.5	msh3	FALSE	CAN	JSY15	1	msh3-Rep1	GCG	C>T	A/T+1	G/C-1	CG>TA	CG>TA	AAAGAGCGCAATG	CGCAATG	CGC	GCG	C	A	C>T	C>T_GCG	CG>TA_CGCAATG	6	158	FALSE	FALSE
24_v.txt	33356	33356-SNV-C-T	SNV	1	C	T	9	24839	0.0362333	41.4394	msh3	FALSE	CAN	JSY15	1	msh3-Rep1	ACC	C>T	A/T+1	G/C-1	CG>TA	CG>TA	TATTGACCCACGT	CCCACGT	TGG	ACC	C	A	C>T	C>T_ACC	CG>TA_CCCACGT	6	111	FALSE	FALSE
24_v.txt	33360	33360-SNV-C-T	SNV	1	C	T	11	24839	0.0442852	58	msh3	FALSE	CAN	JSY15	1	msh3-Rep1	ACG	C>T	A/T+1	G/C-1	CG>TA	CG>TA	GACCCACGTCTGT	CGTCTGT	TGC	ACG	C	A	C>T	C>T_ACG	CG>TA_CGTCTGT	6	107	FALSE	FALSE
24_v.txt	33376	33376-SNV-G-A	SNV	1	G	A	110	24835	0.442923	53.3091	msh3	FALSE	CAN	JSY15	1	msh3-Rep1	TGT	G>A	A/T+1	G/C-1	CG>TA	CG>TA	GTGTTTGTGAAGC	GTGAAGC	ACA	ACA	C	T	C>T	C>T_ACA	CG>TA_GTGAAGC	6	91	FALSE	FALSE
24_v.txt	33392	33392-SNV-G-A	SNV	1	G	A	32	24835	0.12885	50.0938	msh3	FALSE	CAN	JSY15	1	msh3-Rep1	CGT	G>A	A/T+1	G/C-1	CG>TA	CG>TA	AACGTCGTGAAAG	GTGAAAG	GCA	GCA	C	T	C>T	C>T_GCA	CG>TA_GTGAAAG	6	75	FALSE	FALSE
24_v.txt	33412	33412-SNV-G-A	SNV	1	G	A	36	24835	0.144957	48.3611	msh3	FALSE	CAN	JSY15	1	msh3-Rep1	GGC	G>A	A/T+1	G/C-1	CG>TA	CG>TA	TGACCGGCTCATT	GCTCATT	CCG	CCG	C	T	C>T	C>T_CCG	CG>TA_GCTCATT	6	55	FALSE	FALSE
24_v.txt	33474	33474-SNV-C-T	SNV	1	C	T	31	24833	0.124834	33.7742	msh3	FALSE	CAN	JSY15	1	msh3-Rep1	GCC	C>T	A/T+1	G/C-1	CG>TA	CG>TA	GCTATGCCTTTTT	CCTTTTT	CGG	GCC	C	A	C>T	C>T_GCC	CG>TA_CCTTTTT	6	N_A	FALSE	FALSE
24_v.txt	31815	31815-SNV-C-G	SNV	1	C	G	1	14060	0.007112	64	msh3	FALSE	CAN	JSY15	1	msh3-Rep1	TCT	C>G	G/C+1	G/C-1	CG>GC	CG>GC	ATAAATCTGCATC	CTGCATC	AGA	TCT	C	C	C>G	C>G_TCT	CG>GC_CTGCATC	6	1652	FALSE	FALSE
24_v.txt	31956	31956-SNV-G-C	SNV	1	G	C	42	30746	0.136603	36.0714	msh3	FALSE	CAN	JSY15	1	msh3-Rep1	TGT	G>C	G/C+1	G/C-1	CG>GC	CG>GC	ATAAATGTGGCCG	GTGGCCG	ACA	ACA	C	G	C>G	C>G_ACA	CG>GC_GTGGCCG	6	1511	FALSE	FALSE
24_v.txt	31980	31980-SNV-G-C	SNV	1	G	C	19	30746	0.0617967	51.1001	msh3	FALSE	CAN	JSY15	1	msh3-Rep1	GGG	G>C	G/C+1	G/C-1	CG>GC	CG>GC	AAGCCGGGCATTA	GGCATTA	CCC	CCC	C	G	C>G	C>G_CCC	CG>GC_GGCATTA	6	1487	FALSE	FALSE
24_v.txt	31981	31981-SNV-G-C	SNV	1	G	C	48	30746	0.156118	51.9775	msh3	FALSE	CAN	JSY15	1	msh3-Rep1	GGC	G>C	G/C+1	G/C-1	CG>GC	CG>GC	AGCCGGGCATTAA	GCATTAA	CCG	CCG	C	G	C>G	C>G_CCG	CG>GC_GCATTAA	6	1486	FALSE	FALSE
24_v.txt	32014	32014-SNV-G-C	SNV	1	G	C	3	30746	0.009757	64	msh3	FALSE	CAN	JSY15	1	msh3-Rep1	CGA	G>C	G/C+1	G/C-1	CG>GC	CG>GC	CGTCACGAGAGAT	GAGAGAT	GCT	GCT	C	G	C>G	C>G_GCT	CG>GC_GAGAGAT	6	1453	FALSE	FALSE
24_v.txt	32025	32025-SNV-C-G	SNV	1	C	G	12	30746	0.0390295	59.6667	msh3	FALSE	CAN	JSY15	1	msh3-Rep1	ACG	C>G	G/C+1	G/C-1	CG>GC	CG>GC	ATGCCACGGTATT	CGGTATT	TGC	ACG	C	C	C>G	C>G_ACG	CG>GC_CGGTATT	6	1442	FALSE	FALSE
24_v.txt	32058	32058-SNV-G-C	SNV	1	G	C	24	30787	0.077955	59.0349	msh3	FALSE	CAN	JSY15	1	msh3-Rep1	CGA	G>C	G/C+1	G/C-1	CG>GC	CG>GC	ATGTGCGAGATTG	GAGATTG	GCT	GCT	C	G	C>G	C>G_GCT	CG>GC_GAGATTG	6	1409	FALSE	FALSE
24_v.txt	32064	32064-SNV-G-C	SNV	1	G	C	108	30788	0.350786	61.7626	msh3	FALSE	CAN	JSY15	1	msh3-Rep1	TGA	G>C	G/C+1	G/C-1	CG>GC	CG>GC	GAGATTGAGATAA	GAGATAA	ACT	ACT	C	G	C>G	C>G_ACT	CG>GC_GAGATAA	6	1403	FALSE	FALSE
24_v.txt	32089	32089-SNV-C-G	SNV	1	C	G	24	30788	0.0779524	55.1668	msh3	FALSE	CAN	JSY15	1	msh3-Rep1	CCT	C>G	G/C+1	G/C-1	CG>GC	CG>GC	AAAAGCCTGCAAC	CTGCAAC	GGA	CCT	C	C	C>G	C>G_CCT	CG>GC_CTGCAAC	6	1378	FALSE	FALSE
24_v.txt	32092	32092-SNV-C-G	SNV	1	C	G	12	30788	0.0389762	60.5833	msh3	FALSE	CAN	JSY15	1	msh3-Rep1	GCA	C>G	G/C+1	G/C-1	CG>GC	CG>GC	AGCCTGCAACACC	CAACACC	CGT	GCA	C	C	C>G	C>G_GCA	CG>GC_CAACACC	6	1375	FALSE	FALSE
24_v.txt	32153	32153-SNV-G-C	SNV	1	G	C	123	30788	0.399506	50.9675	msh3	FALSE	CAN	JSY15	1	msh3-Rep1	TGT	G>C	G/C+1	G/C-1	CG>GC	CG>GC	CTCCATGTAAGCC	GTAAGCC	ACA	ACA	C	G	C>G	C>G_ACA	CG>GC_GTAAGCC	6	1314	FALSE	FALSE
24_v.txt	32223	32223-SNV-G-C	SNV	1	G	C	19	30788	0.0617124	35.0526	msh3	FALSE	CAN	JSY15	1	msh3-Rep1	TGA	G>C	G/C+1	G/C-1	CG>GC	CG>GC	GTCCTTGACAGGA	GACAGGA	ACT	ACT	C	G	C>G	C>G_ACT	CG>GC_GACAGGA	6	1244	FALSE	FALSE
24_v.txt	32271	32271-SNV-C-G	SNV	1	C	G	38	36281	0.104738	35.9211	msh3	FALSE	CAN	JSY15	1	msh3-Rep1	ACG	C>G	G/C+1	G/C-1	CG>GC	CG>GC	AAAATACGGGAAC	CGGGAAC	TGC	ACG	C	C	C>G	C>G_ACG	CG>GC_CGGGAAC	6	1196	FALSE	FALSE
24_v.txt	32272	32272-SNV-G-C	SNV	1	G	C	8	36281	0.0220501	37.25	msh3	FALSE	CAN	JSY15	1	msh3-Rep1	CGG	G>C	G/C+1	G/C-1	CG>GC	CG>GC	AAATACGGGAACC	GGGAACC	GCC	GCC	C	G	C>G	C>G_GCC	CG>GC_GGGAACC	6	1195	FALSE	FALSE
24_v.txt	32278	32278-SNV-C-G	SNV	1	C	G	18	36279	0.0496155	35.6848	msh3	FALSE	CAN	JSY15	1	msh3-Rep1	CCA	C>G	G/C+1	G/C-1	CG>GC	CG>GC	GGGAACCAACGTA	CAACGTA	GGT	CCA	C	C	C>G	C>G_CCA	CG>GC_CAACGTA	6	1189	FALSE	FALSE
24_v.txt	32282	32282-SNV-G-C	SNV	1	G	C	123	36279	0.339039	41.1382	msh3	FALSE	CAN	JSY15	1	msh3-Rep1	CGT	G>C	G/C+1	G/C-1	CG>GC	CG>GC	ACCAACGTAAATA	GTAAATA	GCA	GCA	C	G	C>G	C>G_GCA	CG>GC_GTAAATA	6	1185	FALSE	FALSE
24_v.txt	32292	32292-SNV-G-C	SNV	1	G	C	20	36279	0.0551283	51.55	msh3	FALSE	CAN	JSY15	1	msh3-Rep1	TGA	G>C	G/C+1	G/C-1	CG>GC	CG>GC	ATATTTGAATTTG	GAATTTG	ACT	ACT	C	G	C>G	C>G_ACT	CG>GC_GAATTTG	6	1175	FALSE	FALSE
24_v.txt	32316	32316-SNV-G-C	SNV	1	G	C	27	36279	0.0744232	58.0662	msh3	FALSE	CAN	JSY15	1	msh3-Rep1	TGT	G>C	G/C+1	G/C-1	CG>GC	CG>GC	ATGGTTGTTAAGA	GTTAAGA	ACA	ACA	C	G	C>G	C>G_ACA	CG>GC_GTTAAGA	6	1151	FALSE	FALSE
24_v.txt	32368	32368-SNV-C-G	SNV	1	C	G	4	36279	0.0110257	61.5	msh3	FALSE	CAN	JSY15	1	msh3-Rep1	TCA	C>G	G/C+1	G/C-1	CG>GC	CG>GC	AGTTCTCAATAGC	CAATAGC	AGT	TCA	C	C	C>G	C>G_TCA	CG>GC_CAATAGC	6	1099	FALSE	FALSE
24_v.txt	32432	32432-SNV-G-C	SNV	1	G	C	52	36279	0.143334	55.5192	msh3	FALSE	CAN	JSY15	1	msh3-Rep1	TGT	G>C	G/C+1	G/C-1	CG>GC	CG>GC	GTCATTGTATGGA	GTATGGA	ACA	ACA	C	G	C>G	C>G_ACA	CG>GC_GTATGGA	6	1035	FALSE	FALSE
24_v.txt	32449	32449-SNV-C-G	SNV	1	C	G	80	36279	0.220513	51.825	msh3	FALSE	CAN	JSY15	1	msh3-Rep1	CCA	C>G	G/C+1	G/C-1	CG>GC	CG>GC	AAAGTCCAATGAA	CAATGAA	GGT	CCA	C	C	C>G	C>G_CCA	CG>GC_CAATGAA	6	1018	FALSE	FALSE
24_v.txt	32467	32467-SNV-C-G	SNV	1	C	G	22	36279	0.0606411	47.7696	msh3	FALSE	CAN	JSY15	1	msh3-Rep1	CCA	C>G	G/C+1	G/C-1	CG>GC	CG>GC	GAGAGCCAATGTA	CAATGTA	GGT	CCA	C	C	C>G	C>G_CCA	CG>GC_CAATGTA	6	1000	FALSE	FALSE
24_v.txt	32487	32487-SNV-C-G	SNV	1	C	G	47	36279	0.129552	43.9974	msh3	FALSE	CAN	JSY15	1	msh3-Rep1	ACG	C>G	G/C+1	G/C-1	CG>GC	CG>GC	AAGATACGGAAAA	CGGAAAA	TGC	ACG	C	C	C>G	C>G_ACG	CG>GC_CGGAAAA	6	980	FALSE	FALSE
24_v.txt	32494	32494-SNV-C-G	SNV	1	C	G	22	36278	0.0606428	48.3184	msh3	FALSE	CAN	JSY15	1	msh3-Rep1	ACA	C>G	G/C+1	G/C-1	CG>GC	CG>GC	GGAAAACAACTTT	CAACTTT	TGT	ACA	C	C	C>G	C>G_ACA	CG>GC_CAACTTT	6	973	FALSE	FALSE
24_v.txt	32529	32529-SNV-G-C	SNV	1	G	C	14	36277	0.0385919	40.4987	msh3	FALSE	CAN	JSY15	1	msh3-Rep1	GGG	G>C	G/C+1	G/C-1	CG>GC	CG>GC	TTTCTGGGGTTTG	GGGTTTG	CCC	CCC	C	G	C>G	C>G_CCC	CG>GC_GGGTTTG	6	938	FALSE	FALSE
24_v.txt	32545	32545-SNV-C-G	SNV	1	C	G	3	36279	0.008269	38	msh3	FALSE	CAN	JSY15	1	msh3-Rep1	CCA	C>G	G/C+1	G/C-1	CG>GC	CG>GC	CTTCACCAGCAGT	CAGCAGT	GGT	CCA	C	C	C>G	C>G_CCA	CG>GC_CAGCAGT	6	922	FALSE	FALSE
24_v.txt	32557	32557-SNV-C-G	SNV	1	C	G	108	36265	0.297808	37.6296	msh3	FALSE	CAN	JSY15	1	msh3-Rep1	CCA	C>G	G/C+1	G/C-1	CG>GC	CG>GC	TGATACCAACTAG	CAACTAG	GGT	CCA	C	C	C>G	C>G_CCA	CG>GC_CAACTAG	6	910	FALSE	FALSE
24_v.txt	32566	32566-SNV-C-G	SNV	1	C	G	19	31978	0.0594158	36.9969	msh3	FALSE	CAN	JSY15	1	msh3-Rep1	TCA	C>G	G/C+1	G/C-1	CG>GC	CG>GC	CTAGTTCAGTACC	CAGTACC	AGT	TCA	C	C	C>G	C>G_TCA	CG>GC_CAGTACC	6	901	FALSE	FALSE
24_v.txt	32572	32572-SNV-C-G	SNV	1	C	G	20	31991	0.0625176	34.6002	msh3	FALSE	CAN	JSY15	1	msh3-Rep1	CCT	C>G	G/C+1	G/C-1	CG>GC	CG>GC	CAGTACCTTGAAA	CTTGAAA	GGA	CCT	C	C	C>G	C>G_CCT	CG>GC_CTTGAAA	6	895	FALSE	FALSE
24_v.txt	32575	32575-SNV-G-C	SNV	1	G	C	5	31991	0.0156294	37.999	msh3	FALSE	CAN	JSY15	1	msh3-Rep1	TGA	G>C	G/C+1	G/C-1	CG>GC	CG>GC	TACCTTGAAATGT	GAAATGT	ACT	ACT	C	G	C>G	C>G_ACT	CG>GC_GAAATGT	6	892	FALSE	FALSE
24_v.txt	32580	32580-SNV-G-C	SNV	1	G	C	18	31991	0.0562658	37.9981	msh3	FALSE	CAN	JSY15	1	msh3-Rep1	TGT	G>C	G/C+1	G/C-1	CG>GC	CG>GC	TGAAATGTGAAGG	GTGAAGG	ACA	ACA	C	G	C>G	C>G_ACA	CG>GC_GTGAAGG	6	887	FALSE	FALSE
24_v.txt	32603	32603-SNV-G-C	SNV	1	G	C	1	31991	0.003126	53.9903	msh3	FALSE	CAN	JSY15	1	msh3-Rep1	AGG	G>C	G/C+1	G/C-1	CG>GC	CG>GC	CAAAGAGGAAACC	GGAAACC	TCC	TCC	C	G	C>G	C>G_TCC	CG>GC_GGAAACC	6	864	FALSE	FALSE
24_v.txt	32679	32679-SNV-C-G	SNV	1	C	G	2	32052	0.00624	59.998	msh3	FALSE	CAN	JSY15	1	msh3-Rep1	CCA	C>G	G/C+1	G/C-1	CG>GC	CG>GC	TTTCTCCAATAAC	CAATAAC	GGT	CCA	C	C	C>G	C>G_CCA	CG>GC_CAATAAC	6	788	FALSE	FALSE
24_v.txt	32735	32735-SNV-G-C	SNV	1	G	C	7	32052	0.0218395	63.7143	msh3	FALSE	CAN	JSY15	1	msh3-Rep1	AGT	G>C	G/C+1	G/C-1	CG>GC	CG>GC	AAAACAGTATATT	GTATATT	TCA	TCA	C	G	C>G	C>G_TCA	CG>GC_GTATATT	6	732	FALSE	FALSE
24_v.txt	32776	32776-SNV-C-G	SNV	1	C	G	68	32052	0.212155	45.2794	msh3	FALSE	CAN	JSY15	1	msh3-Rep1	GCG	C>G	G/C+1	G/C-1	CG>GC	CG>GC	TGGAAGCGACCCA	CGACCCA	CGC	GCG	C	C	C>G	C>G_GCG	CG>GC_CGACCCA	6	691	FALSE	FALSE
24_v.txt	32786	32786-SNV-C-G	SNV	1	C	G	11	32052	0.0343192	42.6332	msh3	FALSE	CAN	JSY15	1	msh3-Rep1	ACT	C>G	G/C+1	G/C-1	CG>GC	CG>GC	CCAGAACTCGAAT	CTCGAAT	TGA	ACT	C	C	C>G	C>G_ACT	CG>GC_CTCGAAT	6	681	FALSE	FALSE
24_v.txt	32797	32797-SNV-C-G	SNV	1	C	G	2	32051	0.00624	51	msh3	FALSE	CAN	JSY15	1	msh3-Rep1	CCG	C>G	G/C+1	G/C-1	CG>GC	CG>GC	ATTCACCGTAATA	CGTAATA	GGC	CCG	C	C	C>G	C>G_CCG	CG>GC_CGTAATA	6	670	FALSE	FALSE
24_v.txt	32819	32819-SNV-G-C	SNV	1	G	C	15	32052	0.046799	46.5333	msh3	FALSE	CAN	JSY15	1	msh3-Rep1	AGT	G>C	G/C+1	G/C-1	CG>GC	CG>GC	GAACAAGTTCATT	GTTCATT	TCA	TCA	C	G	C>G	C>G_TCA	CG>GC_GTTCATT	6	648	FALSE	FALSE
24_v.txt	32829	32829-SNV-G-C	SNV	1	G	C	9	32052	0.0280794	39	msh3	FALSE	CAN	JSY15	1	msh3-Rep1	TGT	G>C	G/C+1	G/C-1	CG>GC	CG>GC	ATTATTGTGATAA	GTGATAA	ACA	ACA	C	G	C>G	C>G_ACA	CG>GC_GTGATAA	6	638	FALSE	FALSE
24_v.txt	32876	32876-SNV-G-C	SNV	1	G	C	11	29069	0.037841	35.4545	msh3	FALSE	CAN	JSY15	1	msh3-Rep1	TGT	G>C	G/C+1	G/C-1	CG>GC	CG>GC	AACTTTGTACGTC	GTACGTC	ACA	ACA	C	G	C>G	C>G_ACA	CG>GC_GTACGTC	6	591	FALSE	FALSE
24_v.txt	32900	32900-SNV-G-C	SNV	1	G	C	5	29073	0.0171981	19.6	msh3	FALSE	CAN	JSY15	1	msh3-Rep1	GGC	G>C	G/C+1	G/C-1	CG>GC	CG>GC	GACTTGGCCAACT	GCCAACT	CCG	CCG	C	G	C>G	C>G_CCG	CG>GC_GCCAACT	6	567	FALSE	FALSE
24_v.txt	32917	32917-SNV-C-G	SNV	1	C	G	94	29073	0.323324	52.5209	msh3	FALSE	CAN	JSY15	1	msh3-Rep1	TCC	C>G	G/C+1	G/C-1	CG>GC	CG>GC	TAAGTTCCAGGGC	CCAGGGC	AGG	TCC	C	C	C>G	C>G_TCC	CG>GC_CCAGGGC	6	550	FALSE	FALSE
24_v.txt	32936	32936-SNV-C-G	SNV	1	C	G	27	29072	0.0928729	50.4465	msh3	FALSE	CAN	JSY15	1	msh3-Rep1	CCC	C>G	G/C+1	G/C-1	CG>GC	CG>GC	GATTGCCCAAGAA	CCAAGAA	GGG	CCC	C	C	C>G	C>G_CCC	CG>GC_CCAAGAA	6	531	FALSE	FALSE
24_v.txt	32937	32937-SNV-C-G	SNV	1	C	G	16	29073	0.0550339	54.8158	msh3	FALSE	CAN	JSY15	1	msh3-Rep1	CCA	C>G	G/C+1	G/C-1	CG>GC	CG>GC	ATTGCCCAAGAAA	CAAGAAA	GGT	CCA	C	C	C>G	C>G_CCA	CG>GC_CAAGAAA	6	530	FALSE	FALSE
24_v.txt	32940	32940-SNV-G-C	SNV	1	G	C	7	29073	0.0240773	56.5714	msh3	FALSE	CAN	JSY15	1	msh3-Rep1	AGA	G>C	G/C+1	G/C-1	CG>GC	CG>GC	GCCCAAGAAAACC	GAAAACC	TCT	TCT	C	G	C>G	C>G_TCT	CG>GC_GAAAACC	6	527	FALSE	FALSE
24_v.txt	32959	32959-SNV-C-G	SNV	1	C	G	33	29073	0.113507	61.8122	msh3	FALSE	CAN	JSY15	1	msh3-Rep1	CCA	C>G	G/C+1	G/C-1	CG>GC	CG>GC	TGTAACCATTGGC	CATTGGC	GGT	CCA	C	C	C>G	C>G_CCA	CG>GC_CATTGGC	6	508	FALSE	FALSE
24_v.txt	32971	32971-SNV-C-G	SNV	1	C	G	11	29073	0.0378358	63.9827	msh3	FALSE	CAN	JSY15	1	msh3-Rep1	CCA	C>G	G/C+1	G/C-1	CG>GC	CG>GC	CCGCACCAAATGC	CAAATGC	GGT	CCA	C	C	C>G	C>G_CCA	CG>GC_CAAATGC	6	496	FALSE	FALSE
24_v.txt	32980	32980-SNV-G-C	SNV	1	G	C	14	29073	0.0481546	62.2857	msh3	FALSE	CAN	JSY15	1	msh3-Rep1	GGA	G>C	G/C+1	G/C-1	CG>GC	CG>GC	ATGCTGGAGAAAG	GAGAAAG	CCT	CCT	C	G	C>G	C>G_CCT	CG>GC_GAGAAAG	6	487	FALSE	FALSE
24_v.txt	32997	32997-SNV-G-C	SNV	1	G	C	22	29073	0.0756716	56.6364	msh3	FALSE	CAN	JSY15	1	msh3-Rep1	TGA	G>C	G/C+1	G/C-1	CG>GC	CG>GC	CTTTGTGAGAAAA	GAGAAAA	ACT	ACT	C	G	C>G	C>G_ACT	CG>GC_GAGAAAA	6	470	FALSE	FALSE
24_v.txt	33006	33006-SNV-G-C	SNV	1	G	C	1	29073	0.00344	29	msh3	FALSE	CAN	JSY15	1	msh3-Rep1	TGT	G>C	G/C+1	G/C-1	CG>GC	CG>GC	AAAACTGTGAAAG	GTGAAAG	ACA	ACA	C	G	C>G	C>G_ACA	CG>GC_GTGAAAG	6	461	FALSE	FALSE
24_v.txt	33018	33018-SNV-G-C	SNV	1	G	C	9	29074	0.0309555	64	msh3	FALSE	CAN	JSY15	1	msh3-Rep1	TGT	G>C	G/C+1	G/C-1	CG>GC	CG>GC	GAGGATGTAACAG	GTAACAG	ACA	ACA	C	G	C>G	C>G_ACA	CG>GC_GTAACAG	6	449	FALSE	FALSE
24_v.txt	33056	33056-SNV-C-G	SNV	1	C	G	1	29074	0.003439	63.9985	msh3	FALSE	CAN	JSY15	1	msh3-Rep1	GCG	C>G	G/C+1	G/C-1	CG>GC	CG>GC	GGACTGCGTGACA	CGTGACA	CGC	GCG	C	C	C>G	C>G_GCG	CG>GC_CGTGACA	6	411	FALSE	FALSE
24_v.txt	33070	33070-SNV-C-G	SNV	1	C	G	44	29074	0.151338	48.3182	msh3	FALSE	CAN	JSY15	1	msh3-Rep1	GCC	C>G	G/C+1	G/C-1	CG>GC	CG>GC	AATATGCCAAAGA	CCAAAGA	CGG	GCC	C	C	C>G	C>G_GCC	CG>GC_CCAAAGA	6	397	FALSE	FALSE
24_v.txt	33103	33103-SNV-C-G	SNV	1	C	G	27	29074	0.0928665	40.0737	msh3	FALSE	CAN	JSY15	1	msh3-Rep1	GCG	C>G	G/C+1	G/C-1	CG>GC	CG>GC	TAAGAGCGCCCAC	CGCCCAC	CGC	GCG	C	C	C>G	C>G_GCG	CG>GC_CGCCCAC	6	364	FALSE	FALSE
24_v.txt	33114	33114-SNV-C-G	SNV	1	C	G	3	29074	0.0103185	37	msh3	FALSE	CAN	JSY15	1	msh3-Rep1	GCC	C>G	G/C+1	G/C-1	CG>GC	CG>GC	ACTGGGCCGGCGT	CCGGCGT	CGG	GCC	C	C	C>G	C>G_GCC	CG>GC_CCGGCGT	6	353	FALSE	FALSE
24_v.txt	33115	33115-SNV-C-G	SNV	1	C	G	5	29074	0.0171975	53.6	msh3	FALSE	CAN	JSY15	1	msh3-Rep1	CCG	C>G	G/C+1	G/C-1	CG>GC	CG>GC	CTGGGCCGGCGTT	CGGCGTT	GGC	CCG	C	C	C>G	C>G_CCG	CG>GC_CGGCGTT	6	352	FALSE	FALSE
24_v.txt	33154	33154-SNV-C-G	SNV	1	C	G	117	29074	0.402421	37.5805	msh3	FALSE	CAN	JSY15	1	msh3-Rep1	CCT	C>G	G/C+1	G/C-1	CG>GC	CG>GC	AAAGACCTGTACC	CTGTACC	GGA	CCT	C	C	C>G	C>G_CCT	CG>GC_CTGTACC	6	313	FALSE	FALSE
24_v.txt	33169	33169-SNV-C-G	SNV	1	C	G	11	29022	0.0379023	38	msh3	FALSE	CAN	JSY15	1	msh3-Rep1	CCA	C>G	G/C+1	G/C-1	CG>GC	CG>GC	TAGTACCACCAAG	CACCAAG	GGT	CCA	C	C	C>G	C>G_CCA	CG>GC_CACCAAG	6	298	FALSE	FALSE
24_v.txt	33172	33172-SNV-C-G	SNV	1	C	G	12	29019	0.0413522	37.5833	msh3	FALSE	CAN	JSY15	1	msh3-Rep1	CCA	C>G	G/C+1	G/C-1	CG>GC	CG>GC	TACCACCAAGGGC	CAAGGGC	GGT	CCA	C	C	C>G	C>G_CCA	CG>GC_CAAGGGC	6	295	FALSE	FALSE
24_v.txt	33178	33178-SNV-C-G	SNV	1	C	G	15	29010	0.0517063	36.2	msh3	FALSE	CAN	JSY15	1	msh3-Rep1	GCA	C>G	G/C+1	G/C-1	CG>GC	CG>GC	CAAGGGCAATCAT	CAATCAT	CGT	GCA	C	C	C>G	C>G_GCA	CG>GC_CAATCAT	6	289	FALSE	FALSE
24_v.txt	33187	33187-SNV-C-G	SNV	1	C	G	16	24781	0.0645656	34.75	msh3	FALSE	CAN	JSY15	1	msh3-Rep1	CCA	C>G	G/C+1	G/C-1	CG>GC	CG>GC	TCATACCAATATG	CAATATG	GGT	CCA	C	C	C>G	C>G_CCA	CG>GC_CAATATG	6	280	FALSE	FALSE
24_v.txt	33193	33193-SNV-G-C	SNV	1	G	C	23	24770	0.0928543	36.913	msh3	FALSE	CAN	JSY15	1	msh3-Rep1	TGT	G>C	G/C+1	G/C-1	CG>GC	CG>GC	CAATATGTCTTTG	GTCTTTG	ACA	ACA	C	G	C>G	C>G_ACA	CG>GC_GTCTTTG	6	274	FALSE	FALSE
24_v.txt	33205	33205-SNV-G-C	SNV	1	G	C	58	24799	0.23388	41.5305	msh3	FALSE	CAN	JSY15	1	msh3-Rep1	AGC	G>C	G/C+1	G/C-1	CG>GC	CG>GC	GCTTAAGCTCTCT	GCTCTCT	TCG	TCG	C	G	C>G	C>G_TCG	CG>GC_GCTCTCT	6	262	FALSE	FALSE
24_v.txt	33354	33354-SNV-G-C	SNV	1	G	C	57	24839	0.229478	56.7018	msh3	FALSE	CAN	JSY15	1	msh3-Rep1	TGA	G>C	G/C+1	G/C-1	CG>GC	CG>GC	GGTATTGACCCAC	GACCCAC	ACT	ACT	C	G	C>G	C>G_ACT	CG>GC_GACCCAC	6	113	FALSE	FALSE
24_v.txt	33378	33378-SNV-G-C	SNV	1	G	C	18	24835	0.0724784	55.3333	msh3	FALSE	CAN	JSY15	1	msh3-Rep1	TGA	G>C	G/C+1	G/C-1	CG>GC	CG>GC	GTTTGTGAAGCTT	GAAGCTT	ACT	ACT	C	G	C>G	C>G_ACT	CG>GC_GAAGCTT	6	89	FALSE	FALSE
24_v.txt	33456	33456-SNV-G-C	SNV	1	G	C	31	24835	0.124824	41.5806	msh3	FALSE	CAN	JSY15	1	msh3-Rep1	TGA	G>C	G/C+1	G/C-1	CG>GC	CG>GC	TCTTTTGAATTTG	GAATTTG	ACT	ACT	C	G	C>G	C>G_ACT	CG>GC_GAATTTG	6	11	FALSE	FALSE
24_v.txt	31657	31657-SNV-G-T	SNV	1	G	T	117	14060	0.832148	18.735	msh3	FALSE	CAN	JSY15	1	msh3-Rep1	GGC	G>T	A/T+1	G/C-1	CG>AT	CG>AT	GAAATGGCGTGGA	GCGTGGA	CCG	CCG	C	A	C>A	C>A_CCG	CG>AT_GCGTGGA	6	1810	FALSE	FALSE
24_v.txt	31815	31815-SNV-C-A	SNV	1	C	A	5	14060	0.0355619	21.6	msh3	FALSE	CAN	JSY15	1	msh3-Rep1	TCT	C>A	A/T+1	G/C-1	CG>AT	CG>AT	ATAAATCTGCATC	CTGCATC	AGA	TCT	C	T	C>A	C>A_TCT	CG>AT_CTGCATC	6	1652	FALSE	FALSE
24_v.txt	31817	31817-SNV-G-T	SNV	1	G	T	9	14059	0.0640159	52.2221	msh3	FALSE	CAN	JSY15	1	msh3-Rep1	TGC	G>T	A/T+1	G/C-1	CG>AT	CG>AT	AAATCTGCATCTG	GCATCTG	ACG	ACG	C	A	C>A	C>A_ACG	CG>AT_GCATCTG	6	1650	FALSE	FALSE
24_v.txt	31821	31821-SNV-C-A	SNV	1	C	A	5	14060	0.0355619	27	msh3	FALSE	CAN	JSY15	1	msh3-Rep1	TCT	C>A	A/T+1	G/C-1	CG>AT	CG>AT	CTGCATCTGAATA	CTGAATA	AGA	TCT	C	T	C>A	C>A_TCT	CG>AT_CTGAATA	6	1646	FALSE	FALSE
24_v.txt	31956	31956-SNV-G-T	SNV	1	G	T	21	30746	0.0683016	27.7143	msh3	FALSE	CAN	JSY15	1	msh3-Rep1	TGT	G>T	A/T+1	G/C-1	CG>AT	CG>AT	ATAAATGTGGCCG	GTGGCCG	ACA	ACA	C	A	C>A	C>A_ACA	CG>AT_GTGGCCG	6	1511	FALSE	FALSE
24_v.txt	31979	31979-SNV-G-T	SNV	1	G	T	23	30746	0.0748065	16.3913	msh3	FALSE	CAN	JSY15	1	msh3-Rep1	CGG	G>T	A/T+1	G/C-1	CG>AT	CG>AT	CAAGCCGGGCATT	GGGCATT	GCC	GCC	C	A	C>A	C>A_GCC	CG>AT_GGGCATT	6	1488	FALSE	FALSE
24_v.txt	32008	32008-SNV-C-A	SNV	1	C	A	152	30746	0.494373	52.6864	msh3	FALSE	CAN	JSY15	1	msh3-Rep1	TCG	C>A	A/T+1	G/C-1	CG>AT	CG>AT	GTAACTCGTCACG	CGTCACG	AGC	TCG	C	T	C>A	C>A_TCG	CG>AT_CGTCACG	6	1459	FALSE	FALSE
24_v.txt	32014	32014-SNV-G-T	SNV	1	G	T	8	30746	0.0260196	37.5	msh3	FALSE	CAN	JSY15	1	msh3-Rep1	CGA	G>T	A/T+1	G/C-1	CG>AT	CG>AT	CGTCACGAGAGAT	GAGAGAT	GCT	GCT	C	A	C>A	C>A_GCT	CG>AT_GAGAGAT	6	1453	FALSE	FALSE
24_v.txt	32080	32080-SNV-C-A	SNV	1	C	A	5	30788	0.0162401	17.9994	msh3	FALSE	CAN	JSY15	1	msh3-Rep1	GCA	C>A	A/T+1	G/C-1	CG>AT	CG>AT	ACCATGCAAAAAA	CAAAAAA	CGT	GCA	C	T	C>A	C>A_GCA	CG>AT_CAAAAAA	6	1387	FALSE	FALSE
24_v.txt	32088	32088-SNV-C-A	SNV	1	C	A	15	30788	0.0487203	58.4634	msh3	FALSE	CAN	JSY15	1	msh3-Rep1	GCC	C>A	A/T+1	G/C-1	CG>AT	CG>AT	AAAAAGCCTGCAA	CCTGCAA	CGG	GCC	C	T	C>A	C>A_GCC	CG>AT_CCTGCAA	6	1379	FALSE	FALSE
24_v.txt	32119	32119-SNV-C-A	SNV	1	C	A	38	30788	0.123425	53.6316	msh3	FALSE	CAN	JSY15	1	msh3-Rep1	TCG	C>A	A/T+1	G/C-1	CG>AT	CG>AT	GCCATTCGAAAAC	CGAAAAC	AGC	TCG	C	T	C>A	C>A_TCG	CG>AT_CGAAAAC	6	1348	FALSE	FALSE
24_v.txt	32153	32153-SNV-G-T	SNV	1	G	T	27	30788	0.0876965	49.7778	msh3	FALSE	CAN	JSY15	1	msh3-Rep1	TGT	G>T	A/T+1	G/C-1	CG>AT	CG>AT	CTCCATGTAAGCC	GTAAGCC	ACA	ACA	C	A	C>A	C>A_ACA	CG>AT_GTAAGCC	6	1314	FALSE	FALSE
24_v.txt	32165	32165-SNV-G-T	SNV	1	G	T	5	30788	0.0162401	42.6	msh3	FALSE	CAN	JSY15	1	msh3-Rep1	CGC	G>T	A/T+1	G/C-1	CG>AT	CG>AT	CAAAGCGCCAAAT	GCCAAAT	GCG	GCG	C	A	C>A	C>A_GCG	CG>AT_GCCAAAT	6	1302	FALSE	FALSE
24_v.txt	32195	32195-SNV-G-T	SNV	1	G	T	63	30788	0.204625	44.4127	msh3	FALSE	CAN	JSY15	1	msh3-Rep1	TGT	G>T	A/T+1	G/C-1	CG>AT	CG>AT	TGCAATGTATGGA	GTATGGA	ACA	ACA	C	A	C>A	C>A_ACA	CG>AT_GTATGGA	6	1272	FALSE	FALSE
24_v.txt	32271	32271-SNV-C-A	SNV	1	C	A	49	36281	0.135057	34.2653	msh3	FALSE	CAN	JSY15	1	msh3-Rep1	ACG	C>A	A/T+1	G/C-1	CG>AT	CG>AT	AAAATACGGGAAC	CGGGAAC	TGC	ACG	C	T	C>A	C>A_ACG	CG>AT_CGGGAAC	6	1196	FALSE	FALSE
24_v.txt	32272	32272-SNV-G-T	SNV	1	G	T	16	36281	0.0441002	22.6875	msh3	FALSE	CAN	JSY15	1	msh3-Rep1	CGG	G>T	A/T+1	G/C-1	CG>AT	CG>AT	AAATACGGGAACC	GGGAACC	GCC	GCC	C	A	C>A	C>A_GCC	CG>AT_GGGAACC	6	1195	FALSE	FALSE
24_v.txt	32274	32274-SNV-G-T	SNV	1	G	T	29	36279	0.0799361	33.8963	msh3	FALSE	CAN	JSY15	1	msh3-Rep1	GGA	G>T	A/T+1	G/C-1	CG>AT	CG>AT	ATACGGGAACCAA	GAACCAA	CCT	CCT	C	A	C>A	C>A_CCT	CG>AT_GAACCAA	6	1193	FALSE	FALSE
24_v.txt	32277	32277-SNV-C-A	SNV	1	C	A	21	36279	0.0578847	23.2852	msh3	FALSE	CAN	JSY15	1	msh3-Rep1	ACC	C>A	A/T+1	G/C-1	CG>AT	CG>AT	CGGGAACCAACGT	CCAACGT	TGG	ACC	C	T	C>A	C>A_ACC	CG>AT_CCAACGT	6	1190	FALSE	FALSE
24_v.txt	32282	32282-SNV-G-T	SNV	1	G	T	39	36279	0.1075	37.1795	msh3	FALSE	CAN	JSY15	1	msh3-Rep1	CGT	G>T	A/T+1	G/C-1	CG>AT	CG>AT	ACCAACGTAAATA	GTAAATA	GCA	GCA	C	A	C>A	C>A_GCA	CG>AT_GTAAATA	6	1185	FALSE	FALSE
24_v.txt	32292	32292-SNV-G-T	SNV	1	G	T	27	36279	0.0744232	55.0741	msh3	FALSE	CAN	JSY15	1	msh3-Rep1	TGA	G>T	A/T+1	G/C-1	CG>AT	CG>AT	ATATTTGAATTTG	GAATTTG	ACT	ACT	C	A	C>A	C>A_ACT	CG>AT_GAATTTG	6	1175	FALSE	FALSE
24_v.txt	32304	32304-SNV-G-T	SNV	1	G	T	381	36279	1.05019	57.8176	msh3	FALSE	CAN	JSY15	1	msh3-Rep1	AGA	G>T	A/T+1	G/C-1	CG>AT	CG>AT	GCGGCAGAAATAA	GAAATAA	TCT	TCT	C	A	C>A	C>A_TCT	CG>AT_GAAATAA	6	1163	FALSE	FALSE
24_v.txt	32368	32368-SNV-C-A	SNV	1	C	A	38	36279	0.104744	53.1316	msh3	FALSE	CAN	JSY15	1	msh3-Rep1	TCA	C>A	A/T+1	G/C-1	CG>AT	CG>AT	AGTTCTCAATAGC	CAATAGC	AGT	TCA	C	T	C>A	C>A_TCA	CG>AT_CAATAGC	6	1099	FALSE	FALSE
24_v.txt	32373	32373-SNV-G-T	SNV	1	G	T	76	36279	0.209488	59.3816	msh3	FALSE	CAN	JSY15	1	msh3-Rep1	AGC	G>T	A/T+1	G/C-1	CG>AT	CG>AT	TCAATAGCAATAA	GCAATAA	TCG	TCG	C	A	C>A	C>A_TCG	CG>AT_GCAATAA	6	1094	FALSE	FALSE
24_v.txt	32399	32399-SNV-G-T	SNV	1	G	T	72	36279	0.198462	59.1806	msh3	FALSE	CAN	JSY15	1	msh3-Rep1	CGT	G>T	A/T+1	G/C-1	CG>AT	CG>AT	AGAAACGTAGGAA	GTAGGAA	GCA	GCA	C	A	C>A	C>A_GCA	CG>AT_GTAGGAA	6	1068	FALSE	FALSE
24_v.txt	32432	32432-SNV-G-T	SNV	1	G	T	70	36279	0.192949	57.4429	msh3	FALSE	CAN	JSY15	1	msh3-Rep1	TGT	G>T	A/T+1	G/C-1	CG>AT	CG>AT	GTCATTGTATGGA	GTATGGA	ACA	ACA	C	A	C>A	C>A_ACA	CG>AT_GTATGGA	6	1035	FALSE	FALSE
24_v.txt	32471	32471-SNV-G-T	SNV	1	G	T	49	36279	0.135064	49.6735	msh3	FALSE	CAN	JSY15	1	msh3-Rep1	TGT	G>T	A/T+1	G/C-1	CG>AT	CG>AT	GCCAATGTAGAAG	GTAGAAG	ACA	ACA	C	A	C>A	C>A_ACA	CG>AT_GTAGAAG	6	996	FALSE	FALSE
24_v.txt	32474	32474-SNV-G-T	SNV	1	G	T	37	36279	0.101987	46.6754	msh3	FALSE	CAN	JSY15	1	msh3-Rep1	AGA	G>T	A/T+1	G/C-1	CG>AT	CG>AT	AATGTAGAAGGTT	GAAGGTT	TCT	TCT	C	A	C>A	C>A_TCT	CG>AT_GAAGGTT	6	993	FALSE	FALSE
24_v.txt	32494	32494-SNV-C-A	SNV	1	C	A	57	36278	0.15712	46.8073	msh3	FALSE	CAN	JSY15	1	msh3-Rep1	ACA	C>A	A/T+1	G/C-1	CG>AT	CG>AT	GGAAAACAACTTT	CAACTTT	TGT	ACA	C	T	C>A	C>A_ACA	CG>AT_CAACTTT	6	973	FALSE	FALSE
24_v.txt	32529	32529-SNV-G-T	SNV	1	G	T	188	36277	0.518235	41.7015	msh3	FALSE	CAN	JSY15	1	msh3-Rep1	GGG	G>T	A/T+1	G/C-1	CG>AT	CG>AT	TTTCTGGGGTTTG	GGGTTTG	CCC	CCC	C	A	C>A	C>A_CCC	CG>AT_GGGTTTG	6	938	FALSE	FALSE
24_v.txt	32530	32530-SNV-G-T	SNV	1	G	T	53	36279	0.14609	37.6792	msh3	FALSE	CAN	JSY15	1	msh3-Rep1	GGG	G>T	A/T+1	G/C-1	CG>AT	CG>AT	TTCTGGGGTTTGC	GGTTTGC	CCC	CCC	C	A	C>A	C>A_CCC	CG>AT_GGTTTGC	6	937	FALSE	FALSE
24_v.txt	32545	32545-SNV-C-A	SNV	1	C	A	11	36279	0.0303206	34.2727	msh3	FALSE	CAN	JSY15	1	msh3-Rep1	CCA	C>A	A/T+1	G/C-1	CG>AT	CG>AT	CTTCACCAGCAGT	CAGCAGT	GGT	CCA	C	T	C>A	C>A_CCA	CG>AT_CAGCAGT	6	922	FALSE	FALSE
24_v.txt	32547	32547-SNV-G-T	SNV	1	G	T	68	36275	0.187457	37.4614	msh3	FALSE	CAN	JSY15	1	msh3-Rep1	AGC	G>T	A/T+1	G/C-1	CG>AT	CG>AT	TCACCAGCAGTGA	GCAGTGA	TCG	TCG	C	A	C>A	C>A_TCG	CG>AT_GCAGTGA	6	920	FALSE	FALSE
24_v.txt	32566	32566-SNV-C-A	SNV	1	C	A	23	31978	0.0719244	37.9553	msh3	FALSE	CAN	JSY15	1	msh3-Rep1	TCA	C>A	A/T+1	G/C-1	CG>AT	CG>AT	CTAGTTCAGTACC	CAGTACC	AGT	TCA	C	T	C>A	C>A_TCA	CG>AT_CAGTACC	6	901	FALSE	FALSE
24_v.txt	32580	32580-SNV-G-T	SNV	1	G	T	32	31991	0.100028	33.9059	msh3	FALSE	CAN	JSY15	1	msh3-Rep1	TGT	G>T	A/T+1	G/C-1	CG>AT	CG>AT	TGAAATGTGAAGG	GTGAAGG	ACA	ACA	C	A	C>A	C>A_ACA	CG>AT_GTGAAGG	6	887	FALSE	FALSE
24_v.txt	32585	32585-SNV-G-T	SNV	1	G	T	8	31991	0.025007	26.5	msh3	FALSE	CAN	JSY15	1	msh3-Rep1	AGG	G>T	A/T+1	G/C-1	CG>AT	CG>AT	TGTGAAGGCAGCG	GGCAGCG	TCC	TCC	C	A	C>A	C>A_TCC	CG>AT_GGCAGCG	6	882	FALSE	FALSE
24_v.txt	32603	32603-SNV-G-T	SNV	1	G	T	8	31991	0.025007	33.25	msh3	FALSE	CAN	JSY15	1	msh3-Rep1	AGG	G>T	A/T+1	G/C-1	CG>AT	CG>AT	CAAAGAGGAAACC	GGAAACC	TCC	TCC	C	A	C>A	C>A_TCC	CG>AT_GGAAACC	6	864	FALSE	FALSE
24_v.txt	32629	32629-SNV-C-A	SNV	1	C	A	355	31991	1.10969	55.8439	msh3	FALSE	CAN	JSY15	1	msh3-Rep1	TCG	C>A	A/T+1	G/C-1	CG>AT	CG>AT	TCCCTTCGTTTTT	CGTTTTT	AGC	TCG	C	T	C>A	C>A_TCG	CG>AT_CGTTTTT	6	838	FALSE	FALSE
24_v.txt	32658	32658-SNV-C-A	SNV	1	C	A	12	32052	0.0374392	28.9183	msh3	FALSE	CAN	JSY15	1	msh3-Rep1	ACC	C>A	A/T+1	G/C-1	CG>AT	CG>AT	CCTGGACCCCAGG	CCCCAGG	TGG	ACC	C	T	C>A	C>A_ACC	CG>AT_CCCCAGG	6	809	FALSE	FALSE
24_v.txt	32692	32692-SNV-C-A	SNV	1	C	A	51	32052	0.159116	56.6471	msh3	FALSE	CAN	JSY15	1	msh3-Rep1	CCA	C>A	A/T+1	G/C-1	CG>AT	CG>AT	GGAATCCAACTGG	CAACTGG	GGT	CCA	C	T	C>A	C>A_CCA	CG>AT_CAACTGG	6	775	FALSE	FALSE
24_v.txt	32735	32735-SNV-G-T	SNV	1	G	T	25	32052	0.0779983	58.92	msh3	FALSE	CAN	JSY15	1	msh3-Rep1	AGT	G>T	A/T+1	G/C-1	CG>AT	CG>AT	AAAACAGTATATT	GTATATT	TCA	TCA	C	A	C>A	C>A_TCA	CG>AT_GTATATT	6	732	FALSE	FALSE
24_v.txt	32768	32768-SNV-G-T	SNV	1	G	T	4	32052	0.0124797	59.2298	msh3	FALSE	CAN	JSY15	1	msh3-Rep1	TGA	G>T	A/T+1	G/C-1	CG>AT	CG>AT	AACTTTGATGGAA	GATGGAA	ACT	ACT	C	A	C>A	C>A_ACT	CG>AT_GATGGAA	6	699	FALSE	FALSE
24_v.txt	32786	32786-SNV-C-A	SNV	1	C	A	72	32052	0.224635	50.1913	msh3	FALSE	CAN	JSY15	1	msh3-Rep1	ACT	C>A	A/T+1	G/C-1	CG>AT	CG>AT	CCAGAACTCGAAT	CTCGAAT	TGA	ACT	C	T	C>A	C>A_ACT	CG>AT_CTCGAAT	6	681	FALSE	FALSE
24_v.txt	32788	32788-SNV-C-A	SNV	1	C	A	62	32052	0.193436	41.6452	msh3	FALSE	CAN	JSY15	1	msh3-Rep1	TCG	C>A	A/T+1	G/C-1	CG>AT	CG>AT	AGAACTCGAATTC	CGAATTC	AGC	TCG	C	T	C>A	C>A_TCG	CG>AT_CGAATTC	6	679	FALSE	FALSE
24_v.txt	32794	32794-SNV-C-A	SNV	1	C	A	33	32052	0.102958	40.9091	msh3	FALSE	CAN	JSY15	1	msh3-Rep1	TCA	C>A	A/T+1	G/C-1	CG>AT	CG>AT	CGAATTCACCGTA	CACCGTA	AGT	TCA	C	T	C>A	C>A_TCA	CG>AT_CACCGTA	6	673	FALSE	FALSE
24_v.txt	32797	32797-SNV-C-A	SNV	1	C	A	29	32051	0.0904808	46.8966	msh3	FALSE	CAN	JSY15	1	msh3-Rep1	CCG	C>A	A/T+1	G/C-1	CG>AT	CG>AT	ATTCACCGTAATA	CGTAATA	GGC	CCG	C	T	C>A	C>A_CCG	CG>AT_CGTAATA	6	670	FALSE	FALSE
24_v.txt	32798	32798-SNV-G-T	SNV	1	G	T	32	32052	0.0998378	42.5313	msh3	FALSE	CAN	JSY15	1	msh3-Rep1	CGT	G>T	A/T+1	G/C-1	CG>AT	CG>AT	TTCACCGTAATAT	GTAATAT	GCA	GCA	C	A	C>A	C>A_GCA	CG>AT_GTAATAT	6	669	FALSE	FALSE
24_v.txt	32811	32811-SNV-G-T	SNV	1	G	T	6	32052	0.0187196	46.6656	msh3	FALSE	CAN	JSY15	1	msh3-Rep1	AGG	G>T	A/T+1	G/C-1	CG>AT	CG>AT	TTGACAGGGAACA	GGGAACA	TCC	TCC	C	A	C>A	C>A_TCC	CG>AT_GGGAACA	6	656	FALSE	FALSE
24_v.txt	32812	32812-SNV-G-T	SNV	1	G	T	18	32052	0.0561587	47.3144	msh3	FALSE	CAN	JSY15	1	msh3-Rep1	GGG	G>T	A/T+1	G/C-1	CG>AT	CG>AT	TGACAGGGAACAA	GGAACAA	CCC	CCC	C	A	C>A	C>A_CCC	CG>AT_GGAACAA	6	655	FALSE	FALSE
24_v.txt	32841	32841-SNV-C-A	SNV	1	C	A	7	32052	0.0218395	34.7142	msh3	FALSE	CAN	JSY15	1	msh3-Rep1	CCA	C>A	A/T+1	G/C-1	CG>AT	CG>AT	ATTACCCAAAAAA	CAAAAAA	GGT	CCA	C	T	C>A	C>A_CCA	CG>AT_CAAAAAA	6	626	FALSE	FALSE
24_v.txt	32855	32855-SNV-C-A	SNV	1	C	A	4	32051	0.0124801	38	msh3	FALSE	CAN	JSY15	1	msh3-Rep1	TCC	C>A	A/T+1	G/C-1	CG>AT	CG>AT	ACTAATCCATGCC	CCATGCC	AGG	TCC	C	T	C>A	C>A_TCC	CG>AT_CCATGCC	6	612	FALSE	FALSE
24_v.txt	32883	32883-SNV-C-A	SNV	1	C	A	5	29073	0.0171981	32.2	msh3	FALSE	CAN	JSY15	1	msh3-Rep1	CCA	C>A	A/T+1	G/C-1	CG>AT	CG>AT	TACGTCCAAAATT	CAAAATT	GGT	CCA	C	T	C>A	C>A_CCA	CG>AT_CAAAATT	6	584	FALSE	FALSE
24_v.txt	32928	32928-SNV-G-T	SNV	1	G	T	15	29073	0.0515943	49.3297	msh3	FALSE	CAN	JSY15	1	msh3-Rep1	AGT	G>T	A/T+1	G/C-1	CG>AT	CG>AT	GCAAAAGTGATTG	GTGATTG	TCA	TCA	C	A	C>A	C>A_TCA	CG>AT_GTGATTG	6	539	FALSE	FALSE
24_v.txt	32935	32935-SNV-C-A	SNV	1	C	A	11	29073	0.0378358	34.0014	msh3	FALSE	CAN	JSY15	1	msh3-Rep1	GCC	C>A	A/T+1	G/C-1	CG>AT	CG>AT	TGATTGCCCAAGA	CCCAAGA	CGG	GCC	C	T	C>A	C>A_GCC	CG>AT_CCCAAGA	6	532	FALSE	FALSE
24_v.txt	32940	32940-SNV-G-T	SNV	1	G	T	79	29073	0.27173	47.038	msh3	FALSE	CAN	JSY15	1	msh3-Rep1	AGA	G>T	A/T+1	G/C-1	CG>AT	CG>AT	GCCCAAGAAAACC	GAAAACC	TCT	TCT	C	A	C>A	C>A_TCT	CG>AT_GAAAACC	6	527	FALSE	FALSE
24_v.txt	32958	32958-SNV-C-A	SNV	1	C	A	6	29073	0.0206377	46.331	msh3	FALSE	CAN	JSY15	1	msh3-Rep1	ACC	C>A	A/T+1	G/C-1	CG>AT	CG>AT	ATGTAACCATTGG	CCATTGG	TGG	ACC	C	T	C>A	C>A_ACC	CG>AT_CCATTGG	6	509	FALSE	FALSE
24_v.txt	32997	32997-SNV-G-T	SNV	1	G	T	20	29073	0.0687924	48.05	msh3	FALSE	CAN	JSY15	1	msh3-Rep1	TGA	G>T	A/T+1	G/C-1	CG>AT	CG>AT	CTTTGTGAGAAAA	GAGAAAA	ACT	ACT	C	A	C>A	C>A_ACT	CG>AT_GAGAAAA	6	470	FALSE	FALSE
24_v.txt	33006	33006-SNV-G-T	SNV	1	G	T	58	29073	0.199498	62.3792	msh3	FALSE	CAN	JSY15	1	msh3-Rep1	TGT	G>T	A/T+1	G/C-1	CG>AT	CG>AT	AAAACTGTGAAAG	GTGAAAG	ACA	ACA	C	A	C>A	C>A_ACA	CG>AT_GTGAAAG	6	461	FALSE	FALSE
24_v.txt	33012	33012-SNV-G-T	SNV	1	G	T	42	29074	0.144459	56.3333	msh3	FALSE	CAN	JSY15	1	msh3-Rep1	AGA	G>T	A/T+1	G/C-1	CG>AT	CG>AT	GTGAAAGAGGATG	GAGGATG	TCT	TCT	C	A	C>A	C>A_TCT	CG>AT_GAGGATG	6	455	FALSE	FALSE
24_v.txt	33018	33018-SNV-G-T	SNV	1	G	T	40	29074	0.13758	58.45	msh3	FALSE	CAN	JSY15	1	msh3-Rep1	TGT	G>T	A/T+1	G/C-1	CG>AT	CG>AT	GAGGATGTAACAG	GTAACAG	ACA	ACA	C	A	C>A	C>A_ACA	CG>AT_GTAACAG	6	449	FALSE	FALSE
24_v.txt	33024	33024-SNV-G-T	SNV	1	G	T	33	29074	0.113503	60.2121	msh3	FALSE	CAN	JSY15	1	msh3-Rep1	AGG	G>T	A/T+1	G/C-1	CG>AT	CG>AT	GTAACAGGGATGA	GGGATGA	TCC	TCC	C	A	C>A	C>A_TCC	CG>AT_GGGATGA	6	443	FALSE	FALSE
24_v.txt	33033	33033-SNV-G-T	SNV	1	G	T	22	29074	0.075669	50.2273	msh3	FALSE	CAN	JSY15	1	msh3-Rep1	TGT	G>T	A/T+1	G/C-1	CG>AT	CG>AT	ATGAATGTAGCCA	GTAGCCA	ACA	ACA	C	A	C>A	C>A_ACA	CG>AT_GTAGCCA	6	434	FALSE	FALSE
24_v.txt	33043	33043-SNV-C-A	SNV	1	C	A	48	29074	0.165096	58.4375	msh3	FALSE	CAN	JSY15	1	msh3-Rep1	TCA	C>A	A/T+1	G/C-1	CG>AT	CG>AT	CCATTTCACCCAA	CACCCAA	AGT	TCA	C	T	C>A	C>A_TCA	CG>AT_CACCCAA	6	424	FALSE	FALSE
24_v.txt	33046	33046-SNV-C-A	SNV	1	C	A	8	29074	0.027516	45	msh3	FALSE	CAN	JSY15	1	msh3-Rep1	CCC	C>A	A/T+1	G/C-1	CG>AT	CG>AT	TTTCACCCAAGGA	CCAAGGA	GGG	CCC	C	T	C>A	C>A_CCC	CG>AT_CCAAGGA	6	421	FALSE	FALSE
24_v.txt	33051	33051-SNV-G-T	SNV	1	G	T	58	29074	0.199491	57.4828	msh3	FALSE	CAN	JSY15	1	msh3-Rep1	GGA	G>T	A/T+1	G/C-1	CG>AT	CG>AT	CCCAAGGACTGCG	GACTGCG	CCT	CCT	C	A	C>A	C>A_CCT	CG>AT_GACTGCG	6	416	FALSE	FALSE
24_v.txt	33075	33075-SNV-G-T	SNV	1	G	T	2	29074	0.006879	23.9994	msh3	FALSE	CAN	JSY15	1	msh3-Rep1	AGA	G>T	A/T+1	G/C-1	CG>AT	CG>AT	GCCAAAGAACCCA	GAACCCA	TCT	TCT	C	A	C>A	C>A_TCT	CG>AT_GAACCCA	6	392	FALSE	FALSE
24_v.txt	33114	33114-SNV-C-A	SNV	1	C	A	56	29074	0.192612	42.4821	msh3	FALSE	CAN	JSY15	1	msh3-Rep1	GCC	C>A	A/T+1	G/C-1	CG>AT	CG>AT	ACTGGGCCGGCGT	CCGGCGT	CGG	GCC	C	T	C>A	C>A_GCC	CG>AT_CCGGCGT	6	353	FALSE	FALSE
24_v.txt	33115	33115-SNV-C-A	SNV	1	C	A	15	29074	0.0515925	50	msh3	FALSE	CAN	JSY15	1	msh3-Rep1	CCG	C>A	A/T+1	G/C-1	CG>AT	CG>AT	CTGGGCCGGCGTT	CGGCGTT	GGC	CCG	C	T	C>A	C>A_CCG	CG>AT_CGGCGTT	6	352	FALSE	FALSE
24_v.txt	33151	33151-SNV-G-T	SNV	1	G	T	34	29074	0.116943	39.7942	msh3	FALSE	CAN	JSY15	1	msh3-Rep1	AGA	G>T	A/T+1	G/C-1	CG>AT	CG>AT	TGAAAAGACCTGT	GACCTGT	TCT	TCT	C	A	C>A	C>A_TCT	CG>AT_GACCTGT	6	316	FALSE	FALSE
24_v.txt	33153	33153-SNV-C-A	SNV	1	C	A	49	29074	0.168535	39.1991	msh3	FALSE	CAN	JSY15	1	msh3-Rep1	ACC	C>A	A/T+1	G/C-1	CG>AT	CG>AT	AAAAGACCTGTAC	CCTGTAC	TGG	ACC	C	T	C>A	C>A_ACC	CG>AT_CCTGTAC	6	314	FALSE	FALSE
24_v.txt	33159	33159-SNV-C-A	SNV	1	C	A	27	29074	0.0928665	37.3704	msh3	FALSE	CAN	JSY15	1	msh3-Rep1	ACC	C>A	A/T+1	G/C-1	CG>AT	CG>AT	CCTGTACCAATAG	CCAATAG	TGG	ACC	C	T	C>A	C>A_ACC	CG>AT_CCAATAG	6	308	FALSE	FALSE
24_v.txt	33169	33169-SNV-C-A	SNV	1	C	A	41	29022	0.141272	37.6341	msh3	FALSE	CAN	JSY15	1	msh3-Rep1	CCA	C>A	A/T+1	G/C-1	CG>AT	CG>AT	TAGTACCACCAAG	CACCAAG	GGT	CCA	C	T	C>A	C>A_CCA	CG>AT_CACCAAG	6	298	FALSE	FALSE
24_v.txt	33208	33208-SNV-C-A	SNV	1	C	A	51	24799	0.205653	42.0305	msh3	FALSE	CAN	JSY15	1	msh3-Rep1	TCT	C>A	A/T+1	G/C-1	CG>AT	CG>AT	TAAGCTCTCTCTT	CTCTCTT	AGA	TCT	C	T	C>A	C>A_TCT	CG>AT_CTCTCTT	6	259	FALSE	FALSE
24_v.txt	33220	33220-SNV-C-A	SNV	1	C	A	32	24799	0.129037	39.8438	msh3	FALSE	CAN	JSY15	1	msh3-Rep1	TCA	C>A	A/T+1	G/C-1	CG>AT	CG>AT	TCACTTCAGCGTT	CAGCGTT	AGT	TCA	C	T	C>A	C>A_TCA	CG>AT_CAGCGTT	6	247	FALSE	FALSE
24_v.txt	33235	33235-SNV-C-A	SNV	1	C	A	43	24839	0.173115	34.4419	msh3	FALSE	CAN	JSY15	1	msh3-Rep1	TCT	C>A	A/T+1	G/C-1	CG>AT	CG>AT	GTACTTCTCCTTC	CTCCTTC	AGA	TCT	C	T	C>A	C>A_TCT	CG>AT_CTCCTTC	6	232	FALSE	FALSE
24_v.txt	33241	33241-SNV-C-A	SNV	1	C	A	15	24839	0.0603889	43.1333	msh3	FALSE	CAN	JSY15	1	msh3-Rep1	TCA	C>A	A/T+1	G/C-1	CG>AT	CG>AT	CTCCTTCATCTTC	CATCTTC	AGT	TCA	C	T	C>A	C>A_TCA	CG>AT_CATCTTC	6	226	FALSE	FALSE
24_v.txt	33265	33265-SNV-C-A	SNV	1	C	A	47	24839	0.189219	43.383	msh3	FALSE	CAN	JSY15	1	msh3-Rep1	TCC	C>A	A/T+1	G/C-1	CG>AT	CG>AT	CATCCTCCATAGA	CCATAGA	AGG	TCC	C	T	C>A	C>A_TCC	CG>AT_CCATAGA	6	202	FALSE	FALSE
24_v.txt	33283	33283-SNV-C-A	SNV	1	C	A	192	24839	0.772978	48.3854	msh3	FALSE	CAN	JSY15	1	msh3-Rep1	TCG	C>A	A/T+1	G/C-1	CG>AT	CG>AT	TATCCTCGCCATT	CGCCATT	AGC	TCG	C	T	C>A	C>A_TCG	CG>AT_CGCCATT	6	184	FALSE	FALSE
24_v.txt	33325	33325-SNV-C-A	SNV	1	C	A	35	24839	0.140907	53.1714	msh3	FALSE	CAN	JSY15	1	msh3-Rep1	TCT	C>A	A/T+1	G/C-1	CG>AT	CG>AT	ACAATTCTTTACT	CTTTACT	AGA	TCT	C	T	C>A	C>A_TCT	CG>AT_CTTTACT	6	142	FALSE	FALSE
24_v.txt	33354	33354-SNV-G-T	SNV	1	G	T	159	24839	0.640122	22.1509	msh3	FALSE	CAN	JSY15	1	msh3-Rep1	TGA	G>T	A/T+1	G/C-1	CG>AT	CG>AT	GGTATTGACCCAC	GACCCAC	ACT	ACT	C	A	C>A	C>A_ACT	CG>AT_GACCCAC	6	113	FALSE	FALSE
24_v.txt	33360	33360-SNV-C-A	SNV	1	C	A	120	24839	0.483111	55.5297	msh3	FALSE	CAN	JSY15	1	msh3-Rep1	ACG	C>A	A/T+1	G/C-1	CG>AT	CG>AT	GACCCACGTCTGT	CGTCTGT	TGC	ACG	C	T	C>A	C>A_ACG	CG>AT_CGTCTGT	6	107	FALSE	FALSE
24_v.txt	33385	33385-SNV-C-A	SNV	1	C	A	19	24835	0.0765049	40.5789	msh3	FALSE	CAN	JSY15	1	msh3-Rep1	TCA	C>A	A/T+1	G/C-1	CG>AT	CG>AT	AAGCTTCAACGTC	CAACGTC	AGT	TCA	C	T	C>A	C>A_TCA	CG>AT_CAACGTC	6	82	FALSE	FALSE
24_v.txt	33415	33415-SNV-C-A	SNV	1	C	A	33	24835	0.132877	37.8182	msh3	FALSE	CAN	JSY15	1	msh3-Rep1	TCA	C>A	A/T+1	G/C-1	CG>AT	CG>AT	CCGGCTCATTGTA	CATTGTA	AGT	TCA	C	T	C>A	C>A_TCA	CG>AT_CATTGTA	6	52	FALSE	FALSE
24_v.txt	33433	33433-SNV-C-A	SNV	1	C	A	290	24835	1.16771	43.431	msh3	FALSE	CAN	JSY15	1	msh3-Rep1	TCC	C>A	A/T+1	G/C-1	CG>AT	CG>AT	GCTTCTCCTCTAT	CCTCTAT	AGG	TCC	C	T	C>A	C>A_TCC	CG>AT_CCTCTAT	6	34	FALSE	FALSE
24_v.txt	33451	33451-SNV-C-A	SNV	1	C	A	18	24835	0.0724784	40.2778	msh3	FALSE	CAN	JSY15	1	msh3-Rep1	TCT	C>A	A/T+1	G/C-1	CG>AT	CG>AT	CGTCTTCTTTTGA	CTTTTGA	AGA	TCT	C	T	C>A	C>A_TCT	CG>AT_CTTTTGA	6	16	FALSE	FALSE
24_v.txt	33456	33456-SNV-G-T	SNV	1	G	T	33	24835	0.132877	22.6667	msh3	FALSE	CAN	JSY15	1	msh3-Rep1	TGA	G>T	A/T+1	G/C-1	CG>AT	CG>AT	TCTTTTGAATTTG	GAATTTG	ACT	ACT	C	A	C>A	C>A_ACT	CG>AT_GAATTTG	6	11	FALSE	FALSE
24_v.txt	33474	33474-SNV-C-A	SNV	1	C	A	27	24833	0.108726	31.7407	msh3	FALSE	CAN	JSY15	1	msh3-Rep1	GCC	C>A	A/T+1	G/C-1	CG>AT	CG>AT	GCTATGCCTTTTT	CCTTTTT	CGG	GCC	C	T	C>A	C>A_GCC	CG>AT_CCTTTTT	6	N_A	FALSE	FALSE
24_v.txt	32080	32080-Replacement-C-AA	Replacement	2	C	AA	19	30788	0.0617124	62.8684	msh3	FALSE	CAN	JSY15	1	msh3-Rep1	GCA	nope	>1bp-ins	G/C-1	none	Replac.	ACCATGCAAAAAA	CAAAAAA	CGT	GCA	C	none	nope	nope_GCA	Replac._CAAAAAA	6	1387	FALSE	FALSE
24_v.txt	32080	32080-Replacement-CA-T	Replacement	2	CA	T	1	30788	0.003248	64	msh3	FALSE	CAN	JSY15	1	msh3-Rep1	GCA	nope	A/T+1	>1bpdel	none	Replac.	ACCATGCAAAAAA	CAAAAAA	CGT	GCA	CA	A	NA	NA_GCA	Replac._CAAAAAA	6	1387	FALSE	FALSE
24_v.txt	32094	32094-Replacement-AC-G	Replacement	2	AC	G	1	30788	0.003248	62	msh3	FALSE	CAN	JSY15	1	msh3-Rep1	AAC	nope	G/C+1	>1bpdel	none	Replac.	CCTGCAACACCAG	ACACCAG	TTG	AAC	AC	C	NA	NA_AAC	Replac._ACACCAG	6	1373	FALSE	FALSE
24_v.txt	32271	32271-Replacement-CG-T	Replacement	2	CG	T	1	36281	0.002756	38	msh3	FALSE	CAN	JSY15	1	msh3-Rep1	ACG	nope	A/T+1	>1bpdel	none	Replac.	AAAATACGGGAAC	CGGGAAC	TGC	ACG	CG	A	NA	NA_ACG	Replac._CGGGAAC	6	1196	FALSE	FALSE
24_v.txt	32337	32337-Replacement-AT-G	Replacement	2	AT	G	1	36279	0.002756	64	msh3	FALSE	CAN	JSY15	1	msh3-Rep1	GAT	nope	G/C+1	>1bpdel	none	Replac.	TTGAAGATATGTG	ATATGTG	CTA	GAT	AT	C	NA	NA_GAT	Replac._ATATGTG	6	1130	FALSE	FALSE
24_v.txt	32527	32527-Replacement-TG-C	Replacement	2	TG	C	1	36279	0.002756	22	msh3	FALSE	CAN	JSY15	1	msh3-Rep1	CTG	nope	G/C+1	>1bpdel	none	Replac.	ATTTTCTGGGGTT	TGGGGTT	GAC	CTG	TG	G	NA	NA_CTG	Replac._TGGGGTT	6	940	FALSE	FALSE
24_v.txt	32608	32608-Replacement-CCC-A	Replacement	3	CCC	A	15	31991	0.0468882	46.8889	msh3	FALSE	CAN	JSY15	1	msh3-Rep1	ACC	nope	A/T+1	>1bpdel	none	Replac.	AGGAAACCCAACC	CCCAACC	TGG	ACC	CCC	T	NA	NA_ACC	Replac._CCCAACC	6	859	FALSE	FALSE
24_v.txt	32841	32841-Replacement-C-AA	Replacement	2	C	AA	21	32052	0.0655185	44.0714	msh3	FALSE	CAN	JSY15	1	msh3-Rep1	CCA	nope	>1bp-ins	G/C-1	none	Replac.	ATTACCCAAAAAA	CAAAAAA	GGT	CCA	C	none	nope	nope_CCA	Replac._CAAAAAA	6	626	FALSE	FALSE
24_v.txt	33206	33206-Replacement-CTC-A	Replacement	3	CTC	A	20	24799	0.0806484	39.5667	msh3	FALSE	CAN	JSY15	1	msh3-Rep1	GCT	nope	A/T+1	>1bpdel	none	Replac.	CTTAAGCTCTCTC	CTCTCTC	CGA	GCT	CTC	T	NA	NA_GCT	Replac._CTCTCTC	6	261	FALSE	FALSE
24_v.txt	32277	32277-MNV-CC-TA	MNV	2	CC	TA	32	36279	0.0882053	37.328	msh3	FALSE	CAN	JSY15	1	msh3-Rep1	ACC	nope	>1bp-ins	>1bpdel	none	MNV	CGGGAACCAACGT	CCAACGT	TGG	ACC	CC	none	NA	NA_ACC	MNV_CCAACGT	6	1190	FALSE	FALSE
24_v.txt	32528	32528-MNV-GGG-TCT	MNV	3	GGG	TCT	1	36279	0.002756	14.3333	msh3	FALSE	CAN	JSY15	1	msh3-Rep1	TGG	nope	>1bp-ins	>1bpdel	none	MNV	TTTTCTGGGGTTT	GGGGTTT	ACC	TGG	GGG	none	NA	NA_TGG	MNV_GGGGTTT	6	939	FALSE	FALSE
24_v.txt	32629	32629-MNV-CG-AT	MNV	2	CG	AT	1	31991	0.003126	34	msh3	FALSE	CAN	JSY15	1	msh3-Rep1	TCG	nope	>1bp-ins	>1bpdel	none	MNV	TCCCTTCGTTTTT	CGTTTTT	AGC	TCG	CG	none	NA	NA_TCG	MNV_CGTTTTT	6	838	FALSE	FALSE
24_v.txt	32767	32767-MNV-TG-AT	MNV	2	TG	AT	36	32052	0.112317	48.3333	msh3	FALSE	CAN	JSY15	1	msh3-Rep1	TTG	nope	>1bp-ins	>1bpdel	none	MNV	AAACTTTGATGGA	TGATGGA	AAC	TTG	TG	none	NA	NA_TTG	MNV_TGATGGA	6	700	FALSE	FALSE
24_v.txt	32796	32796-MNV-CC-AA	MNV	2	CC	AA	1	32052	0.00312	31.5	msh3	FALSE	CAN	JSY15	1	msh3-Rep1	ACC	nope	>1bp-ins	>1bpdel	none	MNV	AATTCACCGTAAT	CCGTAAT	TGG	ACC	CC	none	NA	NA_ACC	MNV_CCGTAAT	6	671	FALSE	FALSE
24_v.txt	32798	32798-MNV-GT-CG	MNV	2	GT	CG	1	32052	0.00312	20.5	msh3	FALSE	CAN	JSY15	1	msh3-Rep1	CGT	nope	>1bp-ins	>1bpdel	none	MNV	TTCACCGTAATAT	GTAATAT	GCA	CGT	GT	none	NA	NA_CGT	MNV_GTAATAT	6	669	FALSE	FALSE
24_v.txt	33114	33114-MNV-CC-TT	MNV	2	CC	TT	1	29074	0.003439	38	msh3	FALSE	CAN	JSY15	1	msh3-Rep1	GCC	nope	>1bp-ins	>1bpdel	none	MNV	ACTGGGCCGGCGT	CCGGCGT	CGG	GCC	CC	none	NA	NA_GCC	MNV_CCGGCGT	6	353	FALSE	FALSE
24_v.txt	33168	33168-MNV-CC-AA	MNV	2	CC	AA	1	29022	0.003446	30.5	msh3	FALSE	CAN	JSY15	1	msh3-Rep1	ACC	nope	>1bp-ins	>1bpdel	none	MNV	ATAGTACCACCAA	CCACCAA	TGG	ACC	CC	none	NA	NA_ACC	MNV_CCACCAA	6	299	FALSE	FALSE
24_v.txt	31868	31868-Insertion---AG	Insertion	2	-	AG	13	14060	0.0924609	41.0385	msh3	FALSE	CAN	JSY15	1	msh3-Rep1	TAG	nope	>1bp-ins	>1bpdel	none	>1bp-ins	GAAAATAGAGATA	AGAGATA	ATC	TAG	-	none	NA	NA_TAG	>1bp-ins_AGAGATA	6	1599	FALSE	FALSE
24_v.txt	31880	31880-Insertion---A	Insertion	1	-	A	1	14060	0.007112	38	msh3	FALSE	CAN	JSY15	1	msh3-Rep1	CGG	nope	A/T+1	>1bpdel	none	A/T+1	ATAGGCGGCAGCA	GGCAGCA	GCC	CGG	-	T	NA	NA_CGG	A/T+1_GGCAGCA	6	1587	FALSE	FALSE
24_v.txt	31880	31880-Insertion---G	Insertion	1	-	G	7	14060	0.0497866	44.5714	msh3	FALSE	CAN	JSY15	1	msh3-Rep1	CGG	nope	G/C+1	>1bpdel	none	G/C+1	ATAGGCGGCAGCA	GGCAGCA	GCC	CGG	-	C	NA	NA_CGG	G/C+1_GGCAGCA	6	1587	FALSE	FALSE
24_v.txt	31900	31900-Insertion---TGAATTTTGG	Insertion	10	-	TGAATTTTGG	7	13964	0.0501289	44.6143	msh3	FALSE	CAN	JSY15	1	msh3-Rep1	TTG	nope	>1bp-ins	>1bpdel	none	>1bp-ins	CACCATTGAATTT	TGAATTT	AAC	TTG	-	none	NA	NA_TTG	>1bp-ins_TGAATTT	6	1567	FALSE	FALSE
24_v.txt	31952	31952-Insertion---A	Insertion	1	-	A	11	30746	0.035777	37.8182	msh3	FALSE	CAN	JSY15	1	msh3-Rep1	TAA	nope	A/T+1	>1bpdel	none	A/T+1	CGTCATAAATGTG	AAATGTG	ATT	TAA	-	T	NA	NA_TAA	A/T+1_AAATGTG	6	1515	FALSE	FALSE
24_v.txt	31969	31969-Insertion---A	Insertion	1	-	A	5	30746	0.0162623	37.8	msh3	FALSE	CAN	JSY15	1	msh3-Rep1	TAA	nope	A/T+1	>1bpdel	none	A/T+1	CATAATAAGCCAA	AAGCCAA	ATT	TAA	-	T	NA	NA_TAA	A/T+1_AAGCCAA	6	1498	FALSE	FALSE
24_v.txt	32014	32014-Insertion---GA	Insertion	2	-	GA	5	30746	0.0162623	56	msh3	FALSE	CAN	JSY15	1	msh3-Rep1	CGA	nope	>1bp-ins	>1bpdel	none	>1bp-ins	CGTCACGAGAGAT	GAGAGAT	GCT	CGA	-	none	NA	NA_CGA	>1bp-ins_GAGAGAT	6	1453	FALSE	FALSE
24_v.txt	32058	32058-Insertion---GAGATT	Insertion	6	-	GAGATT	29	30788	0.0941925	63.3046	msh3	FALSE	CAN	JSY15	1	msh3-Rep1	CGA	nope	>1bp-ins	>1bpdel	none	>1bp-ins	ATGTGCGAGATTG	GAGATTG	GCT	CGA	-	none	NA	NA_CGA	>1bp-ins_GAGATTG	6	1409	FALSE	FALSE
24_v.txt	32081	32081-Insertion---A	Insertion	1	-	A	62	30788	0.201377	62.3065	msh3	FALSE	CAN	JSY15	1	msh3-Rep1	CAA	nope	A/T+1	>1bpdel	none	A/T+1	CCATGCAAAAAAG	AAAAAAG	GTT	CAA	-	T	NA	NA_CAA	A/T+1_AAAAAAG	6	1386	FALSE	FALSE
24_v.txt	32155	32155-Insertion---AAGCC	Insertion	5	-	AAGCC	27	30788	0.0876965	49.1111	msh3	FALSE	CAN	JSY15	1	msh3-Rep1	TAA	nope	>1bp-ins	>1bpdel	none	>1bp-ins	CCATGTAAGCCAA	AAGCCAA	ATT	TAA	-	none	NA	NA_TAA	>1bp-ins_AAGCCAA	6	1312	FALSE	FALSE
24_v.txt	32168	32168-Insertion---A	Insertion	1	-	A	9	30788	0.0292322	49.4444	msh3	FALSE	CAN	JSY15	1	msh3-Rep1	CAA	nope	A/T+1	>1bpdel	none	A/T+1	AGCGCCAAATGCA	AAATGCA	GTT	CAA	-	T	NA	NA_CAA	A/T+1_AAATGCA	6	1299	FALSE	FALSE
24_v.txt	32305	32305-Insertion---A	Insertion	1	-	A	41	36279	0.113013	59.8537	msh3	FALSE	CAN	JSY15	1	msh3-Rep1	GAA	nope	A/T+1	>1bpdel	none	A/T+1	CGGCAGAAATAAT	AAATAAT	CTT	GAA	-	T	NA	NA_GAA	A/T+1_AAATAAT	6	1162	FALSE	FALSE
24_v.txt	32309	32309-Insertion---A	Insertion	1	-	A	11	36279	0.0303206	55.3636	msh3	FALSE	CAN	JSY15	1	msh3-Rep1	TAA	nope	A/T+1	>1bpdel	none	A/T+1	AGAAATAATGGTT	AATGGTT	ATT	TAA	-	T	NA	NA_TAA	A/T+1_AATGGTT	6	1158	FALSE	FALSE
24_v.txt	32345	32345-Insertion---T	Insertion	1	-	T	5	36279	0.0137821	55.4	msh3	FALSE	CAN	JSY15	1	msh3-Rep1	GCA	nope	A/T+1	>1bpdel	none	A/T+1	ATGTGGCAAAACC	CAAAACC	CGT	GCA	-	A	NA	NA_GCA	A/T+1_CAAAACC	6	1122	FALSE	FALSE
24_v.txt	32381	32381-Insertion---A	Insertion	1	-	A	1	36279	0.002756	64	msh3	FALSE	CAN	JSY15	1	msh3-Rep1	TAA	nope	A/T+1	>1bpdel	none	A/T+1	AATAATAAAGGGA	AAAGGGA	ATT	TAA	-	T	NA	NA_TAA	A/T+1_AAAGGGA	6	1086	FALSE	FALSE
24_v.txt	32381	32381-Insertion---AAAGGGAGAAGTAG	Insertion	14	-	AAAGGGAGAAGTAG	11	36279	0.0303206	60.6558	msh3	FALSE	CAN	JSY15	1	msh3-Rep1	TAA	nope	>1bp-ins	>1bpdel	none	>1bp-ins	AATAATAAAGGGA	AAAGGGA	ATT	TAA	-	none	NA	NA_TAA	>1bp-ins_AAAGGGA	6	1086	FALSE	FALSE
24_v.txt	32457	32457-Insertion---A	Insertion	1	-	A	1	36279	0.002756	64	msh3	FALSE	CAN	JSY15	1	msh3-Rep1	TAA	nope	A/T+1	>1bpdel	none	A/T+1	ATGAATAATAGAG	AATAGAG	ATT	TAA	-	T	NA	NA_TAA	A/T+1_AATAGAG	6	1010	FALSE	FALSE
24_v.txt	32490	32490-Insertion---A	Insertion	1	-	A	23	36279	0.0633976	47.6957	msh3	FALSE	CAN	JSY15	1	msh3-Rep1	GAA	nope	A/T+1	>1bpdel	none	A/T+1	ATACGGAAAACAA	AAAACAA	CTT	GAA	-	T	NA	NA_GAA	A/T+1_AAAACAA	6	977	FALSE	FALSE
24_v.txt	32498	32498-Insertion---T	Insertion	1	-	T	94	36279	0.259103	44.6351	msh3	FALSE	CAN	JSY15	1	msh3-Rep1	CTT	nope	A/T+1	>1bpdel	none	A/T+1	AACAACTTTTTTG	TTTTTTG	GAA	CTT	-	A	NA	NA_CTT	A/T+1_TTTTTTG	6	969	FALSE	FALSE
24_v.txt	32527	32527-Insertion---T	Insertion	1	-	T	1	36279	0.002756	64	msh3	FALSE	CAN	JSY15	1	msh3-Rep1	CTG	nope	A/T+1	>1bpdel	none	A/T+1	ATTTTCTGGGGTT	TGGGGTT	GAC	CTG	-	A	NA	NA_CTG	A/T+1_TGGGGTT	6	940	FALSE	FALSE
24_v.txt	32528	32528-Insertion---G	Insertion	1	-	G	1	36279	0.002756	38	msh3	FALSE	CAN	JSY15	1	msh3-Rep1	TGG	nope	G/C+1	>1bpdel	none	G/C+1	TTTTCTGGGGTTT	GGGGTTT	ACC	TGG	-	C	NA	NA_TGG	G/C+1_GGGGTTT	6	939	FALSE	FALSE
24_v.txt	32556	32556-Insertion---C	Insertion	1	-	C	6	36267	0.016544	37.6667	msh3	FALSE	CAN	JSY15	1	msh3-Rep1	ACC	nope	G/C+1	>1bpdel	none	G/C+1	GTGATACCAACTA	CCAACTA	TGG	ACC	-	G	NA	NA_ACC	G/C+1_CCAACTA	6	911	FALSE	FALSE
24_v.txt	32603	32603-Insertion---G	Insertion	1	-	G	1	31991	0.003126	37	msh3	FALSE	CAN	JSY15	1	msh3-Rep1	AGG	nope	G/C+1	>1bpdel	none	G/C+1	CAAAGAGGAAACC	GGAAACC	TCC	AGG	-	C	NA	NA_AGG	G/C+1_GGAAACC	6	864	FALSE	FALSE
24_v.txt	32631	32631-Insertion---T	Insertion	1	-	T	30	31991	0.0937764	50.7667	msh3	FALSE	CAN	JSY15	1	msh3-Rep1	GTT	nope	A/T+1	>1bpdel	none	A/T+1	CCTTCGTTTTTAT	TTTTTAT	CAA	GTT	-	A	NA	NA_GTT	A/T+1_TTTTTAT	6	836	FALSE	FALSE
24_v.txt	32648	32648-Insertion---TATA	Insertion	4	-	TATA	5	31991	0.0156294	63.35	msh3	FALSE	CAN	JSY15	1	msh3-Rep1	TTA	nope	>1bp-ins	>1bpdel	none	>1bp-ins	AGATATTATACCT	TATACCT	AAT	TTA	-	none	NA	NA_TTA	>1bp-ins_TATACCT	6	819	FALSE	FALSE
24_v.txt	32650	32650-Insertion---T	Insertion	1	-	T	26	31991	0.0812729	53.8077	msh3	FALSE	CAN	JSY15	1	msh3-Rep1	ATA	nope	A/T+1	>1bpdel	none	A/T+1	ATATTATACCTGG	TACCTGG	TAT	ATA	-	A	NA	NA_ATA	A/T+1_TACCTGG	6	817	FALSE	FALSE
24_v.txt	32658	32658-Insertion---C	Insertion	1	-	C	27	32052	0.0842381	62	msh3	FALSE	CAN	JSY15	1	msh3-Rep1	ACC	nope	G/C+1	>1bpdel	none	G/C+1	CCTGGACCCCAGG	CCCCAGG	TGG	ACC	-	G	NA	NA_ACC	G/C+1_CCCCAGG	6	809	FALSE	FALSE
24_v.txt	32677	32677-Insertion---T	Insertion	1	-	T	69	32052	0.215275	63.3768	msh3	FALSE	CAN	JSY15	1	msh3-Rep1	CTC	nope	A/T+1	>1bpdel	none	A/T+1	GGTTTCTCCAATA	TCCAATA	GAG	CTC	-	A	NA	NA_CTC	A/T+1_TCCAATA	6	790	FALSE	FALSE
24_v.txt	32685	32685-Insertion---C	Insertion	1	-	C	1	32052	0.00312	9	msh3	FALSE	CAN	JSY15	1	msh3-Rep1	ACG	nope	G/C+1	>1bpdel	none	G/C+1	CAATAACGGAATC	CGGAATC	TGC	ACG	-	G	NA	NA_ACG	G/C+1_CGGAATC	6	782	FALSE	FALSE
24_v.txt	32685	32685-Insertion---CGGAATCCAACTGGGC	Insertion	16	-	CGGAATCCAACTGGGC	21	32052	0.0655185	61.0565	msh3	FALSE	CAN	JSY15	1	msh3-Rep1	ACG	nope	>1bp-ins	>1bpdel	none	>1bp-ins	CAATAACGGAATC	CGGAATC	TGC	ACG	-	none	NA	NA_ACG	>1bp-ins_CGGAATC	6	782	FALSE	FALSE
24_v.txt	32842	32842-Insertion---A	Insertion	1	-	A	174	32052	0.542868	42.6552	msh3	FALSE	CAN	JSY15	1	msh3-Rep1	CAA	nope	A/T+1	>1bpdel	none	A/T+1	TTACCCAAAAAAT	AAAAAAT	GTT	CAA	-	T	NA	NA_CAA	A/T+1_AAAAAAT	6	625	FALSE	FALSE
24_v.txt	33000	33000-Insertion---A	Insertion	1	-	A	4	29073	0.0137585	57.25	msh3	FALSE	CAN	JSY15	1	msh3-Rep1	GAA	nope	A/T+1	>1bpdel	none	A/T+1	TGTGAGAAAACTG	AAAACTG	CTT	GAA	-	T	NA	NA_GAA	A/T+1_AAAACTG	6	467	FALSE	FALSE
24_v.txt	33072	33072-Insertion---A	Insertion	1	-	A	5	29074	0.0171975	47	msh3	FALSE	CAN	JSY15	1	msh3-Rep1	CAA	nope	A/T+1	>1bpdel	none	A/T+1	TATGCCAAAGAAC	AAAGAAC	GTT	CAA	-	T	NA	NA_CAA	A/T+1_AAAGAAC	6	395	FALSE	FALSE
24_v.txt	33081	33081-Insertion---ATAA	Insertion	4	-	ATAA	84	29074	0.288918	54.2798	msh3	FALSE	CAN	JSY15	1	msh3-Rep1	CAT	nope	>1bp-ins	>1bpdel	none	>1bp-ins	GAACCCATAAATA	ATAAATA	GTA	CAT	-	none	NA	NA_CAT	>1bp-ins_ATAAATA	6	386	FALSE	FALSE
24_v.txt	33091	33091-Insertion---A	Insertion	1	-	A	33	29074	0.113503	50.6667	msh3	FALSE	CAN	JSY15	1	msh3-Rep1	TAT	nope	A/T+1	>1bpdel	none	A/T+1	ATAAATATGATAT	ATGATAT	ATA	TAT	-	T	NA	NA_TAT	A/T+1_ATGATAT	6	376	FALSE	FALSE
24_v.txt	33147	33147-Insertion---A	Insertion	1	-	A	10	29074	0.034395	43.2	msh3	FALSE	CAN	JSY15	1	msh3-Rep1	GAA	nope	A/T+1	>1bpdel	none	A/T+1	CCAATGAAAAGAC	AAAAGAC	CTT	GAA	-	T	NA	NA_GAA	A/T+1_AAAAGAC	6	320	FALSE	FALSE
24_v.txt	33206	33206-Insertion---CT	Insertion	2	-	CT	68	24799	0.274205	37.9044	msh3	FALSE	CAN	JSY15	1	msh3-Rep1	GCT	nope	>1bp-ins	>1bpdel	none	>1bp-ins	CTTAAGCTCTCTC	CTCTCTC	CGA	GCT	-	none	NA	NA_GCT	>1bp-ins_CTCTCTC	6	261	FALSE	FALSE
24_v.txt	33212	33212-Insertion---CTTCA	Insertion	5	-	CTTCA	15	24799	0.0604863	37.4267	msh3	FALSE	CAN	JSY15	1	msh3-Rep1	TCT	nope	>1bp-ins	>1bpdel	none	>1bp-ins	CTCTCTCTTCACT	CTTCACT	AGA	TCT	-	none	NA	NA_TCT	>1bp-ins_CTTCACT	6	255	FALSE	FALSE
24_v.txt	33238	33238-Insertion---T	Insertion	1	-	T	40	24839	0.161037	38.975	msh3	FALSE	CAN	JSY15	1	msh3-Rep1	CCT	nope	A/T+1	>1bpdel	none	A/T+1	CTTCTCCTTCATC	CTTCATC	GGA	CCT	-	A	NA	NA_CCT	A/T+1_CTTCATC	6	229	FALSE	FALSE
24_v.txt	33318	33318-Insertion---TACAATTCTT	Insertion	10	-	TACAATTCTT	9	24839	0.0362333	62.6556	msh3	FALSE	CAN	JSY15	1	msh3-Rep1	ATA	nope	>1bp-ins	>1bpdel	none	>1bp-ins	AATGGATACAATT	TACAATT	TAT	ATA	-	none	NA	NA_ATA	>1bp-ins_TACAATT	6	149	FALSE	FALSE
24_v.txt	33341	33341-Insertion---T	Insertion	1	-	T	19	24839	0.0764926	62.5789	msh3	FALSE	CAN	JSY15	1	msh3-Rep1	CTT	nope	A/T+1	>1bpdel	none	A/T+1	CTCATCTTTCAAT	TTTCAAT	GAA	CTT	-	A	NA	NA_CTT	A/T+1_TTTCAAT	6	126	FALSE	FALSE
24_v.txt	33356	33356-Insertion---C	Insertion	1	-	C	4	24839	0.0161037	63	msh3	FALSE	CAN	JSY15	1	msh3-Rep1	ACC	nope	G/C+1	>1bpdel	none	G/C+1	TATTGACCCACGT	CCCACGT	TGG	ACC	-	G	NA	NA_ACC	G/C+1_CCCACGT	6	111	FALSE	FALSE
24_v.txt	33361	33361-Insertion---GTCTGTGGTGT	Insertion	11	-	GTCTGTGGTGT	3	24839	0.0120778	54.9394	msh3	FALSE	CAN	JSY15	1	msh3-Rep1	CGT	nope	>1bp-ins	>1bpdel	none	>1bp-ins	ACCCACGTCTGTG	GTCTGTG	GCA	CGT	-	none	NA	NA_CGT	>1bp-ins_GTCTGTG	6	106	FALSE	FALSE
24_v.txt	33361	33361-Insertion---GTCTGTTGTGT	Insertion	11	-	GTCTGTTGTGT	1	24839	0.004026	31.8182	msh3	FALSE	CAN	JSY15	1	msh3-Rep1	CGT	nope	>1bp-ins	>1bpdel	none	>1bp-ins	ACCCACGTCTGTG	GTCTGTG	GCA	CGT	-	none	NA	NA_CGT	>1bp-ins_GTCTGTG	6	106	FALSE	FALSE
24_v.txt	33403	33403-Insertion---T	Insertion	1	-	T	10	24835	0.0402658	53.4	msh3	FALSE	CAN	JSY15	1	msh3-Rep1	GTT	nope	A/T+1	>1bpdel	none	A/T+1	AGAGGGTTGTGAC	TTGTGAC	CAA	GTT	-	A	NA	NA_GTT	A/T+1_TTGTGAC	6	64	FALSE	FALSE
24_v.txt	31810	31810-Deletion-TAAATCTGCATC--	Deletion	12	TAAATCTGCATC	-	20	14060	0.142248	57.15	msh3	FALSE	CAN	JSY15	1	msh3-Rep1	ATA	nope	>1bp-ins	>1bpdel	none	>1bpdel	TCCAAATAAATCT	TAAATCT	TAT	ATA	TAAATCTGCATC	none	NA	NA_ATA	>1bpdel_TAAATCT	6	1657	FALSE	FALSE
24_v.txt	31812	31812-Deletion-AATCTGCATCTG--	Deletion	12	AATCTGCATCTG	-	13	14060	0.0924609	52.1538	msh3	FALSE	CAN	JSY15	1	msh3-Rep1	AAA	nope	>1bp-ins	>1bpdel	none	>1bpdel	CAAATAAATCTGC	AATCTGC	TTT	AAA	AATCTGCATCTG	none	NA	NA_AAA	>1bpdel_AATCTGC	6	1655	FALSE	FALSE
24_v.txt	31813	31813-Deletion-ATCTGC--	Deletion	6	ATCTGC	-	39	14060	0.277383	56.3846	msh3	FALSE	CAN	JSY15	1	msh3-Rep1	AAT	nope	>1bp-ins	>1bpdel	none	>1bpdel	AAATAAATCTGCA	ATCTGCA	TTA	AAT	ATCTGC	none	NA	NA_AAT	>1bpdel_ATCTGCA	6	1654	FALSE	FALSE
24_v.txt	31913	31913-Deletion-AA--	Deletion	2	AA	-	18	13964	0.128903	37.8889	msh3	FALSE	CAN	JSY15	1	msh3-Rep1	CAA	nope	>1bp-ins	>1bpdel	none	>1bpdel	TGGTGCAAAAGCC	AAAAGCC	GTT	CAA	AA	none	NA	NA_CAA	>1bpdel_AAAAGCC	6	1554	FALSE	FALSE
24_v.txt	32014	32014-Deletion-GA--	Deletion	2	GA	-	43	30746	0.139856	54.7674	msh3	FALSE	CAN	JSY15	1	msh3-Rep1	CGA	nope	>1bp-ins	>1bpdel	none	>1bpdel	CGTCACGAGAGAT	GAGAGAT	GCT	CGA	GA	none	NA	NA_CGA	>1bpdel_GAGAGAT	6	1453	FALSE	FALSE
24_v.txt	32064	32064-Deletion-GA--	Deletion	2	GA	-	12	30788	0.0389762	63.75	msh3	FALSE	CAN	JSY15	1	msh3-Rep1	TGA	nope	>1bp-ins	>1bpdel	none	>1bpdel	GAGATTGAGATAA	GAGATAA	ACT	TGA	GA	none	NA	NA_TGA	>1bpdel_GAGATAA	6	1403	FALSE	FALSE
24_v.txt	32067	32067-Deletion-ATAA--	Deletion	4	ATAA	-	37	30788	0.120177	63.1351	msh3	FALSE	CAN	JSY15	1	msh3-Rep1	GAT	nope	>1bp-ins	>1bpdel	none	>1bpdel	ATTGAGATAAATA	ATAAATA	CTA	GAT	ATAA	none	NA	NA_GAT	>1bpdel_ATAAATA	6	1400	FALSE	FALSE
24_v.txt	32094	32094-Deletion-AC--	Deletion	2	AC	-	49	30788	0.159153	60.6327	msh3	FALSE	CAN	JSY15	1	msh3-Rep1	AAC	nope	>1bp-ins	>1bpdel	none	>1bpdel	CCTGCAACACCAG	ACACCAG	TTG	AAC	AC	none	NA	NA_AAC	>1bpdel_ACACCAG	6	1373	FALSE	FALSE
24_v.txt	32295	32295-Deletion-TT--	Deletion	2	TT	-	30	36279	0.0826925	54.2667	msh3	FALSE	CAN	JSY15	1	msh3-Rep1	ATT	nope	>1bp-ins	>1bpdel	none	>1bpdel	TTTGAATTTGCGG	TTTGCGG	TAA	ATT	TT	none	NA	NA_ATT	>1bpdel_TTTGCGG	6	1172	FALSE	FALSE
24_v.txt	32313	32313-Deletion-GTT--	Deletion	3	GTT	-	196	36279	0.540257	59.9388	msh3	FALSE	CAN	JSY15	1	msh3-Rep1	GGT	nope	>1bp-ins	>1bpdel	none	>1bpdel	ATAATGGTTGTTA	GTTGTTA	CCA	GGT	GTT	none	NA	NA_GGT	>1bpdel_GTTGTTA	6	1154	FALSE	FALSE
24_v.txt	32337	32337-Deletion-AT--	Deletion	2	AT	-	563	36279	1.55186	61.9698	msh3	FALSE	CAN	JSY15	1	msh3-Rep1	GAT	nope	>1bp-ins	>1bpdel	none	>1bpdel	TTGAAGATATGTG	ATATGTG	CTA	GAT	AT	none	NA	NA_GAT	>1bpdel_ATATGTG	6	1130	FALSE	FALSE
24_v.txt	32352	32352-Deletion-TT--	Deletion	2	TT	-	2	36279	0.005513	64	msh3	FALSE	CAN	JSY15	1	msh3-Rep1	CTT	nope	>1bp-ins	>1bpdel	none	>1bpdel	AAAACCTTTGTAC	TTTGTAC	GAA	CTT	TT	none	NA	NA_CTT	>1bpdel_TTTGTAC	6	1115	FALSE	FALSE
24_v.txt	32360	32360-Deletion-AG--	Deletion	2	AG	-	54	36279	0.148846	60.6667	msh3	FALSE	CAN	JSY15	1	msh3-Rep1	CAG	nope	>1bp-ins	>1bpdel	none	>1bpdel	TGTACCAGAGTTC	AGAGTTC	GTC	CAG	AG	none	NA	NA_CAG	>1bpdel_AGAGTTC	6	1107	FALSE	FALSE
24_v.txt	32375	32375-Deletion-AAT--	Deletion	3	AAT	-	40	36279	0.110257	63.025	msh3	FALSE	CAN	JSY15	1	msh3-Rep1	CAA	nope	>1bp-ins	>1bpdel	none	>1bpdel	AATAGCAATAATA	AATAATA	GTT	CAA	AAT	none	NA	NA_CAA	>1bpdel_AATAATA	6	1092	FALSE	FALSE
24_v.txt	32442	32442-Deletion-AA--	Deletion	2	AA	-	18	36279	0.0496155	56.1667	msh3	FALSE	CAN	JSY15	1	msh3-Rep1	TAA	nope	>1bp-ins	>1bpdel	none	>1bpdel	GGAACTAAAAGTC	AAAAGTC	ATT	TAA	AA	none	NA	NA_TAA	>1bpdel_AAAAGTC	6	1025	FALSE	FALSE
24_v.txt	32454	32454-Deletion-AAT--	Deletion	3	AAT	-	44	36279	0.121282	52.6818	msh3	FALSE	CAN	JSY15	1	msh3-Rep1	GAA	nope	>1bp-ins	>1bpdel	none	>1bpdel	CCAATGAATAATA	AATAATA	CTT	GAA	AAT	none	NA	NA_GAA	>1bpdel_AATAATA	6	1013	FALSE	FALSE
24_v.txt	32460	32460-Deletion-AG--	Deletion	2	AG	-	202	36279	0.556796	50.599	msh3	FALSE	CAN	JSY15	1	msh3-Rep1	TAG	nope	>1bp-ins	>1bpdel	none	>1bpdel	AATAATAGAGAGC	AGAGAGC	ATC	TAG	AG	none	NA	NA_TAG	>1bpdel_AGAGAGC	6	1007	FALSE	FALSE
24_v.txt	32473	32473-Deletion-AG--	Deletion	2	AG	-	1	36279	0.002756	64	msh3	FALSE	CAN	JSY15	1	msh3-Rep1	TAG	nope	>1bp-ins	>1bpdel	none	>1bpdel	CAATGTAGAAGGT	AGAAGGT	ATC	TAG	AG	none	NA	NA_TAG	>1bpdel_AGAAGGT	6	994	FALSE	FALSE
24_v.txt	32473	32473-Deletion-AGA--	Deletion	3	AGA	-	31	36279	0.0854489	51.3871	msh3	FALSE	CAN	JSY15	1	msh3-Rep1	TAG	nope	>1bp-ins	>1bpdel	none	>1bpdel	CAATGTAGAAGGT	AGAAGGT	ATC	TAG	AGA	none	NA	NA_TAG	>1bpdel_AGAAGGT	6	994	FALSE	FALSE
24_v.txt	32492	32492-Deletion-AAC--	Deletion	3	AAC	-	48	36279	0.132308	42.6667	msh3	FALSE	CAN	JSY15	1	msh3-Rep1	AAA	nope	>1bp-ins	>1bpdel	none	>1bpdel	ACGGAAAACAACT	AACAACT	TTT	AAA	AAC	none	NA	NA_AAA	>1bpdel_AACAACT	6	975	FALSE	FALSE
24_v.txt	32498	32498-Deletion-TT--	Deletion	2	TT	-	128	36279	0.352821	42.7812	msh3	FALSE	CAN	JSY15	1	msh3-Rep1	CTT	nope	>1bp-ins	>1bpdel	none	>1bpdel	AACAACTTTTTTG	TTTTTTG	GAA	CTT	TT	none	NA	NA_CTT	>1bpdel_TTTTTTG	6	969	FALSE	FALSE
24_v.txt	32542	32542-Deletion-CA--	Deletion	2	CA	-	1	36279	0.002756	38	msh3	FALSE	CAN	JSY15	1	msh3-Rep1	TCA	nope	>1bp-ins	>1bpdel	none	>1bpdel	CAGCTTCACCAGC	CACCAGC	AGT	TCA	CA	none	NA	NA_TCA	>1bpdel_CACCAGC	6	925	FALSE	FALSE
24_v.txt	32545	32545-Deletion-CAG--	Deletion	3	CAG	-	76	36279	0.209488	37.3816	msh3	FALSE	CAN	JSY15	1	msh3-Rep1	CCA	nope	>1bp-ins	>1bpdel	none	>1bpdel	CTTCACCAGCAGT	CAGCAGT	GGT	CCA	CAG	none	NA	NA_CCA	>1bpdel_CAGCAGT	6	922	FALSE	FALSE
24_v.txt	32584	32584-Deletion-AGGC--	Deletion	4	AGGC	-	8	31991	0.025007	37.875	msh3	FALSE	CAN	JSY15	1	msh3-Rep1	AAG	nope	>1bp-ins	>1bpdel	none	>1bpdel	ATGTGAAGGCAGC	AGGCAGC	TTC	AAG	AGGC	none	NA	NA_AAG	>1bpdel_AGGCAGC	6	883	FALSE	FALSE
24_v.txt	32603	32603-Deletion-GG--	Deletion	2	GG	-	15	31991	0.0468882	47.2	msh3	FALSE	CAN	JSY15	1	msh3-Rep1	AGG	nope	>1bp-ins	>1bpdel	none	>1bpdel	CAAAGAGGAAACC	GGAAACC	TCC	AGG	GG	none	NA	NA_AGG	>1bpdel_GGAAACC	6	864	FALSE	FALSE
24_v.txt	32736	32736-Deletion-TA--	Deletion	2	TA	-	78	32052	0.243355	57.5769	msh3	FALSE	CAN	JSY15	1	msh3-Rep1	GTA	nope	>1bp-ins	>1bpdel	none	>1bpdel	AAACAGTATATTA	TATATTA	CAT	GTA	TA	none	NA	NA_GTA	>1bpdel_TATATTA	6	731	FALSE	FALSE
24_v.txt	32760	32760-Deletion-AA--	Deletion	2	AA	-	11	32052	0.0343192	55.6364	msh3	FALSE	CAN	JSY15	1	msh3-Rep1	TAA	nope	>1bp-ins	>1bpdel	none	>1bpdel	ATGGCTAAAACTT	AAAACTT	ATT	TAA	AA	none	NA	NA_TAA	>1bpdel_AAAACTT	6	707	FALSE	FALSE
24_v.txt	32767	32767-Deletion-TGA--	Deletion	3	TGA	-	14	32052	0.043679	52.5714	msh3	FALSE	CAN	JSY15	1	msh3-Rep1	TTG	nope	>1bp-ins	>1bpdel	none	>1bpdel	AAACTTTGATGGA	TGATGGA	AAC	TTG	TGA	none	NA	NA_TTG	>1bpdel_TGATGGA	6	700	FALSE	FALSE
24_v.txt	32935	32935-Deletion-CC--	Deletion	2	CC	-	1	29073	0.00344	64	msh3	FALSE	CAN	JSY15	1	msh3-Rep1	GCC	nope	>1bp-ins	>1bpdel	none	>1bpdel	TGATTGCCCAAGA	CCCAAGA	CGG	GCC	CC	none	NA	NA_GCC	>1bpdel_CCCAAGA	6	532	FALSE	FALSE
24_v.txt	32994	32994-Deletion-TG--	Deletion	2	TG	-	55	29073	0.189179	62.5273	msh3	FALSE	CAN	JSY15	1	msh3-Rep1	TTG	nope	>1bp-ins	>1bpdel	none	>1bpdel	AATCTTTGTGAGA	TGTGAGA	AAC	TTG	TG	none	NA	NA_TTG	>1bpdel_TGTGAGA	6	473	FALSE	FALSE
24_v.txt	33005	33005-Deletion-TG--	Deletion	2	TG	-	30	29074	0.103185	62.8667	msh3	FALSE	CAN	JSY15	1	msh3-Rep1	CTG	nope	>1bp-ins	>1bpdel	none	>1bpdel	GAAAACTGTGAAA	TGTGAAA	GAC	CTG	TG	none	NA	NA_CTG	>1bpdel_TGTGAAA	6	462	FALSE	FALSE
24_v.txt	33065	33065-Deletion-AT--	Deletion	2	AT	-	165	29074	0.567517	56.8	msh3	FALSE	CAN	JSY15	1	msh3-Rep1	AAT	nope	>1bp-ins	>1bpdel	none	>1bpdel	GACAGAATATGCC	ATATGCC	TTA	AAT	AT	none	NA	NA_AAT	>1bpdel_ATATGCC	6	402	FALSE	FALSE
24_v.txt	33072	33072-Deletion-AAAG--	Deletion	4	AAAG	-	35	29074	0.120382	50.8571	msh3	FALSE	CAN	JSY15	1	msh3-Rep1	CAA	nope	>1bp-ins	>1bpdel	none	>1bpdel	TATGCCAAAGAAC	AAAGAAC	GTT	CAA	AAAG	none	NA	NA_CAA	>1bpdel_AAAGAAC	6	395	FALSE	FALSE
24_v.txt	33081	33081-Deletion-ATAA--	Deletion	4	ATAA	-	334	29074	1.14879	52.7305	msh3	FALSE	CAN	JSY15	1	msh3-Rep1	CAT	nope	>1bp-ins	>1bpdel	none	>1bpdel	GAACCCATAAATA	ATAAATA	GTA	CAT	ATAA	none	NA	NA_CAT	>1bpdel_ATAAATA	6	386	FALSE	FALSE
24_v.txt	33089	33089-Deletion-AT--	Deletion	2	AT	-	236	29074	0.811722	51.8856	msh3	FALSE	CAN	JSY15	1	msh3-Rep1	AAT	nope	>1bp-ins	>1bpdel	none	>1bpdel	AAATAAATATGAT	ATATGAT	TTA	AAT	AT	none	NA	NA_AAT	>1bpdel_ATATGAT	6	378	FALSE	FALSE
24_v.txt	33089	33089-Deletion-ATATG--	Deletion	5	ATATG	-	51	29074	0.175414	53.549	msh3	FALSE	CAN	JSY15	1	msh3-Rep1	AAT	nope	>1bp-ins	>1bpdel	none	>1bpdel	AAATAAATATGAT	ATATGAT	TTA	AAT	ATATG	none	NA	NA_AAT	>1bpdel_ATATGAT	6	378	FALSE	FALSE
24_v.txt	33094	33094-Deletion-AT--	Deletion	2	AT	-	145	29074	0.498727	50.8966	msh3	FALSE	CAN	JSY15	1	msh3-Rep1	GAT	nope	>1bp-ins	>1bpdel	none	>1bpdel	AATATGATATAAG	ATATAAG	CTA	GAT	AT	none	NA	NA_GAT	>1bpdel_ATATAAG	6	373	FALSE	FALSE
24_v.txt	33126	33126-Deletion-AG--	Deletion	2	AG	-	22	29074	0.075669	42.4545	msh3	FALSE	CAN	JSY15	1	msh3-Rep1	CAG	nope	>1bp-ins	>1bpdel	none	>1bpdel	TTGGTCAGAGGTG	AGAGGTG	GTC	CAG	AG	none	NA	NA_CAG	>1bpdel_AGAGGTG	6	341	FALSE	FALSE
24_v.txt	33167	33167-Deletion-ACC--	Deletion	3	ACC	-	43	29022	0.148163	37.8372	msh3	FALSE	CAN	JSY15	1	msh3-Rep1	TAC	nope	>1bp-ins	>1bpdel	none	>1bpdel	AATAGTACCACCA	ACCACCA	ATG	TAC	ACC	none	NA	NA_TAC	>1bpdel_ACCACCA	6	300	FALSE	FALSE
24_v.txt	33189	33189-Deletion-AT--	Deletion	2	AT	-	134	24780	0.540759	37.3657	msh3	FALSE	CAN	JSY15	1	msh3-Rep1	AAT	nope	>1bp-ins	>1bpdel	none	>1bpdel	ATACCAATATGTC	ATATGTC	TTA	AAT	AT	none	NA	NA_AAT	>1bpdel_ATATGTC	6	278	FALSE	FALSE
24_v.txt	33206	33206-Deletion-CT--	Deletion	2	CT	-	828	24799	3.33884	38.9662	msh3	FALSE	CAN	JSY15	1	msh3-Rep1	GCT	nope	>1bp-ins	>1bpdel	none	>1bpdel	CTTAAGCTCTCTC	CTCTCTC	CGA	GCT	CT	none	NA	NA_GCT	>1bpdel_CTCTCTC	6	261	FALSE	FALSE
24_v.txt	33254	33254-Deletion-TA--	Deletion	2	TA	-	53	24839	0.213374	44.2642	msh3	FALSE	CAN	JSY15	1	msh3-Rep1	CTA	nope	>1bp-ins	>1bpdel	none	>1bpdel	ATCACCTATGCCA	TATGCCA	GAT	CTA	TA	none	NA	NA_CTA	>1bpdel_TATGCCA	6	213	FALSE	FALSE
24_v.txt	33423	33423-Deletion-AT--	Deletion	2	AT	-	37	24835	0.148983	44.7027	msh3	FALSE	CAN	JSY15	1	msh3-Rep1	CAT	nope	>1bp-ins	>1bpdel	none	>1bpdel	TTGTACATATGCT	ATATGCT	GTA	CAT	AT	none	NA	NA_CAT	>1bpdel_ATATGCT	6	44	FALSE	FALSE
24_v.txt	31663	31663-Deletion-A--	Deletion	1	A	-	9	14060	0.0640114	36.3333	msh3	FALSE	CAN	JSY15	1	msh3-Rep1	GAA	nope	>1bp-ins	A/T-1	none	A/T-1	GCGTGGAAATGTG	AAATGTG	CTT	CTT	T	none	T>none	T>none_CTT	A/T-1_AAATGTG	6	1804	FALSE	FALSE
24_v.txt	31723	31723-Deletion-A--	Deletion	1	A	-	14	14060	0.0995733	62.5	msh3	FALSE	CAN	JSY15	1	msh3-Rep1	CAA	nope	>1bp-ins	A/T-1	none	A/T-1	TGTCCCAAAAAGT	AAAAAGT	GTT	GTT	T	none	T>none	T>none_GTT	A/T-1_AAAAAGT	6	1744	FALSE	FALSE
24_v.txt	31863	31863-Deletion-A--	Deletion	1	A	-	84	14060	0.59744	48.4286	msh3	FALSE	CAN	JSY15	1	msh3-Rep1	GAA	nope	>1bp-ins	A/T-1	none	A/T-1	AACAGGAAAATAG	AAAATAG	CTT	CTT	T	none	T>none	T>none_CTT	A/T-1_AAAATAG	6	1604	FALSE	FALSE
24_v.txt	31896	31896-Deletion-C--	Deletion	1	C	-	11	13964	0.078774	48.3636	msh3	FALSE	CAN	JSY15	1	msh3-Rep1	ACC	nope	>1bp-ins	G/C-1	none	G/C-1	CTAACACCATTGA	CCATTGA	TGG	ACC	C	none	nope	nope_ACC	G/C-1_CCATTGA	6	1571	FALSE	FALSE
24_v.txt	31904	31904-Deletion-T--	Deletion	1	T	-	25	13964	0.179032	45.28	msh3	FALSE	CAN	JSY15	1	msh3-Rep1	ATT	nope	>1bp-ins	A/T-1	none	A/T-1	ATTGAATTTTGGT	TTTTGGT	TAA	ATT	T	none	nope	nope_ATT	A/T-1_TTTTGGT	6	1563	FALSE	FALSE
24_v.txt	31913	31913-Deletion-A--	Deletion	1	A	-	5	13964	0.0358064	42.8	msh3	FALSE	CAN	JSY15	1	msh3-Rep1	CAA	nope	>1bp-ins	A/T-1	none	A/T-1	TGGTGCAAAAGCC	AAAAGCC	GTT	GTT	T	none	T>none	T>none_GTT	A/T-1_AAAAGCC	6	1554	FALSE	FALSE
24_v.txt	31922	31922-Deletion-G--	Deletion	1	G	-	8	13964	0.0572902	37.875	msh3	FALSE	CAN	JSY15	1	msh3-Rep1	TGA	nope	>1bp-ins	G/C-1	none	G/C-1	AGCCGTGAAACCT	GAAACCT	ACT	ACT	C	none	C>none	C>none_ACT	G/C-1_GAAACCT	6	1545	FALSE	FALSE
24_v.txt	31923	31923-Deletion-A--	Deletion	1	A	-	7	13964	0.0501289	37.8571	msh3	FALSE	CAN	JSY15	1	msh3-Rep1	GAA	nope	>1bp-ins	A/T-1	none	A/T-1	GCCGTGAAACCTT	AAACCTT	CTT	CTT	T	none	T>none	T>none_CTT	A/T-1_AAACCTT	6	1544	FALSE	FALSE
24_v.txt	31958	31958-Deletion-G--	Deletion	1	G	-	61	30746	0.1984	36.6721	msh3	FALSE	CAN	JSY15	1	msh3-Rep1	TGG	nope	>1bp-ins	G/C-1	none	G/C-1	AAATGTGGCCGCA	GGCCGCA	ACC	ACC	C	none	C>none	C>none_ACC	G/C-1_GGCCGCA	6	1509	FALSE	FALSE
24_v.txt	31962	31962-Deletion-G--	Deletion	1	G	-	43	30746	0.139856	37.186	msh3	FALSE	CAN	JSY15	1	msh3-Rep1	CGC	nope	>1bp-ins	G/C-1	none	G/C-1	GTGGCCGCATAAT	GCATAAT	GCG	GCG	C	none	C>none	C>none_GCG	G/C-1_GCATAAT	6	1505	FALSE	FALSE
24_v.txt	31972	31972-Deletion-C--	Deletion	1	C	-	9	30746	0.0292721	30.2222	msh3	FALSE	CAN	JSY15	1	msh3-Rep1	GCC	nope	>1bp-ins	G/C-1	none	G/C-1	AATAAGCCAAGCC	CCAAGCC	CGG	GCC	C	none	nope	nope_GCC	G/C-1_CCAAGCC	6	1495	FALSE	FALSE
24_v.txt	31979	31979-Deletion-G--	Deletion	1	G	-	1450	30746	4.71606	41.6834	msh3	FALSE	CAN	JSY15	1	msh3-Rep1	CGG	nope	>1bp-ins	G/C-1	none	G/C-1	CAAGCCGGGCATT	GGGCATT	GCC	GCC	C	none	C>none	C>none_GCC	G/C-1_GGGCATT	6	1488	FALSE	FALSE
24_v.txt	31993	31993-Deletion-C--	Deletion	1	C	-	94	30746	0.305731	52.7021	msh3	FALSE	CAN	JSY15	1	msh3-Rep1	GCT	nope	>1bp-ins	G/C-1	none	G/C-1	ATTTAGCTTTAAA	CTTTAAA	CGA	GCT	C	none	nope	nope_GCT	G/C-1_CTTTAAA	6	1474	FALSE	FALSE
24_v.txt	31997	31997-Deletion-A--	Deletion	1	A	-	13	30746	0.0422819	55.7692	msh3	FALSE	CAN	JSY15	1	msh3-Rep1	TAA	nope	>1bp-ins	A/T-1	none	A/T-1	AGCTTTAAATGGT	AAATGGT	ATT	ATT	T	none	T>none	T>none_ATT	A/T-1_AAATGGT	6	1470	FALSE	FALSE
24_v.txt	32007	32007-Deletion-T--	Deletion	1	T	-	18	30746	0.0585442	55.1111	msh3	FALSE	CAN	JSY15	1	msh3-Rep1	CTC	nope	>1bp-ins	A/T-1	none	A/T-1	GGTAACTCGTCAC	TCGTCAC	GAG	CTC	T	none	nope	nope_CTC	A/T-1_TCGTCAC	6	1460	FALSE	FALSE
24_v.txt	32015	32015-Deletion-A--	Deletion	1	A	-	8	30746	0.0260196	57	msh3	FALSE	CAN	JSY15	1	msh3-Rep1	GAG	nope	>1bp-ins	A/T-1	none	A/T-1	GTCACGAGAGATG	AGAGATG	CTC	CTC	T	none	T>none	T>none_CTC	A/T-1_AGAGATG	6	1452	FALSE	FALSE
24_v.txt	32045	32045-Deletion-A--	Deletion	1	A	-	10	30788	0.0324802	63.1	msh3	FALSE	CAN	JSY15	1	msh3-Rep1	TAA	nope	>1bp-ins	A/T-1	none	A/T-1	TTGCATAAATCTG	AAATCTG	ATT	ATT	T	none	T>none	T>none_ATT	A/T-1_AAATCTG	6	1422	FALSE	FALSE
24_v.txt	32069	32069-Deletion-A--	Deletion	1	A	-	4	30786	0.0129929	63.5	msh3	FALSE	CAN	JSY15	1	msh3-Rep1	TAA	nope	>1bp-ins	A/T-1	none	A/T-1	TGAGATAAATAAC	AAATAAC	ATT	ATT	T	none	T>none	T>none_ATT	A/T-1_AAATAAC	6	1398	FALSE	FALSE
24_v.txt	32073	32073-Deletion-A--	Deletion	1	A	-	64	30788	0.207873	62.8438	msh3	FALSE	CAN	JSY15	1	msh3-Rep1	TAA	nope	>1bp-ins	A/T-1	none	A/T-1	ATAAATAACCATG	AACCATG	ATT	ATT	T	none	T>none	T>none_ATT	A/T-1_AACCATG	6	1394	FALSE	FALSE
24_v.txt	32079	32079-Deletion-G--	Deletion	1	G	-	1	30787	0.003248	49	msh3	FALSE	CAN	JSY15	1	msh3-Rep1	TGC	nope	>1bp-ins	G/C-1	none	G/C-1	AACCATGCAAAAA	GCAAAAA	ACG	ACG	C	none	C>none	C>none_ACG	G/C-1_GCAAAAA	6	1388	FALSE	FALSE
24_v.txt	32080	32080-Deletion-C--	Deletion	1	C	-	10	30788	0.0324802	64	msh3	FALSE	CAN	JSY15	1	msh3-Rep1	GCA	nope	>1bp-ins	G/C-1	none	G/C-1	ACCATGCAAAAAA	CAAAAAA	CGT	GCA	C	none	nope	nope_GCA	G/C-1_CAAAAAA	6	1387	FALSE	FALSE
24_v.txt	32081	32081-Deletion-A--	Deletion	1	A	-	1636	30788	5.31376	62.7793	msh3	FALSE	CAN	JSY15	1	msh3-Rep1	CAA	nope	>1bp-ins	A/T-1	none	A/T-1	CCATGCAAAAAAG	AAAAAAG	GTT	GTT	T	none	T>none	T>none_GTT	A/T-1_AAAAAAG	6	1386	FALSE	FALSE
24_v.txt	32087	32087-Deletion-G--	Deletion	1	G	-	12	30788	0.0389762	63.6667	msh3	FALSE	CAN	JSY15	1	msh3-Rep1	AGC	nope	>1bp-ins	G/C-1	none	G/C-1	AAAAAAGCCTGCA	GCCTGCA	TCG	TCG	C	none	C>none	C>none_TCG	G/C-1_GCCTGCA	6	1380	FALSE	FALSE
24_v.txt	32125	32125-Deletion-C--	Deletion	1	C	-	23	30788	0.0747044	54.0435	msh3	FALSE	CAN	JSY15	1	msh3-Rep1	ACT	nope	>1bp-ins	G/C-1	none	G/C-1	CGAAAACTTTGTC	CTTTGTC	TGA	ACT	C	none	nope	nope_ACT	G/C-1_CTTTGTC	6	1342	FALSE	FALSE
24_v.txt	32130	32130-Deletion-T--	Deletion	1	T	-	22	30788	0.0714564	55.1364	msh3	FALSE	CAN	JSY15	1	msh3-Rep1	GTC	nope	>1bp-ins	A/T-1	none	A/T-1	ACTTTGTCACCAC	TCACCAC	CAG	GTC	T	none	nope	nope_GTC	A/T-1_TCACCAC	6	1337	FALSE	FALSE
24_v.txt	32139	32139-Deletion-G--	Deletion	1	G	-	24	30788	0.0779524	55	msh3	FALSE	CAN	JSY15	1	msh3-Rep1	AGT	nope	>1bp-ins	G/C-1	none	G/C-1	CCACCAGTAGATG	GTAGATG	TCA	TCA	C	none	C>none	C>none_TCA	G/C-1_GTAGATG	6	1328	FALSE	FALSE
24_v.txt	32149	32149-Deletion-C--	Deletion	1	C	-	10	30788	0.0324802	50.4	msh3	FALSE	CAN	JSY15	1	msh3-Rep1	TCC	nope	>1bp-ins	G/C-1	none	G/C-1	ATGTCTCCATGTA	CCATGTA	AGG	TCC	C	none	nope	nope_TCC	G/C-1_CCATGTA	6	1318	FALSE	FALSE
24_v.txt	32160	32160-Deletion-A--	Deletion	1	A	-	7	30788	0.0227361	50.8571	msh3	FALSE	CAN	JSY15	1	msh3-Rep1	CAA	nope	>1bp-ins	A/T-1	none	A/T-1	TAAGCCAAAGCGC	AAAGCGC	GTT	GTT	T	none	T>none	T>none_GTT	A/T-1_AAAGCGC	6	1307	FALSE	FALSE
24_v.txt	32184	32184-Deletion-A--	Deletion	1	A	-	32	30788	0.103937	45.875	msh3	FALSE	CAN	JSY15	1	msh3-Rep1	GAA	nope	>1bp-ins	A/T-1	none	A/T-1	GTAACGAAAACTG	AAAACTG	CTT	CTT	T	none	T>none	T>none_CTT	A/T-1_AAAACTG	6	1283	FALSE	FALSE
24_v.txt	32205	32205-Deletion-C--	Deletion	1	C	-	5	30788	0.0162401	37.8	msh3	FALSE	CAN	JSY15	1	msh3-Rep1	ACC	nope	>1bp-ins	G/C-1	none	G/C-1	GGAACACCACCTT	CCACCTT	TGG	ACC	C	none	nope	nope_ACC	G/C-1_CCACCTT	6	1262	FALSE	FALSE
24_v.txt	32210	32210-Deletion-T--	Deletion	1	T	-	12	30788	0.0389762	42.1667	msh3	FALSE	CAN	JSY15	1	msh3-Rep1	CTT	nope	>1bp-ins	A/T-1	none	A/T-1	ACCACCTTTGGTG	TTTGGTG	GAA	CTT	T	none	nope	nope_CTT	A/T-1_TTTGGTG	6	1257	FALSE	FALSE
24_v.txt	32223	32223-Deletion-G--	Deletion	1	G	-	27	30788	0.0876965	37.8889	msh3	FALSE	CAN	JSY15	1	msh3-Rep1	TGA	nope	>1bp-ins	G/C-1	none	G/C-1	GTCCTTGACAGGA	GACAGGA	ACT	ACT	C	none	C>none	C>none_ACT	G/C-1_GACAGGA	6	1244	FALSE	FALSE
24_v.txt	32235	32235-Deletion-G--	Deletion	1	G	-	21	30785	0.068215	37.7143	msh3	FALSE	CAN	JSY15	1	msh3-Rep1	AGG	nope	>1bp-ins	G/C-1	none	G/C-1	AATTTAGGAGCCA	GGAGCCA	TCC	TCC	C	none	C>none	C>none_TCC	G/C-1_GGAGCCA	6	1232	FALSE	FALSE
24_v.txt	32259	32259-Deletion-C--	Deletion	1	C	-	21	35826	0.0586166	35.5714	msh3	FALSE	CAN	JSY15	1	msh3-Rep1	ACC	nope	>1bp-ins	G/C-1	none	G/C-1	GATAGACCAAATA	CCAAATA	TGG	ACC	C	none	nope	nope_ACC	G/C-1_CCAAATA	6	1208	FALSE	FALSE
24_v.txt	32271	32271-Deletion-C--	Deletion	1	C	-	32	36281	0.0882004	36.3438	msh3	FALSE	CAN	JSY15	1	msh3-Rep1	ACG	nope	>1bp-ins	G/C-1	none	G/C-1	AAAATACGGGAAC	CGGGAAC	TGC	ACG	C	none	nope	nope_ACG	G/C-1_CGGGAAC	6	1196	FALSE	FALSE
24_v.txt	32272	32272-Deletion-G--	Deletion	1	G	-	65	36281	0.179157	37.2923	msh3	FALSE	CAN	JSY15	1	msh3-Rep1	CGG	nope	>1bp-ins	G/C-1	none	G/C-1	AAATACGGGAACC	GGGAACC	GCC	GCC	C	none	C>none	C>none_GCC	G/C-1_GGGAACC	6	1195	FALSE	FALSE
24_v.txt	32304	32304-Deletion-G--	Deletion	1	G	-	10	36279	0.0275642	62.8	msh3	FALSE	CAN	JSY15	1	msh3-Rep1	AGA	nope	>1bp-ins	G/C-1	none	G/C-1	GCGGCAGAAATAA	GAAATAA	TCT	TCT	C	none	C>none	C>none_TCT	G/C-1_GAAATAA	6	1163	FALSE	FALSE
24_v.txt	32346	32346-Deletion-A--	Deletion	1	A	-	49	36279	0.135064	62.2245	msh3	FALSE	CAN	JSY15	1	msh3-Rep1	CAA	nope	>1bp-ins	A/T-1	none	A/T-1	TGTGGCAAAACCT	AAAACCT	GTT	GTT	T	none	T>none	T>none_GTT	A/T-1_AAAACCT	6	1121	FALSE	FALSE
24_v.txt	32352	32352-Deletion-T--	Deletion	1	T	-	25	36277	0.0689142	63.84	msh3	FALSE	CAN	JSY15	1	msh3-Rep1	CTT	nope	>1bp-ins	A/T-1	none	A/T-1	AAAACCTTTGTAC	TTTGTAC	GAA	CTT	T	none	nope	nope_CTT	A/T-1_TTTGTAC	6	1115	FALSE	FALSE
24_v.txt	32363	32363-Deletion-G--	Deletion	1	G	-	24	36279	0.066154	63.2917	msh3	FALSE	CAN	JSY15	1	msh3-Rep1	AGT	nope	>1bp-ins	G/C-1	none	G/C-1	ACCAGAGTTCTCA	GTTCTCA	TCA	TCA	C	none	C>none	C>none_TCA	G/C-1_GTTCTCA	6	1104	FALSE	FALSE
24_v.txt	32384	32384-Deletion-G--	Deletion	1	G	-	29	36279	0.0799361	61.5517	msh3	FALSE	CAN	JSY15	1	msh3-Rep1	AGG	nope	>1bp-ins	G/C-1	none	G/C-1	AATAAAGGGAGAA	GGGAGAA	TCC	TCC	C	none	C>none	C>none_TCC	G/C-1_GGGAGAA	6	1083	FALSE	FALSE
24_v.txt	32410	32410-Deletion-A--	Deletion	1	A	-	49	36279	0.135064	54.6531	msh3	FALSE	CAN	JSY15	1	msh3-Rep1	GAT	nope	>1bp-ins	A/T-1	none	A/T-1	AAGTAGATTGTGT	ATTGTGT	CTA	CTA	T	none	T>none	T>none_CTA	A/T-1_ATTGTGT	6	1057	FALSE	FALSE
24_v.txt	32420	32420-Deletion-T--	Deletion	1	T	-	54	36279	0.148846	54.963	msh3	FALSE	CAN	JSY15	1	msh3-Rep1	GTT	nope	>1bp-ins	A/T-1	none	A/T-1	TGTTAGTTTAGGG	TTTAGGG	CAA	GTT	T	none	nope	nope_GTT	A/T-1_TTTAGGG	6	1047	FALSE	FALSE
24_v.txt	32424	32424-Deletion-G--	Deletion	1	G	-	160	36279	0.441026	56.875	msh3	FALSE	CAN	JSY15	1	msh3-Rep1	AGG	nope	>1bp-ins	G/C-1	none	G/C-1	AGTTTAGGGTCAT	GGGTCAT	TCC	TCC	C	none	C>none	C>none_TCC	G/C-1_GGGTCAT	6	1043	FALSE	FALSE
24_v.txt	32442	32442-Deletion-A--	Deletion	1	A	-	10	36279	0.0275642	50.8	msh3	FALSE	CAN	JSY15	1	msh3-Rep1	TAA	nope	>1bp-ins	A/T-1	none	A/T-1	GGAACTAAAAGTC	AAAAGTC	ATT	ATT	T	none	T>none	T>none_ATT	A/T-1_AAAAGTC	6	1025	FALSE	FALSE
24_v.txt	32459	32459-Deletion-T--	Deletion	1	T	-	8	36279	0.0220513	49.75	msh3	FALSE	CAN	JSY15	1	msh3-Rep1	ATA	nope	>1bp-ins	A/T-1	none	A/T-1	GAATAATAGAGAG	TAGAGAG	TAT	ATA	T	none	nope	nope_ATA	A/T-1_TAGAGAG	6	1008	FALSE	FALSE
24_v.txt	32463	32463-Deletion-G--	Deletion	1	G	-	19	36279	0.0523719	50.7368	msh3	FALSE	CAN	JSY15	1	msh3-Rep1	AGA	nope	>1bp-ins	G/C-1	none	G/C-1	AATAGAGAGCCAA	GAGCCAA	TCT	TCT	C	none	C>none	C>none_TCT	G/C-1_GAGCCAA	6	1004	FALSE	FALSE
24_v.txt	32475	32475-Deletion-A--	Deletion	1	A	-	3	36279	0.008269	53.3333	msh3	FALSE	CAN	JSY15	1	msh3-Rep1	GAA	nope	>1bp-ins	A/T-1	none	A/T-1	ATGTAGAAGGTTA	AAGGTTA	CTT	CTT	T	none	T>none	T>none_CTT	A/T-1_AAGGTTA	6	992	FALSE	FALSE
24_v.txt	32487	32487-Deletion-C--	Deletion	1	C	-	10	36279	0.0275642	52.2	msh3	FALSE	CAN	JSY15	1	msh3-Rep1	ACG	nope	>1bp-ins	G/C-1	none	G/C-1	AAGATACGGAAAA	CGGAAAA	TGC	ACG	C	none	nope	nope_ACG	G/C-1_CGGAAAA	6	980	FALSE	FALSE
24_v.txt	32490	32490-Deletion-A--	Deletion	1	A	-	37	36279	0.101987	42.4324	msh3	FALSE	CAN	JSY15	1	msh3-Rep1	GAA	nope	>1bp-ins	A/T-1	none	A/T-1	ATACGGAAAACAA	AAAACAA	CTT	CTT	T	none	T>none	T>none_CTT	A/T-1_AAAACAA	6	977	FALSE	FALSE
24_v.txt	32498	32498-Deletion-T--	Deletion	1	T	-	1299	36279	3.58058	44.9638	msh3	FALSE	CAN	JSY15	1	msh3-Rep1	CTT	nope	>1bp-ins	A/T-1	none	A/T-1	AACAACTTTTTTG	TTTTTTG	GAA	CTT	T	none	nope	nope_CTT	A/T-1_TTTTTTG	6	969	FALSE	FALSE
24_v.txt	32522	32522-Deletion-T--	Deletion	1	T	-	42	36279	0.115769	40.8095	msh3	FALSE	CAN	JSY15	1	msh3-Rep1	ATT	nope	>1bp-ins	A/T-1	none	A/T-1	AACGGATTTTCTG	TTTTCTG	TAA	ATT	T	none	nope	nope_ATT	A/T-1_TTTTCTG	6	945	FALSE	FALSE
24_v.txt	32528	32528-Deletion-G--	Deletion	1	G	-	153	36279	0.421732	41.4837	msh3	FALSE	CAN	JSY15	1	msh3-Rep1	TGG	nope	>1bp-ins	G/C-1	none	G/C-1	TTTTCTGGGGTTT	GGGGTTT	ACC	ACC	C	none	C>none	C>none_ACC	G/C-1_GGGGTTT	6	939	FALSE	FALSE
24_v.txt	32543	32543-Deletion-A--	Deletion	1	A	-	55	36279	0.151603	36.3636	msh3	FALSE	CAN	JSY15	1	msh3-Rep1	CAC	nope	>1bp-ins	A/T-1	none	A/T-1	AGCTTCACCAGCA	ACCAGCA	GTG	GTG	T	none	T>none	T>none_GTG	A/T-1_ACCAGCA	6	924	FALSE	FALSE
24_v.txt	32598	32598-Deletion-A--	Deletion	1	A	-	8	31991	0.025007	37.625	msh3	FALSE	CAN	JSY15	1	msh3-Rep1	CAA	nope	>1bp-ins	A/T-1	none	A/T-1	TTAATCAAAGAGG	AAAGAGG	GTT	GTT	T	none	T>none	T>none_GTT	A/T-1_AAAGAGG	6	869	FALSE	FALSE
24_v.txt	32608	32608-Deletion-C--	Deletion	1	C	-	245	31991	0.76584	46.4735	msh3	FALSE	CAN	JSY15	1	msh3-Rep1	ACC	nope	>1bp-ins	G/C-1	none	G/C-1	AGGAAACCCAACC	CCCAACC	TGG	ACC	C	none	nope	nope_ACC	G/C-1_CCCAACC	6	859	FALSE	FALSE
24_v.txt	32627	32627-Deletion-T--	Deletion	1	T	-	8	31991	0.025007	41.125	msh3	FALSE	CAN	JSY15	1	msh3-Rep1	CTT	nope	>1bp-ins	A/T-1	none	A/T-1	CCTCCCTTCGTTT	TTCGTTT	GAA	CTT	T	none	nope	nope_CTT	A/T-1_TTCGTTT	6	840	FALSE	FALSE
24_v.txt	32630	32630-Deletion-G--	Deletion	1	G	-	11	31991	0.0343847	55.0909	msh3	FALSE	CAN	JSY15	1	msh3-Rep1	CGT	nope	>1bp-ins	G/C-1	none	G/C-1	CCCTTCGTTTTTA	GTTTTTA	GCA	GCA	C	none	C>none	C>none_GCA	G/C-1_GTTTTTA	6	837	FALSE	FALSE
24_v.txt	32631	32631-Deletion-T--	Deletion	1	T	-	16	31991	0.0500141	50.5	msh3	FALSE	CAN	JSY15	1	msh3-Rep1	GTT	nope	>1bp-ins	A/T-1	none	A/T-1	CCTTCGTTTTTAT	TTTTTAT	CAA	GTT	T	none	nope	nope_GTT	A/T-1_TTTTTAT	6	836	FALSE	FALSE
24_v.txt	32658	32658-Deletion-C--	Deletion	1	C	-	408	32052	1.27293	60.6078	msh3	FALSE	CAN	JSY15	1	msh3-Rep1	ACC	nope	>1bp-ins	G/C-1	none	G/C-1	CCTGGACCCCAGG	CCCCAGG	TGG	ACC	C	none	nope	nope_ACC	G/C-1_CCCCAGG	6	809	FALSE	FALSE
24_v.txt	32663	32663-Deletion-G--	Deletion	1	G	-	9	32052	0.0280794	61.1111	msh3	FALSE	CAN	JSY15	1	msh3-Rep1	AGG	nope	>1bp-ins	G/C-1	none	G/C-1	ACCCCAGGCACCT	GGCACCT	TCC	TCC	C	none	C>none	C>none_TCC	G/C-1_GGCACCT	6	804	FALSE	FALSE
24_v.txt	32670	32670-Deletion-G--	Deletion	1	G	-	1505	32052	4.69549	60.9615	msh3	FALSE	CAN	JSY15	1	msh3-Rep1	TGG	nope	>1bp-ins	G/C-1	none	G/C-1	GCACCTGGGTTTC	GGGTTTC	ACC	ACC	C	none	C>none	C>none_ACC	G/C-1_GGGTTTC	6	797	FALSE	FALSE
24_v.txt	32697	32697-Deletion-G--	Deletion	1	G	-	78	32052	0.243355	61.5769	msh3	FALSE	CAN	JSY15	1	msh3-Rep1	TGG	nope	>1bp-ins	G/C-1	none	G/C-1	CCAACTGGGCCGG	GGGCCGG	ACC	ACC	C	none	C>none	C>none_ACC	G/C-1_GGGCCGG	6	770	FALSE	FALSE
24_v.txt	32702	32702-Deletion-G--	Deletion	1	G	-	57	32052	0.177836	63.1053	msh3	FALSE	CAN	JSY15	1	msh3-Rep1	CGG	nope	>1bp-ins	G/C-1	none	G/C-1	TGGGCCGGTAACC	GGTAACC	GCC	GCC	C	none	C>none	C>none_GCC	G/C-1_GGTAACC	6	765	FALSE	FALSE
24_v.txt	32707	32707-Deletion-C--	Deletion	1	C	-	289	32052	0.90166	61.5882	msh3	FALSE	CAN	JSY15	1	msh3-Rep1	ACC	nope	>1bp-ins	G/C-1	none	G/C-1	CGGTAACCCCAGC	CCCCAGC	TGG	ACC	C	none	nope	nope_ACC	G/C-1_CCCCAGC	6	760	FALSE	FALSE
24_v.txt	32719	32719-Deletion-A--	Deletion	1	A	-	17	32052	0.0530388	61.5294	msh3	FALSE	CAN	JSY15	1	msh3-Rep1	CAA	nope	>1bp-ins	A/T-1	none	A/T-1	CACCACAAACCAT	AAACCAT	GTT	GTT	T	none	T>none	T>none_GTT	A/T-1_AAACCAT	6	748	FALSE	FALSE
24_v.txt	32727	32727-Deletion-C--	Deletion	1	C	-	52	32052	0.162236	60.9038	msh3	FALSE	CAN	JSY15	1	msh3-Rep1	ACA	nope	>1bp-ins	G/C-1	none	G/C-1	ACCATACAAAAAC	CAAAAAC	TGT	ACA	C	none	nope	nope_ACA	G/C-1_CAAAAAC	6	740	FALSE	FALSE
24_v.txt	32728	32728-Deletion-A--	Deletion	1	A	-	226	32050	0.705148	60.6504	msh3	FALSE	CAN	JSY15	1	msh3-Rep1	CAA	nope	>1bp-ins	A/T-1	none	A/T-1	CCATACAAAAACA	AAAAACA	GTT	GTT	T	none	T>none	T>none_GTT	A/T-1_AAAAACA	6	739	FALSE	FALSE
24_v.txt	32747	32747-Deletion-C--	Deletion	1	C	-	47	32052	0.146637	54.5957	msh3	FALSE	CAN	JSY15	1	msh3-Rep1	ACC	nope	>1bp-ins	G/C-1	none	G/C-1	TAGAAACCCGATA	CCCGATA	TGG	ACC	C	none	nope	nope_ACC	G/C-1_CCCGATA	6	720	FALSE	FALSE
24_v.txt	32760	32760-Deletion-A--	Deletion	1	A	-	53	32052	0.165356	50.5849	msh3	FALSE	CAN	JSY15	1	msh3-Rep1	TAA	nope	>1bp-ins	A/T-1	none	A/T-1	ATGGCTAAAACTT	AAAACTT	ATT	ATT	T	none	T>none	T>none_ATT	A/T-1_AAAACTT	6	707	FALSE	FALSE
24_v.txt	32779	32779-Deletion-C--	Deletion	1	C	-	61	32052	0.190316	46.1803	msh3	FALSE	CAN	JSY15	1	msh3-Rep1	ACC	nope	>1bp-ins	G/C-1	none	G/C-1	AAGCGACCCAGAA	CCCAGAA	TGG	ACC	C	none	nope	nope_ACC	G/C-1_CCCAGAA	6	688	FALSE	FALSE
24_v.txt	32811	32811-Deletion-G--	Deletion	1	G	-	66	32052	0.205915	46.0606	msh3	FALSE	CAN	JSY15	1	msh3-Rep1	AGG	nope	>1bp-ins	G/C-1	none	G/C-1	TTGACAGGGAACA	GGGAACA	TCC	TCC	C	none	C>none	C>none_TCC	G/C-1_GGGAACA	6	656	FALSE	FALSE
24_v.txt	32839	32839-Deletion-C--	Deletion	1	C	-	22	32052	0.0686385	45.7273	msh3	FALSE	CAN	JSY15	1	msh3-Rep1	ACC	nope	>1bp-ins	G/C-1	none	G/C-1	TAATTACCCAAAA	CCCAAAA	TGG	ACC	C	none	nope	nope_ACC	G/C-1_CCCAAAA	6	628	FALSE	FALSE
24_v.txt	32842	32842-Deletion-A--	Deletion	1	A	-	1282	32052	3.99975	41.9181	msh3	FALSE	CAN	JSY15	1	msh3-Rep1	CAA	nope	>1bp-ins	A/T-1	none	A/T-1	TTACCCAAAAAAT	AAAAAAT	GTT	GTT	T	none	T>none	T>none_GTT	A/T-1_AAAAAAT	6	625	FALSE	FALSE
24_v.txt	32868	32868-Deletion-G--	Deletion	1	G	-	69	32042	0.215342	37.6377	msh3	FALSE	CAN	JSY15	1	msh3-Rep1	TGG	nope	>1bp-ins	G/C-1	none	G/C-1	GCCAGTGGAACTT	GGAACTT	ACC	ACC	C	none	C>none	C>none_ACC	G/C-1_GGAACTT	6	599	FALSE	FALSE
24_v.txt	32876	32876-Deletion-G--	Deletion	1	G	-	8	29069	0.0275207	37.625	msh3	FALSE	CAN	JSY15	1	msh3-Rep1	TGT	nope	>1bp-ins	G/C-1	none	G/C-1	AACTTTGTACGTC	GTACGTC	ACA	ACA	C	none	C>none	C>none_ACA	G/C-1_GTACGTC	6	591	FALSE	FALSE
24_v.txt	32880	32880-Deletion-G--	Deletion	1	G	-	37	29073	0.127266	36.973	msh3	FALSE	CAN	JSY15	1	msh3-Rep1	CGT	nope	>1bp-ins	G/C-1	none	G/C-1	TTGTACGTCCAAA	GTCCAAA	GCA	GCA	C	none	C>none	C>none_GCA	G/C-1_GTCCAAA	6	587	FALSE	FALSE
24_v.txt	32884	32884-Deletion-A--	Deletion	1	A	-	111	29073	0.381798	37.0631	msh3	FALSE	CAN	JSY15	1	msh3-Rep1	CAA	nope	>1bp-ins	A/T-1	none	A/T-1	ACGTCCAAAATTG	AAAATTG	GTT	GTT	T	none	T>none	T>none_GTT	A/T-1_AAAATTG	6	583	FALSE	FALSE
24_v.txt	32901	32901-Deletion-C--	Deletion	1	C	-	37	29073	0.127266	37.4595	msh3	FALSE	CAN	JSY15	1	msh3-Rep1	GCC	nope	>1bp-ins	G/C-1	none	G/C-1	ACTTGGCCAACTA	CCAACTA	CGG	GCC	C	none	nope	nope_GCC	G/C-1_CCAACTA	6	566	FALSE	FALSE
24_v.txt	32911	32911-Deletion-T--	Deletion	1	T	-	11	29073	0.0378358	51.2727	msh3	FALSE	CAN	JSY15	1	msh3-Rep1	CTA	nope	>1bp-ins	A/T-1	none	A/T-1	CTACACTAAGTTC	TAAGTTC	GAT	CTA	T	none	nope	nope_CTA	A/T-1_TAAGTTC	6	556	FALSE	FALSE
24_v.txt	32919	32919-Deletion-A--	Deletion	1	A	-	23	29073	0.0791112	54.6957	msh3	FALSE	CAN	JSY15	1	msh3-Rep1	CAG	nope	>1bp-ins	A/T-1	none	A/T-1	AGTTCCAGGGCAA	AGGGCAA	GTC	GTC	T	none	T>none	T>none_GTC	A/T-1_AGGGCAA	6	548	FALSE	FALSE
24_v.txt	32924	32924-Deletion-A--	Deletion	1	A	-	58	29073	0.199498	52.5517	msh3	FALSE	CAN	JSY15	1	msh3-Rep1	CAA	nope	>1bp-ins	A/T-1	none	A/T-1	CAGGGCAAAAGTG	AAAAGTG	GTT	GTT	T	none	T>none	T>none_GTT	A/T-1_AAAAGTG	6	543	FALSE	FALSE
24_v.txt	32958	32958-Deletion-C--	Deletion	1	C	-	12	29073	0.0412754	61.5	msh3	FALSE	CAN	JSY15	1	msh3-Rep1	ACC	nope	>1bp-ins	G/C-1	none	G/C-1	ATGTAACCATTGG	CCATTGG	TGG	ACC	C	none	nope	nope_ACC	G/C-1_CCATTGG	6	509	FALSE	FALSE
24_v.txt	32967	32967-Deletion-G--	Deletion	1	G	-	20	29073	0.0687924	61.65	msh3	FALSE	CAN	JSY15	1	msh3-Rep1	CGC	nope	>1bp-ins	G/C-1	none	G/C-1	TTGGCCGCACCAA	GCACCAA	GCG	GCG	C	none	C>none	C>none_GCG	G/C-1_GCACCAA	6	500	FALSE	FALSE
24_v.txt	32968	32968-Deletion-C--	Deletion	1	C	-	44	29072	0.151348	59.4545	msh3	FALSE	CAN	JSY15	1	msh3-Rep1	GCA	nope	>1bp-ins	G/C-1	none	G/C-1	TGGCCGCACCAAA	CACCAAA	CGT	GCA	C	none	nope	nope_GCA	G/C-1_CACCAAA	6	499	FALSE	FALSE
24_v.txt	32970	32970-Deletion-C--	Deletion	1	C	-	41	29072	0.141029	60	msh3	FALSE	CAN	JSY15	1	msh3-Rep1	ACC	nope	>1bp-ins	G/C-1	none	G/C-1	GCCGCACCAAATG	CCAAATG	TGG	ACC	C	none	nope	nope_ACC	G/C-1_CCAAATG	6	497	FALSE	FALSE
24_v.txt	33000	33000-Deletion-A--	Deletion	1	A	-	27	29073	0.0928697	62.2222	msh3	FALSE	CAN	JSY15	1	msh3-Rep1	GAA	nope	>1bp-ins	A/T-1	none	A/T-1	TGTGAGAAAACTG	AAAACTG	CTT	CTT	T	none	T>none	T>none_CTT	A/T-1_AAAACTG	6	467	FALSE	FALSE
24_v.txt	33006	33006-Deletion-G--	Deletion	1	G	-	4	29073	0.0137585	64	msh3	FALSE	CAN	JSY15	1	msh3-Rep1	TGT	nope	>1bp-ins	G/C-1	none	G/C-1	AAAACTGTGAAAG	GTGAAAG	ACA	ACA	C	none	C>none	C>none_ACA	G/C-1_GTGAAAG	6	461	FALSE	FALSE
24_v.txt	33018	33018-Deletion-G--	Deletion	1	G	-	34	29074	0.116943	59.4706	msh3	FALSE	CAN	JSY15	1	msh3-Rep1	TGT	nope	>1bp-ins	G/C-1	none	G/C-1	GAGGATGTAACAG	GTAACAG	ACA	ACA	C	none	C>none	C>none_ACA	G/C-1_GTAACAG	6	449	FALSE	FALSE
24_v.txt	33024	33024-Deletion-G--	Deletion	1	G	-	35	29074	0.120382	62.2	msh3	FALSE	CAN	JSY15	1	msh3-Rep1	AGG	nope	>1bp-ins	G/C-1	none	G/C-1	GTAACAGGGATGA	GGGATGA	TCC	TCC	C	none	C>none	C>none_TCC	G/C-1_GGGATGA	6	443	FALSE	FALSE
24_v.txt	33036	33036-Deletion-G--	Deletion	1	G	-	7	29074	0.0240765	60.2857	msh3	FALSE	CAN	JSY15	1	msh3-Rep1	AGC	nope	>1bp-ins	G/C-1	none	G/C-1	AATGTAGCCATTT	GCCATTT	TCG	TCG	C	none	C>none	C>none_TCG	G/C-1_GCCATTT	6	431	FALSE	FALSE
24_v.txt	33045	33045-Deletion-C--	Deletion	1	C	-	10	29074	0.034395	61.1	msh3	FALSE	CAN	JSY15	1	msh3-Rep1	ACC	nope	>1bp-ins	G/C-1	none	G/C-1	ATTTCACCCAAGG	CCCAAGG	TGG	ACC	C	none	nope	nope_ACC	G/C-1_CCCAAGG	6	422	FALSE	FALSE
24_v.txt	33063	33063-Deletion-G--	Deletion	1	G	-	21	29074	0.0722295	58.2381	msh3	FALSE	CAN	JSY15	1	msh3-Rep1	AGA	nope	>1bp-ins	G/C-1	none	G/C-1	GTGACAGAATATG	GAATATG	TCT	TCT	C	none	C>none	C>none_TCT	G/C-1_GAATATG	6	404	FALSE	FALSE
24_v.txt	33072	33072-Deletion-A--	Deletion	1	A	-	3	29074	0.0103185	55.3333	msh3	FALSE	CAN	JSY15	1	msh3-Rep1	CAA	nope	>1bp-ins	A/T-1	none	A/T-1	TATGCCAAAGAAC	AAAGAAC	GTT	GTT	T	none	T>none	T>none_GTT	A/T-1_AAAGAAC	6	395	FALSE	FALSE
24_v.txt	33078	33078-Deletion-C--	Deletion	1	C	-	31	29074	0.106624	55.7097	msh3	FALSE	CAN	JSY15	1	msh3-Rep1	ACC	nope	>1bp-ins	G/C-1	none	G/C-1	AAAGAACCCATAA	CCCATAA	TGG	ACC	C	none	nope	nope_ACC	G/C-1_CCCATAA	6	389	FALSE	FALSE
24_v.txt	33083	33083-Deletion-A--	Deletion	1	A	-	3	29074	0.0103185	55	msh3	FALSE	CAN	JSY15	1	msh3-Rep1	TAA	nope	>1bp-ins	A/T-1	none	A/T-1	ACCCATAAATAAA	AAATAAA	ATT	ATT	T	none	T>none	T>none_ATT	A/T-1_AAATAAA	6	384	FALSE	FALSE
24_v.txt	33104	33104-Deletion-G--	Deletion	1	G	-	21	29074	0.0722295	47.7143	msh3	FALSE	CAN	JSY15	1	msh3-Rep1	CGC	nope	>1bp-ins	G/C-1	none	G/C-1	AAGAGCGCCCACT	GCCCACT	GCG	GCG	C	none	C>none	C>none_GCG	G/C-1_GCCCACT	6	363	FALSE	FALSE
24_v.txt	33114	33114-Deletion-C--	Deletion	1	C	-	2	29074	0.006879	38	msh3	FALSE	CAN	JSY15	1	msh3-Rep1	GCC	nope	>1bp-ins	G/C-1	none	G/C-1	ACTGGGCCGGCGT	CCGGCGT	CGG	GCC	C	none	nope	nope_GCC	G/C-1_CCGGCGT	6	353	FALSE	FALSE
24_v.txt	33141	33141-Deletion-C--	Deletion	1	C	-	15	29074	0.0515925	41.8	msh3	FALSE	CAN	JSY15	1	msh3-Rep1	ACC	nope	>1bp-ins	G/C-1	none	G/C-1	GATAAACCAATGA	CCAATGA	TGG	ACC	C	none	nope	nope_ACC	G/C-1_CCAATGA	6	326	FALSE	FALSE
24_v.txt	33168	33168-Deletion-C--	Deletion	1	C	-	2	29022	0.006891	38	msh3	FALSE	CAN	JSY15	1	msh3-Rep1	ACC	nope	>1bp-ins	G/C-1	none	G/C-1	ATAGTACCACCAA	CCACCAA	TGG	ACC	C	none	nope	nope_ACC	G/C-1_CCACCAA	6	299	FALSE	FALSE
24_v.txt	33211	33211-Deletion-T--	Deletion	1	T	-	2	24799	0.008065	37.5	msh3	FALSE	CAN	JSY15	1	msh3-Rep1	CTC	nope	>1bp-ins	A/T-1	none	A/T-1	GCTCTCTCTTCAC	TCTTCAC	GAG	CTC	T	none	nope	nope_CTC	A/T-1_TCTTCAC	6	256	FALSE	FALSE
24_v.txt	33213	33213-Deletion-T--	Deletion	1	T	-	7	24799	0.0282269	41.5714	msh3	FALSE	CAN	JSY15	1	msh3-Rep1	CTT	nope	>1bp-ins	A/T-1	none	A/T-1	TCTCTCTTCACTT	TTCACTT	GAA	CTT	T	none	nope	nope_CTT	A/T-1_TTCACTT	6	254	FALSE	FALSE
24_v.txt	33258	33258-Deletion-C--	Deletion	1	C	-	6	24839	0.0241556	38	msh3	FALSE	CAN	JSY15	1	msh3-Rep1	GCC	nope	>1bp-ins	G/C-1	none	G/C-1	CCTATGCCATCCT	CCATCCT	CGG	GCC	C	none	nope	nope_GCC	G/C-1_CCATCCT	6	209	FALSE	FALSE
24_v.txt	33292	33292-Deletion-C--	Deletion	1	C	-	8	24839	0.0322074	56.375	msh3	FALSE	CAN	JSY15	1	msh3-Rep1	ACT	nope	>1bp-ins	G/C-1	none	G/C-1	CATTTACTCTCGT	CTCTCGT	TGA	ACT	C	none	nope	nope_ACT	G/C-1_CTCTCGT	6	175	FALSE	FALSE
24_v.txt	33331	33331-Deletion-T--	Deletion	1	T	-	20	24839	0.0805185	61.4	msh3	FALSE	CAN	JSY15	1	msh3-Rep1	CTT	nope	>1bp-ins	A/T-1	none	A/T-1	CTTTACTTTTCTC	TTTTCTC	GAA	CTT	T	none	nope	nope_CTT	A/T-1_TTTTCTC	6	136	FALSE	FALSE
24_v.txt	33356	33356-Deletion-C--	Deletion	1	C	-	126	24839	0.507267	55.9921	msh3	FALSE	CAN	JSY15	1	msh3-Rep1	ACC	nope	>1bp-ins	G/C-1	none	G/C-1	TATTGACCCACGT	CCCACGT	TGG	ACC	C	none	nope	nope_ACC	G/C-1_CCCACGT	6	111	FALSE	FALSE
24_v.txt	33361	33361-Deletion-G--	Deletion	1	G	-	11	24838	0.044287	63.7273	msh3	FALSE	CAN	JSY15	1	msh3-Rep1	CGT	nope	>1bp-ins	G/C-1	none	G/C-1	ACCCACGTCTGTG	GTCTGTG	GCA	GCA	C	none	C>none	C>none_GCA	G/C-1_GTCTGTG	6	106	FALSE	FALSE
24_v.txt	33373	33373-Deletion-T--	Deletion	1	T	-	28	24835	0.112744	55.3571	msh3	FALSE	CAN	JSY15	1	msh3-Rep1	GTT	nope	>1bp-ins	A/T-1	none	A/T-1	GGTGTGTTTGTGA	TTTGTGA	CAA	GTT	T	none	nope	nope_GTT	A/T-1_TTTGTGA	6	94	FALSE	FALSE
24_v.txt	33376	33376-Deletion-G--	Deletion	1	G	-	4	24835	0.0161063	64	msh3	FALSE	CAN	JSY15	1	msh3-Rep1	TGT	nope	>1bp-ins	G/C-1	none	G/C-1	GTGTTTGTGAAGC	GTGAAGC	ACA	ACA	C	none	C>none	C>none_ACA	G/C-1_GTGAAGC	6	91	FALSE	FALSE
24_v.txt	33474	33474-Deletion-C--	Deletion	1	C	-	62	24833	0.249668	30.5968	msh3	FALSE	CAN	JSY15	1	msh3-Rep1	GCC	nope	>1bp-ins	G/C-1	none	G/C-1	GCTATGCCTTTTT	CCTTTTT	CGG	GCC	C	none	nope	nope_GCC	G/C-1_CCTTTTT	6	N_A	FALSE	FALSE
25_v.txt	31723	31723-SNV-A-C	SNV	1	A	C	3	8973	0.0334336	63.9991	msh3	FALSE	CAN	JSY15	2	msh3-Rep2	CAA	A>C	G/C+1	A/T-1	TA>GC	TA>GC	TGTCCCAAAAAGT	AAAAAGT	GTT	GTT	T	G	T>G	T>G_GTT	TA>GC_AAAAAGT	6	1744	FALSE	FALSE
25_v.txt	32055	32055-SNV-T-G	SNV	1	T	G	9	12293	0.0732124	63	msh3	FALSE	CAN	JSY15	2	msh3-Rep2	GTG	T>G	G/C+1	A/T-1	TA>GC	TA>GC	CTGATGTGCGAGA	TGCGAGA	CAC	GTG	T	C	T>G	T>G_GTG	TA>GC_TGCGAGA	6	1412	FALSE	FALSE
25_v.txt	32493	32493-SNV-A-C	SNV	1	A	C	3	15198	0.0197394	46.6662	msh3	FALSE	CAN	JSY15	2	msh3-Rep2	AAC	A>C	G/C+1	A/T-1	TA>GC	TA>GC	CGGAAAACAACTT	ACAACTT	TTG	TTG	T	G	T>G	T>G_TTG	TA>GC_ACAACTT	6	974	FALSE	FALSE
25_v.txt	32732	32732-SNV-A-C	SNV	1	A	C	4	23347	0.0171328	42.75	msh3	FALSE	CAN	JSY15	2	msh3-Rep2	AAC	A>C	G/C+1	A/T-1	TA>GC	TA>GC	ACAAAAACAGTAT	ACAGTAT	TTG	TTG	T	G	T>G	T>G_TTG	TA>GC_ACAGTAT	6	735	FALSE	FALSE
25_v.txt	32842	32842-SNV-A-C	SNV	1	A	C	6	23346	0.0257003	46.6665	msh3	FALSE	CAN	JSY15	2	msh3-Rep2	CAA	A>C	G/C+1	A/T-1	TA>GC	TA>GC	TTACCCAAAAAAT	AAAAAAT	GTT	GTT	T	G	T>G	T>G_GTT	TA>GC_AAAAAAT	6	625	FALSE	FALSE
25_v.txt	32884	32884-SNV-A-C	SNV	1	A	C	7	24950	0.0280561	37.7128	msh3	FALSE	CAN	JSY15	2	msh3-Rep2	CAA	A>C	G/C+1	A/T-1	TA>GC	TA>GC	ACGTCCAAAATTG	AAAATTG	GTT	GTT	T	G	T>G	T>G_GTT	TA>GC_AAAATTG	6	583	FALSE	FALSE
25_v.txt	33081	33081-SNV-A-C	SNV	1	A	C	1	24950	0.004008	63.9983	msh3	FALSE	CAN	JSY15	2	msh3-Rep2	CAT	A>C	G/C+1	A/T-1	TA>GC	TA>GC	GAACCCATAAATA	ATAAATA	GTA	GTA	T	G	T>G	T>G_GTA	TA>GC_ATAAATA	6	386	FALSE	FALSE
25_v.txt	33084	33084-SNV-A-C	SNV	1	A	C	7	24950	0.0280561	35.1429	msh3	FALSE	CAN	JSY15	2	msh3-Rep2	AAA	A>C	G/C+1	A/T-1	TA>GC	TA>GC	CCCATAAATAAAT	AATAAAT	TTT	TTT	T	G	T>G	T>G_TTT	TA>GC_AATAAAT	6	383	FALSE	FALSE
25_v.txt	33099	33099-SNV-A-C	SNV	1	A	C	6	24950	0.0240481	48.3333	msh3	FALSE	CAN	JSY15	2	msh3-Rep2	AAG	A>C	G/C+1	A/T-1	TA>GC	TA>GC	GATATAAGAGCGC	AGAGCGC	TTC	TTC	T	G	T>G	T>G_TTC	TA>GC_AGAGCGC	6	368	FALSE	FALSE
25_v.txt	33207	33207-SNV-T-G	SNV	1	T	G	1	11716	0.008535	37.9976	msh3	FALSE	CAN	JSY15	2	msh3-Rep2	CTC	T>G	G/C+1	A/T-1	TA>GC	TA>GC	TTAAGCTCTCTCT	TCTCTCT	GAG	CTC	T	C	T>G	T>G_CTC	TA>GC_TCTCTCT	6	260	FALSE	FALSE
25_v.txt	33269	33269-SNV-A-C	SNV	1	A	C	91	11717	0.776649	15.2527	msh3	FALSE	CAN	JSY15	2	msh3-Rep2	TAG	A>C	G/C+1	A/T-1	TA>GC	TA>GC	CTCCATAGAGAAC	AGAGAAC	ATC	ATC	T	G	T>G	T>G_ATC	TA>GC_AGAGAAC	6	198	FALSE	FALSE
25_v.txt	31904	31904-SNV-T-C	SNV	1	T	C	3	8973	0.0334336	36.9999	msh3	FALSE	CAN	JSY15	2	msh3-Rep2	ATT	T>C	G/C+1	A/T-1	TA>CG	TA>CG	ATTGAATTTTGGT	TTTTGGT	TAA	ATT	T	G	T>C	T>C_ATT	TA>CG_TTTTGGT	6	1563	FALSE	FALSE
25_v.txt	32081	32081-SNV-A-G	SNV	1	A	G	5	12293	0.0406736	55.5997	msh3	FALSE	CAN	JSY15	2	msh3-Rep2	CAA	A>G	G/C+1	A/T-1	TA>CG	TA>CG	CCATGCAAAAAAG	AAAAAAG	GTT	GTT	T	C	T>C	T>C_GTT	TA>CG_AAAAAAG	6	1386	FALSE	FALSE
25_v.txt	32337	32337-SNV-A-G	SNV	1	A	G	3	15198	0.0197394	45.3301	msh3	FALSE	CAN	JSY15	2	msh3-Rep2	GAT	A>G	G/C+1	A/T-1	TA>CG	TA>CG	TTGAAGATATGTG	ATATGTG	CTA	CTA	T	C	T>C	T>C_CTA	TA>CG_ATATGTG	6	1130	FALSE	FALSE
25_v.txt	32338	32338-SNV-T-C	SNV	1	T	C	3	15198	0.0197394	47.6642	msh3	FALSE	CAN	JSY15	2	msh3-Rep2	ATA	T>C	G/C+1	A/T-1	TA>CG	TA>CG	TGAAGATATGTGG	TATGTGG	TAT	ATA	T	G	T>C	T>C_ATA	TA>CG_TATGTGG	6	1129	FALSE	FALSE
25_v.txt	32680	32680-SNV-A-G	SNV	1	A	G	55	23347	0.235576	60.7091	msh3	FALSE	CAN	JSY15	2	msh3-Rep2	CAA	A>G	G/C+1	A/T-1	TA>CG	TA>CG	TTCTCCAATAACG	AATAACG	GTT	GTT	T	C	T>C	T>C_GTT	TA>CG_AATAACG	6	787	FALSE	FALSE
25_v.txt	32884	32884-SNV-A-G	SNV	1	A	G	4	24950	0.0160321	33.9988	msh3	FALSE	CAN	JSY15	2	msh3-Rep2	CAA	A>G	G/C+1	A/T-1	TA>CG	TA>CG	ACGTCCAAAATTG	AAAATTG	GTT	GTT	T	C	T>C	T>C_GTT	TA>CG_AAAATTG	6	583	FALSE	FALSE
25_v.txt	33065	33065-SNV-A-G	SNV	1	A	G	3	24950	0.012024	63.9972	msh3	FALSE	CAN	JSY15	2	msh3-Rep2	AAT	A>G	G/C+1	A/T-1	TA>CG	TA>CG	GACAGAATATGCC	ATATGCC	TTA	TTA	T	C	T>C	T>C_TTA	TA>CG_ATATGCC	6	402	FALSE	FALSE
25_v.txt	33066	33066-SNV-T-C	SNV	1	T	C	4	24950	0.0160321	43.25	msh3	FALSE	CAN	JSY15	2	msh3-Rep2	ATA	T>C	G/C+1	A/T-1	TA>CG	TA>CG	ACAGAATATGCCA	TATGCCA	TAT	ATA	T	G	T>C	T>C_ATA	TA>CG_TATGCCA	6	401	FALSE	FALSE
25_v.txt	33086	33086-SNV-T-C	SNV	1	T	C	7	24950	0.0280561	37.2857	msh3	FALSE	CAN	JSY15	2	msh3-Rep2	ATA	T>C	G/C+1	A/T-1	TA>CG	TA>CG	CATAAATAAATAT	TAAATAT	TAT	ATA	T	G	T>C	T>C_ATA	TA>CG_TAAATAT	6	381	FALSE	FALSE
25_v.txt	33099	33099-SNV-A-G	SNV	1	A	G	17	24950	0.0681363	40.1765	msh3	FALSE	CAN	JSY15	2	msh3-Rep2	AAG	A>G	G/C+1	A/T-1	TA>CG	TA>CG	GATATAAGAGCGC	AGAGCGC	TTC	TTC	T	C	T>C	T>C_TTC	TA>CG_AGAGCGC	6	368	FALSE	FALSE
25_v.txt	33126	33126-SNV-A-G	SNV	1	A	G	21	24950	0.0841683	40.1913	msh3	FALSE	CAN	JSY15	2	msh3-Rep2	CAG	A>G	G/C+1	A/T-1	TA>CG	TA>CG	TTGGTCAGAGGTG	AGAGGTG	GTC	GTC	T	C	T>C	T>C_GTC	TA>CG_AGAGGTG	6	341	FALSE	FALSE
25_v.txt	33192	33192-SNV-T-C	SNV	1	T	C	17	11718	0.145076	31.4118	msh3	FALSE	CAN	JSY15	2	msh3-Rep2	ATG	T>C	G/C+1	A/T-1	TA>CG	TA>CG	CCAATATGTCTTT	TGTCTTT	TAC	ATG	T	G	T>C	T>C_ATG	TA>CG_TGTCTTT	6	275	FALSE	FALSE
25_v.txt	33207	33207-SNV-T-C	SNV	1	T	C	7	11716	0.0597474	12.2857	msh3	FALSE	CAN	JSY15	2	msh3-Rep2	CTC	T>C	G/C+1	A/T-1	TA>CG	TA>CG	TTAAGCTCTCTCT	TCTCTCT	GAG	CTC	T	G	T>C	T>C_CTC	TA>CG_TCTCTCT	6	260	FALSE	FALSE
25_v.txt	31874	31874-SNV-A-T	SNV	1	A	T	23	8973	0.256325	45.7391	msh3	FALSE	CAN	JSY15	2	msh3-Rep2	TAT	A>T	A/T+1	A/T-1	TA>AT	TA>AT	AGAGATATAGGCG	ATAGGCG	ATA	ATA	T	A	T>A	T>A_ATA	TA>AT_ATAGGCG	6	1593	FALSE	FALSE
25_v.txt	32264	32264-SNV-T-A	SNV	1	T	A	11	15198	0.0723779	37.7273	msh3	FALSE	CAN	JSY15	2	msh3-Rep2	ATA	T>A	A/T+1	A/T-1	TA>AT	TA>AT	ACCAAATAAAATA	TAAAATA	TAT	ATA	T	T	T>A	T>A_ATA	TA>AT_TAAAATA	6	1203	FALSE	FALSE
25_v.txt	32456	32456-SNV-T-A	SNV	1	T	A	2	15198	0.0131596	40.4992	msh3	FALSE	CAN	JSY15	2	msh3-Rep2	ATA	T>A	A/T+1	A/T-1	TA>AT	TA>AT	AATGAATAATAGA	TAATAGA	TAT	ATA	T	T	T>A	T>A_ATA	TA>AT_TAATAGA	6	1011	FALSE	FALSE
25_v.txt	32473	32473-SNV-A-T	SNV	1	A	T	1	15198	0.00658	34.9999	msh3	FALSE	CAN	JSY15	2	msh3-Rep2	TAG	A>T	A/T+1	A/T-1	TA>AT	TA>AT	CAATGTAGAAGGT	AGAAGGT	ATC	ATC	T	A	T>A	T>A_ATC	TA>AT_AGAAGGT	6	994	FALSE	FALSE
25_v.txt	32677	32677-SNV-T-A	SNV	1	T	A	33	23347	0.141346	62.0909	msh3	FALSE	CAN	JSY15	2	msh3-Rep2	CTC	T>A	A/T+1	A/T-1	TA>AT	TA>AT	GGTTTCTCCAATA	TCCAATA	GAG	CTC	T	T	T>A	T>A_CTC	TA>AT_TCCAATA	6	790	FALSE	FALSE
25_v.txt	32732	32732-SNV-A-T	SNV	1	A	T	15	23347	0.0642481	57.3333	msh3	FALSE	CAN	JSY15	2	msh3-Rep2	AAC	A>T	A/T+1	A/T-1	TA>AT	TA>AT	ACAAAAACAGTAT	ACAGTAT	TTG	TTG	T	A	T>A	T>A_TTG	TA>AT_ACAGTAT	6	735	FALSE	FALSE
25_v.txt	32767	32767-SNV-T-A	SNV	1	T	A	18	23347	0.0770977	49.2222	msh3	FALSE	CAN	JSY15	2	msh3-Rep2	TTG	T>A	A/T+1	A/T-1	TA>AT	TA>AT	AAACTTTGATGGA	TGATGGA	AAC	TTG	T	T	T>A	T>A_TTG	TA>AT_TGATGGA	6	700	FALSE	FALSE
25_v.txt	33066	33066-SNV-T-A	SNV	1	T	A	3	24950	0.012024	52.6663	msh3	FALSE	CAN	JSY15	2	msh3-Rep2	ATA	T>A	A/T+1	A/T-1	TA>AT	TA>AT	ACAGAATATGCCA	TATGCCA	TAT	ATA	T	T	T>A	T>A_ATA	TA>AT_TATGCCA	6	401	FALSE	FALSE
25_v.txt	33082	33082-SNV-T-A	SNV	1	T	A	1	24950	0.004008	63.9945	msh3	FALSE	CAN	JSY15	2	msh3-Rep2	ATA	T>A	A/T+1	A/T-1	TA>AT	TA>AT	AACCCATAAATAA	TAAATAA	TAT	ATA	T	T	T>A	T>A_ATA	TA>AT_TAAATAA	6	385	FALSE	FALSE
25_v.txt	33099	33099-SNV-A-T	SNV	1	A	T	7	24950	0.0280561	56	msh3	FALSE	CAN	JSY15	2	msh3-Rep2	AAG	A>T	A/T+1	A/T-1	TA>AT	TA>AT	GATATAAGAGCGC	AGAGCGC	TTC	TTC	T	A	T>A	T>A_TTC	TA>AT_AGAGCGC	6	368	FALSE	FALSE
25_v.txt	31650	31650-SNV-C-T	SNV	1	C	T	23	8972	0.256353	34.8696	msh3	FALSE	CAN	JSY15	2	msh3-Rep2	GCG	C>T	A/T+1	G/C-1	CG>TA	CG>TA	AGAATGCGAAATG	CGAAATG	CGC	GCG	C	A	C>T	C>T_GCG	CG>TA_CGAAATG	6	1817	FALSE	FALSE
25_v.txt	31830	31830-SNV-C-T	SNV	1	C	T	19	8973	0.211746	53.3684	msh3	FALSE	CAN	JSY15	2	msh3-Rep2	GCA	C>T	A/T+1	G/C-1	CG>TA	CG>TA	AATATGCATTGAA	CATTGAA	CGT	GCA	C	A	C>T	C>T_GCA	CG>TA_CATTGAA	6	1637	FALSE	FALSE
25_v.txt	31881	31881-SNV-G-A	SNV	1	G	A	12	8973	0.133735	37.5814	msh3	FALSE	CAN	JSY15	2	msh3-Rep2	GGC	G>A	A/T+1	G/C-1	CG>TA	CG>TA	TAGGCGGCAGCAA	GCAGCAA	CCG	CCG	C	T	C>T	C>T_CCG	CG>TA_GCAGCAA	6	1586	FALSE	FALSE
25_v.txt	31882	31882-SNV-C-T	SNV	1	C	T	18	8973	0.200602	41.8313	msh3	FALSE	CAN	JSY15	2	msh3-Rep2	GCA	C>T	A/T+1	G/C-1	CG>TA	CG>TA	AGGCGGCAGCAAA	CAGCAAA	CGT	GCA	C	A	C>T	C>T_GCA	CG>TA_CAGCAAA	6	1585	FALSE	FALSE
25_v.txt	31962	31962-SNV-G-A	SNV	1	G	A	27	12293	0.219637	36.1852	msh3	FALSE	CAN	JSY15	2	msh3-Rep2	CGC	G>A	A/T+1	G/C-1	CG>TA	CG>TA	GTGGCCGCATAAT	GCATAAT	GCG	GCG	C	T	C>T	C>T_GCG	CG>TA_GCATAAT	6	1505	FALSE	FALSE
25_v.txt	32079	32079-SNV-G-A	SNV	1	G	A	13	12293	0.105751	61.6923	msh3	FALSE	CAN	JSY15	2	msh3-Rep2	TGC	G>A	A/T+1	G/C-1	CG>TA	CG>TA	AACCATGCAAAAA	GCAAAAA	ACG	ACG	C	T	C>T	C>T_ACG	CG>TA_GCAAAAA	6	1388	FALSE	FALSE
25_v.txt	32092	32092-SNV-C-T	SNV	1	C	T	17	12293	0.13829	62.2353	msh3	FALSE	CAN	JSY15	2	msh3-Rep2	GCA	C>T	A/T+1	G/C-1	CG>TA	CG>TA	AGCCTGCAACACC	CAACACC	CGT	GCA	C	A	C>T	C>T_GCA	CG>TA_CAACACC	6	1375	FALSE	FALSE
25_v.txt	32165	32165-SNV-G-A	SNV	1	G	A	21	12293	0.170829	44.9048	msh3	FALSE	CAN	JSY15	2	msh3-Rep2	CGC	G>A	A/T+1	G/C-1	CG>TA	CG>TA	CAAAGCGCCAAAT	GCCAAAT	GCG	GCG	C	T	C>T	C>T_GCG	CG>TA_GCCAAAT	6	1302	FALSE	FALSE
25_v.txt	32271	32271-SNV-C-T	SNV	1	C	T	27	15198	0.177655	30.6668	msh3	FALSE	CAN	JSY15	2	msh3-Rep2	ACG	C>T	A/T+1	G/C-1	CG>TA	CG>TA	AAAATACGGGAAC	CGGGAAC	TGC	ACG	C	A	C>T	C>T_ACG	CG>TA_CGGGAAC	6	1196	FALSE	FALSE
25_v.txt	32272	32272-SNV-G-A	SNV	1	G	A	28	15198	0.184235	36.1429	msh3	FALSE	CAN	JSY15	2	msh3-Rep2	CGG	G>A	A/T+1	G/C-1	CG>TA	CG>TA	AAATACGGGAACC	GGGAACC	GCC	GCC	C	T	C>T	C>T_GCC	CG>TA_GGGAACC	6	1195	FALSE	FALSE
25_v.txt	32299	32299-SNV-C-T	SNV	1	C	T	26	15198	0.171075	47.3846	msh3	FALSE	CAN	JSY15	2	msh3-Rep2	GCG	C>T	A/T+1	G/C-1	CG>TA	CG>TA	AATTTGCGGCAGA	CGGCAGA	CGC	GCG	C	A	C>T	C>T_GCG	CG>TA_CGGCAGA	6	1168	FALSE	FALSE
25_v.txt	32466	32466-SNV-C-T	SNV	1	C	T	20	15198	0.131596	52.0982	msh3	FALSE	CAN	JSY15	2	msh3-Rep2	GCC	C>T	A/T+1	G/C-1	CG>TA	CG>TA	AGAGAGCCAATGT	CCAATGT	CGG	GCC	C	A	C>T	C>T_GCC	CG>TA_CCAATGT	6	1001	FALSE	FALSE
25_v.txt	32487	32487-SNV-C-T	SNV	1	C	T	20	15198	0.131596	46.8	msh3	FALSE	CAN	JSY15	2	msh3-Rep2	ACG	C>T	A/T+1	G/C-1	CG>TA	CG>TA	AAGATACGGAAAA	CGGAAAA	TGC	ACG	C	A	C>T	C>T_ACG	CG>TA_CGGAAAA	6	980	FALSE	FALSE
25_v.txt	32536	32536-SNV-C-T	SNV	1	C	T	18	15198	0.118437	37	msh3	FALSE	CAN	JSY15	2	msh3-Rep2	GCA	C>T	A/T+1	G/C-1	CG>TA	CG>TA	GGTTTGCAGCTTC	CAGCTTC	CGT	GCA	C	A	C>T	C>T_GCA	CG>TA_CAGCTTC	6	931	FALSE	FALSE
25_v.txt	32566	32566-SNV-C-T	SNV	1	C	T	42	23311	0.180172	36.3571	msh3	FALSE	CAN	JSY15	2	msh3-Rep2	TCA	C>T	A/T+1	G/C-1	CG>TA	CG>TA	CTAGTTCAGTACC	CAGTACC	AGT	TCA	C	A	C>T	C>T_TCA	CG>TA_CAGTACC	6	901	FALSE	FALSE
25_v.txt	32590	32590-SNV-C-T	SNV	1	C	T	48	23347	0.205594	37.0833	msh3	FALSE	CAN	JSY15	2	msh3-Rep2	GCG	C>T	A/T+1	G/C-1	CG>TA	CG>TA	AGGCAGCGTTAAT	CGTTAAT	CGC	GCG	C	A	C>T	C>T_GCG	CG>TA_CGTTAAT	6	877	FALSE	FALSE
25_v.txt	32700	32700-SNV-C-T	SNV	1	C	T	32	23347	0.137063	63.25	msh3	FALSE	CAN	JSY15	2	msh3-Rep2	GCC	C>T	A/T+1	G/C-1	CG>TA	CG>TA	ACTGGGCCGGTAA	CCGGTAA	CGG	GCC	C	A	C>T	C>T_GCC	CG>TA_CCGGTAA	6	767	FALSE	FALSE
25_v.txt	32702	32702-SNV-G-A	SNV	1	G	A	27	23347	0.115647	59.8519	msh3	FALSE	CAN	JSY15	2	msh3-Rep2	CGG	G>A	A/T+1	G/C-1	CG>TA	CG>TA	TGGGCCGGTAACC	GGTAACC	GCC	GCC	C	T	C>T	C>T_GCC	CG>TA_GGTAACC	6	765	FALSE	FALSE
25_v.txt	32757	32757-SNV-G-A	SNV	1	G	A	23	23347	0.0985137	55.1739	msh3	FALSE	CAN	JSY15	2	msh3-Rep2	GGC	G>A	A/T+1	G/C-1	CG>TA	CG>TA	ATAATGGCTAAAA	GCTAAAA	CCG	CCG	C	T	C>T	C>T_CCG	CG>TA_GCTAAAA	6	710	FALSE	FALSE
25_v.txt	32775	32775-SNV-G-A	SNV	1	G	A	722	23347	3.09247	50.0734	msh3	FALSE	CAN	JSY15	2	msh3-Rep2	AGC	G>A	A/T+1	G/C-1	CG>TA	CG>TA	ATGGAAGCGACCC	GCGACCC	TCG	TCG	C	T	C>T	C>T_TCG	CG>TA_GCGACCC	6	692	FALSE	FALSE
25_v.txt	32796	32796-SNV-C-T	SNV	1	C	T	34	23347	0.145629	48.8522	msh3	FALSE	CAN	JSY15	2	msh3-Rep2	ACC	C>T	A/T+1	G/C-1	CG>TA	CG>TA	AATTCACCGTAAT	CCGTAAT	TGG	ACC	C	A	C>T	C>T_ACC	CG>TA_CCGTAAT	6	671	FALSE	FALSE
25_v.txt	32798	32798-SNV-G-A	SNV	1	G	A	38	23347	0.162762	42.5789	msh3	FALSE	CAN	JSY15	2	msh3-Rep2	CGT	G>A	A/T+1	G/C-1	CG>TA	CG>TA	TTCACCGTAATAT	GTAATAT	GCA	GCA	C	T	C>T	C>T_GCA	CG>TA_GTAATAT	6	669	FALSE	FALSE
25_v.txt	32860	32860-SNV-C-T	SNV	1	C	T	25	23343	0.107098	36.56	msh3	FALSE	CAN	JSY15	2	msh3-Rep2	GCC	C>T	A/T+1	G/C-1	CG>TA	CG>TA	TCCATGCCGCCAG	CCGCCAG	CGG	GCC	C	A	C>T	C>T_GCC	CG>TA_CCGCCAG	6	607	FALSE	FALSE
25_v.txt	32900	32900-SNV-G-A	SNV	1	G	A	32	24950	0.128257	46.2038	msh3	FALSE	CAN	JSY15	2	msh3-Rep2	GGC	G>A	A/T+1	G/C-1	CG>TA	CG>TA	GACTTGGCCAACT	GCCAACT	CCG	CCG	C	T	C>T	C>T_CCG	CG>TA_GCCAACT	6	567	FALSE	FALSE
25_v.txt	32901	32901-SNV-C-T	SNV	1	C	T	59	24950	0.236473	38.7965	msh3	FALSE	CAN	JSY15	2	msh3-Rep2	GCC	C>T	A/T+1	G/C-1	CG>TA	CG>TA	ACTTGGCCAACTA	CCAACTA	CGG	GCC	C	A	C>T	C>T_GCC	CG>TA_CCAACTA	6	566	FALSE	FALSE
25_v.txt	32935	32935-SNV-C-T	SNV	1	C	T	37	24950	0.148297	40.2973	msh3	FALSE	CAN	JSY15	2	msh3-Rep2	GCC	C>T	A/T+1	G/C-1	CG>TA	CG>TA	TGATTGCCCAAGA	CCCAAGA	CGG	GCC	C	A	C>T	C>T_GCC	CG>TA_CCCAAGA	6	532	FALSE	FALSE
25_v.txt	32965	32965-SNV-C-T	SNV	1	C	T	19	24950	0.0761523	61.8421	msh3	FALSE	CAN	JSY15	2	msh3-Rep2	GCC	C>T	A/T+1	G/C-1	CG>TA	CG>TA	CATTGGCCGCACC	CCGCACC	CGG	GCC	C	A	C>T	C>T_GCC	CG>TA_CCGCACC	6	502	FALSE	FALSE
25_v.txt	32967	32967-SNV-G-A	SNV	1	G	A	46	24950	0.184369	62.0217	msh3	FALSE	CAN	JSY15	2	msh3-Rep2	CGC	G>A	A/T+1	G/C-1	CG>TA	CG>TA	TTGGCCGCACCAA	GCACCAA	GCG	GCG	C	T	C>T	C>T_GCG	CG>TA_GCACCAA	6	500	FALSE	FALSE
25_v.txt	33055	33055-SNV-G-A	SNV	1	G	A	36	24950	0.144289	52.5	msh3	FALSE	CAN	JSY15	2	msh3-Rep2	TGC	G>A	A/T+1	G/C-1	CG>TA	CG>TA	AGGACTGCGTGAC	GCGTGAC	ACG	ACG	C	T	C>T	C>T_ACG	CG>TA_GCGTGAC	6	412	FALSE	FALSE
25_v.txt	33056	33056-SNV-C-T	SNV	1	C	T	38	24950	0.152305	57.2877	msh3	FALSE	CAN	JSY15	2	msh3-Rep2	GCG	C>T	A/T+1	G/C-1	CG>TA	CG>TA	GGACTGCGTGACA	CGTGACA	CGC	GCG	C	A	C>T	C>T_GCG	CG>TA_CGTGACA	6	411	FALSE	FALSE
25_v.txt	33069	33069-SNV-G-A	SNV	1	G	A	27	24950	0.108216	50.9273	msh3	FALSE	CAN	JSY15	2	msh3-Rep2	TGC	G>A	A/T+1	G/C-1	CG>TA	CG>TA	GAATATGCCAAAG	GCCAAAG	ACG	ACG	C	T	C>T	C>T_ACG	CG>TA_GCCAAAG	6	398	FALSE	FALSE
25_v.txt	33070	33070-SNV-C-T	SNV	1	C	T	40	24950	0.160321	53.75	msh3	FALSE	CAN	JSY15	2	msh3-Rep2	GCC	C>T	A/T+1	G/C-1	CG>TA	CG>TA	AATATGCCAAAGA	CCAAAGA	CGG	GCC	C	A	C>T	C>T_GCC	CG>TA_CCAAAGA	6	397	FALSE	FALSE
25_v.txt	33114	33114-SNV-C-T	SNV	1	C	T	29	24950	0.116232	41.4135	msh3	FALSE	CAN	JSY15	2	msh3-Rep2	GCC	C>T	A/T+1	G/C-1	CG>TA	CG>TA	ACTGGGCCGGCGT	CCGGCGT	CGG	GCC	C	A	C>T	C>T_GCC	CG>TA_CCGGCGT	6	353	FALSE	FALSE
25_v.txt	33115	33115-SNV-C-T	SNV	1	C	T	24	24949	0.0961962	42.5822	msh3	FALSE	CAN	JSY15	2	msh3-Rep2	CCG	C>T	A/T+1	G/C-1	CG>TA	CG>TA	CTGGGCCGGCGTT	CGGCGTT	GGC	CCG	C	A	C>T	C>T_CCG	CG>TA_CGGCGTT	6	352	FALSE	FALSE
25_v.txt	33118	33118-SNV-C-T	SNV	1	C	T	27	24950	0.108216	44.6667	msh3	FALSE	CAN	JSY15	2	msh3-Rep2	GCG	C>T	A/T+1	G/C-1	CG>TA	CG>TA	GGCCGGCGTTGGT	CGTTGGT	CGC	GCG	C	A	C>T	C>T_GCG	CG>TA_CGTTGGT	6	349	FALSE	FALSE
25_v.txt	33156	33156-SNV-G-A	SNV	1	G	A	87	24949	0.348711	37.7356	msh3	FALSE	CAN	JSY15	2	msh3-Rep2	TGT	G>A	A/T+1	G/C-1	CG>TA	CG>TA	AGACCTGTACCAA	GTACCAA	ACA	ACA	C	T	C>T	C>T_ACA	CG>TA_GTACCAA	6	311	FALSE	FALSE
25_v.txt	33258	33258-SNV-C-T	SNV	1	C	T	17	11717	0.145088	42.5294	msh3	FALSE	CAN	JSY15	2	msh3-Rep2	GCC	C>T	A/T+1	G/C-1	CG>TA	CG>TA	CCTATGCCATCCT	CCATCCT	CGG	GCC	C	A	C>T	C>T_GCC	CG>TA_CCATCCT	6	209	FALSE	FALSE
25_v.txt	33276	33276-SNV-G-A	SNV	1	G	A	18	11717	0.153623	44.4444	msh3	FALSE	CAN	JSY15	2	msh3-Rep2	CGT	G>A	A/T+1	G/C-1	CG>TA	CG>TA	GAGAACGTATCCT	GTATCCT	GCA	GCA	C	T	C>T	C>T_GCA	CG>TA_GTATCCT	6	191	FALSE	FALSE
25_v.txt	33309	33309-SNV-C-T	SNV	1	C	T	17	11717	0.145088	55.0534	msh3	FALSE	CAN	JSY15	2	msh3-Rep2	GCG	C>T	A/T+1	G/C-1	CG>TA	CG>TA	AAAGAGCGCAATG	CGCAATG	CGC	GCG	C	A	C>T	C>T_GCG	CG>TA_CGCAATG	6	158	FALSE	FALSE
25_v.txt	33310	33310-SNV-G-A	SNV	1	G	A	16	11716	0.136565	57.1675	msh3	FALSE	CAN	JSY15	2	msh3-Rep2	CGC	G>A	A/T+1	G/C-1	CG>TA	CG>TA	AAGAGCGCAATGG	GCAATGG	GCG	GCG	C	T	C>T	C>T_GCG	CG>TA_GCAATGG	6	157	FALSE	FALSE
25_v.txt	33412	33412-SNV-G-A	SNV	1	G	A	15	11717	0.128019	54.1333	msh3	FALSE	CAN	JSY15	2	msh3-Rep2	GGC	G>A	A/T+1	G/C-1	CG>TA	CG>TA	TGACCGGCTCATT	GCTCATT	CCG	CCG	C	T	C>T	C>T_CCG	CG>TA_GCTCATT	6	55	FALSE	FALSE
25_v.txt	33474	33474-SNV-C-T	SNV	1	C	T	17	11716	0.145101	35.6471	msh3	FALSE	CAN	JSY15	2	msh3-Rep2	GCC	C>T	A/T+1	G/C-1	CG>TA	CG>TA	GCTATGCCTTTTT	CCTTTTT	CGG	GCC	C	A	C>T	C>T_GCC	CG>TA_CCTTTTT	6	N_A	FALSE	FALSE
25_v.txt	32453	32453-SNV-G-C	SNV	1	G	C	1	15198	0.00658	61.9941	msh3	FALSE	CAN	JSY15	2	msh3-Rep2	TGA	G>C	G/C+1	G/C-1	CG>GC	CG>GC	TCCAATGAATAAT	GAATAAT	ACT	ACT	C	G	C>G	C>G_ACT	CG>GC_GAATAAT	6	1014	FALSE	FALSE
25_v.txt	32474	32474-SNV-G-C	SNV	1	G	C	2	15198	0.0131596	61.9891	msh3	FALSE	CAN	JSY15	2	msh3-Rep2	AGA	G>C	G/C+1	G/C-1	CG>GC	CG>GC	AATGTAGAAGGTT	GAAGGTT	TCT	TCT	C	G	C>G	C>G_TCT	CG>GC_GAAGGTT	6	993	FALSE	FALSE
25_v.txt	32798	32798-SNV-G-C	SNV	1	G	C	3	23347	0.0128496	41.3333	msh3	FALSE	CAN	JSY15	2	msh3-Rep2	CGT	G>C	G/C+1	G/C-1	CG>GC	CG>GC	TTCACCGTAATAT	GTAATAT	GCA	GCA	C	G	C>G	C>G_GCA	CG>GC_GTAATAT	6	669	FALSE	FALSE
25_v.txt	32819	32819-SNV-G-C	SNV	1	G	C	13	23347	0.0556817	40.6154	msh3	FALSE	CAN	JSY15	2	msh3-Rep2	AGT	G>C	G/C+1	G/C-1	CG>GC	CG>GC	GAACAAGTTCATT	GTTCATT	TCA	TCA	C	G	C>G	C>G_TCA	CG>GC_GTTCATT	6	648	FALSE	FALSE
25_v.txt	33093	33093-SNV-G-C	SNV	1	G	C	13	24950	0.0521042	52.6154	msh3	FALSE	CAN	JSY15	2	msh3-Rep2	TGA	G>C	G/C+1	G/C-1	CG>GC	CG>GC	AAATATGATATAA	GATATAA	ACT	ACT	C	G	C>G	C>G_ACT	CG>GC_GATATAA	6	374	FALSE	FALSE
25_v.txt	33118	33118-SNV-C-G	SNV	1	C	G	4	24950	0.0160321	49.5	msh3	FALSE	CAN	JSY15	2	msh3-Rep2	GCG	C>G	G/C+1	G/C-1	CG>GC	CG>GC	GGCCGGCGTTGGT	CGTTGGT	CGC	GCG	C	C	C>G	C>G_GCG	CG>GC_CGTTGGT	6	349	FALSE	FALSE
25_v.txt	33168	33168-SNV-C-G	SNV	1	C	G	5	24947	0.0200425	37.8	msh3	FALSE	CAN	JSY15	2	msh3-Rep2	ACC	C>G	G/C+1	G/C-1	CG>GC	CG>GC	ATAGTACCACCAA	CCACCAA	TGG	ACC	C	C	C>G	C>G_ACC	CG>GC_CCACCAA	6	299	FALSE	FALSE
25_v.txt	33310	33310-SNV-G-C	SNV	1	G	C	1	11716	0.008535	63.9776	msh3	FALSE	CAN	JSY15	2	msh3-Rep2	CGC	G>C	G/C+1	G/C-1	CG>GC	CG>GC	AAGAGCGCAATGG	GCAATGG	GCG	GCG	C	G	C>G	C>G_GCG	CG>GC_GCAATGG	6	157	FALSE	FALSE
25_v.txt	31817	31817-SNV-G-T	SNV	1	G	T	7	8973	0.0780118	64	msh3	FALSE	CAN	JSY15	2	msh3-Rep2	TGC	G>T	A/T+1	G/C-1	CG>AT	CG>AT	AAATCTGCATCTG	GCATCTG	ACG	ACG	C	A	C>A	C>A_ACG	CG>AT_GCATCTG	6	1650	FALSE	FALSE
25_v.txt	31882	31882-SNV-C-A	SNV	1	C	A	6	8973	0.0668673	15.4964	msh3	FALSE	CAN	JSY15	2	msh3-Rep2	GCA	C>A	A/T+1	G/C-1	CG>AT	CG>AT	AGGCGGCAGCAAA	CAGCAAA	CGT	GCA	C	T	C>A	C>A_GCA	CG>AT_CAGCAAA	6	1585	FALSE	FALSE
25_v.txt	31901	31901-SNV-G-T	SNV	1	G	T	10	8973	0.111445	42.1	msh3	FALSE	CAN	JSY15	2	msh3-Rep2	TGA	G>T	A/T+1	G/C-1	CG>AT	CG>AT	ACCATTGAATTTT	GAATTTT	ACT	ACT	C	A	C>A	C>A_ACT	CG>AT_GAATTTT	6	1566	FALSE	FALSE
25_v.txt	31909	31909-SNV-G-T	SNV	1	G	T	10	8973	0.111445	42.6	msh3	FALSE	CAN	JSY15	2	msh3-Rep2	GGT	G>T	A/T+1	G/C-1	CG>AT	CG>AT	ATTTTGGTGCAAA	GTGCAAA	CCA	CCA	C	A	C>A	C>A_CCA	CG>AT_GTGCAAA	6	1558	FALSE	FALSE
25_v.txt	32271	32271-SNV-C-A	SNV	1	C	A	3	15198	0.0197394	33.3335	msh3	FALSE	CAN	JSY15	2	msh3-Rep2	ACG	C>A	A/T+1	G/C-1	CG>AT	CG>AT	AAAATACGGGAAC	CGGGAAC	TGC	ACG	C	T	C>A	C>A_ACG	CG>AT_CGGGAAC	6	1196	FALSE	FALSE
25_v.txt	32272	32272-SNV-G-T	SNV	1	G	T	9	15198	0.0592183	25.6667	msh3	FALSE	CAN	JSY15	2	msh3-Rep2	CGG	G>T	A/T+1	G/C-1	CG>AT	CG>AT	AAATACGGGAACC	GGGAACC	GCC	GCC	C	A	C>A	C>A_GCC	CG>AT_GGGAACC	6	1195	FALSE	FALSE
25_v.txt	32453	32453-SNV-G-T	SNV	1	G	T	1	15198	0.00658	37.9991	msh3	FALSE	CAN	JSY15	2	msh3-Rep2	TGA	G>T	A/T+1	G/C-1	CG>AT	CG>AT	TCCAATGAATAAT	GAATAAT	ACT	ACT	C	A	C>A	C>A_ACT	CG>AT_GAATAAT	6	1014	FALSE	FALSE
25_v.txt	32629	32629-SNV-C-A	SNV	1	C	A	48	23347	0.205594	52.7292	msh3	FALSE	CAN	JSY15	2	msh3-Rep2	TCG	C>A	A/T+1	G/C-1	CG>AT	CG>AT	TCCCTTCGTTTTT	CGTTTTT	AGC	TCG	C	T	C>A	C>A_TCG	CG>AT_CGTTTTT	6	838	FALSE	FALSE
25_v.txt	32797	32797-SNV-C-A	SNV	1	C	A	21	23347	0.0899473	41.332	msh3	FALSE	CAN	JSY15	2	msh3-Rep2	CCG	C>A	A/T+1	G/C-1	CG>AT	CG>AT	ATTCACCGTAATA	CGTAATA	GGC	CCG	C	T	C>A	C>A_CCG	CG>AT_CGTAATA	6	670	FALSE	FALSE
25_v.txt	32798	32798-SNV-G-T	SNV	1	G	T	21	23347	0.0899473	47.3333	msh3	FALSE	CAN	JSY15	2	msh3-Rep2	CGT	G>T	A/T+1	G/C-1	CG>AT	CG>AT	TTCACCGTAATAT	GTAATAT	GCA	GCA	C	A	C>A	C>A_GCA	CG>AT_GTAATAT	6	669	FALSE	FALSE
25_v.txt	32876	32876-SNV-G-T	SNV	1	G	T	50	24942	0.200465	35.52	msh3	FALSE	CAN	JSY15	2	msh3-Rep2	TGT	G>T	A/T+1	G/C-1	CG>AT	CG>AT	AACTTTGTACGTC	GTACGTC	ACA	ACA	C	A	C>A	C>A_ACA	CG>AT_GTACGTC	6	591	FALSE	FALSE
25_v.txt	33024	33024-SNV-G-T	SNV	1	G	T	19	24950	0.0761523	55.2105	msh3	FALSE	CAN	JSY15	2	msh3-Rep2	AGG	G>T	A/T+1	G/C-1	CG>AT	CG>AT	GTAACAGGGATGA	GGGATGA	TCC	TCC	C	A	C>A	C>A_TCC	CG>AT_GGGATGA	6	443	FALSE	FALSE
25_v.txt	33050	33050-SNV-G-T	SNV	1	G	T	8	24950	0.0320641	63.625	msh3	FALSE	CAN	JSY15	2	msh3-Rep2	AGG	G>T	A/T+1	G/C-1	CG>AT	CG>AT	ACCCAAGGACTGC	GGACTGC	TCC	TCC	C	A	C>A	C>A_TCC	CG>AT_GGACTGC	6	417	FALSE	FALSE
25_v.txt	33055	33055-SNV-G-T	SNV	1	G	T	3	24950	0.012024	54.6667	msh3	FALSE	CAN	JSY15	2	msh3-Rep2	TGC	G>T	A/T+1	G/C-1	CG>AT	CG>AT	AGGACTGCGTGAC	GCGTGAC	ACG	ACG	C	A	C>A	C>A_ACG	CG>AT_GCGTGAC	6	412	FALSE	FALSE
25_v.txt	33070	33070-SNV-C-A	SNV	1	C	A	5	24950	0.0200401	54.2	msh3	FALSE	CAN	JSY15	2	msh3-Rep2	GCC	C>A	A/T+1	G/C-1	CG>AT	CG>AT	AATATGCCAAAGA	CCAAAGA	CGG	GCC	C	T	C>A	C>A_GCC	CG>AT_CCAAAGA	6	397	FALSE	FALSE
25_v.txt	33122	33122-SNV-G-T	SNV	1	G	T	7	24950	0.0280561	37.5714	msh3	FALSE	CAN	JSY15	2	msh3-Rep2	TGG	G>T	A/T+1	G/C-1	CG>AT	CG>AT	GGCGTTGGTCAGA	GGTCAGA	ACC	ACC	C	A	C>A	C>A_ACC	CG>AT_GGTCAGA	6	345	FALSE	FALSE
25_v.txt	33151	33151-SNV-G-T	SNV	1	G	T	14	24950	0.0561122	35.2857	msh3	FALSE	CAN	JSY15	2	msh3-Rep2	AGA	G>T	A/T+1	G/C-1	CG>AT	CG>AT	TGAAAAGACCTGT	GACCTGT	TCT	TCT	C	A	C>A	C>A_TCT	CG>AT_GACCTGT	6	316	FALSE	FALSE
25_v.txt	33238	33238-SNV-C-A	SNV	1	C	A	21	11717	0.179227	39.4762	msh3	FALSE	CAN	JSY15	2	msh3-Rep2	CCT	C>A	A/T+1	G/C-1	CG>AT	CG>AT	CTTCTCCTTCATC	CTTCATC	GGA	CCT	C	T	C>A	C>A_CCT	CG>AT_CTTCATC	6	229	FALSE	FALSE
25_v.txt	33474	33474-SNV-C-A	SNV	1	C	A	35	11716	0.298737	33.8857	msh3	FALSE	CAN	JSY15	2	msh3-Rep2	GCC	C>A	A/T+1	G/C-1	CG>AT	CG>AT	GCTATGCCTTTTT	CCTTTTT	CGG	GCC	C	T	C>A	C>A_GCC	CG>AT_CCTTTTT	6	N_A	FALSE	FALSE
25_v.txt	33475	33475-SNV-C-A	SNV	1	C	A	11	11716	0.0938887	37.3231	msh3	FALSE	CAN	JSY15	2	msh3-Rep2	CCT	C>A	A/T+1	G/C-1	CG>AT	CG>AT	CTATGCCTTTTTT	CTTTTTT	GGA	CCT	C	T	C>A	C>A_CCT	CG>AT_CTTTTTT	6	N_A	FALSE	FALSE
25_v.txt	32504	32504-Replacement-G-AT	Replacement	2	G	AT	23	15198	0.151336	42.0434	msh3	FALSE	CAN	JSY15	2	msh3-Rep2	TGA	nope	>1bp-ins	G/C-1	none	Replac.	TTTTTTGATGGCT	GATGGCT	ACT	ACT	C	none	C>none	C>none_ACT	Replac._GATGGCT	6	963	FALSE	FALSE
25_v.txt	33080	33080-Replacement-CATAA-G	Replacement	5	CATAA	G	1	24950	0.004008	38	msh3	FALSE	CAN	JSY15	2	msh3-Rep2	CCA	nope	G/C+1	>1bpdel	none	Replac.	AGAACCCATAAAT	CATAAAT	GGT	CCA	CATAA	C	NA	NA_CCA	Replac._CATAAAT	6	387	FALSE	FALSE
25_v.txt	33083	33083-Replacement-AA-C	Replacement	2	AA	C	1	24950	0.004008	63	msh3	FALSE	CAN	JSY15	2	msh3-Rep2	TAA	nope	G/C+1	>1bpdel	none	Replac.	ACCCATAAATAAA	AAATAAA	ATT	TAA	AA	G	NA	NA_TAA	Replac._AAATAAA	6	384	FALSE	FALSE
25_v.txt	32456	32456-MNV-TA-AT	MNV	2	TA	AT	1	15198	0.00658	64	msh3	FALSE	CAN	JSY15	2	msh3-Rep2	ATA	nope	>1bp-ins	>1bpdel	none	MNV	AATGAATAATAGA	TAATAGA	TAT	ATA	TA	none	NA	NA_ATA	MNV_TAATAGA	6	1011	FALSE	FALSE
25_v.txt	31723	31723-Insertion---A	Insertion	1	-	A	2	8973	0.0222891	64	msh3	FALSE	CAN	JSY15	2	msh3-Rep2	CAA	nope	A/T+1	>1bpdel	none	A/T+1	TGTCCCAAAAAGT	AAAAAGT	GTT	CAA	-	T	NA	NA_CAA	A/T+1_AAAAAGT	6	1744	FALSE	FALSE
25_v.txt	31904	31904-Insertion---T	Insertion	1	-	T	10	8973	0.111445	42.7	msh3	FALSE	CAN	JSY15	2	msh3-Rep2	ATT	nope	A/T+1	>1bpdel	none	A/T+1	ATTGAATTTTGGT	TTTTGGT	TAA	ATT	-	A	NA	NA_ATT	A/T+1_TTTTGGT	6	1563	FALSE	FALSE
25_v.txt	32028	32028-Insertion---A	Insertion	1	-	A	6	12293	0.0488083	59.6667	msh3	FALSE	CAN	JSY15	2	msh3-Rep2	GTA	nope	A/T+1	>1bpdel	none	A/T+1	CCACGGTATTTCA	TATTTCA	CAT	GTA	-	T	NA	NA_GTA	A/T+1_TATTTCA	6	1439	FALSE	FALSE
25_v.txt	32081	32081-Insertion---A	Insertion	1	-	A	9	12293	0.0732124	64	msh3	FALSE	CAN	JSY15	2	msh3-Rep2	CAA	nope	A/T+1	>1bpdel	none	A/T+1	CCATGCAAAAAAG	AAAAAAG	GTT	CAA	-	T	NA	NA_CAA	A/T+1_AAAAAAG	6	1386	FALSE	FALSE
25_v.txt	32261	32261-Insertion---A	Insertion	1	-	A	11	15197	0.0723827	37.9091	msh3	FALSE	CAN	JSY15	2	msh3-Rep2	CAA	nope	A/T+1	>1bpdel	none	A/T+1	TAGACCAAATAAA	AAATAAA	GTT	CAA	-	T	NA	NA_CAA	A/T+1_AAATAAA	6	1206	FALSE	FALSE
25_v.txt	32454	32454-Insertion---A	Insertion	1	-	A	1	15198	0.00658	64	msh3	FALSE	CAN	JSY15	2	msh3-Rep2	GAA	nope	A/T+1	>1bpdel	none	A/T+1	CCAATGAATAATA	AATAATA	CTT	GAA	-	T	NA	NA_GAA	A/T+1_AATAATA	6	1013	FALSE	FALSE
25_v.txt	32842	32842-Insertion---A	Insertion	1	-	A	47	23346	0.201319	41.4681	msh3	FALSE	CAN	JSY15	2	msh3-Rep2	CAA	nope	A/T+1	>1bpdel	none	A/T+1	TTACCCAAAAAAT	AAAAAAT	GTT	CAA	-	T	NA	NA_CAA	A/T+1_AAAAAAT	6	625	FALSE	FALSE
25_v.txt	32884	32884-Insertion---A	Insertion	1	-	A	4	24950	0.0160321	34.25	msh3	FALSE	CAN	JSY15	2	msh3-Rep2	CAA	nope	A/T+1	>1bpdel	none	A/T+1	ACGTCCAAAATTG	AAAATTG	GTT	CAA	-	T	NA	NA_CAA	A/T+1_AAAATTG	6	583	FALSE	FALSE
25_v.txt	33081	33081-Insertion---ATAA	Insertion	4	-	ATAA	39	24950	0.156313	53.0256	msh3	FALSE	CAN	JSY15	2	msh3-Rep2	CAT	nope	>1bp-ins	>1bpdel	none	>1bp-ins	GAACCCATAAATA	ATAAATA	GTA	CAT	-	none	NA	NA_CAT	>1bp-ins_ATAAATA	6	386	FALSE	FALSE
25_v.txt	33452	33452-Insertion---T	Insertion	1	-	T	5	11717	0.042673	43.2	msh3	FALSE	CAN	JSY15	2	msh3-Rep2	CTT	nope	A/T+1	>1bpdel	none	A/T+1	GTCTTCTTTTGAA	TTTTGAA	GAA	CTT	-	A	NA	NA_CTT	A/T+1_TTTTGAA	6	15	FALSE	FALSE
25_v.txt	32337	32337-Deletion-AT--	Deletion	2	AT	-	106	15198	0.69746	59.5566	msh3	FALSE	CAN	JSY15	2	msh3-Rep2	GAT	nope	>1bp-ins	>1bpdel	none	>1bpdel	TTGAAGATATGTG	ATATGTG	CTA	GAT	AT	none	NA	NA_GAT	>1bpdel_ATATGTG	6	1130	FALSE	FALSE
25_v.txt	32448	32448-Deletion-CC--	Deletion	2	CC	-	7	15198	0.0460587	54.4286	msh3	FALSE	CAN	JSY15	2	msh3-Rep2	TCC	nope	>1bp-ins	>1bpdel	none	>1bpdel	AAAAGTCCAATGA	CCAATGA	AGG	TCC	CC	none	NA	NA_TCC	>1bpdel_CCAATGA	6	1019	FALSE	FALSE
25_v.txt	32452	32452-Deletion-TGA--	Deletion	3	TGA	-	7	15198	0.0460587	54.4286	msh3	FALSE	CAN	JSY15	2	msh3-Rep2	ATG	nope	>1bp-ins	>1bpdel	none	>1bpdel	GTCCAATGAATAA	TGAATAA	TAC	ATG	TGA	none	NA	NA_ATG	>1bpdel_TGAATAA	6	1015	FALSE	FALSE
25_v.txt	32456	32456-Deletion-TA--	Deletion	2	TA	-	7	15198	0.0460587	54.4286	msh3	FALSE	CAN	JSY15	2	msh3-Rep2	ATA	nope	>1bp-ins	>1bpdel	none	>1bpdel	AATGAATAATAGA	TAATAGA	TAT	ATA	TA	none	NA	NA_ATA	>1bpdel_TAATAGA	6	1011	FALSE	FALSE
25_v.txt	32473	32473-Deletion-AGA--	Deletion	3	AGA	-	11	15198	0.0723779	44.8182	msh3	FALSE	CAN	JSY15	2	msh3-Rep2	TAG	nope	>1bp-ins	>1bpdel	none	>1bpdel	CAATGTAGAAGGT	AGAAGGT	ATC	TAG	AGA	none	NA	NA_TAG	>1bpdel_AGAAGGT	6	994	FALSE	FALSE
25_v.txt	32492	32492-Deletion-AAC--	Deletion	3	AAC	-	12	15198	0.0789578	43.1667	msh3	FALSE	CAN	JSY15	2	msh3-Rep2	AAA	nope	>1bp-ins	>1bpdel	none	>1bpdel	ACGGAAAACAACT	AACAACT	TTT	AAA	AAC	none	NA	NA_AAA	>1bpdel_AACAACT	6	975	FALSE	FALSE
25_v.txt	33065	33065-Deletion-AT--	Deletion	2	AT	-	28	24950	0.112224	56.3571	msh3	FALSE	CAN	JSY15	2	msh3-Rep2	AAT	nope	>1bp-ins	>1bpdel	none	>1bpdel	GACAGAATATGCC	ATATGCC	TTA	AAT	AT	none	NA	NA_AAT	>1bpdel_ATATGCC	6	402	FALSE	FALSE
25_v.txt	33080	33080-Deletion-CA--	Deletion	2	CA	-	4	24950	0.0160321	51.5	msh3	FALSE	CAN	JSY15	2	msh3-Rep2	CCA	nope	>1bp-ins	>1bpdel	none	>1bpdel	AGAACCCATAAAT	CATAAAT	GGT	CCA	CA	none	NA	NA_CCA	>1bpdel_CATAAAT	6	387	FALSE	FALSE
25_v.txt	33080	33080-Deletion-CAT--	Deletion	3	CAT	-	7	24950	0.0280561	22.4286	msh3	FALSE	CAN	JSY15	2	msh3-Rep2	CCA	nope	>1bp-ins	>1bpdel	none	>1bpdel	AGAACCCATAAAT	CATAAAT	GGT	CCA	CAT	none	NA	NA_CCA	>1bpdel_CATAAAT	6	387	FALSE	FALSE
25_v.txt	33080	33080-Deletion-CATA--	Deletion	4	CATA	-	10	24950	0.0400802	19.3	msh3	FALSE	CAN	JSY15	2	msh3-Rep2	CCA	nope	>1bp-ins	>1bpdel	none	>1bpdel	AGAACCCATAAAT	CATAAAT	GGT	CCA	CATA	none	NA	NA_CCA	>1bpdel_CATAAAT	6	387	FALSE	FALSE
25_v.txt	33080	33080-Deletion-CATAA--	Deletion	5	CATAA	-	1	24950	0.004008	58	msh3	FALSE	CAN	JSY15	2	msh3-Rep2	CCA	nope	>1bp-ins	>1bpdel	none	>1bpdel	AGAACCCATAAAT	CATAAAT	GGT	CCA	CATAA	none	NA	NA_CCA	>1bpdel_CATAAAT	6	387	FALSE	FALSE
25_v.txt	33081	33081-Deletion-ATAA--	Deletion	4	ATAA	-	20850	24950	83.5671	53.3874	msh3	FALSE	CAN	JSY15	2	msh3-Rep2	CAT	nope	>1bp-ins	>1bpdel	none	>1bpdel	GAACCCATAAATA	ATAAATA	GTA	CAT	ATAA	none	NA	NA_CAT	>1bpdel_ATAAATA	6	386	FALSE	FALSE
25_v.txt	33083	33083-Deletion-AA--	Deletion	2	AA	-	3	24950	0.012024	48	msh3	FALSE	CAN	JSY15	2	msh3-Rep2	TAA	nope	>1bp-ins	>1bpdel	none	>1bpdel	ACCCATAAATAAA	AAATAAA	ATT	TAA	AA	none	NA	NA_TAA	>1bpdel_AAATAAA	6	384	FALSE	FALSE
25_v.txt	33083	33083-Deletion-AAA--	Deletion	3	AAA	-	2	24950	0.008016	64	msh3	FALSE	CAN	JSY15	2	msh3-Rep2	TAA	nope	>1bp-ins	>1bpdel	none	>1bpdel	ACCCATAAATAAA	AAATAAA	ATT	TAA	AAA	none	NA	NA_TAA	>1bpdel_AAATAAA	6	384	FALSE	FALSE
25_v.txt	33083	33083-Deletion-AAAT--	Deletion	4	AAAT	-	1	24950	0.004008	38	msh3	FALSE	CAN	JSY15	2	msh3-Rep2	TAA	nope	>1bp-ins	>1bpdel	none	>1bpdel	ACCCATAAATAAA	AAATAAA	ATT	TAA	AAAT	none	NA	NA_TAA	>1bpdel_AAATAAA	6	384	FALSE	FALSE
25_v.txt	33084	33084-Deletion-AAT--	Deletion	3	AAT	-	4	24950	0.0160321	44.5	msh3	FALSE	CAN	JSY15	2	msh3-Rep2	AAA	nope	>1bp-ins	>1bpdel	none	>1bpdel	CCCATAAATAAAT	AATAAAT	TTT	AAA	AAT	none	NA	NA_AAA	>1bpdel_AATAAAT	6	383	FALSE	FALSE
25_v.txt	33126	33126-Deletion-AG--	Deletion	2	AG	-	29	24950	0.116232	41.8966	msh3	FALSE	CAN	JSY15	2	msh3-Rep2	CAG	nope	>1bp-ins	>1bpdel	none	>1bpdel	TTGGTCAGAGGTG	AGAGGTG	GTC	CAG	AG	none	NA	NA_CAG	>1bpdel_AGAGGTG	6	341	FALSE	FALSE
25_v.txt	33189	33189-Deletion-AT--	Deletion	2	AT	-	22	11720	0.187713	37	msh3	FALSE	CAN	JSY15	2	msh3-Rep2	AAT	nope	>1bp-ins	>1bpdel	none	>1bpdel	ATACCAATATGTC	ATATGTC	TTA	AAT	AT	none	NA	NA_AAT	>1bpdel_ATATGTC	6	278	FALSE	FALSE
25_v.txt	33206	33206-Deletion-CT--	Deletion	2	CT	-	13	11717	0.11095	36.8462	msh3	FALSE	CAN	JSY15	2	msh3-Rep2	GCT	nope	>1bp-ins	>1bpdel	none	>1bpdel	CTTAAGCTCTCTC	CTCTCTC	CGA	GCT	CT	none	NA	NA_GCT	>1bpdel_CTCTCTC	6	261	FALSE	FALSE
25_v.txt	33474	33474-Deletion-CC--	Deletion	2	CC	-	1	11716	0.008535	10	msh3	FALSE	CAN	JSY15	2	msh3-Rep2	GCC	nope	>1bp-ins	>1bpdel	none	>1bpdel	GCTATGCCTTTTT	CCTTTTT	CGG	GCC	CC	none	NA	NA_GCC	>1bpdel_CCTTTTT	6	N_A	FALSE	FALSE
25_v.txt	31723	31723-Deletion-A--	Deletion	1	A	-	8	8973	0.0891564	63.25	msh3	FALSE	CAN	JSY15	2	msh3-Rep2	CAA	nope	>1bp-ins	A/T-1	none	A/T-1	TGTCCCAAAAAGT	AAAAAGT	GTT	GTT	T	none	T>none	T>none_GTT	A/T-1_AAAAAGT	6	1744	FALSE	FALSE
25_v.txt	31904	31904-Deletion-T--	Deletion	1	T	-	12	8973	0.133735	47.5	msh3	FALSE	CAN	JSY15	2	msh3-Rep2	ATT	nope	>1bp-ins	A/T-1	none	A/T-1	ATTGAATTTTGGT	TTTTGGT	TAA	ATT	T	none	nope	nope_ATT	A/T-1_TTTTGGT	6	1563	FALSE	FALSE
25_v.txt	31913	31913-Deletion-A--	Deletion	1	A	-	4	8973	0.0445782	38	msh3	FALSE	CAN	JSY15	2	msh3-Rep2	CAA	nope	>1bp-ins	A/T-1	none	A/T-1	TGGTGCAAAAGCC	AAAAGCC	GTT	GTT	T	none	T>none	T>none_GTT	A/T-1_AAAAGCC	6	1554	FALSE	FALSE
25_v.txt	31923	31923-Deletion-A--	Deletion	1	A	-	6	8973	0.0668673	38	msh3	FALSE	CAN	JSY15	2	msh3-Rep2	GAA	nope	>1bp-ins	A/T-1	none	A/T-1	GCCGTGAAACCTT	AAACCTT	CTT	CTT	T	none	T>none	T>none_CTT	A/T-1_AAACCTT	6	1544	FALSE	FALSE
25_v.txt	31979	31979-Deletion-G--	Deletion	1	G	-	20	12293	0.162694	40.05	msh3	FALSE	CAN	JSY15	2	msh3-Rep2	CGG	nope	>1bp-ins	G/C-1	none	G/C-1	CAAGCCGGGCATT	GGGCATT	GCC	GCC	C	none	C>none	C>none_GCC	G/C-1_GGGCATT	6	1488	FALSE	FALSE
25_v.txt	32081	32081-Deletion-A--	Deletion	1	A	-	15	12293	0.122021	62.2667	msh3	FALSE	CAN	JSY15	2	msh3-Rep2	CAA	nope	>1bp-ins	A/T-1	none	A/T-1	CCATGCAAAAAAG	AAAAAAG	GTT	GTT	T	none	T>none	T>none_GTT	A/T-1_AAAAAAG	6	1386	FALSE	FALSE
25_v.txt	32272	32272-Deletion-G--	Deletion	1	G	-	1	15198	0.00658	38	msh3	FALSE	CAN	JSY15	2	msh3-Rep2	CGG	nope	>1bp-ins	G/C-1	none	G/C-1	AAATACGGGAACC	GGGAACC	GCC	GCC	C	none	C>none	C>none_GCC	G/C-1_GGGAACC	6	1195	FALSE	FALSE
25_v.txt	32358	32358-Deletion-C--	Deletion	1	C	-	7	15198	0.0460587	62.1429	msh3	FALSE	CAN	JSY15	2	msh3-Rep2	ACC	nope	>1bp-ins	G/C-1	none	G/C-1	TTTGTACCAGAGT	CCAGAGT	TGG	ACC	C	none	nope	nope_ACC	G/C-1_CCAGAGT	6	1109	FALSE	FALSE
25_v.txt	32375	32375-Deletion-A--	Deletion	1	A	-	7	15198	0.0460587	64	msh3	FALSE	CAN	JSY15	2	msh3-Rep2	CAA	nope	>1bp-ins	A/T-1	none	A/T-1	AATAGCAATAATA	AATAATA	GTT	GTT	T	none	T>none	T>none_GTT	A/T-1_AATAATA	6	1092	FALSE	FALSE
25_v.txt	32424	32424-Deletion-G--	Deletion	1	G	-	10	15198	0.0657981	61.3	msh3	FALSE	CAN	JSY15	2	msh3-Rep2	AGG	nope	>1bp-ins	G/C-1	none	G/C-1	AGTTTAGGGTCAT	GGGTCAT	TCC	TCC	C	none	C>none	C>none_TCC	G/C-1_GGGTCAT	6	1043	FALSE	FALSE
25_v.txt	32459	32459-Deletion-T--	Deletion	1	T	-	7	15198	0.0460587	54.4286	msh3	FALSE	CAN	JSY15	2	msh3-Rep2	ATA	nope	>1bp-ins	A/T-1	none	A/T-1	GAATAATAGAGAG	TAGAGAG	TAT	ATA	T	none	nope	nope_ATA	A/T-1_TAGAGAG	6	1008	FALSE	FALSE
25_v.txt	32461	32461-Deletion-G--	Deletion	1	G	-	7	15198	0.0460587	54.4286	msh3	FALSE	CAN	JSY15	2	msh3-Rep2	AGA	nope	>1bp-ins	G/C-1	none	G/C-1	ATAATAGAGAGCC	GAGAGCC	TCT	TCT	C	none	C>none	C>none_TCT	G/C-1_GAGAGCC	6	1006	FALSE	FALSE
25_v.txt	32463	32463-Deletion-G--	Deletion	1	G	-	7	15198	0.0460587	54.4286	msh3	FALSE	CAN	JSY15	2	msh3-Rep2	AGA	nope	>1bp-ins	G/C-1	none	G/C-1	AATAGAGAGCCAA	GAGCCAA	TCT	TCT	C	none	C>none	C>none_TCT	G/C-1_GAGCCAA	6	1004	FALSE	FALSE
25_v.txt	32465	32465-Deletion-G--	Deletion	1	G	-	7	15198	0.0460587	54.4286	msh3	FALSE	CAN	JSY15	2	msh3-Rep2	AGC	nope	>1bp-ins	G/C-1	none	G/C-1	TAGAGAGCCAATG	GCCAATG	TCG	TCG	C	none	C>none	C>none_TCG	G/C-1_GCCAATG	6	1002	FALSE	FALSE
25_v.txt	32490	32490-Deletion-A--	Deletion	1	A	-	76	15198	0.500066	45.8158	msh3	FALSE	CAN	JSY15	2	msh3-Rep2	GAA	nope	>1bp-ins	A/T-1	none	A/T-1	ATACGGAAAACAA	AAAACAA	CTT	CTT	T	none	T>none	T>none_CTT	A/T-1_AAAACAA	6	977	FALSE	FALSE
25_v.txt	32498	32498-Deletion-T--	Deletion	1	T	-	36	15198	0.236873	43.4722	msh3	FALSE	CAN	JSY15	2	msh3-Rep2	CTT	nope	>1bp-ins	A/T-1	none	A/T-1	AACAACTTTTTTG	TTTTTTG	GAA	CTT	T	none	nope	nope_CTT	A/T-1_TTTTTTG	6	969	FALSE	FALSE
25_v.txt	32528	32528-Deletion-G--	Deletion	1	G	-	43	15198	0.282932	38.8837	msh3	FALSE	CAN	JSY15	2	msh3-Rep2	TGG	nope	>1bp-ins	G/C-1	none	G/C-1	TTTTCTGGGGTTT	GGGGTTT	ACC	ACC	C	none	C>none	C>none_ACC	G/C-1_GGGGTTT	6	939	FALSE	FALSE
25_v.txt	32608	32608-Deletion-C--	Deletion	1	C	-	17	23347	0.0728145	40.5882	msh3	FALSE	CAN	JSY15	2	msh3-Rep2	ACC	nope	>1bp-ins	G/C-1	none	G/C-1	AGGAAACCCAACC	CCCAACC	TGG	ACC	C	none	nope	nope_ACC	G/C-1_CCCAACC	6	859	FALSE	FALSE
25_v.txt	32631	32631-Deletion-T--	Deletion	1	T	-	12	23347	0.0513985	56.4167	msh3	FALSE	CAN	JSY15	2	msh3-Rep2	GTT	nope	>1bp-ins	A/T-1	none	A/T-1	CCTTCGTTTTTAT	TTTTTAT	CAA	GTT	T	none	nope	nope_GTT	A/T-1_TTTTTAT	6	836	FALSE	FALSE
25_v.txt	32658	32658-Deletion-C--	Deletion	1	C	-	81	23347	0.34694	59.7037	msh3	FALSE	CAN	JSY15	2	msh3-Rep2	ACC	nope	>1bp-ins	G/C-1	none	G/C-1	CCTGGACCCCAGG	CCCCAGG	TGG	ACC	C	none	nope	nope_ACC	G/C-1_CCCCAGG	6	809	FALSE	FALSE
25_v.txt	32670	32670-Deletion-G--	Deletion	1	G	-	94	23347	0.402621	57.3191	msh3	FALSE	CAN	JSY15	2	msh3-Rep2	TGG	nope	>1bp-ins	G/C-1	none	G/C-1	GCACCTGGGTTTC	GGGTTTC	ACC	ACC	C	none	C>none	C>none_ACC	G/C-1_GGGTTTC	6	797	FALSE	FALSE
25_v.txt	32700	32700-Deletion-C--	Deletion	1	C	-	3	23347	0.0128496	55.3333	msh3	FALSE	CAN	JSY15	2	msh3-Rep2	GCC	nope	>1bp-ins	G/C-1	none	G/C-1	ACTGGGCCGGTAA	CCGGTAA	CGG	GCC	C	none	nope	nope_GCC	G/C-1_CCGGTAA	6	767	FALSE	FALSE
25_v.txt	32728	32728-Deletion-A--	Deletion	1	A	-	24	23347	0.102797	59	msh3	FALSE	CAN	JSY15	2	msh3-Rep2	CAA	nope	>1bp-ins	A/T-1	none	A/T-1	CCATACAAAAACA	AAAAACA	GTT	GTT	T	none	T>none	T>none_GTT	A/T-1_AAAAACA	6	739	FALSE	FALSE
25_v.txt	32842	32842-Deletion-A--	Deletion	1	A	-	137	23346	0.586824	41.9635	msh3	FALSE	CAN	JSY15	2	msh3-Rep2	CAA	nope	>1bp-ins	A/T-1	none	A/T-1	TTACCCAAAAAAT	AAAAAAT	GTT	GTT	T	none	T>none	T>none_GTT	A/T-1_AAAAAAT	6	625	FALSE	FALSE
25_v.txt	32860	32860-Deletion-C--	Deletion	1	C	-	2	23343	0.008568	38	msh3	FALSE	CAN	JSY15	2	msh3-Rep2	GCC	nope	>1bp-ins	G/C-1	none	G/C-1	TCCATGCCGCCAG	CCGCCAG	CGG	GCC	C	none	nope	nope_GCC	G/C-1_CCGCCAG	6	607	FALSE	FALSE
25_v.txt	32884	32884-Deletion-A--	Deletion	1	A	-	5	24950	0.0200401	35.8	msh3	FALSE	CAN	JSY15	2	msh3-Rep2	CAA	nope	>1bp-ins	A/T-1	none	A/T-1	ACGTCCAAAATTG	AAAATTG	GTT	GTT	T	none	T>none	T>none_GTT	A/T-1_AAAATTG	6	583	FALSE	FALSE
25_v.txt	32901	32901-Deletion-C--	Deletion	1	C	-	2	24950	0.008016	48.5	msh3	FALSE	CAN	JSY15	2	msh3-Rep2	GCC	nope	>1bp-ins	G/C-1	none	G/C-1	ACTTGGCCAACTA	CCAACTA	CGG	GCC	C	none	nope	nope_GCC	G/C-1_CCAACTA	6	566	FALSE	FALSE
25_v.txt	32924	32924-Deletion-A--	Deletion	1	A	-	25	24950	0.1002	52.48	msh3	FALSE	CAN	JSY15	2	msh3-Rep2	CAA	nope	>1bp-ins	A/T-1	none	A/T-1	CAGGGCAAAAGTG	AAAAGTG	GTT	GTT	T	none	T>none	T>none_GTT	A/T-1_AAAAGTG	6	543	FALSE	FALSE
25_v.txt	32935	32935-Deletion-C--	Deletion	1	C	-	4	24950	0.0160321	43.5	msh3	FALSE	CAN	JSY15	2	msh3-Rep2	GCC	nope	>1bp-ins	G/C-1	none	G/C-1	TGATTGCCCAAGA	CCCAAGA	CGG	GCC	C	none	nope	nope_GCC	G/C-1_CCCAAGA	6	532	FALSE	FALSE
25_v.txt	33018	33018-Deletion-G--	Deletion	1	G	-	34	24950	0.136273	61.5	msh3	FALSE	CAN	JSY15	2	msh3-Rep2	TGT	nope	>1bp-ins	G/C-1	none	G/C-1	GAGGATGTAACAG	GTAACAG	ACA	ACA	C	none	C>none	C>none_ACA	G/C-1_GTAACAG	6	449	FALSE	FALSE
25_v.txt	33081	33081-Deletion-A--	Deletion	1	A	-	2	24950	0.008016	63	msh3	FALSE	CAN	JSY15	2	msh3-Rep2	CAT	nope	>1bp-ins	A/T-1	none	A/T-1	GAACCCATAAATA	ATAAATA	GTA	GTA	T	none	T>none	T>none_GTA	A/T-1_ATAAATA	6	386	FALSE	FALSE
25_v.txt	33082	33082-Deletion-T--	Deletion	1	T	-	4	24950	0.0160321	44.5	msh3	FALSE	CAN	JSY15	2	msh3-Rep2	ATA	nope	>1bp-ins	A/T-1	none	A/T-1	AACCCATAAATAA	TAAATAA	TAT	ATA	T	none	nope	nope_ATA	A/T-1_TAAATAA	6	385	FALSE	FALSE
25_v.txt	33083	33083-Deletion-A--	Deletion	1	A	-	1	24949	0.004008	37	msh3	FALSE	CAN	JSY15	2	msh3-Rep2	TAA	nope	>1bp-ins	A/T-1	none	A/T-1	ACCCATAAATAAA	AAATAAA	ATT	ATT	T	none	T>none	T>none_ATT	A/T-1_AAATAAA	6	384	FALSE	FALSE
25_v.txt	33086	33086-Deletion-T--	Deletion	1	T	-	3	24950	0.012024	28.3333	msh3	FALSE	CAN	JSY15	2	msh3-Rep2	ATA	nope	>1bp-ins	A/T-1	none	A/T-1	CATAAATAAATAT	TAAATAT	TAT	ATA	T	none	nope	nope_ATA	A/T-1_TAAATAT	6	381	FALSE	FALSE
25_v.txt	33093	33093-Deletion-G--	Deletion	1	G	-	2	24950	0.008016	50.5	msh3	FALSE	CAN	JSY15	2	msh3-Rep2	TGA	nope	>1bp-ins	G/C-1	none	G/C-1	AAATATGATATAA	GATATAA	ACT	ACT	C	none	C>none	C>none_ACT	G/C-1_GATATAA	6	374	FALSE	FALSE
25_v.txt	33122	33122-Deletion-G--	Deletion	1	G	-	21	24950	0.0841683	44.5238	msh3	FALSE	CAN	JSY15	2	msh3-Rep2	TGG	nope	>1bp-ins	G/C-1	none	G/C-1	GGCGTTGGTCAGA	GGTCAGA	ACC	ACC	C	none	C>none	C>none_ACC	G/C-1_GGTCAGA	6	345	FALSE	FALSE
25_v.txt	33147	33147-Deletion-A--	Deletion	1	A	-	9	24950	0.0360721	40.8889	msh3	FALSE	CAN	JSY15	2	msh3-Rep2	GAA	nope	>1bp-ins	A/T-1	none	A/T-1	CCAATGAAAAGAC	AAAAGAC	CTT	CTT	T	none	T>none	T>none_CTT	A/T-1_AAAAGAC	6	320	FALSE	FALSE
25_v.txt	33168	33168-Deletion-C--	Deletion	1	C	-	3	24947	0.0120255	38	msh3	FALSE	CAN	JSY15	2	msh3-Rep2	ACC	nope	>1bp-ins	G/C-1	none	G/C-1	ATAGTACCACCAA	CCACCAA	TGG	ACC	C	none	nope	nope_ACC	G/C-1_CCACCAA	6	299	FALSE	FALSE
25_v.txt	33474	33474-Deletion-C--	Deletion	1	C	-	23	11716	0.196313	27.9565	msh3	FALSE	CAN	JSY15	2	msh3-Rep2	GCC	nope	>1bp-ins	G/C-1	none	G/C-1	GCTATGCCTTTTT	CCTTTTT	CGG	GCC	C	none	nope	nope_GCC	G/C-1_CCTTTTT	6	N_A	FALSE	FALSE
26_v.txt	31986	31986-SNV-A-C	SNV	1	A	C	35	19232	0.181988	47.7143	msh3	FALSE	CAN	JSY16	3	msh3-Rep3	TAA	A>C	G/C+1	A/T-1	TA>GC	TA>GC	GGCATTAATTTAG	AATTTAG	ATT	ATT	T	G	T>G	T>G_ATT	TA>GC_AATTTAG	6	1481	FALSE	FALSE
26_v.txt	32081	32081-SNV-A-C	SNV	1	A	C	1	19231	0.0052	64	msh3	FALSE	CAN	JSY16	3	msh3-Rep3	CAA	A>C	G/C+1	A/T-1	TA>GC	TA>GC	CCATGCAAAAAAG	AAAAAAG	GTT	GTT	T	G	T>G	T>G_GTT	TA>GC_AAAAAAG	6	1386	FALSE	FALSE
26_v.txt	32162	32162-SNV-A-C	SNV	1	A	C	3	19231	0.0155998	19	msh3	FALSE	CAN	JSY16	3	msh3-Rep3	AAG	A>C	G/C+1	A/T-1	TA>GC	TA>GC	AGCCAAAGCGCCA	AGCGCCA	TTC	TTC	T	G	T>G	T>G_TTC	TA>GC_AGCGCCA	6	1305	FALSE	FALSE
26_v.txt	32226	32226-SNV-A-C	SNV	1	A	C	53	19230	0.275611	37.566	msh3	FALSE	CAN	JSY16	3	msh3-Rep3	CAG	A>C	G/C+1	A/T-1	TA>GC	TA>GC	CTTGACAGGAATT	AGGAATT	GTC	GTC	T	G	T>G	T>G_GTC	TA>GC_AGGAATT	6	1241	FALSE	FALSE
26_v.txt	32241	32241-SNV-A-C	SNV	1	A	C	7	19225	0.0364109	30.2857	msh3	FALSE	CAN	JSY16	3	msh3-Rep3	CAA	A>C	G/C+1	A/T-1	TA>GC	TA>GC	GGAGCCAACTTGT	AACTTGT	GTT	GTT	T	G	T>G	T>G_GTT	TA>GC_AACTTGT	6	1226	FALSE	FALSE
26_v.txt	32262	32262-SNV-A-C	SNV	1	A	C	15	59249	0.0253169	29	msh3	FALSE	CAN	JSY16	3	msh3-Rep3	AAA	A>C	G/C+1	A/T-1	TA>GC	TA>GC	AGACCAAATAAAA	AATAAAA	TTT	TTT	T	G	T>G	T>G_TTT	TA>GC_AATAAAA	6	1205	FALSE	FALSE
26_v.txt	32294	32294-SNV-A-C	SNV	1	A	C	148	59248	0.249797	50.7434	msh3	FALSE	CAN	JSY16	3	msh3-Rep3	AAT	A>C	G/C+1	A/T-1	TA>GC	TA>GC	ATTTGAATTTGCG	ATTTGCG	TTA	TTA	T	G	T>G	T>G_TTA	TA>GC_ATTTGCG	6	1173	FALSE	FALSE
26_v.txt	32320	32320-SNV-A-C	SNV	1	A	C	12	59248	0.0202538	18.4999	msh3	FALSE	CAN	JSY16	3	msh3-Rep3	AAG	A>C	G/C+1	A/T-1	TA>GC	TA>GC	TTGTTAAGATAAC	AGATAAC	TTC	TTC	T	G	T>G	T>G_TTC	TA>GC_AGATAAC	6	1147	FALSE	FALSE
26_v.txt	32327	32327-SNV-A-C	SNV	1	A	C	2	59248	0.003376	60.498	msh3	FALSE	CAN	JSY16	3	msh3-Rep3	CAG	A>C	G/C+1	A/T-1	TA>GC	TA>GC	GATAACAGCGTTG	AGCGTTG	GTC	GTC	T	G	T>G	T>G_GTC	TA>GC_AGCGTTG	6	1140	FALSE	FALSE
26_v.txt	32375	32375-SNV-A-C	SNV	1	A	C	2	59248	0.003376	36.5007	msh3	FALSE	CAN	JSY16	3	msh3-Rep3	CAA	A>C	G/C+1	A/T-1	TA>GC	TA>GC	AATAGCAATAATA	AATAATA	GTT	GTT	T	G	T>G	T>G_GTT	TA>GC_AATAATA	6	1092	FALSE	FALSE
26_v.txt	32397	32397-SNV-A-C	SNV	1	A	C	2	59247	0.003376	63.9994	msh3	FALSE	CAN	JSY16	3	msh3-Rep3	AAC	A>C	G/C+1	A/T-1	TA>GC	TA>GC	GTAGAAACGTAGG	ACGTAGG	TTG	TTG	T	G	T>G	T>G_TTG	TA>GC_ACGTAGG	6	1070	FALSE	FALSE
26_v.txt	32439	32439-SNV-A-C	SNV	1	A	C	14	59248	0.0236295	49.2143	msh3	FALSE	CAN	JSY16	3	msh3-Rep3	AAC	A>C	G/C+1	A/T-1	TA>GC	TA>GC	TATGGAACTAAAA	ACTAAAA	TTG	TTG	T	G	T>G	T>G_TTG	TA>GC_ACTAAAA	6	1028	FALSE	FALSE
26_v.txt	32493	32493-SNV-A-C	SNV	1	A	C	15	59237	0.025322	30.6667	msh3	FALSE	CAN	JSY16	3	msh3-Rep3	AAC	A>C	G/C+1	A/T-1	TA>GC	TA>GC	CGGAAAACAACTT	ACAACTT	TTG	TTG	T	G	T>G	T>G_TTG	TA>GC_ACAACTT	6	974	FALSE	FALSE
26_v.txt	32842	32842-SNV-A-C	SNV	1	A	C	2	7131	0.0280466	30.5	msh3	FALSE	CAN	JSY16	3	msh3-Rep3	CAA	A>C	G/C+1	A/T-1	TA>GC	TA>GC	TTACCCAAAAAAT	AAAAAAT	GTT	GTT	T	G	T>G	T>G_GTT	TA>GC_AAAAAAT	6	625	FALSE	FALSE
26_v.txt	32913	32913-SNV-A-C	SNV	1	A	C	16	18642	0.0858277	30.5	msh3	FALSE	CAN	JSY16	3	msh3-Rep3	AAG	A>C	G/C+1	A/T-1	TA>GC	TA>GC	ACACTAAGTTCCA	AGTTCCA	TTC	TTC	T	G	T>G	T>G_TTC	TA>GC_AGTTCCA	6	554	FALSE	FALSE
26_v.txt	32941	32941-SNV-A-C	SNV	1	A	C	5	18642	0.0268212	12.7998	msh3	FALSE	CAN	JSY16	3	msh3-Rep3	GAA	A>C	G/C+1	A/T-1	TA>GC	TA>GC	CCCAAGAAAACCA	AAAACCA	CTT	CTT	T	G	T>G	T>G_CTT	TA>GC_AAAACCA	6	526	FALSE	FALSE
26_v.txt	32948	32948-SNV-A-C	SNV	1	A	C	54	18642	0.289668	51.1296	msh3	FALSE	CAN	JSY16	3	msh3-Rep3	AAT	A>C	G/C+1	A/T-1	TA>GC	TA>GC	AAACCAATACATG	ATACATG	TTA	TTA	T	G	T>G	T>G_TTA	TA>GC_ATACATG	6	519	FALSE	FALSE
26_v.txt	33039	33039-SNV-A-C	SNV	1	A	C	11	18642	0.0590065	59.0909	msh3	FALSE	CAN	JSY16	3	msh3-Rep3	CAT	A>C	G/C+1	A/T-1	TA>GC	TA>GC	GTAGCCATTTCAC	ATTTCAC	GTA	GTA	T	G	T>G	T>G_GTA	TA>GC_ATTTCAC	6	428	FALSE	FALSE
26_v.txt	33065	33065-SNV-A-C	SNV	1	A	C	1	18642	0.005364	63.9996	msh3	FALSE	CAN	JSY16	3	msh3-Rep3	AAT	A>C	G/C+1	A/T-1	TA>GC	TA>GC	GACAGAATATGCC	ATATGCC	TTA	TTA	T	G	T>G	T>G_TTA	TA>GC_ATATGCC	6	402	FALSE	FALSE
26_v.txt	32081	32081-SNV-A-G	SNV	1	A	G	6	19231	0.0311996	64	msh3	FALSE	CAN	JSY16	3	msh3-Rep3	CAA	A>G	G/C+1	A/T-1	TA>CG	TA>CG	CCATGCAAAAAAG	AAAAAAG	GTT	GTT	T	C	T>C	T>C_GTT	TA>CG_AAAAAAG	6	1386	FALSE	FALSE
26_v.txt	32162	32162-SNV-A-G	SNV	1	A	G	9	19231	0.0467994	34.3333	msh3	FALSE	CAN	JSY16	3	msh3-Rep3	AAG	A>G	G/C+1	A/T-1	TA>CG	TA>CG	AGCCAAAGCGCCA	AGCGCCA	TTC	TTC	T	C	T>C	T>C_TTC	TA>CG_AGCGCCA	6	1305	FALSE	FALSE
26_v.txt	32256	32256-SNV-A-G	SNV	1	A	G	81	59232	0.13675	36.8395	msh3	FALSE	CAN	JSY16	3	msh3-Rep3	TAG	A>G	G/C+1	A/T-1	TA>CG	TA>CG	TTTGATAGACCAA	AGACCAA	ATC	ATC	T	C	T>C	T>C_ATC	TA>CG_AGACCAA	6	1211	FALSE	FALSE
26_v.txt	32293	32293-SNV-A-G	SNV	1	A	G	50	59248	0.084391	52.6998	msh3	FALSE	CAN	JSY16	3	msh3-Rep3	GAA	A>G	G/C+1	A/T-1	TA>CG	TA>CG	TATTTGAATTTGC	AATTTGC	CTT	CTT	T	C	T>C	T>C_CTT	TA>CG_AATTTGC	6	1174	FALSE	FALSE
26_v.txt	32319	32319-SNV-A-G	SNV	1	A	G	12	59248	0.0202538	57.5833	msh3	FALSE	CAN	JSY16	3	msh3-Rep3	TAA	A>G	G/C+1	A/T-1	TA>CG	TA>CG	GTTGTTAAGATAA	AAGATAA	ATT	ATT	T	C	T>C	T>C_ATT	TA>CG_AAGATAA	6	1148	FALSE	FALSE
26_v.txt	32320	32320-SNV-A-G	SNV	1	A	G	8	59248	0.0135026	49.7492	msh3	FALSE	CAN	JSY16	3	msh3-Rep3	AAG	A>G	G/C+1	A/T-1	TA>CG	TA>CG	TTGTTAAGATAAC	AGATAAC	TTC	TTC	T	C	T>C	T>C_TTC	TA>CG_AGATAAC	6	1147	FALSE	FALSE
26_v.txt	32322	32322-SNV-A-G	SNV	1	A	G	6	59248	0.0101269	44.8333	msh3	FALSE	CAN	JSY16	3	msh3-Rep3	GAT	A>G	G/C+1	A/T-1	TA>CG	TA>CG	GTTAAGATAACAG	ATAACAG	CTA	CTA	T	C	T>C	T>C_CTA	TA>CG_ATAACAG	6	1145	FALSE	FALSE
26_v.txt	32324	32324-SNV-A-G	SNV	1	A	G	5	59248	0.008439	41.7992	msh3	FALSE	CAN	JSY16	3	msh3-Rep3	TAA	A>G	G/C+1	A/T-1	TA>CG	TA>CG	TAAGATAACAGCG	AACAGCG	ATT	ATT	T	C	T>C	T>C_ATT	TA>CG_AACAGCG	6	1143	FALSE	FALSE
26_v.txt	32327	32327-SNV-A-G	SNV	1	A	G	12	59248	0.0202538	57.0809	msh3	FALSE	CAN	JSY16	3	msh3-Rep3	CAG	A>G	G/C+1	A/T-1	TA>CG	TA>CG	GATAACAGCGTTG	AGCGTTG	GTC	GTC	T	C	T>C	T>C_GTC	TA>CG_AGCGTTG	6	1140	FALSE	FALSE
26_v.txt	32332	32332-SNV-T-C	SNV	1	T	C	12	59248	0.0202538	28.6667	msh3	FALSE	CAN	JSY16	3	msh3-Rep3	TTG	T>C	G/C+1	A/T-1	TA>CG	TA>CG	CAGCGTTGAAGAT	TGAAGAT	AAC	TTG	T	G	T>C	T>C_TTG	TA>CG_TGAAGAT	6	1135	FALSE	FALSE
26_v.txt	32375	32375-SNV-A-G	SNV	1	A	G	14	59248	0.0236295	56.1428	msh3	FALSE	CAN	JSY16	3	msh3-Rep3	CAA	A>G	G/C+1	A/T-1	TA>CG	TA>CG	AATAGCAATAATA	AATAATA	GTT	GTT	T	C	T>C	T>C_GTT	TA>CG_AATAATA	6	1092	FALSE	FALSE
26_v.txt	32392	32392-SNV-T-C	SNV	1	T	C	11	59246	0.0185667	45.8182	msh3	FALSE	CAN	JSY16	3	msh3-Rep3	GTA	T>C	G/C+1	A/T-1	TA>CG	TA>CG	GAGAAGTAGAAAC	TAGAAAC	CAT	GTA	T	G	T>C	T>C_GTA	TA>CG_TAGAAAC	6	1075	FALSE	FALSE
26_v.txt	32393	32393-SNV-A-G	SNV	1	A	G	12	59246	0.0202545	56.4995	msh3	FALSE	CAN	JSY16	3	msh3-Rep3	TAG	A>G	G/C+1	A/T-1	TA>CG	TA>CG	AGAAGTAGAAACG	AGAAACG	ATC	ATC	T	C	T>C	T>C_ATC	TA>CG_AGAAACG	6	1074	FALSE	FALSE
26_v.txt	32396	32396-SNV-A-G	SNV	1	A	G	10	59244	0.0168793	54.5	msh3	FALSE	CAN	JSY16	3	msh3-Rep3	AAA	A>G	G/C+1	A/T-1	TA>CG	TA>CG	AGTAGAAACGTAG	AACGTAG	TTT	TTT	T	C	T>C	T>C_TTT	TA>CG_AACGTAG	6	1071	FALSE	FALSE
26_v.txt	32445	32445-SNV-A-G	SNV	1	A	G	39	59248	0.065825	48.1282	msh3	FALSE	CAN	JSY16	3	msh3-Rep3	AAG	A>G	G/C+1	A/T-1	TA>CG	TA>CG	ACTAAAAGTCCAA	AGTCCAA	TTC	TTC	T	C	T>C	T>C_TTC	TA>CG_AGTCCAA	6	1022	FALSE	FALSE
26_v.txt	32450	32450-SNV-A-G	SNV	1	A	G	15	59247	0.0253177	34.8669	msh3	FALSE	CAN	JSY16	3	msh3-Rep3	CAA	A>G	G/C+1	A/T-1	TA>CG	TA>CG	AAGTCCAATGAAT	AATGAAT	GTT	GTT	T	C	T>C	T>C_GTT	TA>CG_AATGAAT	6	1017	FALSE	FALSE
26_v.txt	32451	32451-SNV-A-G	SNV	1	A	G	13	59247	0.021942	44.3845	msh3	FALSE	CAN	JSY16	3	msh3-Rep3	AAT	A>G	G/C+1	A/T-1	TA>CG	TA>CG	AGTCCAATGAATA	ATGAATA	TTA	TTA	T	C	T>C	T>C_TTA	TA>CG_ATGAATA	6	1016	FALSE	FALSE
26_v.txt	32452	32452-SNV-T-C	SNV	1	T	C	10	59248	0.0168782	42.1999	msh3	FALSE	CAN	JSY16	3	msh3-Rep3	ATG	T>C	G/C+1	A/T-1	TA>CG	TA>CG	GTCCAATGAATAA	TGAATAA	TAC	ATG	T	G	T>C	T>C_ATG	TA>CG_TGAATAA	6	1015	FALSE	FALSE
26_v.txt	32454	32454-SNV-A-G	SNV	1	A	G	10	59248	0.0168782	53.9999	msh3	FALSE	CAN	JSY16	3	msh3-Rep3	GAA	A>G	G/C+1	A/T-1	TA>CG	TA>CG	CCAATGAATAATA	AATAATA	CTT	CTT	T	C	T>C	T>C_CTT	TA>CG_AATAATA	6	1013	FALSE	FALSE
26_v.txt	32455	32455-SNV-A-G	SNV	1	A	G	10	59248	0.0168782	45.8982	msh3	FALSE	CAN	JSY16	3	msh3-Rep3	AAT	A>G	G/C+1	A/T-1	TA>CG	TA>CG	CAATGAATAATAG	ATAATAG	TTA	TTA	T	C	T>C	T>C_TTA	TA>CG_ATAATAG	6	1012	FALSE	FALSE
26_v.txt	32456	32456-SNV-T-C	SNV	1	T	C	7	59246	0.0118151	36.1428	msh3	FALSE	CAN	JSY16	3	msh3-Rep3	ATA	T>C	G/C+1	A/T-1	TA>CG	TA>CG	AATGAATAATAGA	TAATAGA	TAT	ATA	T	G	T>C	T>C_ATA	TA>CG_TAATAGA	6	1011	FALSE	FALSE
26_v.txt	32493	32493-SNV-A-G	SNV	1	A	G	17	59237	0.0286983	32.1765	msh3	FALSE	CAN	JSY16	3	msh3-Rep3	AAC	A>G	G/C+1	A/T-1	TA>CG	TA>CG	CGGAAAACAACTT	ACAACTT	TTG	TTG	T	C	T>C	T>C_TTG	TA>CG_ACAACTT	6	974	FALSE	FALSE
26_v.txt	32503	32503-SNV-T-C	SNV	1	T	C	8	59237	0.0135051	22.5	msh3	FALSE	CAN	JSY16	3	msh3-Rep3	TTG	T>C	G/C+1	A/T-1	TA>CG	TA>CG	CTTTTTTGATGGC	TGATGGC	AAC	TTG	T	G	T>C	T>C_TTG	TA>CG_TGATGGC	6	964	FALSE	FALSE
26_v.txt	32505	32505-SNV-A-G	SNV	1	A	G	13	59236	0.0219461	41.6923	msh3	FALSE	CAN	JSY16	3	msh3-Rep3	GAT	A>G	G/C+1	A/T-1	TA>CG	TA>CG	TTTTTGATGGCTC	ATGGCTC	CTA	CTA	T	C	T>C	T>C_CTA	TA>CG_ATGGCTC	6	962	FALSE	FALSE
26_v.txt	32734	32734-SNV-A-G	SNV	1	A	G	10	7131	0.140233	54.1	msh3	FALSE	CAN	JSY16	3	msh3-Rep3	CAG	A>G	G/C+1	A/T-1	TA>CG	TA>CG	AAAAACAGTATAT	AGTATAT	GTC	GTC	T	C	T>C	T>C_GTC	TA>CG_AGTATAT	6	733	FALSE	FALSE
26_v.txt	32842	32842-SNV-A-G	SNV	1	A	G	4	7131	0.0560931	37.75	msh3	FALSE	CAN	JSY16	3	msh3-Rep3	CAA	A>G	G/C+1	A/T-1	TA>CG	TA>CG	TTACCCAAAAAAT	AAAAAAT	GTT	GTT	T	C	T>C	T>C_GTT	TA>CG_AAAAAAT	6	625	FALSE	FALSE
26_v.txt	32941	32941-SNV-A-G	SNV	1	A	G	4	18642	0.0214569	45.249	msh3	FALSE	CAN	JSY16	3	msh3-Rep3	GAA	A>G	G/C+1	A/T-1	TA>CG	TA>CG	CCCAAGAAAACCA	AAAACCA	CTT	CTT	T	C	T>C	T>C_CTT	TA>CG_AAAACCA	6	526	FALSE	FALSE
26_v.txt	32993	32993-SNV-T-C	SNV	1	T	C	5	18642	0.0268212	35.5987	msh3	FALSE	CAN	JSY16	3	msh3-Rep3	TTT	T>C	G/C+1	A/T-1	TA>CG	TA>CG	GAATCTTTGTGAG	TTGTGAG	AAA	TTT	T	G	T>C	T>C_TTT	TA>CG_TTGTGAG	6	474	FALSE	FALSE
26_v.txt	33089	33089-SNV-A-G	SNV	1	A	G	1	18642	0.005364	63.9989	msh3	FALSE	CAN	JSY16	3	msh3-Rep3	AAT	A>G	G/C+1	A/T-1	TA>CG	TA>CG	AAATAAATATGAT	ATATGAT	TTA	TTA	T	C	T>C	T>C_TTA	TA>CG_ATATGAT	6	378	FALSE	FALSE
26_v.txt	33207	33207-SNV-T-C	SNV	1	T	C	14	21288	0.0657648	14.7855	msh3	FALSE	CAN	JSY16	3	msh3-Rep3	CTC	T>C	G/C+1	A/T-1	TA>CG	TA>CG	TTAAGCTCTCTCT	TCTCTCT	GAG	CTC	T	G	T>C	T>C_CTC	TA>CG_TCTCTCT	6	260	FALSE	FALSE
26_v.txt	33476	33476-SNV-T-C	SNV	1	T	C	34	21284	0.159744	30.7941	msh3	FALSE	CAN	JSY16	3	msh3-Rep3	CTT	T>C	G/C+1	A/T-1	TA>CG	TA>CG	TATGCCTTTTTTT	TTTTTTT	GAA	CTT	T	G	T>C	T>C_CTT	TA>CG_TTTTTTT	6	N_A	FALSE	FALSE
26_v.txt	32032	32032-SNV-T-A	SNV	1	T	A	43	19232	0.223586	59.7209	msh3	FALSE	CAN	JSY16	3	msh3-Rep3	TTC	T>A	A/T+1	A/T-1	TA>AT	TA>AT	GGTATTTCAAAGC	TCAAAGC	AAG	TTC	T	T	T>A	T>A_TTC	TA>AT_TCAAAGC	6	1435	FALSE	FALSE
26_v.txt	32314	32314-SNV-T-A	SNV	1	T	A	9	59248	0.0151904	50.551	msh3	FALSE	CAN	JSY16	3	msh3-Rep3	GTT	T>A	A/T+1	A/T-1	TA>AT	TA>AT	TAATGGTTGTTAA	TTGTTAA	CAA	GTT	T	T	T>A	T>A_GTT	TA>AT_TTGTTAA	6	1153	FALSE	FALSE
26_v.txt	32315	32315-SNV-T-A	SNV	1	T	A	10	59248	0.0168782	56.5947	msh3	FALSE	CAN	JSY16	3	msh3-Rep3	TTG	T>A	A/T+1	A/T-1	TA>AT	TA>AT	AATGGTTGTTAAG	TGTTAAG	AAC	TTG	T	T	T>A	T>A_TTG	TA>AT_TGTTAAG	6	1152	FALSE	FALSE
26_v.txt	32319	32319-SNV-A-T	SNV	1	A	T	7	59248	0.0118147	47.4285	msh3	FALSE	CAN	JSY16	3	msh3-Rep3	TAA	A>T	A/T+1	A/T-1	TA>AT	TA>AT	GTTGTTAAGATAA	AAGATAA	ATT	ATT	T	A	T>A	T>A_ATT	TA>AT_AAGATAA	6	1148	FALSE	FALSE
26_v.txt	32322	32322-SNV-A-T	SNV	1	A	T	5	59248	0.008439	55.1998	msh3	FALSE	CAN	JSY16	3	msh3-Rep3	GAT	A>T	A/T+1	A/T-1	TA>AT	TA>AT	GTTAAGATAACAG	ATAACAG	CTA	CTA	T	A	T>A	T>A_CTA	TA>AT_ATAACAG	6	1145	FALSE	FALSE
26_v.txt	32325	32325-SNV-A-T	SNV	1	A	T	7	59248	0.0118147	48.4278	msh3	FALSE	CAN	JSY16	3	msh3-Rep3	AAC	A>T	A/T+1	A/T-1	TA>AT	TA>AT	AAGATAACAGCGT	ACAGCGT	TTG	TTG	T	A	T>A	T>A_TTG	TA>AT_ACAGCGT	6	1142	FALSE	FALSE
26_v.txt	32331	32331-SNV-T-A	SNV	1	T	A	2	59247	0.003376	63.9975	msh3	FALSE	CAN	JSY16	3	msh3-Rep3	GTT	T>A	A/T+1	A/T-1	TA>AT	TA>AT	ACAGCGTTGAAGA	TTGAAGA	CAA	GTT	T	T	T>A	T>A_GTT	TA>AT_TTGAAGA	6	1136	FALSE	FALSE
26_v.txt	32332	32332-SNV-T-A	SNV	1	T	A	5	59248	0.008439	41.1999	msh3	FALSE	CAN	JSY16	3	msh3-Rep3	TTG	T>A	A/T+1	A/T-1	TA>AT	TA>AT	CAGCGTTGAAGAT	TGAAGAT	AAC	TTG	T	T	T>A	T>A_TTG	TA>AT_TGAAGAT	6	1135	FALSE	FALSE
26_v.txt	32377	32377-SNV-T-A	SNV	1	T	A	13	59241	0.0219443	52.9158	msh3	FALSE	CAN	JSY16	3	msh3-Rep3	ATA	T>A	A/T+1	A/T-1	TA>AT	TA>AT	TAGCAATAATAAA	TAATAAA	TAT	ATA	T	T	T>A	T>A_ATA	TA>AT_TAATAAA	6	1090	FALSE	FALSE
26_v.txt	32392	32392-SNV-T-A	SNV	1	T	A	5	59246	0.008439	55.5997	msh3	FALSE	CAN	JSY16	3	msh3-Rep3	GTA	T>A	A/T+1	A/T-1	TA>AT	TA>AT	GAGAAGTAGAAAC	TAGAAAC	CAT	GTA	T	T	T>A	T>A_GTA	TA>AT_TAGAAAC	6	1075	FALSE	FALSE
26_v.txt	32395	32395-SNV-A-T	SNV	1	A	T	1	59247	0.001688	63.9991	msh3	FALSE	CAN	JSY16	3	msh3-Rep3	GAA	A>T	A/T+1	A/T-1	TA>AT	TA>AT	AAGTAGAAACGTA	AAACGTA	CTT	CTT	T	A	T>A	T>A_CTT	TA>AT_AAACGTA	6	1072	FALSE	FALSE
26_v.txt	32450	32450-SNV-A-T	SNV	1	A	T	4	59247	0.006751	44.4999	msh3	FALSE	CAN	JSY16	3	msh3-Rep3	CAA	A>T	A/T+1	A/T-1	TA>AT	TA>AT	AAGTCCAATGAAT	AATGAAT	GTT	GTT	T	A	T>A	T>A_GTT	TA>AT_AATGAAT	6	1017	FALSE	FALSE
26_v.txt	32451	32451-SNV-A-T	SNV	1	A	T	2	59247	0.003376	63.9997	msh3	FALSE	CAN	JSY16	3	msh3-Rep3	AAT	A>T	A/T+1	A/T-1	TA>AT	TA>AT	AGTCCAATGAATA	ATGAATA	TTA	TTA	T	A	T>A	T>A_TTA	TA>AT_ATGAATA	6	1016	FALSE	FALSE
26_v.txt	32452	32452-SNV-T-A	SNV	1	T	A	8	59248	0.0135026	47.2493	msh3	FALSE	CAN	JSY16	3	msh3-Rep3	ATG	T>A	A/T+1	A/T-1	TA>AT	TA>AT	GTCCAATGAATAA	TGAATAA	TAC	ATG	T	T	T>A	T>A_ATG	TA>AT_TGAATAA	6	1015	FALSE	FALSE
26_v.txt	32454	32454-SNV-A-T	SNV	1	A	T	5	59248	0.008439	38.7999	msh3	FALSE	CAN	JSY16	3	msh3-Rep3	GAA	A>T	A/T+1	A/T-1	TA>AT	TA>AT	CCAATGAATAATA	AATAATA	CTT	CTT	T	A	T>A	T>A_CTT	TA>AT_AATAATA	6	1013	FALSE	FALSE
26_v.txt	32456	32456-SNV-T-A	SNV	1	T	A	6	59246	0.0101273	49.3328	msh3	FALSE	CAN	JSY16	3	msh3-Rep3	ATA	T>A	A/T+1	A/T-1	TA>AT	TA>AT	AATGAATAATAGA	TAATAGA	TAT	ATA	T	T	T>A	T>A_ATA	TA>AT_TAATAGA	6	1011	FALSE	FALSE
26_v.txt	32492	32492-SNV-A-T	SNV	1	A	T	2	59237	0.003376	37.4987	msh3	FALSE	CAN	JSY16	3	msh3-Rep3	AAA	A>T	A/T+1	A/T-1	TA>AT	TA>AT	ACGGAAAACAACT	AACAACT	TTT	TTT	T	A	T>A	T>A_TTT	TA>AT_AACAACT	6	975	FALSE	FALSE
26_v.txt	32499	32499-SNV-T-A	SNV	1	T	A	4	59237	0.006753	35.7496	msh3	FALSE	CAN	JSY16	3	msh3-Rep3	TTT	T>A	A/T+1	A/T-1	TA>AT	TA>AT	ACAACTTTTTTGA	TTTTTGA	AAA	TTT	T	T	T>A	T>A_TTT	TA>AT_TTTTTGA	6	968	FALSE	FALSE
26_v.txt	32503	32503-SNV-T-A	SNV	1	T	A	7	59237	0.0118169	31.9998	msh3	FALSE	CAN	JSY16	3	msh3-Rep3	TTG	T>A	A/T+1	A/T-1	TA>AT	TA>AT	CTTTTTTGATGGC	TGATGGC	AAC	TTG	T	T	T>A	T>A_TTG	TA>AT_TGATGGC	6	964	FALSE	FALSE
26_v.txt	32505	32505-SNV-A-T	SNV	1	A	T	13	59236	0.0219461	25.9231	msh3	FALSE	CAN	JSY16	3	msh3-Rep3	GAT	A>T	A/T+1	A/T-1	TA>AT	TA>AT	TTTTTGATGGCTC	ATGGCTC	CTA	CTA	T	A	T>A	T>A_CTA	TA>AT_ATGGCTC	6	962	FALSE	FALSE
26_v.txt	32990	32990-SNV-T-A	SNV	1	T	A	1	18641	0.005365	63.999	msh3	FALSE	CAN	JSY16	3	msh3-Rep3	ATC	T>A	A/T+1	A/T-1	TA>AT	TA>AT	AAGGAATCTTTGT	TCTTTGT	TAG	ATC	T	T	T>A	T>A_ATC	TA>AT_TCTTTGT	6	477	FALSE	FALSE
26_v.txt	32992	32992-SNV-T-A	SNV	1	T	A	7	18642	0.0375496	47.285	msh3	FALSE	CAN	JSY16	3	msh3-Rep3	CTT	T>A	A/T+1	A/T-1	TA>AT	TA>AT	GGAATCTTTGTGA	TTTGTGA	GAA	CTT	T	T	T>A	T>A_CTT	TA>AT_TTTGTGA	6	475	FALSE	FALSE
26_v.txt	32994	32994-SNV-T-A	SNV	1	T	A	2	18642	0.0107285	29.9997	msh3	FALSE	CAN	JSY16	3	msh3-Rep3	TTG	T>A	A/T+1	A/T-1	TA>AT	TA>AT	AATCTTTGTGAGA	TGTGAGA	AAC	TTG	T	T	T>A	T>A_TTG	TA>AT_TGTGAGA	6	473	FALSE	FALSE
26_v.txt	32996	32996-SNV-T-A	SNV	1	T	A	3	18642	0.0160927	61.9975	msh3	FALSE	CAN	JSY16	3	msh3-Rep3	GTG	T>A	A/T+1	A/T-1	TA>AT	TA>AT	TCTTTGTGAGAAA	TGAGAAA	CAC	GTG	T	T	T>A	T>A_GTG	TA>AT_TGAGAAA	6	471	FALSE	FALSE
26_v.txt	33066	33066-SNV-T-A	SNV	1	T	A	3	18642	0.0160927	54	msh3	FALSE	CAN	JSY16	3	msh3-Rep3	ATA	T>A	A/T+1	A/T-1	TA>AT	TA>AT	ACAGAATATGCCA	TATGCCA	TAT	ATA	T	T	T>A	T>A_ATA	TA>AT_TATGCCA	6	401	FALSE	FALSE
26_v.txt	33082	33082-SNV-T-A	SNV	1	T	A	4	18642	0.0214569	50.2432	msh3	FALSE	CAN	JSY16	3	msh3-Rep3	ATA	T>A	A/T+1	A/T-1	TA>AT	TA>AT	AACCCATAAATAA	TAAATAA	TAT	ATA	T	T	T>A	T>A_ATA	TA>AT_TAAATAA	6	385	FALSE	FALSE
26_v.txt	33090	33090-SNV-T-A	SNV	1	T	A	1	18642	0.005364	37.9969	msh3	FALSE	CAN	JSY16	3	msh3-Rep3	ATA	T>A	A/T+1	A/T-1	TA>AT	TA>AT	AATAAATATGATA	TATGATA	TAT	ATA	T	T	T>A	T>A_ATA	TA>AT_TATGATA	6	377	FALSE	FALSE
26_v.txt	33092	33092-SNV-T-A	SNV	1	T	A	7	18641	0.0375516	24.8566	msh3	FALSE	CAN	JSY16	3	msh3-Rep3	ATG	T>A	A/T+1	A/T-1	TA>AT	TA>AT	TAAATATGATATA	TGATATA	TAC	ATG	T	T	T>A	T>A_ATG	TA>AT_TGATATA	6	375	FALSE	FALSE
26_v.txt	33167	33167-SNV-A-T	SNV	1	A	T	2	18638	0.0107308	37.9973	msh3	FALSE	CAN	JSY16	3	msh3-Rep3	TAC	A>T	A/T+1	A/T-1	TA>AT	TA>AT	AATAGTACCACCA	ACCACCA	ATG	ATG	T	A	T>A	T>A_ATG	TA>AT_ACCACCA	6	300	FALSE	FALSE
26_v.txt	33190	33190-SNV-T-A	SNV	1	T	A	2	21287	0.009395	37.4996	msh3	FALSE	CAN	JSY16	3	msh3-Rep3	ATA	T>A	A/T+1	A/T-1	TA>AT	TA>AT	TACCAATATGTCT	TATGTCT	TAT	ATA	T	T	T>A	T>A_ATA	TA>AT_TATGTCT	6	277	FALSE	FALSE
26_v.txt	31962	31962-SNV-G-A	SNV	1	G	A	27	19232	0.140391	36.1111	msh3	FALSE	CAN	JSY16	3	msh3-Rep3	CGC	G>A	A/T+1	G/C-1	CG>TA	CG>TA	GTGGCCGCATAAT	GCATAAT	GCG	GCG	C	T	C>T	C>T_GCG	CG>TA_GCATAAT	6	1505	FALSE	FALSE
26_v.txt	31972	31972-SNV-C-T	SNV	1	C	T	12	19232	0.062396	37.5	msh3	FALSE	CAN	JSY16	3	msh3-Rep3	GCC	C>T	A/T+1	G/C-1	CG>TA	CG>TA	AATAAGCCAAGCC	CCAAGCC	CGG	GCC	C	A	C>T	C>T_GCC	CG>TA_CCAAGCC	6	1495	FALSE	FALSE
26_v.txt	32075	32075-SNV-C-T	SNV	1	C	T	9	19231	0.0467994	46.1123	msh3	FALSE	CAN	JSY16	3	msh3-Rep3	ACC	C>T	A/T+1	G/C-1	CG>TA	CG>TA	AAATAACCATGCA	CCATGCA	TGG	ACC	C	A	C>T	C>T_ACC	CG>TA_CCATGCA	6	1392	FALSE	FALSE
26_v.txt	32076	32076-SNV-C-T	SNV	1	C	T	22	19232	0.114393	60.0456	msh3	FALSE	CAN	JSY16	3	msh3-Rep3	CCA	C>T	A/T+1	G/C-1	CG>TA	CG>TA	AATAACCATGCAA	CATGCAA	GGT	CCA	C	A	C>T	C>T_CCA	CG>TA_CATGCAA	6	1391	FALSE	FALSE
26_v.txt	32092	32092-SNV-C-T	SNV	1	C	T	16	19232	0.0831947	59.3125	msh3	FALSE	CAN	JSY16	3	msh3-Rep3	GCA	C>T	A/T+1	G/C-1	CG>TA	CG>TA	AGCCTGCAACACC	CAACACC	CGT	GCA	C	A	C>T	C>T_GCA	CG>TA_CAACACC	6	1375	FALSE	FALSE
26_v.txt	32157	32157-SNV-G-A	SNV	1	G	A	9	19231	0.0467994	52.4446	msh3	FALSE	CAN	JSY16	3	msh3-Rep3	AGC	G>A	A/T+1	G/C-1	CG>TA	CG>TA	ATGTAAGCCAAAG	GCCAAAG	TCG	TCG	C	T	C>T	C>T_TCG	CG>TA_GCCAAAG	6	1310	FALSE	FALSE
26_v.txt	32158	32158-SNV-C-T	SNV	1	C	T	4	19232	0.0207987	50.2492	msh3	FALSE	CAN	JSY16	3	msh3-Rep3	GCC	C>T	A/T+1	G/C-1	CG>TA	CG>TA	TGTAAGCCAAAGC	CCAAAGC	CGG	GCC	C	A	C>T	C>T_GCC	CG>TA_CCAAAGC	6	1309	FALSE	FALSE
26_v.txt	32159	32159-SNV-C-T	SNV	1	C	T	3	19232	0.015599	55.3326	msh3	FALSE	CAN	JSY16	3	msh3-Rep3	CCA	C>T	A/T+1	G/C-1	CG>TA	CG>TA	GTAAGCCAAAGCG	CAAAGCG	GGT	CCA	C	A	C>T	C>T_CCA	CG>TA_CAAAGCG	6	1308	FALSE	FALSE
26_v.txt	32173	32173-SNV-C-T	SNV	1	C	T	18	19232	0.093594	49.5	msh3	FALSE	CAN	JSY16	3	msh3-Rep3	GCA	C>T	A/T+1	G/C-1	CG>TA	CG>TA	CAAATGCAGCAGT	CAGCAGT	CGT	GCA	C	A	C>T	C>T_GCA	CG>TA_CAGCAGT	6	1294	FALSE	FALSE
26_v.txt	32200	32200-SNV-G-A	SNV	1	G	A	7	19232	0.0363977	37.7124	msh3	FALSE	CAN	JSY16	3	msh3-Rep3	GGA	G>A	A/T+1	G/C-1	CG>TA	CG>TA	TGTATGGAACACC	GAACACC	CCT	CCT	C	T	C>T	C>T_CCT	CG>TA_GAACACC	6	1267	FALSE	FALSE
26_v.txt	32271	32271-SNV-C-T	SNV	1	C	T	84	59248	0.141777	33.1074	msh3	FALSE	CAN	JSY16	3	msh3-Rep3	ACG	C>T	A/T+1	G/C-1	CG>TA	CG>TA	AAAATACGGGAAC	CGGGAAC	TGC	ACG	C	A	C>T	C>T_ACG	CG>TA_CGGGAAC	6	1196	FALSE	FALSE
26_v.txt	32272	32272-SNV-G-A	SNV	1	G	A	79	59248	0.133338	36.557	msh3	FALSE	CAN	JSY16	3	msh3-Rep3	CGG	G>A	A/T+1	G/C-1	CG>TA	CG>TA	AAATACGGGAACC	GGGAACC	GCC	GCC	C	T	C>T	C>T_GCC	CG>TA_GGGAACC	6	1195	FALSE	FALSE
26_v.txt	32299	32299-SNV-C-T	SNV	1	C	T	92	59248	0.15528	52.0326	msh3	FALSE	CAN	JSY16	3	msh3-Rep3	GCG	C>T	A/T+1	G/C-1	CG>TA	CG>TA	AATTTGCGGCAGA	CGGCAGA	CGC	GCG	C	A	C>T	C>T_GCG	CG>TA_CGGCAGA	6	1168	FALSE	FALSE
26_v.txt	32326	32326-SNV-C-T	SNV	1	C	T	20	59248	0.0337564	46.3991	msh3	FALSE	CAN	JSY16	3	msh3-Rep3	ACA	C>T	A/T+1	G/C-1	CG>TA	CG>TA	AGATAACAGCGTT	CAGCGTT	TGT	ACA	C	A	C>T	C>T_ACA	CG>TA_CAGCGTT	6	1141	FALSE	FALSE
26_v.txt	32328	32328-SNV-G-A	SNV	1	G	A	4	59248	0.006751	52.7493	msh3	FALSE	CAN	JSY16	3	msh3-Rep3	AGC	G>A	A/T+1	G/C-1	CG>TA	CG>TA	ATAACAGCGTTGA	GCGTTGA	TCG	TCG	C	T	C>T	C>T_TCG	CG>TA_GCGTTGA	6	1139	FALSE	FALSE
26_v.txt	32329	32329-SNV-C-T	SNV	1	C	T	15	59247	0.0253177	47.4667	msh3	FALSE	CAN	JSY16	3	msh3-Rep3	GCG	C>T	A/T+1	G/C-1	CG>TA	CG>TA	TAACAGCGTTGAA	CGTTGAA	CGC	GCG	C	A	C>T	C>T_GCG	CG>TA_CGTTGAA	6	1138	FALSE	FALSE
26_v.txt	32330	32330-SNV-G-A	SNV	1	G	A	13	59248	0.0219417	49.1536	msh3	FALSE	CAN	JSY16	3	msh3-Rep3	CGT	G>A	A/T+1	G/C-1	CG>TA	CG>TA	AACAGCGTTGAAG	GTTGAAG	GCA	GCA	C	T	C>T	C>T_GCA	CG>TA_GTTGAAG	6	1137	FALSE	FALSE
26_v.txt	32333	32333-SNV-G-A	SNV	1	G	A	7	59246	0.0118151	35.7137	msh3	FALSE	CAN	JSY16	3	msh3-Rep3	TGA	G>A	A/T+1	G/C-1	CG>TA	CG>TA	AGCGTTGAAGATA	GAAGATA	ACT	ACT	C	T	C>T	C>T_ACT	CG>TA_GAAGATA	6	1134	FALSE	FALSE
26_v.txt	32413	32413-SNV-G-A	SNV	1	G	A	1468	59248	2.47772	58.8604	msh3	FALSE	CAN	JSY16	3	msh3-Rep3	TGT	G>A	A/T+1	G/C-1	CG>TA	CG>TA	TAGATTGTGTTAG	GTGTTAG	ACA	ACA	C	T	C>T	C>T_ACA	CG>TA_GTGTTAG	6	1054	FALSE	FALSE
[truncated: 37,846 more rows]
